# Supplementary material for: Elucidation of the mechanism by which the foliar application of triacontanol enhances Cd enrichment in Tagetes patula L. through morphological, metabolomic, and transcriptomic analyses
Source: Royal Society of Chemistry journal article supplement (doi:10.1039/d4em00736k), 2025-01-01
Supplement: d4em00736k2.xlsx [file d4em00736k2.xlsx]

## Sheet: Table S1
	Table S1 The basic physical and chemical properties of soil
	Test item	Value
	pH	8.2
	Electrical conductivity	263.2 mS cm-1
	Cation exchange capacity	13.6 cmol kg-1
	Total Cd	0.663 mg kg-1
	DTPA-Cd	0.222 mg kg-1
	Organic matter	27.9 g kg-1
	Total N	1.48 g kg-1
	Total P	1.22 g kg-1
	Total K	6.33 g kg-1

## Sheet: Table S2
	Table S2 Pot experiment design
	Application frequency	Application period	Application dosage
			Low dosage (Dilute 2000 times, L)	High dosage (Dilute 1000 times, H)
	0	—	CK
	1	Seedling period (SP)	SP_L	SP_H
		Bloom period (BP)	BP_L	BP_H
	2	Seedling and bloom period (SB)	SB_L	SB_H

## Sheet: Table S3
	Table S3 Extraction steps of six chemical forms of Cd from T. patula leaves
	Extraction step	Fraction	Extractant	Extraction conditions
	1	Inorganic form (Ethanol-Cd)	80% ethanol	25 °C, 100 rpm/min, 22 h
	2	Water soluble form (dH2O-Cd)	dH2O	25 °C, 100 rpm/min, 22 h
	3	Pectates- and protein-integrated form (NaCl-Cd)	1 M NaCl	25 °C, 100 rpm/min, 22 h
	4	Insoluble metals phosphate and other metals-phosphate complexes (HAc-Cd)	2% acetic acid	25 °C, 100 rpm/min, 22 h
	5	Oxalate form (HCl-Cd)	0.6 M HCl	25 °C, 100 rpm/min, 22 h
	6	Residual (Res-Cd)	HNO3	Digestion

## Sheet: Table S4
	Table S4 The effect of triacontanol on the TF and BCF of Cd between T. patula and soil.
	Treatments	TF			BCF
		Stem/Root	Leaf/Stem	Flower/Stem	Root/Soil	Stem/Soil	Leaf/Soil	Flower/Soil
	CK	1.47±0.13 ab	1.94±0.036 e	0.14±0.012 b	0.39±0.057 a	0.57±0.041 ab	1.10±0.058 b	0.081±0.005 a
	SP_L	1.31±0.095 abc	2.37±0.31 cd	0.15±0.041 b	0.42±0.055 a	0.55±0.070 ab	1.30±0.048 ab	0.079±0.013 a
	SP_H	1.13±0.18 c	2.79±0.32 b	0.20±0.039 ab	0.39±0.046 a	0.44±0.037 c	1.22±0.16 ab	0.088±0.018 a
	BP_L	1.48±0.13 ab	2.32±0.12 cde	0.15±0.027 b	0.38±0.080 a	0.55±0.076 ab	1.28±0.14 a	0.080±0.004 a
	BP_H	1.17±0.086 bc	3.25±0.31 a	0.23±0.080 a	0.37±0.065 a	0.43±0.051 c	1.39±0.27 ab	0.10±0.046 a
	SB_L	1.51±0.048 a	2.25±0.19 de	0.14±0.003 b	0.40±0.024 a	0.61±0.029 a	1.37±0.18 ab	0.084±0.002 a
	SB_H	1.31±0.36 abc	2.65±0.13 bc	0.18±0.044 ab	0.40±0.11 a	0.50±0.025 bc	1.34±0.093 ab	0.089±0.018 a
	Note: Different letters indicate significant differences between different treatments

## Sheet: Table S5
Table S5 Overview of metabolite information
ID	Metabolite	代谢物	Metab ID	level	KEGG Pathway ID	KEGG Pathway Description	Library ID	Adducts	Formula	Retention time	通路	KEGG Compound ID	Mode	KEGG Compound First Category	KEGG Compound Second Category	KEGG Pathway First Category	KEGG Pathway Second Category	HMDB Superclass	HMDB Class	M/Z	RSD	Fragmentation Score	Theoretical Fragmentation Score	Mass Error	CAS ID	HMDB Subclass	CK1	CK2	CK3	CK4	CK5	CK6	SP1	SP2	SP3	SP4	SP5	SP6	BP1	BP2	BP3	BP4	BP5	BP6	QC01	QC02	QC03
pos_191	N-(3-Aminopropyl)-4-methyl-2-nitrobenzenamine	N-（3-氨丙基）-4-甲基-2-硝基苯胺	metab_1012	B(ii)	-	-	HMDB0254999	2M+H, 2M+ACN+H, M+ACN+H	C10H15N3O2	7.7793	-	-	pos	-	-	-	-	Benzenoids	Benzene and substituted derivatives	460.27	0.197455	0	59	9.09959	-	Nitrobenzenes	3.812	3.857	4.13	4.052	4.027	3.583	3.671	3.729	3.525	3.988	3.846	4.026	4.018	3.927	3.953	3.99	4.013	4.033	3.955	3.842	4.016
pos_1911	1-[(3R,4R,5R)-3-Fluoro-3,4-dihydroxy-5-(1-hydroxyethyl)oxolan-2-yl]pyrimidine-2,4-dione	1-[（3R，4R，5R）-3-氟-3,4-二羟基-5-（1-羟乙基）氧代烷-2-基]嘧啶-2,4-二酮	metab_1014	B(ii)	-	-	HMDB0257564	M+Na	C10H13FN2O6	11.9006	-	-	pos	-	-	-	-	Organic oxygen compounds	Organooxygen compounds	299.065	0.139326	0	50.4	-1.48885	-	Carbohydrates and carbohydrate conjugates	3.218	3.183	3.309	3.331	3.336	3.479	3.436	3.403	3.19	3.325	3.328	3.34	3.393	3.352	3.375	3.35	3.312	3.281	3.226	3.33	3.233
pos_1920	Defibrotide	去纤苷	metab_1024	B(ii)	-	-	HMDB0259562	M+NH4	C20H21N4O6P	11.5267	-	-	pos	-	-	-	-	Organic acids and derivatives	Organic phosphoric acids and derivatives	462.154	0.134463	0	51.8	1.54881	-	Phosphate esters	3.013	2.855	3.004	3.105	3.135	2.815	2.948	3.05	2.971	2.961	2.863	2.86	2.839	2.698	3.065	2.802	2.916	2.9	2.877	2.905	2.789
pos_1946	Mono-Benzyl malonate	-	metab_1052	B(ii)	-	-	HMDB0059721	M+Na	C10H10O4	11.3117	-	-	pos	-	-	-	-	Benzenoids	Benzene and substituted derivatives	217.047	0.202727	0	38.8	1.82742	40204-26-0	Benzyloxycarbonyls	1.478	1.502	1.684	1.358	1.481	1.731	1.647	1.518	1.489	1.458	1.571	1.663	1.695	1.565	1.68	1.527	1.676	1.537	1.574	1.458	1.632
pos_1096	Ataluren	阿塔鲁伦	metab_108	B(ii)	-	-	HMDB0248691	M+H-2H2O	C15H9FN2O3	1.0977	-	-	pos	-	-	-	-	Organoheterocyclic compounds	Azoles	249.045	0.179403	0	31.2	-2.85233	-	Oxadiazoles	3.196	3.208	3.456	3.314	3.351	3.455	3.424	3.476	3.482	3.668	3.586	3.578	3.512	3.567	3.732	3.545	3.61	3.386	3.422	3.545	3.577
pos_1103	Fructose-6-phosphate lactate	-	metab_117	B(ii)	-	-	HMDB0252492	M+CH3OH+H	C9H15O13P	1.1203	-	-	pos	-	-	-	-	Organic oxygen compounds	Organooxygen compounds	395.06	0.159036	0	56.4	4.16389	-	Carbohydrates and carbohydrate conjugates	2.596	2.472	2.599	2.826	2.8	2.897	2.541	2.432	2.453	2.849	2.702	2.533	2.79	2.799	2.85	2.772	2.921	2.567	2.581	2.721	2.675
pos_2052	1,10-Nonacosanediol	1，10 -二十九烷二醇	metab_1171	B(ii)	-	-	HMDB0030612	M+2Na-H	C29H60O2	11.2541	-	-	pos	-	-	-	-	Lipids and lipid-like molecules	Fatty Acyls	485.432	0.200612	0	96.2	4.17911	180005-29-2	Fatty alcohols	2.242	2.059	2.302	2.064	2.35	1.795	2.016	1.825	2.062	2.029	1.89	2.171	1.987	2.032	2.238	2.22	1.986	2.195	2.1	1.967	2.142
pos_2059	MG(0:0/22:1(13Z)/0:0)	-	metab_1178	B(ii)	-	-	HMDB0011552	M+Na	C25H48O4	11.2541	-	-	pos	-	-	-	-	Lipids and lipid-like molecules	Glycerolipids	435.348	0.154943	0	33.8	7.49499	-	Monoradylglycerols	1.886	1.625	1.915	1.472	1.979	1.707	1.837	1.65	1.899	1.86	1.671	1.86	1.639	1.489	1.912	1.828	1.629	1.733	1.747	1.781	1.872
pos_2065	(Z)-11-Eicosen-1-ol	（Z） -11-二十碳烯-1-醇	metab_1185	B(ii)	-	-	HMDB0034933	M+ACN+Na	C20H40O	11.2541	-	-	pos	-	-	-	-	Lipids and lipid-like molecules	Fatty Acyls	360.325	0.140133	0	94.3	3.20488	62442-62-0	Fatty alcohols	1.97	1.655	1.81	2.034	2.171	1.883	1.997	1.81	2.193	2.237	2.303	2.101	1.962	2.306	2.125	2.173	1.949	1.913	1.966	2.083	2.064
pos_2097	MG(0:0/18:1(11Z)/0:0)	-	metab_1220	B(ii)	-	-	HMDB0011536	M+H	C21H40O4	10.2223	-	-	pos	-	-	-	-	Lipids and lipid-like molecules	Glycerolipids	357.3	0.122631	0	49.8	0.630172	-	Monoradylglycerols	3.1	3.159	3.136	3.26	3.206	3.119	3.044	2.995	2.933	3.056	2.934	3.085	3.143	3.095	3.035	3.004	3.068	2.985	3.156	3.052	3.136
pos_2102	1,2,10-Trihydroxydihydro-trans-linalyl oxide 7-O-beta-D-glucopyranoside	1,2,10-三羟基二氢反式芳樟醇氧化物7-O-β-D-吡喃葡萄糖苷	metab_1227	B(ii)	-	-	HMDB0033237	M+NH4	C16H30O10	10.189	-	-	pos	-	-	-	-	Organic oxygen compounds	Organooxygen compounds	400.218	0.0695611	0	92.3	0.530424	219814-37-6	Carbohydrates and carbohydrate conjugates	2.732	2.736	2.667	2.782	2.785	2.561	2.509	2.592	2.493	2.701	2.547	2.635	2.6	2.679	2.581	2.759	2.534	2.466	2.686	2.661	2.625
pos_2103	Y-27632 Dihydrochloride	Y - 27632二盐酸盐	metab_1228	B(ii)	-	-	HMDB0259944	M+ACN+Na	C14H21N3O	10.189	-	-	pos	-	-	-	-	Organoheterocyclic compounds	Pyridines and derivatives	311.183	0.119268	0	47.8	-4.62509	-	Hydropyridines	2.581	2.663	2.631	2.825	2.653	2.681	2.605	2.547	2.572	2.717	2.598	2.703	2.706	2.701	2.656	2.623	2.596	2.625	2.709	2.611	2.697
pos_2122	Erucamide	芥酸酰胺	metab_1249	B(i)	-	-	HMDB0244507;LMFA08010028	2M+H	C22H43NO	10.0768	-	-	pos	-	-	-	-	Lipids and lipid-like molecules	Fatty Acyls	675.68	0.27046	58.3	0	5.26359	-	Fatty amides	1.989	2.42	2.462	2.787	2.439	2.018	2.156	1.91	2.834	2.409	2.776	2.17	2.053	2.673	2.495	2.635	1.767	2.102	2.621	2.557	2.378
pos_2138	(2S,3R,4R)-2-Amino-3,4-dihydroxy-2-(hydroxymethyl)-14-oxoicos-6-enoic acid	（2S，3R，4R）-2-氨基-3,4-二羟基-2-（羟甲基）-14-氧代-6-烯酸	metab_1266	B(ii)	-	-	HMDB0242536	M+NH4	C21H39NO6	10.0318	-	-	pos	-	-	-	-	Lipids and lipid-like molecules	Fatty Acyls	419.315	0.154284	0	33	8.89848	-	Fatty acids and conjugates	1.938	2.125	1.752	2.426	2.208	2.084	2.114	1.812	1.761	2.086	1.668	2.333	2.133	2.109	1.905	1.875	1.791	1.912	1.93	2.057	2.043
pos_2156	Azaperone	阿扎佩龙	metab_1286	B(ii)	-	-	HMDB0248764;HMDB0246686	M+CH3OH+H	C19H22FN3O	9.9535	-	-	pos	-	-	-	-	Organic oxygen compounds	Organooxygen compounds	360.207	0.199567	0	96.5	-3.65768	-	Carbonyl compounds	2.452	2.473	2.489	2.499	2.582	2.501	2.249	2.111	2.279	2.436	2.272	2.282	2.513	2.319	2.368	2.201	2.318	2.37	2.467	2.452	2.3
pos_2229	12-Ketodeoxycholic acid	12 -酮脱氧胆酸	metab_1367	B(ii)	-	-	HMDB0000328	M+CH3OH+H	C24H38O4	9.4538	-	-	pos	-	-	-	-	Lipids and lipid-like molecules	Steroids and steroid derivatives	423.31	0.155869	0	43.3	-0.350325	5130-29-0	Bile acids, alcohols and derivatives	1.996	2.529	0.873	0.5039	0.9072	0.8161	1.778	1.249	2.045	2.244	1.226	1.895	1.062	1.493	1.865	0.5692	1.556	1.952	1.763	1.73	1.63
pos_223	Arctiol	阿奇奥	metab_1368	B(ii)	-	-	HMDB0301955	M+H, M+NH4, M+H-H2O	C16H28O	9.2037	-	-	pos	-	-	-	-	Lipids and lipid-like molecules	Prenol lipids	254.248	0.0415696	0	42.8	1.6628	-	Sesquiterpenoids	4.349	4.23	4.397	4.475	4.461	4.348	4.379	4.349	4.318	4.243	4.269	4.328	4.422	4.386	4.315	4.393	4.418	4.314	4.382	4.348	4.356
pos_2234	10,11-dihydro-20-trihydroxy-leukotriene B4	10，11 -二氢- 20 -三羟基-白三烯B4	metab_1373	B(ii)	-	-	HMDB0012503;LMFA03020044	M+H	C20H34O7	9.4427	-	-	pos	-	-	-	-	Lipids and lipid-like molecules	Fatty Acyls	387.235	0.0891687	0	58.5	-7.58185	-	Eicosanoids	3.234	3.256	3.277	3.273	3.367	3.325	3.293	3.292	3.169	3.378	3.211	3.311	3.444	3.346	3.367	3.244	3.295	3.24	3.273	3.287	3.212
pos_2255	4-(2,6,6-Trimethyl-1,3-cyclohexadien-1-yl)-2-butanone	4-（2,6,6-三甲基-1,3-环己二烯-1-基）-2-丁酮	metab_1396	B(ii)	-	-	HMDB0037139	M+NH4	C13H20O	9.3192	-	-	pos	-	-	-	-	Lipids and lipid-like molecules	Prenol lipids	210.185	0.112685	0	60.8	-0.333297	20483-36-7	Sesquiterpenoids	2.602	2.519	2.827	2.701	2.52	2.76	2.562	2.57	2.51	2.695	2.421	2.626	2.808	2.637	2.65	2.814	2.582	2.536	2.513	2.593	2.606
pos_2256	L-lysyl-l-lysyl-l-lysine	-	metab_1397	B(ii)	-	-	HMDB0253899	M+H-H2O	C18H38N6O4	9.2968	-	-	pos	-	-	-	-	Organic acids and derivatives	Carboxylic acids and derivatives	385.293	0.0374505	0	56.6	2.57065	-	Amino acids, peptides, and analogues	3.089	3.263	2.495	2.875	2.989	3.086	2.998	2.708	2.781	3.282	3.476	2.966	2.908	3.145	2.984	2.733	3.072	2.607	3.015	3.047	3.035
pos_2267	PE(DiMe(9,5)/20:5(5Z,8Z,11Z,14Z,16E)-OH(18R))	-	metab_1409	B(ii)	-	-	HMDB0285126	M+ACN+H	C45H74NO10P	9.251	-	-	pos	-	-	-	-	Not Available	Not Available	861.545	0.258004	0	41	7.9211	-	Not Available	2.037	2.114	1.493	1.762	1.603	2.094	1.74	1.305	2.013	1.892	2.231	0.7028	1.35	2.016	1.942	2.179	2.077	1.553	1.678	1.774	1.897
pos_2278	(1R,9R,13R)-1,13-Dimethyl-10-[[(2R)-oxolan-2-yl]methyl]-10-azatricyclo[7.3.1.02,7]trideca-2(7),3,5-trien-4-ol	（1R，9R，13R）-1,13-二甲基-10-[[（2R）-氧代烷-2-基]甲基]-10-氮杂三环[7.3.1.02,7]十三碳-2（7），3,5-三烯-4-醇	metab_1421	B(ii)	-	-	HMDB0242342	2M+NH4	C19H27NO2	9.2273	-	-	pos	-	-	-	-	Alkaloids and derivatives	6,7-benzomorphans	620.444	0.0329559	0	37.7	2.75233	-	2,6-dimethyl-3-benzazocines	1.748	2.009	0.6025	1.879	1.901	2.032	1.887	0.9121	1.345	1.866	1.727	1.098	1.648	2.201	1.672	1.589	1.885	1.094	1.828	1.828	1.803
pos_2294	Propylene glycol mono-and diesters of fats and fatty acids	-	metab_1439	B(ii)	-	-	-	M+NH4	C32H62O4	9.1917	-	-	pos	-	-	-	-	-	-	528.5	0.0819426	0	42	2.68949	-	-	2.106	1.914	2.341	2.371	2.368	2.371	2.163	2.226	1.704	2.397	2.097	2.114	2.449	2.182	2.338	2.141	2.298	2.303	2.275	2.343	2.33
pos_2309	Altropane	丙三醇	metab_1456	B(ii)	-	-	HMDB0248262	M+NH4	C18H21FINO2	9.1334	-	-	pos	-	-	-	-	Alkaloids and derivatives	Tropane alkaloids	447.091	0.0851477	0	31.5	-6.21979	-	Phenyltropanes	2.083	2.149	0.4353	2.041	1.232	1.716	1.743	1.436	2.518	1.59	2.113	0.4789	1.528	1.911	1.792	1.262	2.029	1.596	1.981	1.939	2.012
pos_2310	PE(24:1(15Z)/6 keto-PGF1alpha)	-	metab_1458	B(ii)	-	-	HMDB0284574	M+NH4	C49H90NO12P	9.1215	-	-	pos	-	-	-	-	Not Available	Not Available	933.646	0.0700607	0	39.4	-8.16447	-	Not Available	2.352	2.164	2.634	2.47	2.324	2.436	2.331	2.43	2.041	2.331	2.004	2.353	2.222	2.219	2.475	2.208	2.466	2.496	2.164	2.217	2.167
pos_2339	DG(PGJ2/14:0/0:0)	-	metab_1489	B(ii)	-	-	HMDB0295094	M+H-2H2O	C37H62O7	9.0174	-	-	pos	-	-	-	-	Not Available	Not Available	583.441	0.157133	0	35.3	8.35899	-	Not Available	2.537	2.762	1.589	2.736	2.946	2.685	2.093	1.36	2.59	2.398	2.841	1.854	2.305	2.963	2.501	2.504	2.497	1.86	2.649	2.511	2.592
pos_2357	2-Hydroxy-2,6,6-trimethylcyclohexanone	2 -羟基- 2，6，6 -三甲基环己酮	metab_1509	B(ii)	-	-	HMDB0037023	2M+NH4	C9H16O2	8.9817	-	-	pos	-	-	-	-	Organic oxygen compounds	Organooxygen compounds	330.264	0.17391	0	79.8	1.35512	7500-42-7	Carbonyl compounds	1.813	2.101	1.391	1.906	2.194	2.1	1.992	1.972	2.054	1.755	1.943	2.033	2.259	1.905	1.757	1.972	2.146	1.709	1.968	2.03	2.115
pos_1134	Pelargonidin 3-O-[4-Hydroxy-3-methoxy-E-cinnamoyl-(->4)-a-L-rhamnopyranosyl-(1->6)-b-D-glucopyranoside] 5-O-b-D-glucopyranoside	天竺葵素3-O-[4-羟基-3-甲氧基-E-肉桂酰基-（>4）-a-L-鼠李糖吡喃糖基-（1->6）-b-D-吡喃葡萄糖苷]5-O-b-D-吡喃葡萄糖苷	metab_151	B(ii)	-	-	HMDB0033021	2M+3H2O+2H	C43H49O22+	1.2703	-	-	pos	-	-	-	-	Lipids and lipid-like molecules	Prenol lipids	931.278	0.188971	0	37.8	-6.09569	-	Triterpenoids	2.038	2.265	2.54	2.548	2.922	3.216	2.815	2.582	2.76	2.973	2.261	1.144	2.472	1.733	1.949	2.787	2.878	3.126	2.763	2.93	2.874
pos_2365	3-O-beta-D-glucosyl-brassicasterol	3-O-Beta-D-葡萄糖基~菜子甾醇	metab_1518	B(ii)	-	-	HMDB0304143	M+H-2H2O	C34H56O6	8.97	-	-	pos	-	-	-	-	Lipids and lipid-like molecules	Steroids and steroid derivatives	525.399	0.125116	0	91	9.23949	-	Steroidal glycosides	1.754	2.16	0.01854	1.945	2.169	1.706	1.017	0.01903	1.054	1.211	1.838	0.02156	1.114	2.232	1.603	1.586	1.55	0.02095	1.657	1.555	1.641
pos_2367	PS(PGF1alpha/18:1(11Z))	-	metab_1520	B(ii)	-	-	HMDB0281519	M+H-H2O	C44H80NO13P	8.9579	-	-	pos	-	-	-	-	Not Available	Not Available	844.535	0.0862041	0	48.6	1.4936	-	Not Available	2.076	2.003	0.4074	1.572	1.269	1.527	0.7668	0.4145	2.199	1.526	2.093	0.4495	0.4429	2.06	2.078	1.871	2.015	0.813	1.829	1.758	1.816
pos_237	3-Methyl-5-pentyl-2-furannonanoic acid	3 -甲基- 5 -戊基- 2 -呋喃壬酸	metab_1523	B(ii)	-	-	LMFA01150005;HMDB0031091	M+H, M+Na, M+H-H2O	C19H32O3	9.0984	-	-	pos	-	-	-	-	Lipids and lipid-like molecules	Fatty Acyls	309.243	0.0323267	0	38.5	1.09631	57818-39-0	Fatty acids and conjugates	3.191	3.672	2.606	3.044	3.182	3.151	3.031	2.764	3.197	3.256	3.287	2.725	2.908	3.126	3.343	3.151	3.403	2.617	3.213	3.226	3.241
pos_2371	Leu Lys Ala Val Val	-	metab_1525	B(i)	-	-	-	M+H	C25H48N6O6	8.9579	-	-	pos	-	-	-	-	-	-	529.375	0.0324574	45	0	8.0115	-	-	2.764	2.888	2.299	2.849	2.889	2.764	2.425	2.338	2.741	2.661	2.866	2.304	2.764	2.914	2.855	2.774	2.769	2.446	2.804	2.776	2.792
pos_2377	PC(18:1(9Z)-O(12,13)/18:2(9Z,12Z))	-	metab_1531	B(ii)	-	-	HMDB0286577	M+2Na-H	C44H80NO9P	8.9462	-	-	pos	-	-	-	-	Not Available	Not Available	842.521	0.205633	0	94.7	-9.06521	-	Not Available	1.843	1.438	0.4192	1.222	1	1.182	0.8541	0.4264	1.867	1.834	2.035	0.4619	0.4552	1.712	1.976	1.906	1.927	1.295	1.694	1.718	1.85
pos_2379	Esculentic acid (Phytolacca)	商陆酸（商陆）	metab_1533	B(ii)	-	-	HMDB0034639	M+CH3OH+H	C30H46O6	8.9462	-	-	pos	-	-	-	-	Lipids and lipid-like molecules	Prenol lipids	535.366	0.115139	0	41.4	6.1956	56283-68-2	Triterpenoids	2.316	2.813	1.964	2.223	2.277	2.233	2.145	2.217	2.096	2.419	2.092	2.101	1.955	2.127	2.476	2.272	2.394	1.833	2.34	2.252	2.344
pos_2389	LysoPE(15:0/0:0)	-	metab_1544	B(i)	-	-	HMDB0011502	M+H	C20H42NO7P	8.8997	-	-	pos	-	-	-	-	Lipids and lipid-like molecules	Glycerophospholipids	440.279	0.00853653	80.7	0	3.27529	-	Glycerophosphoethanolamines	2.614	2.845	2.129	2.051	1.818	2.571	2.478	2.071	2.707	2.637	2.907	2.148	1.852	2.556	2.644	2.53	2.591	1.998	2.552	2.559	2.558
pos_2401	Filipin II	菲利平Ⅱ	metab_1559	B(ii)	-	-	HMDB0252258;HMDB0242297	M+H	C35H58O10	8.8187	-	-	pos	-	-	-	-	Phenylpropanoids and polyketides	Macrolides and analogues	639.41	0.0149749	0	63.3	-0.61828	-	Not Available	2.972	2.993	2.865	2.993	2.911	2.986	2.872	2.82	2.896	2.991	2.905	2.916	2.952	2.959	2.948	2.839	2.962	2.876	2.955	2.95	2.963
pos_2404	LysoPE(0:0/18:2(9Z,12Z))	-	metab_1562	B(ii)	-	-	HMDB0011477	M+Na	C23H44NO7P	8.7956	-	-	pos	-	-	-	-	Lipids and lipid-like molecules	Glycerophospholipids	500.276	0.0206732	0	52	2.95968	-	Glycerophosphoethanolamines	3.503	3.742	3.289	3.16	3.145	3.245	3.355	3.195	3.441	3.474	3.545	3.437	3.085	3.442	3.42	3.44	3.464	3.212	3.355	3.37	3.37
pos_2405	LysoPA(18:1(9Z)/0:0)	-	metab_1563	B(ii)	-	-	HMDB0007855	M+ACN+H	C21H41O7P	8.7956	-	-	pos	-	-	-	-	Lipids and lipid-like molecules	Glycerophospholipids	478.293	0.0065022	0	68.2	1.33425	-	Glycerophosphates	4.329	4.631	4.023	3.963	3.973	4.007	4.056	3.866	4.347	4.223	4.401	4.06	3.801	4.255	4.246	4.247	4.24	3.939	4.18	4.179	4.175
pos_2406	PE(14:0/P-16:0)	-	metab_1564	B(ii)	-	-	HMDB0008850	M+H-H2O	C35H70NO7P	8.7841	-	-	pos	-	-	-	-	Lipids and lipid-like molecules	Glycerophospholipids	630.481	0.104651	0	47.1	-7.52736	-	Glycerophosphoethanolamines	2.611	2.717	2.016	2.703	2.825	2.673	2.592	1.864	2.088	2.625	2.543	2.078	2.54	2.945	2.471	2.317	2.489	1.826	2.48	2.546	2.57
pos_2409	Guaiol acetate	愈创木酚乙酸酯	metab_1567	B(ii)	-	-	HMDB0037218	M+H	C17H28O2	8.761	-	-	pos	-	-	-	-	Lipids and lipid-like molecules	Prenol lipids	265.217	0.0604032	0	37.4	3.05632	134-28-1	Sesquiterpenoids	2.38	2.654	2.116	2.437	2.502	2.424	2.726	2.06	2.378	2.615	2.562	2.243	2.435	2.495	2.721	2.421	3.046	1.892	2.499	2.526	2.552
pos_2418	PS(20:4(5Z,8Z,11Z,14Z)-OH(20)/16:1(9Z))	-	metab_1577	B(ii)	-	-	HMDB0281219	M+NH4	C42H72NO11P	8.7037	-	-	pos	-	-	-	-	Not Available	Not Available	815.516	0.0228913	0	45.5	-3.071	-	Not Available	2.377	2.189	2.176	2.424	2.326	2.359	2.292	2.272	2.336	2.388	2.327	2.285	2.405	2.394	2.372	2.261	2.432	2.257	2.354	2.371	2.371
pos_2420	13,14-Dihydro-15-keto-20-ethyl prostaglandin f2alpha	13,14-二氢-15-酮-20-乙基前列腺素f2alpha	metab_1580	B(ii)	-	-	HMDB0244515	M+Na	C22H38O5	8.7037	-	-	pos	-	-	-	-	Lipids and lipid-like molecules	Fatty Acyls	405.259	0.104522	0	42.9	-4.58314	-	Eicosanoids	2.541	2.617	2.069	2.292	2.243	2.593	2.64	2.253	2.48	2.639	2.568	2.414	2.491	2.873	2.983	2.458	2.853	2.271	2.571	2.62	2.662
pos_2431	Adomeglivant	阿多梅格利凡特	metab_1592	B(ii)	-	-	HMDB0248020	M+	C32H36F3NO4	8.6576	-	-	pos	-	-	-	-	Benzenoids	Benzene and substituted derivatives	555.262	0.071704	0	42.2	3.67671	-	Biphenyls and derivatives	2.638	2.108	1.812	2.207	2.059	2.246	2.578	2.309	3.03	2.299	2.426	1.669	2.076	2.262	2.32	2.221	2.568	2.15	2.47	2.443	2.408
pos_2432	N-[[(2S,3S,4R,5R)-3,4-Dihydroxy-5-[6-[(3-iodophenyl)methylamino]purin-9-yl]oxolan-2-yl]-hydroxymethyl]-N-methylformamide	N-[（2S，3S，4R，5R）-3,4-二羟基-5-[6-[（3-碘苯基）甲胺基]嘌呤-9-基]氧代烷-2-基]-羟甲基]-N-甲基甲酰胺	metab_1593	B(ii)	-	-	HMDB0258052	M+H-2H2O	C19H21IN6O5	8.6576	-	-	pos	-	-	-	-	Nucleosides, nucleotides, and analogues	Purine nucleosides	505.043	0.214536	0	50.2	-8.99122	-	Not Available	2.537	3.08	0.2938	2.311	1.943	0.3618	0.656	1.381	3.282	1.273	1.965	0.328	0.8304	2.112	1.978	1.731	1.86	1.147	2.341	2.157	2.242
pos_2433	LysoPE(16:1(9Z)/0:0)	-	metab_1594	B(ii)	-	-	HMDB0011504	M+Na	C21H42NO7P	8.6576	-	-	pos	-	-	-	-	Lipids and lipid-like molecules	Glycerophospholipids	474.26	0.0358126	0	62	2.2213	-	Glycerophosphoethanolamines	2.047	2.376	1.534	1.821	1.738	1.891	1.528	0.9387	2.318	2.143	2.368	1.481	0.7934	1.995	2.052	1.987	2.214	1.24	2.068	2.099	2.089
pos_2435	5-Ethynyl-5'-(1-propynyl)-2,2'-bithiophene	5-乙炔基-5’-（1-丙炔基）-2,2’-联噻吩	metab_1596	B(ii)	-	-	HMDB0029735	M+H	C13H8S2	8.6576	-	-	pos	-	-	-	-	Organoheterocyclic compounds	Bi- and oligothiophenes	229.014	0.0128572	0	42.3	-1.39768	17257-07-7	Not Available	4.35	4.999	3.571	4.383	4.288	4.087	3.698	3.899	4.522	3.922	4.247	3.738	4.008	4.322	4.228	4.125	4.199	3.849	4.329	4.318	4.323
pos_2438	Isopentenyladenine-9-N-glucoside	异戊烯腺嘌呤- 9 -葡萄糖氮苷	metab_1599	B(ii)	-	-	HMDB0012240	M+NH4	C16H23N5O5	8.6347	-	-	pos	-	-	-	-	Organic oxygen compounds	Organooxygen compounds	383.205	0.0346729	0	40.8	2.40504	83087-94-9	Carbohydrates and carbohydrate conjugates	2.705	2.683	2.701	2.77	2.758	3.156	2.698	2.667	2.593	2.864	2.816	2.757	2.839	2.872	2.795	2.679	2.775	2.677	2.738	2.755	2.768
pos_2443	DL-Methionine-4-antipyrineamide	Dl -蛋氨酸- 4 -安替比林酰胺	metab_1605	B(ii)	-	-	HMDB0251524	M+H-H2O	C16H22N4O2S	8.5777	-	-	pos	-	-	-	-	Organic acids and derivatives	Carboxylic acids and derivatives	317.14	0.0647977	0	42.5	-8.85097	-	Amino acids, peptides, and analogues	2.862	3.644	1.651	2.452	2.656	2.375	2.386	1.892	2.627	2.804	2.104	1.69	1.685	2.548	2.68	2.854	2.916	1.529	2.811	2.763	2.814
pos_2457	1H-Purine-2,6-dione, 3,7-dihydro-1,3-dimethyl-7-(3-(methylphenylamino)propyl)-	1H-嘌呤-2,6-二酮，3,7-二氢-1,3-二甲基-7-（3-（甲基苯氨基）丙基）-	metab_1620	B(ii)	-	-	HMDB0244897	M+NH4	C17H21N5O2	8.4864	-	-	pos	-	-	-	-	Organoheterocyclic compounds	Imidazopyrimidines	345.2	0.0582158	0	50.8	-9.41237	-	Purines and purine derivatives	2.035	2.358	1.221	1.611	1.581	1.66	1.568	1.603	1.554	1.853	1.852	1.563	1.639	1.987	1.973	1.775	1.971	1.456	1.783	1.822	1.831
pos_2467	(1R,2R,4R,5S)-(+)-p-Menthane-2,5-diol	（1R，2R，4R，5S）-（+）-对薄荷-2,5-二醇	metab_1631	B(ii)	-	-	HMDB0301947	M+H-H2O	C9H18O3	8.3841	-	-	pos	-	-	-	-	Organic oxygen compounds	Organooxygen compounds	157.122	0.191978	0	73	-0.814142	-	Alcohols and polyols	2.486	2.437	2.587	2.588	2.581	2.61	2.421	2.43	2.164	2.443	2.354	2.426	2.544	2.421	2.452	2.344	2.422	2.364	2.535	2.403	2.393
pos_2469	1-Caffeoylquinic acid	1 -咖啡酰奎宁酸	metab_1633	B(ii)	-	-	HMDB0304633;HMDB0030652	M+H-H2O	C16H18O9	8.3729	-	-	pos	-	-	-	-	Organic oxygen compounds	Organooxygen compounds	337.093	0.110022	0	36	3.99519	1241-87-8	Alcohols and polyols	2.406	2.228	1.595	2.11	2.027	1.955	2.292	2.241	2.717	2.315	2.227	1.787	2.087	2.181	2.199	2.098	2.206	2.205	2.41	2.314	2.371
pos_2470	Cytosine phosphate	磷酸胞苷	metab_1635	B(ii)	-	-	HMDB0250726	M+ACN+H	C4H2N3O5P	8.3729	-	-	pos	-	-	-	-	Organoheterocyclic compounds	Diazines	245.009	0.208693	0	30.7	8.52853	-	Pyrimidines and pyrimidine derivatives	2.191	3.064	0.8584	1.818	2.014	0.9713	0.8934	0.8684	2.401	0.9838	1.886	0.9168	1.441	1.477	1.813	1.781	1.514	0.9054	2.093	2.258	2.13
pos_2487	[2-(2-Methylphenyl)-1,3-dioxolan-4-yl]methanol	[2-（2-甲基苯基）-1,3-二氧戊环-4-基]甲醇	metab_1653	B(ii)	-	-	HMDB0059940	M+H-2H2O	C11H14O3	8.2819	-	-	pos	-	-	-	-	Benzenoids	Benzene and substituted derivatives	159.08	0.143564	0	59.8	-1.9545	-	Toluenes	1.745	2.231	0.2656	0.8749	0.9183	0.3292	1.437	0.2709	1.273	0.8646	0.9946	0.2975	0.2925	1.586	1.443	1.038	1.211	0.2912	1.355	1.351	1.245
pos_2502	Arctinol	牛蒡子醇	metab_1671	B(ii)	-	-	HMDB0302303	M+H-H2O	C13H12O2S2	8.1221	-	-	pos	-	-	-	-	Organoheterocyclic compounds	Bi- and oligothiophenes	247.024	0.115909	0	44.1	-1.76894	-	Not Available	1.696	2.131	0.228	1.529	1.411	1.308	1.256	1.026	1.962	1.227	1.799	0.2567	1.158	1.766	1.76	1.704	1.471	0.251	1.711	1.671	1.611
pos_2521	PC(20:3(8Z,11Z,14Z)/PGE2)	-	metab_1692	B(ii)	-	-	HMDB0287371	M+H-2H2O	C48H82NO11P	7.9278	-	-	pos	-	-	-	-	Not Available	Not Available	844.555	0.232668	0	34.7	7.58269	-	Not Available	1.432	1.431	1.838	1.856	1.962	1.065	1.736	1.202	1.243	1.536	0.9377	1.728	0.578	1.218	1.434	1.483	1.615	1.57	1.611	1.494	1.695
pos_2534	PG(i-12:0/TXB2)	-	metab_1706	B(ii)	-	-	HMDB0271087	M+H	C38H69O14P	7.8134	-	-	pos	-	-	-	-	Not Available	Not Available	781.453	0.210875	0	44.6	3.89608	-	Not Available	2.192	0.4865	2.331	2.418	2.666	2.921	2.606	2.456	2.543	2.117	2.615	2.378	2.537	2.362	2.344	2.739	2.702	2.394	2.334	2.512	2.494
pos_2536	Cocamidopropyl Betaine	-	metab_1708	B(i)	-	-	-	M+H	C19H38N2O3	7.8134	-	-	pos	-	-	-	-	-	-	343.296	0.138529	97.3	0	1.12917	-	-	1.171	0.9113	0.7303	1.453	1.24	1.095	0.8133	1.078	0.8707	2.707	1.572	1.642	1.601	1.572	1.364	1.092	1.273	0.8422	1.764	1.845	1.883
pos_2543	LEUCOGENENOL	促白细胞生成素	metab_1716	B(ii)	-	-	HMDB0254032	M+ACN+H	C18H25NO8	7.7564	-	-	pos	-	-	-	-	Organoheterocyclic compounds	Oxazines	425.195	0.0171567	0	53.8	8.4761	-	1,3-oxazines	3.031	2.865	2.105	2.534	2.073	2.774	3.052	2.702	2.779	2.777	2.736	2.185	1.935	2.754	2.975	3.102	2.905	2.237	2.819	2.804	2.811
pos_2583	Garcinia lactone dibutyl ester	藤黄酸内酯二丁酯	metab_1760	B(ii)	-	-	HMDB0040462	M+H-2H2O	C14H22O7	7.3905	-	-	pos	-	-	-	-	Organic acids and derivatives	Carboxylic acids and derivatives	267.123	0.0221634	0	49	1.45264	-	Tricarboxylic acids and derivatives	2.968	3.051	3.219	3.205	3.192	3.111	3.075	3.037	2.992	3.207	3.088	3.121	3.113	3.122	3.104	3.132	3.154	3.096	3.121	3.107	3.126
pos_2594	Arctic acid	牛蒡酸	metab_1772	B(ii)	-	-	HMDB0302294	M+H	C12H8O2S2	7.3325	-	-	pos	-	-	-	-	Organoheterocyclic compounds	Bi- and oligothiophenes	249.004	0.138791	0	49.8	2.25584	-	Not Available	1.983	2.371	0.5	1.728	1.903	1.301	1.078	0.5079	2.262	1.642	2.257	0.5469	1.672	2.202	2.142	1.812	1.874	0.5377	2.051	1.981	1.933
pos_2595	3-Hydroxydodecanedioic acid	3 -羟基十二烷二酸	metab_1773	B(ii)	-	-	HMDB0000413	M+H-2H2O	C12H22O5	7.321	-	-	pos	-	-	-	-	Organic acids and derivatives	Hydroxy acids and derivatives	211.133	0.0370868	0	40.8	1.33468	34574-69-1	Medium-chain hydroxy acids and derivatives	2.393	2.942	1.791	2.211	2.024	2.289	2.131	1.856	1.994	2.107	2.25	2.091	2.219	2.99	3.077	2.651	2.778	1.839	2.525	2.493	2.505
pos_2596	(R)-1-O-[b-D-Apiofuranosyl-(1->2)-b-D-glucopyranoside]-1,3-octanediol	（R） -1-O-[b-D-呋喃磺酰基-（1->2）-b-D-吡喃葡萄糖苷]-1,3-辛二醇	metab_1774	B(ii)	-	-	HMDB0032798	M+H-H2O	C21H40O9	7.3091	-	-	pos	-	-	-	-	Lipids and lipid-like molecules	Fatty Acyls	419.262	0.0653809	0	38.2	-4.56114	-	Fatty alcohols	1.762	1.894	1.807	1.752	1.746	1.697	1.87	1.836	1.683	1.877	1.887	1.863	1.967	1.852	1.879	1.855	1.913	1.92	1.801	1.823	1.856
pos_2597	15-Methylpalmitate	15-甲基棕榈酸酯	metab_1775	B(ii)	-	-	HMDB0241917;HMDB0061709	M+NH4	C17H34O2	7.3091	-	-	pos	-	-	-	-	Lipids and lipid-like molecules	Fatty Acyls	288.29	0.0969604	0	35.5	1.67435	-	Fatty acids and conjugates	3.656	3.584	3.65	3.649	3.63	3.713	3.692	3.752	3.71	3.732	3.741	3.85	3.816	3.812	3.866	3.748	3.828	3.768	3.761	3.834	3.838
pos_2599	Benzyl ethyl ketone	苄基乙基酮	metab_1777	B(ii)	-	-	HMDB0302410	M+CH3OH+H	C10H12O	7.2976	-	-	pos	-	-	-	-	Benzenoids	Benzene and substituted derivatives	181.122	0.095547	0	69.2	0.781617	-	Not Available	2.284	2.146	1.294	1.408	1.089	1.629	1.872	0.8573	2.137	1.715	1.703	1.97	1.745	2.299	2.092	1.504	1.923	1.734	1.864	1.922	1.945
pos_2601	Edoxudine	依度尿苷	metab_1781	B(ii)	-	-	HMDB0251705	M+Na	C11H16N2O5	7.2745	-	-	pos	-	-	-	-	Nucleosides, nucleotides, and analogues	Pyrimidine nucleosides	279.094	0.0262235	0	37.1	-4.06553	-	Pyrimidine 2''-deoxyribonucleosides	1.598	1.798	1.637	1.616	1.511	1.612	1.643	1.688	1.477	1.727	1.745	1.619	1.804	1.71	1.713	1.626	1.774	1.681	1.651	1.657	1.673
pos_2605	4-Methyl-1-phenyl-2-pentanol	4 -甲基- 1 -苯基- 2 -戊醇	metab_1785	B(ii)	-	-	HMDB0031568	M+CH3OH+H	C12H18O	7.2513	-	-	pos	-	-	-	-	Benzenoids	Benzene and substituted derivatives	211.169	0.217442	0	48.1	0.467391	7779-78-4	Not Available	1.756	1.833	1.57	1.774	1.652	1.334	1.48	1.459	1.609	1.45	1.748	2.11	1.845	1.338	1.309	1.645	1.528	1.52	1.583	1.761	1.645
pos_261	(1'R)-Nepetalic acid	（1'R）-壬二酸	metab_1790	B(ii)	-	-	HMDB0036117	M+Na, M+CH3OH+H, M+H-H2O	C10H16O3	10.1665	-	-	pos	-	-	-	-	Lipids and lipid-like molecules	Prenol lipids	207.098	0.238144	0	55	-5.42203	21651-54-7	Monoterpenoids	3.989	3.987	4.074	4.074	4.077	3.941	3.883	3.926	3.755	3.944	3.827	3.97	4.088	3.977	3.968	3.9	4.002	3.934	4.035	3.851	3.882
pos_1160	Fluorodeoxyuridine monophosphate	单磷酸氟脱氧尿苷	metab_180	B(ii)	-	-	HMDB0258002	M+H-2H2O	C9H12FN2O8P	1.4303	-	-	pos	-	-	-	-	Organoheterocyclic compounds	Diazines	291.021	0.0933547	0	44.9	9.2682	-	Pyrimidines and pyrimidine derivatives	0.5281	0.5422	2.182	1.666	1.222	1.486	1.374	2.107	1.419	2.327	2.095	2.014	1.959	1.887	2.274	1.97	2.227	1.298	1.874	1.932	1.857
pos_262	N-Phenylpyrimidin-2-amine	N -苯基嘧啶- 2 -胺	metab_1801	B(ii)	-	-	HMDB0246981	M+, M+Na, M+NH4	C10H9N3	9.0525	-	-	pos	-	-	-	-	Benzenoids	Benzene and substituted derivatives	189.112	0.0265161	0	80.8	-9.51714	-	Aniline and substituted anilines	3.137	3.083	2.907	3.139	3.237	3.099	3.164	3.016	3.157	2.956	3.143	3.11	3.325	3.263	3.181	3.092	3.161	2.972	3.04	3.052	3.063
pos_2621	Nonate	诺纳特	metab_1803	B(ii)	-	-	HMDB0011717	M+H-H2O	C9H16O4	7.1468	-	-	pos	-	-	-	-	Lipids and lipid-like molecules	Fatty Acyls	171.102	0.0541374	0	38.5	2.96191	-	Fatty acids and conjugates	1.907	1.81	2.05	2.082	2.174	2.11	2.031	2.057	1.962	2.028	2.06	2.075	2.187	2.049	2.155	2.092	2.176	2.039	2.051	2.054	2.092
pos_2627	4-Methyl-1-phenyl-2-pentanone	4 -甲基- 1 -苯基- 2 -戊酮	metab_1809	B(ii)	-	-	HMDB0031569	M+H-H2O	C12H16O	7.1353	-	-	pos	-	-	-	-	Benzenoids	Benzene and substituted derivatives	159.117	0.0515079	0	97.2	-1.23942	5349-62-2	Not Available	1.862	1.823	2	2.103	2.189	2.076	2.021	2.136	2.145	2.014	2.201	2.099	2.232	2.098	2.202	2.178	2.235	2.068	2.14	2.099	2.135
pos_2631	Baohuoside VI	宝藿苷Ⅵ	metab_1814	B(ii)	-	-	HMDB0248862	M+Na	C39H50O19	7.112	-	-	pos	-	-	-	-	Phenylpropanoids and polyketides	Flavonoids	845.286	0.0641738	0	33.4	2.63656	-	Flavonoid glycosides	2.785	1.632	2.082	2.534	2.482	2.25	2.477	2.363	3.077	2.684	2.942	2.601	2.16	2.209	2.505	2.79	2.561	2.586	2.653	2.634	2.598
pos_2638	Arctinal	牛蒡子醛	metab_1821	B(ii)	-	-	HMDB0302302	M+H	C12H8OS2	7.077	-	-	pos	-	-	-	-	Organoheterocyclic compounds	Bi- and oligothiophenes	233.009	0.0172814	0	38.3	1.88822	-	Not Available	2.608	2.863	1.83	2.513	2.668	2.319	2.285	1.977	3.009	2.529	2.823	1.938	2.401	2.834	2.718	2.564	2.684	2.008	2.643	2.628	2.636
pos_2659	Darexaban glucuronide	达雷沙班葡糖苷酸	metab_1844	B(ii)	-	-	HMDB0249922	M+H	C33H38N4O10	6.9371	-	-	pos	-	-	-	-	Organic oxygen compounds	Organooxygen compounds	651.26	0.0282901	0	55.3	-9.21963	-	Carbohydrates and carbohydrate conjugates	2.685	2.923	2.478	2.823	2.398	2.819	2.542	2.602	2.601	2.247	2.41	2.262	2.611	2.038	2.422	2.634	2.561	2.568	2.582	2.607	2.592
pos_2663	Obacunone 17-O-beta-D-glucoside	奥巴库农17-O-β-D-葡萄糖苷	metab_1849	B(ii)	-	-	HMDB0302542	M+ACN+Na	C32H42O13	6.9257	-	-	pos	-	-	-	-	Lipids and lipid-like molecules	Prenol lipids	698.277	0.089965	0	35.1	-1.32683	-	Triterpenoids	2.437	2.512	1.874	2.376	2.484	2.427	2.037	2.085	2.735	2.412	2.625	2.159	2.197	2.125	2.313	2.579	2.188	1.886	2.402	2.407	2.336
pos_2666	2-(4-chlorophenyl)-6-[4-(3-fluorobenzoyl)piperazin-1-yl]pyridazin-3-one	2-（4-氯苯基）-6-[4-（3-氟苯甲酰基）哌嗪-1-基]哒嗪-3-酮	metab_1852	B(i)	-	-	-	M+H	C21H18ClFN4O2	6.9136	-	-	pos	-	-	-	-	-	-	413.118	0.140554	72.5	0	1.52695	-	-	1.982	3.054	0.4477	1.985	1.799	1.961	0.4741	0.4552	1.904	0.5446	2.283	0.4921	1.645	1.559	0.8899	1.242	1.957	0.4834	1.94	1.994	2.06
pos_267	DN-isobutylamide	DN -异丁酰胺	metab_1856	B(ii)	-	-	HMDB0251551	M+H-H2O, M+H, M+CH3OH+H	C20H32N6O5	11.2541	-	-	pos	-	-	-	-	Organic acids and derivatives	Carboxylic acids and derivatives	469.276	0.26396	0	40.9	-1.15083	-	Amino acids, peptides, and analogues	1.98	1.743	2.034	1.87	2.142	1.951	1.933	1.837	1.921	2.098	1.827	1.986	1.97	1.805	2.036	1.987	1.896	2.038	1.857	2.027	2.092
pos_2675	1,10-Epoxygermacrone	1，10 -环氧大黄素	metab_1862	B(ii)	-	-	HMDB0035408	M+H	C15H22O2	6.8665	-	-	pos	-	-	-	-	Lipids and lipid-like molecules	Prenol lipids	235.17	0.0337995	0	30.6	1.92524	52061-45-7	Sesquiterpenoids	2.16	2.18	2.057	2.376	2.546	2.117	1.921	1.859	2.648	2.038	2.547	2.168	2.449	2.518	2.336	2.141	2.16	2.004	2.341	2.346	2.318
pos_2710	Gly Phe Asn Thr Phe	-	metab_1902	B(i)	-	-	-	M+H	C28H36N6O8	6.6547	-	-	pos	-	-	-	-	-	-	585.27	0.142315	59	0	5.19291	-	-	2.488	2.792	0.7455	1.853	1.737	2.466	1.655	0.755	1.963	2.21	2.243	0.8848	1.816	2.621	2.562	2.309	2.028	1.45	2.177	2.265	2.3
pos_2718	Methyl (R)-9-hydroxy-10-undecene-5,7-diynoate glucoside	甲基（R）-9-羟基-10-十一烯-5,7-二炔酸葡萄糖苷	metab_1910	B(ii)	-	-	HMDB0040895	M+2Na-H	C18H24O8	6.5955	-	-	pos	-	-	-	-	Lipids and lipid-like molecules	Fatty Acyls	413.119	0.172414	0	41.6	2.49972	152141-44-1	Fatty acyl glycosides	1.944	2.721	0.2803	1.908	1.95	1.677	0.3	0.2859	2.121	0.8103	2.316	0.6842	1.887	1.998	1.655	1.871	1.973	0.3069	1.862	2.012	1.962
pos_2719	Phenyl vinyl sulfide	苯基乙烯基硫醚	metab_1911	B(ii)	-	-	HMDB0031825	M+CH3OH+H	C8H8S	6.5955	-	-	pos	-	-	-	-	Organosulfur compounds	Thioethers	169.067	0.157772	0	31.9	-9.84598	1822-73-7	Aryl thioethers	2.353	2.575	1.866	2.291	2.432	2.305	1.994	1.946	2.5	2.27	2.657	1.768	2.355	2.568	2.549	2.522	2.389	2.019	2.289	2.407	2.42
pos_2772	Osmanthuside H	桂花苷H	metab_1970	B(i)	-	-	-	M+K	C19H28O11	6.2984	-	-	pos	-	-	-	-	-	-	471.128	0.0246787	34.9	0	4.0438	-	-	3.27	3.372	3.116	3.288	3.614	3.181	2.779	2.669	3.464	3.266	3.712	2.989	3.596	3.627	3.503	3.463	3.3	2.703	3.36	3.373	3.381
pos_2800	Cheirotoxol	雪罗素	metab_2002	B(ii)	-	-	HMDB0030076	M+ACN+Na	C35H54O15	6.1312	-	-	pos	-	-	-	-	Lipids and lipid-like molecules	Steroids and steroid derivatives	778.361	0.0455049	0	46.5	-1.89695	-	Steroid lactones	3.342	3.777	2.266	2.68	2.876	3.082	2.307	1.328	3.007	2.717	2.977	2.098	2.518	3.369	3.2	2.957	2.771	1.803	3.014	3.042	3.004
pos_2804	(-)-1-Methylpropyl 1-propenyl disulfide	（-）-1-甲基丙基-1-丙烯基二硫化物	metab_2006	B(ii)	-	-	HMDB0034426	M+Na	C7H14S2	6.1194	-	-	pos	-	-	-	-	Organosulfur compounds	Organic disulfides	185.042	0.1551	0	56.3	-3.97185	-	Not Available	1.475	1.26	1.085	1.577	1.384	0.8889	1.479	0.6201	1.697	1.344	1.836	1.395	1.97	1.74	1.848	1.704	1.533	1.3	1.483	1.604	1.602
pos_2811	8-Hydroxy-4(6)-lactarene-5,14-diol	8-羟基-4（6）-乳芳烃-5,14-二醇	metab_2014	B(ii)	-	-	HMDB0035780	M+H-H2O	C15H26O3	6.0715	-	-	pos	-	-	-	-	Organic oxygen compounds	Organooxygen compounds	237.185	0.0483775	0	36.8	0.821889	-	Alcohols and polyols	3.597	3.799	2.924	2.786	3.232	2.704	2.889	1.941	3.426	3.427	3.317	2.836	3.076	3.554	3.352	3.233	2.691	1.882	3.294	3.253	3.265
pos_2874	Tetrahydrotriazine	-	metab_2083	B(ii)	-	-	HMDB0258910	M+	C3H7N3	5.8435	-	-	pos	-	-	-	-	Organoheterocyclic compounds	Triazines	85.0643	0.0594	0	46.9	3.39301	-	1,2,3-triazines	2.114	2.201	1.247	1.834	1.917	2.172	2.037	1.67	1.955	1.931	2.136	1.405	1.503	1.93	2.099	2.135	2.053	1.972	1.992	2.019	2.043
pos_2879	Butanoic acid, 3-((2-naphthalenylsulfonyl)amino)-4-oxo-4-((2-phenylethyl)amino)-, (S)-	丁酸，3-（（2-萘磺酰基）氨基）-4-氧代-4-（（2-苯乙基）氨基）-，（S）-	metab_2088	B(ii)	-	-	HMDB0245246	M+ACN+H	C22H22N2O5S	5.8195	-	-	pos	-	-	-	-	Organic acids and derivatives	Carboxylic acids and derivatives	468.158	0.0641733	0	31.7	-2.78414	-	Amino acids, peptides, and analogues	2.636	2.964	1.625	2.095	2.039	1.62	2.36	2.173	2.529	2.322	2.512	1.82	1.578	2.628	2.324	2.455	2.485	1.931	2.347	2.387	2.401
pos_2880	Lucuminamide	谷氨酰胺	metab_2090	B(ii)	-	-	HMDB0031697	M+H-2H2O	C19H27NO11	5.8195	-	-	pos	-	-	-	-	Organic oxygen compounds	Organooxygen compounds	410.148	0.174037	0	56.2	6.79512	-	Carbohydrates and carbohydrate conjugates	2.378	2.572	2.683	2.339	2.147	2.3	1.799	2.495	2.716	2.525	2.658	2.675	2.328	2.367	2.215	2.627	2.412	2.642	2.406	2.524	2.557
pos_2883	7-Hydroxy-6-methyl-2H-1-benzopyran-2-one	7 -羟基- 6 -甲基- 2H - 1 -苯并吡喃- 2 -酮	metab_2093	B(ii)	-	-	HMDB0032990	2M+H	C10H8O3	5.8077	-	-	pos	-	-	-	-	Phenylpropanoids and polyketides	Coumarins and derivatives	353.104	0.0641409	0	87.6	5.05441	53811-56-6	Hydroxycoumarins	1.999	1.797	2.246	1.967	2.047	2.165	1.969	2.33	2.364	2.268	2.345	2.236	2.037	2.034	1.903	2.44	2.397	2.36	2.186	2.224	2.241
pos_2892	Methyl (R)-3-methyl-2-oxopentanoate	（R）-3-甲基-2-氧代戊酸甲酯	metab_2103	B(ii)	-	-	LMFA07010933;HMDB0037114	2M+K	C7H12O3	5.7956	-	-	pos	-	-	-	-	Lipids and lipid-like molecules	Fatty Acyls	327.123	0.0905996	0	84.8	8.81769	3682-42-6	Fatty acid esters	2.722	2.605	2.849	2.573	2.548	2.871	2.591	2.853	2.962	2.94	2.811	2.817	2.519	2.573	2.665	2.894	2.789	2.954	2.766	2.833	2.838
pos_2895	Napsagatran	纳普萨加特兰	metab_2106	B(ii)	-	-	HMDB0255457	M+H-2H2O	C26H34N6O6S	5.7717	-	-	pos	-	-	-	-	Organic acids and derivatives	Peptidomimetics	523.211	0.10933	0	46.3	-1.41687	-	Peptoid-peptide hybrids	3.2	3.553	2.868	2.91	3.106	3.022	2.604	2.889	3.213	3.033	3.089	2.877	2.907	3.204	2.983	3.07	3.02	3.116	3.047	3.128	3.136
pos_2898	11-Hydroxy-9-tridecenoic acid	11 -羟基- 9 -十三碳烯酸	metab_2109	B(ii)	-	-	LMFA01050437;HMDB0035881	M+H-H2O	C13H24O3	5.7717	-	-	pos	-	-	-	-	Lipids and lipid-like molecules	Fatty Acyls	211.17	0.0151492	0	66.9	1.81338	105798-56-9	Fatty acids and conjugates	3.239	3.7	1.728	0.8454	3.047	2.879	1.554	0.4308	1.17	0.5177	1.856	1.23	2.032	2.764	2.868	2.133	1.625	0.5878	2.792	2.798	2.785
pos_1189	2-Acetylacteoside	2-乙酰Acteoside	metab_211	B(ii)	-	-	HMDB0245529	M+H+Na	C31H38O16	2.5564	-	-	pos	-	-	-	-	Phenylpropanoids and polyketides	Flavonoids	345.104	0.101814	0	31.9	-6.93846	-	Flavonoid glycosides	3.573	3.165	3.843	3.552	3.61	3.986	3.867	3.857	3.913	4.03	3.836	3.916	3.499	3.318	3.681	3.684	3.789	4.011	3.744	3.833	3.793
pos_29	[3-[2,3-Dihydroxypropoxy(hydroxy)phosphoryl]oxy-2-hydroxypropyl] hexadecanoate	[3-[2,3-二羟基丙氧基（羟基）磷酰基]氧-2-羟丙基]十六酸酯	metab_2111	B(ii)	-	-	HMDB0242118	M+H, M+NH4, 2M+NH4, 2M+Na, M+H-H2O	C22H45O9P	9.0525	-	-	pos	-	-	-	-	Lipids and lipid-like molecules	Glycerophospholipids	485.291	0.0337599	0	42.2	6.49879	-	Glycerophosphoglycerols	5.108	5.018	4.996	5.087	5.066	5.085	5.057	5.038	5.123	5.072	5.169	4.986	5.129	5.192	5.2	5.115	5.14	5.06	4.932	4.955	4.959
pos_2909	Oxalic acid dibutyl ester	草酸二丁酯	metab_2122	B(ii)	-	-	HMDB0040196	M+H-H2O	C10H18O4	5.736	-	-	pos	-	-	-	-	Organic acids and derivatives	Carboxylic acids and derivatives	185.115	0.159259	0	27.9	-9.71181	2050-60-4	Dicarboxylic acids and derivatives	1.399	1.703	1.514	1.639	1.476	1.263	1.263	1.37	1.412	1.417	1.639	1.273	1.576	1.689	1.512	1.597	1.55	1.415	1.245	1.326	1.379
pos_2933	Sialyl Lewis x antigen	-	metab_2149	B(ii)	-	-	HMDB0258280	M+H-2H2O	C31H52N2O23	5.6169	-	-	pos	-	-	-	-	Organic oxygen compounds	Organooxygen compounds	785.281	0.0946348	0	34.8	-1.66733	-	Carbohydrates and carbohydrate conjugates	3.09	3.009	3.357	2.969	2.806	3.285	2.919	3.348	3.367	3.367	3.19	3.321	2.914	2.805	2.764	3.24	3.13	3.354	3.185	3.246	3.17
pos_2941	3-(N-Maleimidopropionyl)biocytin	3-（N-马来酰亚胺丙基）生物胞素	metab_2158	B(ii)	-	-	HMDB0245790	M+NH4	C23H33N5O7S	5.5811	-	-	pos	-	-	-	-	Organic acids and derivatives	Peptidomimetics	541.246	0.0766929	0	32.3	4.75811	-	Hybrid peptides	3.531	4.091	2.142	3.436	3.012	3.46	2.655	2.345	2.986	2.817	3.108	2.568	2.47	3.405	3.158	2.929	3.407	2.844	3.268	3.332	3.32
pos_2945	6a, 3'-p-Dihydroxypaclitaxel	6a，3 ' - P -二羟基紫杉醇	metab_2162	B(ii)	-	-	HMDB0060795	M+NH4	C45H47NO18	5.5574	-	-	pos	-	-	-	-	Benzenoids	Benzene and substituted derivatives	907.307	0.0532876	0	33	-6.73275	-	Benzoic acids and derivatives	3.217	2.114	3.568	3.183	2.684	3.197	3.134	3.358	3.406	3.417	2.985	3.522	3.14	2.91	2.808	3.321	3.212	3.462	3.262	3.293	3.248
pos_2953	7-Methyl-2'-deoxyguanosine-3'-monophosphate	7 -甲基- 2 ' -脱氧鸟苷- 3 ' -单磷酸	metab_2171	B(ii)	-	-	HMDB0247809	M+	C11H18N5O7P	5.5336	-	-	pos	-	-	-	-	Nucleosides, nucleotides, and analogues	Ribonucleoside 3''-phosphates	363.093	0.127586	0	34.5	-2.76022	-	Not Available	2.574	1.475	1.65	1.996	2.049	2.169	2.41	1.613	2.37	1.981	2.482	1.357	1.586	2.052	2.199	2.514	2.102	2.053	2.183	2.142	2.25
pos_2956	2-(3-Hydroxyphenyl)ethanol 1'-glucoside	2-（3-羟基苯基）乙醇1’-葡萄糖苷	metab_2174	B(ii)	-	-	HMDB0038332	M+H-2H2O	C14H20O7	5.5219	-	-	pos	-	-	-	-	Organic oxygen compounds	Organooxygen compounds	265.107	0.0352228	0	38.3	1.38686	-	Carbohydrates and carbohydrate conjugates	1.589	1.418	2.194	1.603	1.505	2.198	1.147	2.612	2.083	2.032	1.633	2.08	1.337	0.6177	0.6005	1.991	1.784	2.309	2.078	2.065	2.048
pos_2960	Acetamide, N-(p-amidino-alpha-(piperidinocarbonyl)phenethyl)-2-(2-naphthylsulfonamido)-, (S)-	乙酰胺，N-（对氨基-α-（哌啶羰基）苯乙基）-2-（2-萘磺酰胺基）-（S）-	metab_2179	B(ii)	-	-	HMDB0247902	M+ACN+Na	C27H31N5O4S	5.4982	-	-	pos	-	-	-	-	Organic acids and derivatives	Carboxylic acids and derivatives	585.229	0.0487058	0	37.8	6.69042	-	Amino acids, peptides, and analogues	2.311	2.152	2.226	2.033	1.922	2.256	2.084	2.21	2.453	2.244	2.316	2.294	2.007	2.198	1.936	2.264	2.112	2.36	2.254	2.294	2.264
pos_2969	Herierin III	猴头菌素Ⅲ	metab_2188	B(ii)	-	-	HMDB0038760	M+H-H2O	C8H10O4	5.4749	-	-	pos	-	-	-	-	Organoheterocyclic compounds	Pyrans	153.054	0.1208	0	73.7	-1.11143	131123-56-3	Pyranones and derivatives	1.41	0.2561	2.09	1.416	1.052	2.096	1.467	2.265	2.017	2.22	1.738	1.887	0.4663	0.2519	1.063	1.798	1.698	2.156	1.802	1.857	1.906
pos_2971	Heterophyllin	竹节参苷	metab_2191	B(ii)	-	-	HMDB0034660;LMPK12110929	M+ACN+Na	C30H32O7	5.4631	-	-	pos	-	-	-	-	Phenylpropanoids and polyketides	Flavonoids	568.226	0.0433481	0	78.1	-8.47976	-	Flavones	1.642	2.009	2.41	1.875	2.017	2.534	1.822	2.476	2.514	2.258	2.285	2.125	1.907	1.605	1.401	2.173	2.152	2.356	2.175	2.2	2.164
pos_2977	Bucolome	丁环己巴比妥	metab_2197	B(ii)	-	-	HMDB0249422	2M+H	C14H22N2O3	5.3807	-	-	pos	-	-	-	-	Organoheterocyclic compounds	Diazines	533.334	0.219676	0	36.7	0.927202	-	Pyrimidines and pyrimidine derivatives	0.3885	0.4004	1.915	1.698	2.283	0.365	1.075	1.56	1.981	0.3729	3.112	1.595	2.063	2.198	1.776	2.196	1.218	1.214	1.933	2.096	2.12
pos_2982	1H-Imidazole, 2-(2-benzofuranyl)-4,5-dihydro-	1H咪唑，2-（2-苯并呋喃基）-4,5-二氢-	metab_2203	B(ii)	-	-	HMDB0245038	M+2Na-H	C11H10N2O	5.3456	-	-	pos	-	-	-	-	Organoheterocyclic compounds	Benzofurans	231.051	0.0198488	0	36.5	1.31177	-	Not Available	2.571	2.61	2.408	2.52	2.248	2.346	2.24	2.376	2.574	2.308	2.463	2.374	2.152	2.389	2.342	2.275	2.388	2.338	2.425	2.41	2.424
pos_2996	Benzyl alcohol beta-D-rutinoside	苯甲醇β - D -芸香糖苷	metab_2218	B(ii)	-	-	HMDB0303057	M+Na	C19H28O10	5.2411	-	-	pos	-	-	-	-	Organic oxygen compounds	Organooxygen compounds	439.16	0.12926	0	46.7	6.09495	-	Carbohydrates and carbohydrate conjugates	1.684	1.802	1.011	2.044	1.796	2.18	1.273	0.7612	1.93	0.7816	2.033	1.104	1.898	2.166	1.955	1.821	1.727	1.134	1.779	1.781	1.68
pos_3001	Riesling acetal	雷司令缩醛	metab_2226	B(ii)	-	-	HMDB0037562	M+H-H2O	C13H22O3	5.2293	-	-	pos	-	-	-	-	Organoheterocyclic compounds	Tetrahydrofurans	209.154	0.0699117	0	72.7	0.697772	-	Not Available	2.727	3.188	1.607	1.678	2.174	2.551	1.844	1.45	2.033	1.653	2.143	1.503	1.72	2.635	2.652	2.152	2.179	1.512	2.343	2.398	2.35
pos_3018	Ustiloxin D	稻曲病菌毒素D	metab_2244	B(ii)	-	-	HMDB0041054	M+2Na-H	C23H34N4O8	5.0668	-	-	pos	-	-	-	-	Organic acids and derivatives	Carboxylic acids and derivatives	539.21	0.131138	0	32.2	1.68265	158243-18-6	Amino acids, peptides, and analogues	2.942	3.126	2.517	2.51	2.564	2.896	2.658	2.516	3.11	2.807	2.955	2.677	2.559	3.052	2.883	2.796	2.808	2.652	2.747	2.862	2.82
pos_3025	Taraxinic acid glucosyl ester	蒲公英酸葡萄糖基酯	metab_2252	B(ii)	-	-	HMDB0035249	M+CH3OH+H	C21H28O9	5.0436	-	-	pos	-	-	-	-	Lipids and lipid-like molecules	Prenol lipids	457.207	0.0976104	0	70.3	0.0942141	75911-14-7	Terpene lactones	2.721	3.06	1.798	1.846	2.224	2.704	1.899	1.351	1.665	2.02	1.762	1.712	2.099	2.44	2.366	2.269	2.24	1.595	2.366	2.329	2.413
pos_3028	Cichorioside K	菊苣萜苷K	metab_2255	B(ii)	-	-	HMDB0302057	M+CH3OH+H	C21H26O10	5.0323	-	-	pos	-	-	-	-	Organic oxygen compounds	Organooxygen compounds	471.185	0.0327034	0	46.6	-1.79915	-	Carbohydrates and carbohydrate conjugates	2.41	2.994	1.392	2.1	2.254	2.497	1.485	1.2	1.936	1.444	2.019	1.252	1.542	2.14	2.181	1.911	1.835	1.271	2.248	2.22	2.23
pos_3033	Ptelatoside A	-	metab_2261	B(ii)	-	-	HMDB0032600;HMDB0034447	M+H-H2O	C19H26O10	5.0206	-	-	pos	-	-	-	-	Organic oxygen compounds	Organooxygen compounds	397.147	0.115335	0	45.2	-5.33661	90852-99-6;90899-20-0	Carbohydrates and carbohydrate conjugates	1.957	1.646	2.175	1.896	1.64	2.281	2.334	2.613	2.493	2.284	2.208	1.912	1.82	1.79	1.801	2.448	2.12	2.015	2.124	2.178	2.224
pos_3037	Deoxycholylarginine	脱氧胆酰精氨酸	metab_2265	B(ii)	-	-	HMDB0242418	M+NH4	C30H52N4O5	4.9973	-	-	pos	-	-	-	-	Not Available	Not Available	566.429	0.0689648	0	36.5	1.9805	-	Not Available	1.79	1.792	2.1	1.977	2.201	1.968	1.875	1.934	1.761	1.971	1.804	1.972	2.092	1.932	2.009	1.842	1.981	1.885	1.943	1.975	1.916
pos_3042	Propentofylline	丙烯茶碱	metab_2271	B(ii)	-	-	HMDB0256822	M+H-H2O	C15H22N4O3	4.9858	-	-	pos	-	-	-	-	Organoheterocyclic compounds	Imidazopyrimidines	289.165	0.013656	0	30.2	-3.51481	-	Purines and purine derivatives	4.178	4.479	3.338	3.484	3.685	3.971	3.355	2.313	3.067	3.099	3.322	3.073	3.271	3.878	3.826	3.45	3.526	3.195	3.755	3.746	3.758
pos_3051	(3-Aminopropyl)(n-butyl)phosphinic acid	（3-氨丙基）（正丁基）膦酸	metab_2281	B(ii)	-	-	HMDB0249860	M+ACN+Na	C7H18NO2P	4.9396	-	-	pos	-	-	-	-	Organophosphorus compounds	Not Available	243.124	0.048506	0	39.1	2.0598	-	Not Available	1.794	1.584	1.631	1.441	1.518	1.51	1.855	1.658	1.751	1.717	1.801	1.65	1.425	1.706	1.807	1.795	1.781	1.688	1.68	1.703	1.722
pos_3077	ZINOSTATIN	锌抑素	metab_2309	B(ii)	-	-	HMDB0260026	M+	C35H35NO12	4.7663	-	-	pos	-	-	-	-	Organic oxygen compounds	Organooxygen compounds	661.21	0.137554	0	38.5	-8.69078	-	Carbohydrates and carbohydrate conjugates	3.173	2.885	2.41	2.504	2.641	2.842	2.87	2.6	2.806	2.617	2.939	2.533	2.617	2.902	2.724	2.859	2.738	2.799	2.708	2.826	2.798
pos_3078	2-(5-chloro-2-thiophen-2-ylindol-1-yl)-N-(2-morpholin-4-ylethyl)acetamide	2-（5-氯-2-噻吩-2-基吲哚-1-基）-N-（2-吗啉-4-基乙基）乙酰胺	metab_2310	B(i)	-	-	-	M+H	C20H22ClN3O2S	4.7663	-	-	pos	-	-	-	-	-	-	404.123	0.149325	64.2	0	7.94352	-	-	2.691	2.661	2.643	2.685	2.519	2.807	2.905	2.924	2.855	2.731	2.68	2.809	2.64	2.692	2.572	2.69	2.669	2.911	2.666	2.755	2.797
pos_3079	Cyanidin 3-O-(2'-xylosyl-6'-(6''-p-hydroxybenzoyl-glucosyl)-galactoside)	-	metab_2311	B(ii)	-	-	-	M+H-H2O	C39H43O22+	4.7548	-	-	pos	-	-	-	-	-	-	846.216	0.0181725	0	36.1	-5.58206	-	-	4.124	4.406	4.163	4.445	4.211	4.237	4.321	4.381	3.937	4.189	3.96	4.157	4.194	4.207	4.121	4	4.218	4.208	4.227	4.214	4.213
pos_3083	(5alpha,8beta,9beta)-5,9-Epoxy-3,6-megastigmadien-8-ol	（5alpha，8beta，9beta）-5,9-环氧-3,6-巨豆二烯-8-醇	metab_2316	B(ii)	-	-	HMDB0034672	M+H	C13H20O2	4.7318	-	-	pos	-	-	-	-	Organoheterocyclic compounds	Benzopyrans	209.154	0.0597881	0	50.2	1.33189	69927-26-0	Not Available	2.939	3.547	1.534	2.124	2.244	3.044	2.127	1.478	2.304	2.07	2.266	1.929	1.301	2.454	2.481	2.367	2.276	1.978	2.624	2.647	2.676
pos_3095	Thr Val Phe Asp	-	metab_2329	B(i)	-	-	-	M+H	C22H32N4O8	4.6514	-	-	pos	-	-	-	-	-	-	481.231	0.0767387	36.2	0	3.48311	-	-	2.499	2.337	2.498	2.506	2.404	2.766	2.333	2.193	2.665	2.195	2.866	2.381	2.747	2.806	2.657	2.658	2.729	2.128	2.511	2.533	2.575
pos_3096	Ile Glu Leu	异亮氨酸 谷氨酸 亮氨酸	metab_2330	B(i)	-	-	-	M+H	C17H31N3O6	4.6514	-	-	pos	-	-	-	-	-	-	374.229	0.194993	62.3	0	0.79289	-	-	1.996	2.295	2	1.897	2.069	2.219	1.83	1.736	1.935	2.072	2.033	2.102	2.197	2.081	2.054	1.989	2.068	1.805	1.971	2.013	2.128
pos_3107	(R)-Rutaretin 1'-(6''-sinapoylglucoside)	（R） -芦丁1’-（6’’-芥子酰基葡萄糖苷）	metab_2343	B(ii)	-	-	HMDB0039041	M+H	C31H34O14	4.6056	-	-	pos	-	-	-	-	Phenylpropanoids and polyketides	Coumarins and derivatives	631.202	0.0282907	0	34	0.157732	-	Furanocoumarins	3.707	3.682	3.491	3.732	3.624	3.886	3.648	3.716	3.744	3.402	3.814	3.462	3.747	3.619	3.57	3.84	3.684	3.654	3.678	3.682	3.701
pos_3111	Crocin 5	藏红花素5	metab_2348	B(ii)	-	-	HMDB0250541	M+H	C22H26O9	4.5943	-	-	pos	-	-	-	-	Lipids and lipid-like molecules	Fatty Acyls	435.166	0.201241	0	54.3	3.543	-	Fatty acyl glycosides	2.591	2.413	2.486	2.224	1.559	2.655	2.438	2.484	2.785	2.183	2.538	2.514	1.649	2.381	2.242	2.533	2.85	2.844	2.372	2.53	2.538
pos_3112	True blue	真蓝	metab_2349	B(ii)	-	-	HMDB0259305	M+H-H2O	C20H16N4O2	4.5943	-	-	pos	-	-	-	-	Organoheterocyclic compounds	Benzofurans	327.123	0.153051	0	51.3	-3.52773	-	Not Available	2.69	2.597	2.356	2.323	2.341	2.502	2.504	2.447	2.919	2.727	2.585	2.546	2.095	2.347	2.431	2.599	2.437	2.434	2.533	2.567	2.658
pos_3113	(S,E)-2-(5-Hydroxy-8,9-dihydro-5H-benzo[7]annulen-6(7H)-ylidene)acetic acid	（S，E）-2-（5-羟基-8,9-二氢-5H-苯并[7]环烯-6（7H）-亚基）乙酸	metab_2350	B(ii)	-	-	HMDB0250015	M+H	C13H14O3	4.5943	-	-	pos	-	-	-	-	Benzenoids	Not Available	219.102	0.0664397	0	55.4	1.50475	-	Not Available	3.309	3.168	3.145	3.089	3.006	3.338	3.165	3.225	3.427	2.946	3.41	3.071	3.076	3.18	3.047	3.407	3.244	3.481	3.227	3.264	3.285
pos_3121	(R)-3,4-Dihydro-6,8-dihydroxy-3-methyl-1H-2-benzopyran-1-one	（R） -3,4-二氢-6,8-二羟基-3-甲基-1H-2-苯并吡喃-1-酮	metab_2359	B(ii)	-	-	HMDB0303675	2M+H	C10H10O4	4.5028	-	-	pos	-	-	-	-	Benzenoids	Benzene and substituted derivatives	389.125	0.0806826	0	30.2	3.78252	-	Benzoic acids and derivatives	2.298	2.104	2.06	2.229	2.108	2.312	2.158	2.065	2.453	2.192	2.493	2.264	2.224	2.37	2.418	2.503	2.244	2.158	2.22	2.288	2.271
pos_3138	(2S)-2-[[(2R,3S,4R,5R)-5-(6-Aminopurin-9-yl)-3,4-dihydroxyoxolan-2-yl]methylamino]-4-sulfanylbutanoic acid	（2S）-2-[[（2R，3S，4R，5R）-5-（6-氨基嘌呤-9-基）-3,4-二羟基氧代戊烷-2-基]甲胺基]-4-磺酰基丁酸	metab_2377	B(ii)	-	-	HMDB0258158	M+NH4	C14H20N6O5S	4.3088	-	-	pos	-	-	-	-	Nucleosides, nucleotides, and analogues	5''-deoxyribonucleosides	402.157	0.15056	0	36.2	5.42279	-	Not Available	2.652	3.034	2.027	1.248	2.009	2.364	1.508	2.02	2.426	1.66	1.698	1.968	0.7225	2.242	2.048	1.736	1.911	2.264	2.154	2.283	2.254
pos_1212	S-Nitroso-N-acetylcysteine	S-亚硝基-N-乙酰半胱氨酸	metab_238	B(ii)	-	-	HMDB0257414	2M+Na	C5H8N2O4S	2.7026	-	-	pos	-	-	-	-	Organic acids and derivatives	Carboxylic acids and derivatives	407.033	0.149044	0	30.5	6.08627	-	Amino acids, peptides, and analogues	2.955	3.558	3.053	2.885	2.881	2.179	1.978	1.776	2.674	3.087	2.702	2.705	2.472	2.872	2.673	1.787	2.582	1.808	2.617	2.715	2.745
pos_3148	Arginyl-glycyl-glutamyl-serine	精氨酰-甘氨酰-谷氨酰-丝氨酸	metab_2388	B(ii)	-	-	HMDB0248575	M+CH3OH+H	C16H29N7O8	4.252	-	-	pos	-	-	-	-	Organic acids and derivatives	Carboxylic acids and derivatives	480.244	0.0407644	0	42.4	7.25619	-	Amino acids, peptides, and analogues	2.637	2.058	0.8262	2.861	2.821	3.224	1.722	0.00111	2.808	0.03366	2.993	0.008689	2.985	3.153	2.999	2.877	2.758	0.7807	2.651	2.683	2.656
pos_3152	Phytosphingosine-1-P	植物鞘氨醇- 1 - P	metab_2393	B(ii)	-	-	HMDB0012280	M+H-2H2O	C18H40NO6P	4.2291	-	-	pos	-	-	-	-	Lipids and lipid-like molecules	Sphingolipids	362.242	0.0938011	0	47.3	-9.76125	-	Phosphosphingolipids	3.078	3.109	3.2	3.269	3.277	3.204	3.074	3.123	2.906	3.191	2.992	3.148	3.252	3.081	3.193	3.093	3.15	3.014	3.173	3.114	3.097
pos_3156	(2S)-2-Amino-3-[4-[(2S)-2-amino-3-(1H-indol-3-yl)propanoyl]oxyphenyl]propanoic acid	（2S）-2-氨基-3-[4-[（2S）-2-氨基-3-（1H-吲哚-3-基）丙酰基]氧基苯基]丙酸	metab_2397	B(ii)	-	-	HMDB0258058	M+Na	C20H21N3O4	4.1948	-	-	pos	-	-	-	-	Organoheterocyclic compounds	Pyridines and derivatives	390.14	0.257005	0	57.3	-7.5285	-	Phenylpyridines	1.022	0.06943	0.04615	0.05134	0.05328	0.5011	1.625	1.511	1.933	1.353	1.517	1.164	0.05223	1.393	1.308	2.152	1.645	0.8085	0.998	1.17	1.207
pos_3157	Calcein Blue	钙黄绿素蓝	metab_2398	B(ii)	-	-	HMDB0249539	2M+NH4	C15H15NO7	4.1837	-	-	pos	-	-	-	-	Phenylpropanoids and polyketides	Coumarins and derivatives	660.2	0.0164799	0	32.3	-6.05321	-	Hydroxycoumarins	3.799	3.507	3.404	3.644	3.359	3.633	3.685	3.619	3.689	3.668	3.633	3.55	3.382	3.576	3.459	3.487	3.564	3.789	3.604	3.612	3.619
pos_3160	Peonidin 3-(6''-p-coumaroyl-glucoside) 5-glucoside	芍药苷3-（6’’-对香豆酰基葡萄糖苷）5-葡萄糖苷	metab_2402	B(ii)	-	-	HMDB0038092	M+H-H2O	C38H41O17+	4.1382	-	-	pos	-	-	-	-	Lipids and lipid-like molecules	Prenol lipids	752.235	0.180039	0	36.5	4.78528	51939-65-2	Terpene glycosides	2.004	0.3173	1.54	1.891	2.015	1.938	1.991	1.726	2.102	1.812	1.997	2.016	2.231	2.063	1.897	2.202	1.723	1.87	1.969	1.835	1.848
pos_3174	Ile Leu	异亮氨酸 亮氨酸	metab_2417	B(i)	-	-	-	M+H	C12H24N2O3	3.9566	-	-	pos	-	-	-	-	-	-	245.187	0.0392243	58	0	2.96307	-	-	2.575	2.776	2.659	2.305	2.555	2.543	2.545	2.5	2.396	2.715	2.631	2.691	2.664	2.753	2.835	2.586	2.596	2.531	2.634	2.609	2.642
pos_3182	(E)-10-Hydroxy-2-decene-4,6-diynoic acid	（E） -10-羟基-2-癸烯-4,6-二炔酸	metab_2426	B(ii)	-	-	HMDB0038965	M+H	C10H10O3	3.8883	-	-	pos	-	-	-	-	Lipids and lipid-like molecules	Fatty Acyls	179.07	0.161699	0	66.6	0.131319	-	Fatty acids and conjugates	1.941	1.606	1.857	2.005	1.626	1.821	1.856	1.593	1.98	1.737	1.92	1.817	1.839	1.9	1.916	1.979	1.906	1.959	1.726	1.784	1.862
pos_3186	Cis-p-Coumaric acid 4-[apiosyl-(1->2)-glucoside]	-	metab_2430	B(ii)	-	-	HMDB0037088	M+NH4	C20H26O12	3.8545	-	-	pos	-	-	-	-	Organic oxygen compounds	Organooxygen compounds	476.177	0.173941	0	35.5	1.41052	-	Carbohydrates and carbohydrate conjugates	2.628	2.081	2.326	2.051	2.228	2.749	2.706	2.31	2.582	2.253	2.598	2.213	2.45	2.614	2.475	2.625	2.384	2.429	2.345	2.449	2.497
pos_3205	Hexadecasphingosine	十六烷基鞘氨醇	metab_2452	B(ii)	-	-	LMSP01040008;HMDB0242181	M+2Na-H	C16H33NO2	3.5955	-	-	pos	-	-	-	-	Organic nitrogen compounds	Organonitrogen compounds	316.221	0.147429	0	53.3	-3.61031	-	Amines	1.994	2.127	1.594	2.063	1.843	1.837	1.458	1.258	1.558	2.142	1.791	1.628	1.935	2.166	2.167	1.991	1.968	1.476	1.933	1.827	1.829
pos_3208	Gnaphaliin	鼠曲草黄素	metab_2455	B(ii)	-	-	LMPK12113093;HMDB0030544	2M+NH4	C17H14O6	3.573	-	-	pos	-	-	-	-	Phenylpropanoids and polyketides	Flavonoids	646.192	0.0490113	0	75.6	0.176512	33803-42-8	O-methylated flavonoids	3.265	3.281	3.032	3.248	3.315	3.254	2.967	2.868	3.092	3.008	3.165	2.947	3.094	3.39	3.203	3.329	3.241	2.94	3.201	3.17	3.16
pos_3210	Glucose lactate lactate	乳酸葡萄糖	metab_2458	B(ii)	-	-	HMDB0252782	M+H-H2O	C12H20O12	3.573	-	-	pos	-	-	-	-	Organic oxygen compounds	Organooxygen compounds	339.092	0.145583	0	81.3	-0.960476	-	Carbohydrates and carbohydrate conjugates	1.915	1.859	1.317	1.794	1.496	1.646	1.432	1.245	1.784	0.7143	1.757	0.9044	1.433	1.963	1.606	1.997	1.612	1.413	1.762	1.682	1.808
pos_3211	5-(3',4',5'-Trihydroxyphenyl)-gamma-valerolactone-3'-O-glucuronide	5-（3'，4'，5'-三羟基苯基）-γ-戊内酯-3'-O-葡萄糖醛酸	metab_2459	B(ii)	-	-	HMDB0059984	M+Na	C17H20O11	3.5619	-	-	pos	-	-	-	-	Organic oxygen compounds	Organooxygen compounds	423.091	0.0991379	0	32.1	2.0698	-	Carbohydrates and carbohydrate conjugates	1.356	2.136	1.024	2.88	1.443	2.773	0.4068	2.714	1.589	0.7949	1.596	0.7479	0.8261	1.411	0.517	1.332	2.761	2.256	2.265	2.194	2.192
pos_3212	Zardaverine	扎尔达维林	metab_2460	B(ii)	-	-	HMDB0259989	2M+ACN+Na	C12H10F2N2O3	3.5507	-	-	pos	-	-	-	-	Organoheterocyclic compounds	Diazines	600.15	0.101067	0	38	4.59161	-	Pyridazines and derivatives	2.128	2.39	2.465	3.379	2.567	3.287	1.916	3.404	2.612	2.335	2.479	2.362	2.167	1.834	2.016	2.391	3.301	3.133	2.864	2.777	2.814
pos_1221	Simulanoquinoline	拟喹啉	metab_248	B(ii)	-	-	HMDB0040379	M+NH4	C37H34N2O7	2.8374	-	-	pos	-	-	-	-	Lipids and lipid-like molecules	Prenol lipids	636.273	0.0229851	0	40.4	3.83008	155416-22-1	Monoterpenoids	3.397	2.771	3.68	3.044	3.136	3.395	3.65	3.61	3.793	3.292	3.934	3.712	3.419	3.481	3.603	3.749	3.459	3.713	3.592	3.572	3.587
pos_3234	2-Methylindole	2-甲基吲哚	metab_2484	B(ii)	-	-	HMDB0245234	M+H	C9H9N	3.3937	-	-	pos	-	-	-	-	Organoheterocyclic compounds	Indoles and derivatives	132.082	0.0522255	0	32.2	6.6123	-	Indoles	2.563	2.298	2.142	2.214	2.041	2.052	2.342	2.083	2.355	2.355	2.451	2.322	2.269	2.48	2.523	2.482	2.249	2.2	2.308	2.348	2.347
pos_3235	Gluten exorphin B4	麸质外啡肽B4	metab_2485	B(ii)	-	-	HMDB0059794	M+NH4	C24H27N5O9	3.3822	-	-	pos	-	-	-	-	Organic acids and derivatives	Carboxylic acids and derivatives	547.214	0.0888116	0	37.4	-0.624035	-	Amino acids, peptides, and analogues	3.342	2.521	3.187	2.825	2.635	2.774	3.343	3.395	3.388	3.219	3.457	3.543	3.201	3.35	3.462	3.452	3.058	3.344	3.34	3.266	3.286
pos_3245	Dimethylaminoparthenolide	二甲氨基帕特酚内酯	metab_2496	B(ii)	-	-	HMDB0251394	M+Na	C17H27NO3	3.325	-	-	pos	-	-	-	-	Lipids and lipid-like molecules	Prenol lipids	316.187	0.0373233	0	57.9	-4.93583	-	Terpene lactones	2.138	2.405	1.954	1.474	1.617	2.139	1.851	1.383	2.065	2.023	2.353	2.119	2.121	2.333	2.32	2.103	2.161	1.693	2.103	2.129	2.133
pos_3247	Ile Val	异亮氨酸 缬氨酸	metab_2498	B(i)	-	-	-	M+H	C11H22N2O3	3.3132	-	-	pos	-	-	-	-	-	-	231.171	0.0962732	42.1	0	1.80504	-	-	2.471	2.713	2.4	2.182	2.333	2.513	2.536	2.262	2.44	2.51	2.692	2.477	2.365	2.667	2.676	2.504	2.584	2.371	2.464	2.493	2.545
pos_3252	Gamma-Glutamylleucine	-	metab_2504	B(ii)	-	-	HMDB0011171	M+H	C11H20N2O5	3.3132	-	-	pos	-	-	-	-	Organic acids and derivatives	Carboxylic acids and derivatives	261.145	0.0670199	0	44.3	1.09812	2566-39-4	Amino acids, peptides, and analogues	2.114	2.278	2.004	1.534	1.841	2.031	2.131	1.942	2.093	1.976	2.28	2.24	2.123	2.288	2.289	2.087	2.154	2.082	2.09	2.14	2.141
pos_3265	Leucyl-Glycine	亮氨酸甘氨酸	metab_2518	B(ii)	-	-	HMDB0028929	M+H	C8H16N2O3	3.3017	-	-	pos	-	-	-	-	Organic acids and derivatives	Carboxylic acids and derivatives	189.124	0.156766	0	41.6	1.67852	-	Amino acids, peptides, and analogues	1.573	1.784	1.302	0.6593	1.352	1.474	1.553	1.496	1.444	1.559	1.625	1.752	1.605	1.67	1.724	1.493	1.576	1.407	1.52	1.648	1.563
pos_3269	Neoliquiritin 2''-apioside	新甘草素2 " -芹菜苷	metab_2522	B(ii)	-	-	HMDB0040544	M+NH4	C26H30O13	3.2787	-	-	pos	-	-	-	-	Organic acids and derivatives	Carboxylic acids and derivatives	568.203	0.141112	0	68.8	1.25255	135432-48-3	Amino acids, peptides, and analogues	1.693	0.5039	1.642	1.45	1.609	1.565	1.4	1.048	1.955	1.361	2.03	1.41	1.36	1.863	1.758	1.874	1.62	1.547	1.729	1.608	1.676
pos_3271	5Z-7-Oxozeaenol	5Z-7-恶唑烯醇	metab_2525	B(ii)	-	-	HMDB0247027	M+H-2H2O	C19H22O7	3.29	-	-	pos	-	-	-	-	Phenylpropanoids and polyketides	Macrolides and analogues	327.121	0.190243	0	50.9	-4.85884	-	Zearalenones	1.24	0.8903	0.9245	0.7707	0.785	0.838	1.171	1.381	1.663	1.042	0.9618	1.174	0.7773	0.882	0.8623	1.27	0.845	1.821	1.061	1.139	1.215
pos_3273	N-(2,3-Dihydroxypropyl)valine	N-（2,3-二羟基丙基）缬氨酸	metab_2527	B(ii)	-	-	HMDB0254994	M+ACN+H	C8H17NO4	3.29	-	-	pos	-	-	-	-	Organic acids and derivatives	Carboxylic acids and derivatives	233.15	0.112916	0	52.3	2.867	-	Amino acids, peptides, and analogues	2.419	2.638	2.404	1.919	2.163	2.348	2.418	2.246	2.352	2.411	2.481	2.529	2.45	2.436	2.519	2.242	2.279	2.34	2.371	2.362	2.448
pos_3276	(E)-2-(2,4-Hexadiynylidene)-1,6-dioxaspiro[4.5]dec-3-ene	（E） -2-（2,4-己二炔基）-1,6-二氧杂螺[4.5]癸-3-烯	metab_2530	B(ii)	-	-	HMDB0029553	2M+ACN+Na	C14H14O2	3.2787	-	-	pos	-	-	-	-	Organic oxygen compounds	Organooxygen compounds	492.213	0.261876	0	94.7	-3.55957	3306-40-9	Ethers	1.915	1.942	1.594	1.854	1.534	1.724	1.549	1.286	1.874	1.591	2.021	1.632	1.766	2.139	1.759	1.837	1.914	1.566	1.727	1.769	1.93
pos_3284	Myricanol 5-glucoside	杨梅醇5 -葡萄糖苷	metab_2539	B(ii)	-	-	HMDB0036525	M+H-H2O	C27H36O10	3.2334	-	-	pos	-	-	-	-	Organoheterocyclic compounds	Lactones	503.23	0.032924	0	30.5	4.26403	90052-02-1	Gamma butyrolactones	2.814	2.418	3.179	2.269	2.091	2.674	2.96	3.172	3.08	2.749	2.747	3.201	2.62	2.749	2.734	2.806	2.577	3.251	2.894	2.875	2.903
pos_3285	Val Val Glu	缬氨酸 缬氨酸 谷氨酸	metab_2540	B(i)	-	-	-	M+H	C15H27N3O6	3.2334	-	-	pos	-	-	-	-	-	-	346.197	0.140131	60.8	0	-0.76443	-	-	2.724	2.929	2.597	2.364	2.461	2.729	2.657	2.357	2.722	2.707	2.951	2.789	2.758	2.992	3.011	2.809	2.902	2.504	2.692	2.796	2.807
pos_3286	Erinapyrone B	猴头菌吡喃酮B	metab_2541	B(ii)	-	-	HMDB0041427	M+H-2H2O	C7H10O3	3.2334	-	-	pos	-	-	-	-	Organoheterocyclic compounds	Pyrans	107.05	0.203754	0	46.8	7.2137	146064-67-7	Pyranones and derivatives	1.724	1.738	1.615	1.412	1.378	1.543	1.468	1.331	1.689	1.644	1.908	1.651	1.687	1.964	1.876	1.627	1.745	1.5	1.562	1.731	1.713
pos_3294	4-Amino-1-[(2R,5R)-3,4-dihydroxy-5-(hydroxymethyl)oxolan-2-yl]-5-methylpyrimidin-2-one	4-氨基-1-[（2R，5R）-3,4-二羟基-5-（羟甲基）氧代烷-2-基]-5-甲基嘧啶-2-酮	metab_2550	B(ii)	-	-	HMDB0257731	2M+ACN+H	C10H15N3O5	3.1887	-	-	pos	-	-	-	-	Nucleosides, nucleotides, and analogues	Pyrimidine nucleosides	556.237	0.0309926	0	39.4	1.66201	-	Not Available	2.248	0.817	2.185	1.045	1.194	1.967	2.239	1.684	2.379	2.35	2.027	2.113	1.138	1.959	1.979	2.002	1.584	1.964	2.081	2.076	2.056
pos_3295	Tamoxifen-N-glucuronide	他莫昔芬-N-葡糖苷酸	metab_2551	B(ii)	-	-	PW_C040668;HMDB0060616	M+H-H2O	C32H38NO7+	3.1774	-	-	pos	-	-	-	-	Phenylpropanoids and polyketides	Stilbenes	531.259	0.131755	0	59.2	-5.14457	-	Stilbene glycosides	1.601	1.186	2.103	1.24	1.443	1.393	1.755	1.914	2.055	2.221	1.701	1.873	1.064	1.245	1.469	1.647	1.259	1.489	1.692	1.579	1.641
pos_3302	Ile Ala Glu	异亮氨酸 丙氨酸 谷氨酸	metab_2560	B(i)	-	-	-	M+H	C14H25N3O6	3.1549	-	-	pos	-	-	-	-	-	-	332.183	0.112635	33.9	0	4.01765	-	-	2.867	3.034	2.727	2.585	2.625	2.884	2.79	2.597	2.824	2.888	3.032	2.946	2.931	3.101	3.095	2.908	3.008	2.717	2.83	2.912	2.922
pos_3306	Thr Leu Asp	苏氨酸 亮氨酸 天冬氨酸	metab_2564	B(i)	-	-	-	M+H	C14H25N3O7	3.1212	-	-	pos	-	-	-	-	-	-	348.177	0.110441	34	0	0.895946	-	-	2.354	2.551	2.218	2.093	2.149	2.389	2.388	2.118	2.425	2.355	2.641	2.461	2.474	2.721	2.693	2.512	2.59	2.276	2.398	2.442	2.493
pos_3319	Tazolol	噻唑心安	metab_2578	B(ii)	-	-	HMDB0258752	2M+ACN+H	C9H16N2O2S	2.8262	-	-	pos	-	-	-	-	Organic oxygen compounds	Organooxygen compounds	474.219	0.0411406	0	35.3	-3.276	-	Ethers	3.533	2.906	3.749	2.974	3.139	3.349	3.701	3.743	3.834	3.362	4.042	3.872	3.598	3.803	3.818	3.876	3.498	3.723	3.673	3.697	3.709
pos_332	N-[1-(3,5-dimethylphenyl)-2-oxopyrrolidin-3-yl]thiophene-3-carboxamide	N-[1-（3,5-二甲基苯基）-2-氧代吡咯烷-3-基]噻吩-3-甲酰胺	metab_2579	B(i)	-	-	-	M+H, M+K	C17H18N2O2S	1.063	-	-	pos	-	-	-	-	-	-	353.07	0.294014	47.8	0	-6.44467	-	-	1.395	1.779	2.229	1.93	2.455	2.554	1.468	1.138	1.908	1.737	2.756	2.001	3.003	1.999	2.426	2.132	2.133	1.138	1.842	2.083	2.091
pos_3321	Ile Arg	异亮氨酸 精氨酸	metab_2581	B(i)	-	-	-	M+H	C12H25N5O3	2.815	-	-	pos	-	-	-	-	-	-	288.204	0.15452	34.3	0	2.9732	-	-	2.304	2.46	1.938	1.596	1.578	2.434	2.23	1.832	2.013	2.093	2.394	2.23	2.43	2.418	2.425	2.061	2.438	2.093	2.247	2.337	2.211
pos_3326	Valine lactate	-	metab_2586	B(ii)	-	-	HMDB0259749	M+ACN+H	C8H15NO5	2.7476	-	-	pos	-	-	-	-	Organic acids and derivatives	Carboxylic acids and derivatives	247.129	0.133503	0	50.9	1.16742	-	Amino acids, peptides, and analogues	1.9	2.082	1.919	1.558	1.869	2.044	1.87	1.577	1.834	2.08	2.105	1.935	2.103	2.165	2.218	1.96	2.137	1.731	1.981	2.045	1.931
pos_3329	Cysteinyl-Arginine	半胱氨酸-精氨酸	metab_2589	B(ii)	-	-	HMDB0028769	2M+ACN+Na	C9H19N5O3S	2.7026	-	-	pos	-	-	-	-	Organic acids and derivatives	Carboxylic acids and derivatives	618.263	0.15791	0	63	9.20293	-	Amino acids, peptides, and analogues	2.17	0.9049	2.848	2.397	2.731	2.906	2.705	2.484	2.774	2.358	2.644	2.304	2.427	1.717	2.298	2.796	2.723	3.101	2.777	2.651	2.677
pos_3330	9-Carboxymethoxymethylguanine	9 -羧甲氧甲基鸟嘌呤	metab_2591	B(ii)	-	-	HMDB0060805	M+H	C8H9N5O4	2.7026	-	-	pos	-	-	-	-	Organoheterocyclic compounds	Imidazopyrimidines	240.072	0.207947	0	30.3	-4.82977	-	Purines and purine derivatives	1.412	1.673	1.708	1.188	1.515	1.884	1.729	1.626	1.893	1.954	1.882	1.693	0.8798	1.678	1.665	1.886	1.85	2.222	1.751	1.878	1.715
pos_3332	Epsilon-(Carboxyethyl)lysine	-	metab_2593	B(ii)	-	-	HMDB0251886	M+H	C9H18N2O4	2.6912	-	-	pos	-	-	-	-	Organic acids and derivatives	Carboxylic acids and derivatives	219.133	0.16422	0	33.4	-2.20915	-	Amino acids, peptides, and analogues	1.112	1.485	1.284	1.008	1.172	1.386	1.211	1.011	1.285	1.382	1.436	1.264	1.372	1.403	1.556	1.279	1.501	1.369	1.243	1.376	1.296
pos_3340	Maltoundecaose	麦芽糖	metab_2602	B(ii)	-	-	HMDB0059958	M+H+Na	C66H112O56	2.6351	-	-	pos	-	-	-	-	Organic Polymers	Polysaccharides	912.295	0.106696	0	81.4	1.31307	-	Not Available	2.602	2.529	2.726	2.617	2.819	3.034	2.631	2.289	2.878	2.925	2.74	2.285	2.44	2.313	2.388	2.734	2.803	3.123	2.76	2.853	2.809
pos_3344	7-[(2R,4aR,5S,7aR)-2-(1,1-difluoropentyl)-2-hydroxy-6-oxo-octahydrocyclopenta[b]pyran-5-yl]heptanoyl-CoA	7-[（2R，4aR，5S，7aR）-2-（1,1-二氟戊基）-2-羟基-6-氧代-八氢环戊并[b]吡喃-5-基]庚酰基辅酶A	metab_2606	B(ii)	-	-	HMDB0301650	M+NH4	C41H66F2N7O20P3S	2.6237	-	-	pos	-	-	-	-	Not Available	Not Available	1157.37	0.151605	0	51.5	6.35868	-	Not Available	2.31	2.327	2.396	2.151	2.586	2.599	2.64	2.77	2.702	2.65	2.291	2.251	2.262	1.972	1.887	2.682	2.604	2.888	2.593	2.599	2.706
pos_1233	Glu Ile Glu	谷氨酸 异亮氨酸 谷氨酸	metab_261	B(i)	-	-	-	M+H	C16H27N3O8	3.1437	-	-	pos	-	-	-	-	-	-	390.189	0.107605	45.1	0	5.64013	-	-	2.338	2.523	2.369	2.238	2.218	2.436	2.346	2.054	2.367	2.317	2.598	2.49	2.537	2.782	2.722	2.566	2.697	2.277	2.412	2.486	2.502
pos_3348	Maltooctaose	麦芽糖	metab_2610	B(ii)	-	-	HMDB0059935	M+H+Na	C48H82O41	2.6237	-	-	pos	-	-	-	-	Organic oxygen compounds	Organooxygen compounds	669.211	0.0933493	0	64.1	-5.51806	-	Carbohydrates and carbohydrate conjugates	3.015	2.91	3.034	2.823	2.819	3.176	2.999	2.622	3.188	3.227	2.994	2.861	2.463	2.689	2.724	2.969	3.062	3.354	3.031	3.078	3.113
pos_3350	4,4'-Dihydroxyantipyrine	4，4 ' -二羟基安替比林	metab_2613	B(ii)	-	-	HMDB0246602	M+ACN+Na	C11H12N2O3	2.6237	-	-	pos	-	-	-	-	Organoheterocyclic compounds	Azoles	284.1	0.143516	0	46	-4.0693	-	Pyrazoles	2.318	2.712	1.9	2.469	1.569	1.298	1.19	1.499	1.162	2.154	0.8902	1.952	2.11	1.896	1.615	1.322	1.831	1.317	1.925	2.047	2.019
pos_1234	Ala Ile Asp	丙氨酸 异亮氨酸 天冬氨酸	metab_262	B(i)	-	-	-	M+H	C13H23N3O6	3.1549	-	-	pos	-	-	-	-	-	-	318.169	0.0689377	44.1	0	8.89626	-	-	2.192	2.349	2.182	2.013	2.121	2.301	2.165	2.036	2.242	2.325	2.484	2.241	2.331	2.482	2.516	2.246	2.38	2.037	2.255	2.275	2.216
pos_3371	Alpha-Ketoglutarate cyanohydrin	-	metab_2636	B(ii)	-	-	HMDB0248224	M+H-2H2O	C5H6O5	2.2572	-	-	pos	-	-	-	-	Organic acids and derivatives	Carboxylic acids and derivatives	111.008	0.0918504	0	41.5	0.336446	-	Dicarboxylic acids and derivatives	3.221	3.369	3.486	3.537	3.612	3.365	3.191	3.301	3.105	3.581	3.176	3.322	3.512	3.214	3.303	3.004	3.26	3.12	3.326	3.331	3.258
pos_3395	((2-Amino-3-((2-amino-3-((carboxymethyl)amino)-3-oxopropyl)dithio)propanoyl)amino)acetic acid	（（2-氨基-3-（（2-氨基-3-（（羧甲基）氨基）-3-氧代丙基）二硫代）丙酰基）氨基）乙酸	metab_2662	B(ii)	-	-	HMDB0242125	M+H-H2O	C10H18N4O6S2	1.4538	-	-	pos	-	-	-	-	Organic acids and derivatives	Carboxylic acids and derivatives	337.062	0.17659	0	36.6	-3.85282	-	Amino acids, peptides, and analogues	2.706	2.7	3.193	3.063	2.931	3.147	3.254	3.508	3.175	3.399	3.419	3.341	3.29	3.474	3.727	3.399	3.515	2.97	3.164	3.308	3.302
pos_124	4'-O-methyl-(-)-epicatechin-5-O-beta-glucuronide	4'-O-甲基-（-）-表儿茶素-5-O-β-葡萄糖醛酸苷	metab_268	B(ii)	-	-	HMDB0029181	M+NH4, M+Na, M+H-H2O	C23H26O11	4.3315	-	-	pos	-	-	-	-	Phenylpropanoids and polyketides	Flavonoids	461.145	0.0668154	0	56.2	2.34096	-	Flavonoid glycosides	3.644	3.252	3.438	3.379	3.268	3.471	3.493	3.508	3.759	3.463	3.499	3.618	3.302	3.382	3.264	3.497	3.365	3.544	3.455	3.512	3.476
pos_3428	Exotoxin	外毒素	metab_2699	B(ii)	-	-	HMDB0252148	M+NH4	C22H32N5O19P	1.3155	-	-	pos	-	-	-	-	Nucleosides, nucleotides, and analogues	Purine nucleosides	719.176	0.114431	0	74.5	-1.25957	-	Not Available	2.16	2.113	3.002	2.052	2.457	2.047	2.139	2.435	2.867	2.908	2.903	2.857	2.033	2.169	2.758	2.557	2.501	2.632	2.728	2.632	2.665
pos_3454	Anhydrosafflor Yellow B	脱水红花黄色素b	metab_2728	B(ii)	-	-	HMDB0031914	M+H+Na	C48H52O26	1.259	-	-	pos	-	-	-	-	Phenylpropanoids and polyketides	Cinnamic acids and derivatives	534.13	0.196904	0	53.3	-9.98967	184840-84-4	Hydroxycinnamic acids and derivatives	2.904	1.778	2.933	2.818	2.278	3.194	3.059	2.728	3.153	3.265	2.843	3.166	2.701	2.332	2.46	2.824	3.154	3.557	2.999	3.102	3.173
pos_1245	[6-Hydroxy-8-methyl-3-[3,4,5-trihydroxy-6-(hydroxymethyl)oxan-2-yl]oxy-9,10-dioxatetracyclo[4.3.1.02,5.03,8]decan-4-yl]methyl benzoate	[6-羟基-8-甲基-3-[3,4,5-三羟基-6-（羟甲基）氧代-2-基]氧-9,10-二氧杂环[4.3.1.02,5.03,8]癸-4-基]苯甲酸甲酯	metab_274	B(ii)	-	-	HMDB0257573	M+NH4	C23H28O11	3.2334	-	-	pos	-	-	-	-	Organic oxygen compounds	Organooxygen compounds	498.197	0.0585472	0	40.5	0.473725	-	Carbohydrates and carbohydrate conjugates	2.324	1.603	2.695	0.5687	0.0948	1.482	2.23	2.22	2.722	1.984	2.182	2.67	1.542	2.078	2.137	2.138	1.314	2.568	2.319	2.292	2.342
pos_3468	Ethyl glucuronide	乙基葡萄糖醛酸苷	metab_2743	B(ii)	-	-	HMDB0010325	2M+NH4	C8H14O7	1.2362	-	-	pos	-	-	-	-	Organic oxygen compounds	Organooxygen compounds	462.183	0.0362553	0	59.4	3.608	17685-04-0	Carbohydrates and carbohydrate conjugates	2.018	1.06	2.578	1.762	2.323	2.187	2.302	2.585	2.466	2.103	2.917	2.788	2.797	2.43	2.781	2.795	2.234	2.367	2.528	2.54	2.509
pos_3474	Filgotinib	非戈替尼	metab_2750	B(ii)	-	-	HMDB0252256	M+CH3OH+H	C21H23N5O3S	1.2248	-	-	pos	-	-	-	-	Organoheterocyclic compounds	Pyridines and derivatives	458.188	0.291433	0	90.1	4.46401	-	Phenylpyridines	2.158	1.119	1.841	1.413	1.806	1.797	2.307	2.219	1.75	0.9687	2.306	2.276	2.224	1.883	2.099	2.474	1.446	2.342	2.268	2.301	2.044
pos_3484	Thalidomide arene oxide	氧化沙利度胺芳烃	metab_2761	B(ii)	-	-	HMDB0013872	2M+ACN+Na	C13H10N2O5	1.202	-	-	pos	-	-	-	-	Organoheterocyclic compounds	Isoindoles and derivatives	612.131	0.277394	0	34	-5.82819	1488-25-1	Isoindolines	2.572	2.484	1.27	0.6579	2.042	1.594	1.884	2.216	2.213	2.094	1.924	1.685	1.59	1.77	1.159	1.946	1.321	1.863	1.952	2.19	2.059
pos_3486	2-Fucosyllactose	2 -岩藻糖乳糖	metab_2763	B(ii)	-	-	HMDB0002098	M+Na	C18H32O15	1.202	-	-	pos	-	-	-	-	Organic oxygen compounds	Organooxygen compounds	511.163	0.137676	0	54.7	-0.0463516	41263-94-9	Carbohydrates and carbohydrate conjugates	1.74	1.385	2.185	0.8259	1.935	1.742	0.8187	1.557	2.027	1.705	2.689	1.974	2.25	1.881	2.259	2.026	1.751	1.281	2.013	2.102	1.994
pos_3551	2-[(5-Methylsulfinyl)-4-penten-2-ynylidene]-1,6-dioxaspiro[4.4]non-3-ene	2-[（5-甲基亚磺酰基）-4-戊烯-2-亚炔基]-1,6-二氧杂螺[4.4]壬-3-烯	metab_2836	B(ii)	-	-	HMDB0032670	M+H-2H2O	C13H14O3S	1.063	-	-	pos	-	-	-	-	Organic oxygen compounds	Organooxygen compounds	215.052	0.0629256	0	83.9	-2.22648	-	Ethers	1.629	2.116	2.005	1.756	2.327	2.108	1.361	1.477	1.77	1.628	2.299	1.913	2.38	1.648	1.994	1.675	1.889	1.271	1.862	1.916	1.899
pos_3552	Cyclic Urea	环状脲	metab_2837	B(ii)	-	-	HMDB0250626	M+2Na-H	C5H10N2O3	1.063	-	-	pos	-	-	-	-	Organoheterocyclic compounds	Diazepanes	191.04	0.284781	0	71.5	-0.604508	-	1,3-diazepanes	1.647	2.493	1.1	0.787	1.726	0.9312	1.408	2.23	1.652	1.017	1.455	1.696	1.719	1.521	1.3	1.62	1.175	1.545	1.532	1.668	1.78
pos_3566	Aspartyl-Cysteine	天冬氨酰-半胱氨酸	metab_2852	B(ii)	-	-	HMDB0028750	M+H-2H2O	C7H12N2O5S	1.05	-	-	pos	-	-	-	-	Organic acids and derivatives	Carboxylic acids and derivatives	201.035	0.158098	0	41.3	8.90629	-	Amino acids, peptides, and analogues	1.574	2.02	1.383	1.502	1.95	1.707	0.8207	0.6591	1.252	0.9478	1.718	1.652	1.915	1.709	1.745	1.099	1.401	0.6927	1.476	1.565	1.611
pos_1267	1-[3-[ethyl(oxan-4-yl)amino]azetidin-1-yl]ethanone	1-[3-[乙基（氧杂-4-基）氨基]氮杂环丁烷-1-基]乙酮	metab_298	B(i)	-	-	-	M+H	C12H22N2O2	3.5619	-	-	pos	-	-	-	-	-	-	227.175	0.0896057	30.8	0	0.0551104	-	-	3.354	3.419	3.439	3.464	3.487	3.392	3.306	3.337	3.198	3.438	3.289	3.355	3.473	3.389	3.421	3.327	3.382	3.319	3.414	3.358	3.341
pos_3696	3,5-Dinitrobenzoyl chloride	3,5-二硝基苯甲酰氯	metab_2996	B(ii)	-	-	HMDB0246068	2M+K	C7H3ClN2O5	0.914	-	-	pos	-	-	-	-	Benzenoids	Benzene and substituted derivatives	498.908	0.231837	0	32.4	-2.53117	-	Nitrobenzenes	1.803	1.944	1.433	1.639	2.055	1.948	0.8822	0.5315	1.551	1.787	1.56	0.8905	0.7029	1.513	0.9042	0.6267	1.083	1.45	1.589	1.422	1.435
pos_1271	Ala Phe Glu	丙氨酸 苯丙氨酸 谷氨酸	metab_303	B(i)	-	-	-	M+H	C17H23N3O6	3.618	-	-	pos	-	-	-	-	-	-	366.167	0.244957	50	0	3.58843	-	-	1.364	2.109	1.289	0.5995	1.327	1.7	0.5931	1.03	1.786	1.261	1.808	1.139	1.456	1.796	1.379	1.29	1.691	0.8372	1.27	1.334	1.464
pos_374	Methyl (2S)-2-[[4-[[(2R)-2-amino-3-sulfanylpropyl]amino]-2-phenylbenzoyl]amino]-4-methylsulfanylbutanoate	（2S）-2-[[4-[[（2R）-2-氨基-3-磺酰基丙基]氨基]-2-苯基苯甲酰基]氨基]-4-甲基磺酰基丁酸甲酯	metab_3033	B(ii)	-	-	HMDB0252503	M+H, M+ACN+H	C22H29N3O3S2	1.2362	-	-	pos	-	-	-	-	Organic acids and derivatives	Carboxylic acids and derivatives	489.195	0.266731	0	68.2	-9.66574	-	Amino acids, peptides, and analogues	2.352	1.025	2.829	2.173	2.706	2.522	2.214	2.655	2.139	2.282	3.011	2.415	2.987	2.399	2.766	2.797	2.289	1.986	2.573	2.628	2.389
pos_1272	Corynoxeine	科里诺辛	metab_304	B(ii)	-	-	HMDB0250480	M+2Na-H	C22H26N2O4	3.6517	-	-	pos	-	-	-	-	Organoheterocyclic compounds	Indolizidines	427.158	0.0443762	0	42.4	-7.37495	-	Not Available	2.316	2.526	2.122	2.225	2.004	2.198	2.206	2.193	2.509	2.32	2.439	2.202	2.218	2.495	2.38	2.431	2.344	2.266	2.373	2.335	2.352
pos_407	Catechin-(4alpha->8)-gallocatechin-(4alpha->8)-catechin	儿茶素-（4alpha->8）-没食子儿茶素-（4alpha->8）-儿茶素	metab_3070	B(ii)	-	-	HMDB0038375	M+2H, M+H	C45H38O19	2.6237	-	-	pos	-	-	-	-	Phenylpropanoids and polyketides	Flavonoids	442.105	0.117183	0	34.7	-5.33734	87421-89-4	Biflavonoids and polyflavonoids	2.608	2.232	2.813	2.604	2.525	2.556	2.855	2.782	2.652	2.832	2.591	2.91	2.679	2.245	2.699	2.628	2.761	2.795	2.745	2.797	2.695
pos_412	Trioxyethylene dimethacrylate	-	metab_3076	B(ii)	-	-	HMDB0244334;HMDB0259257	M+H-H2O, M+H	C10H14O7	2.6462	-	-	pos	-	-	-	-	Organic acids and derivatives	Carboxylic acids and derivatives	247.082	0.111429	0	30.6	2.72195	-	Dicarboxylic acids and derivatives	1.719	0.5177	2.077	1.706	1.93	2.266	2.112	2.104	2.047	2.057	1.77	1.985	1.677	0.7853	1.613	2.093	1.996	2.557	1.996	1.995	1.91
pos_1276	Sucrose 1',4'-(4,4'-dihydroxy-3,3'-dimethoxy-b-truxinate)	蔗糖1’，4’-（4,4’-二羟基-3,3’-二甲氧基-b-truxinate）	metab_308	B(ii)	-	-	HMDB0036978	M+H	C32H38O17	3.6855	-	-	pos	-	-	-	-	Phenylpropanoids and polyketides	Stilbenes	695.219	0.0549367	0	44.5	0.625915	-	Stilbene glycosides	2.675	2.095	1.756	2.102	2.273	2.428	2.421	2.237	2.592	2.557	1.98	2.14	1.101	2.093	1.926	2.296	1.728	2.111	2.245	2.293	2.273
pos_1277	Maysin 3'-methyl ether	梅辛3'-甲基醚	metab_309	B(ii)	-	-	HMDB0037420	M+NH4	C28H30O14	3.7305	-	-	pos	-	-	-	-	Phenylpropanoids and polyketides	Flavonoids	608.196	0.0733484	0	36.2	-2.48574	74158-05-7	Flavonoid glycosides	2.536	2.145	2.248	2.336	2.396	2.54	2.491	2.339	2.424	2.568	2.453	2.286	1.945	2.357	2.407	2.459	2.405	2.327	2.428	2.365	2.395
pos_1278	Dansylglutamyl-glycyl-arginine chloromethyl ketone	丹磺酰谷氨酰-甘氨酰-精氨酸氯甲基酮	metab_310	B(ii)	-	-	HMDB0250847	M+NH4	C26H36ClN7O7S	3.7305	-	-	pos	-	-	-	-	Organic acids and derivatives	Carboxylic acids and derivatives	643.241	0.226149	0	36.9	-2.29672	-	Amino acids, peptides, and analogues	1.691	0.7334	1.105	0.9876	0.6357	0.6847	1.407	1.682	1.823	0.6957	1.756	1.546	0.6286	1.276	1.304	1.72	1.144	1.513	1.252	1.441	1.344
pos_44	2-Octenedioic acid	2 -辛二酸	metab_3106	B(ii)	-	-	HMDB0000341;LMFA01170085	M+H-H2O, M+Na, M+H, M+H-2H2O	C8H12O4	5.8435	-	-	pos	-	-	-	-	Lipids and lipid-like molecules	Fatty Acyls	155.07	0.0510246	0	37.9	-1.74595	5698-50-0	Fatty acids and conjugates	3.828	3.832	3.311	3.547	3.619	3.788	3.666	3.342	3.692	3.624	3.846	3.315	3.368	3.614	3.793	3.856	3.733	3.686	3.679	3.696	3.723
pos_452	Indoleacrylic acid	吲哚丙烯酸	metab_3120	B(ii)	-	-	HMDB0000734	M+H, M+NH4	C11H9NO2	3.3822	-	-	pos	-	-	-	-	Organoheterocyclic compounds	Indoles and derivatives	188.07	0.0124498	0	49.6	-1.91261	29953-71-7	Indoles	4.883	4.708	4.626	4.616	4.516	4.574	4.707	4.54	4.755	4.711	4.892	4.719	4.69	4.885	4.88	4.846	4.678	4.583	4.73	4.741	4.737
pos_454	1-Benzazepine	1-苯扎地平	metab_3122	B(ii)	-	-	HMDB0244865	M+, M+H	C10H9N	3.3822	-	-	pos	-	-	-	-	Organoheterocyclic compounds	Benzazepines	144.081	0.0292461	0	68.2	-1.87484	-	Not Available	3	2.819	2.768	2.68	2.539	2.648	2.855	2.711	2.888	2.851	3.025	2.877	2.796	3.028	3.043	3.027	2.817	2.711	2.865	2.864	2.886
pos_1281	Leu Glu	亮氨酸 谷氨酸	metab_314	B(i)	-	-	-	M+H	C11H20N2O5	3.832	-	-	pos	-	-	-	-	-	-	261.145	0.0789598	35	0	1.41044	-	-	2.602	2.891	2.529	2.215	2.295	2.387	2.632	2.367	2.5	2.867	2.673	2.451	2.276	2.428	2.495	2.329	2.55	2.322	2.513	2.56	2.581
pos_478	Alpha-L-Rhamnopyranosyl-(1->3)-alpha-D-galactopyranosyl-(1->3)-L-fucose	-	metab_3148	B(ii)	-	-	HMDB0039741	M+H-2H2O, 2M+ACN+Na	C18H32O14	3.8883	-	-	pos	-	-	-	-	Organic oxygen compounds	Organooxygen compounds	1008.37	0.0582104	0	64.7	-8.90958	71144-75-7	Carbohydrates and carbohydrate conjugates	3.148	2.62	3.277	2.95	2.761	3.282	3.454	3.381	3.45	3.268	3.228	3.372	2.99	3.018	3.088	3.355	3.305	3.667	3.265	3.316	3.293
pos_49	Carboxydextran	羧葡聚糖	metab_3161	B(ii)	-	-	HMDB0249656	M+NH4, 2M+Na, M+K, M+Na	C19H32O18	6.6903	-	-	pos	-	-	-	-	Lipids and lipid-like molecules	Fatty Acyls	566.189	0.0390964	0	36.8	-6.12011	-	Fatty acyl glycosides	5.059	5.256	4.654	4.984	5.313	4.8	4.48	4.33	5.22	4.964	5.423	4.473	5.202	5.388	5.191	5.173	4.972	4.378	5.07	5.092	5.104
pos_1284	1-Hydroxy-5,5-dimethylpyrrolidin-2-ol	1 -羟基- 5，5 -二甲基吡咯烷- 2 -醇	metab_317	B(ii)	-	-	HMDB0257628	M+H-H2O	C6H13NO2	3.8883	-	-	pos	-	-	-	-	Organoheterocyclic compounds	Pyrrolidines	114.091	0.145976	0	31.1	0.757444	-	Not Available	3.433	3.456	3.528	3.556	3.568	3.652	3.619	3.633	3.456	3.682	3.526	3.647	3.773	3.669	3.645	3.529	3.653	3.606	3.502	3.629	3.571
pos_499	1,2,4-Benzenetricarboxylic acid	4-苯三羧酸	metab_3171	B(i)	-	-	-	M+H-H2O, M+H	C9H6O6	3.3017	-	-	pos	-	-	-	-	-	-	193.013	0.0850171	47.4	0	1.12958	-	-	2.571	2.434	2.188	2.609	2.62	2.516	2.331	1.982	2.533	2.491	2.731	2.177	2.771	2.825	2.712	2.708	2.581	1.939	2.511	2.541	2.584
pos_1285	Polyethylene, oxidized	聚乙烯，氧化	metab_318	B(ii)	-	-	HMDB0032472	M+H-2H2O	C12H20O5	3.8997	-	-	pos	-	-	-	-	Organic acids and derivatives	Keto acids and derivatives	209.117	0.25342	0	30.2	0.00963927	68441-17-8	Medium-chain keto acids and derivatives	2.407	0.7851	2.121	2.447	2.497	2.51	2.195	1.096	2.37	0.5692	2.389	1.631	2.421	2.609	2.379	2.307	2.319	1.856	2.067	2.269	2.281
pos_1286	Pisumionoside	皮苏米奥尼德	metab_319	B(ii)	-	-	HMDB0039947	M+H-H2O	C19H32O9	3.9112	-	-	pos	-	-	-	-	Lipids and lipid-like molecules	Prenol lipids	387.203	0.22669	0	48.6	2.94724	371113-06-3	Terpene glycosides	2.079	2.637	0.07308	0.08101	1.105	1.714	0.6213	0.07489	0.1045	0.09845	0.1049	0.08417	0.08237	1.894	2.099	1.262	0.8023	0.08192	1.469	1.407	1.59
pos_515	HoPhe-Nap-OH	-	metab_3190	B(i)	-	-	-	M+H-H2O, M+H	C28H24N2O6	4.6173	-	-	pos	-	-	-	-	-	-	467.156	0.0611492	31.8	0	-9.03638	-	-	3.442	3.315	3.095	3.29	3.216	3.514	3.27	3.306	3.553	3	3.598	3.088	3.239	3.35	3.21	3.575	3.354	3.373	3.332	3.362	3.385
pos_52	Pgg-glucan	-	metab_3195	B(ii)	-	-	HMDB0256373	M+Na, M+K, M+NH4, M+H+Na	C36H62O31	2.6126	-	-	pos	-	-	-	-	Organic oxygen compounds	Organooxygen compounds	1029.3	0.152063	0	30.5	4.76168	-	Carbohydrates and carbohydrate conjugates	4.404	4.119	4.296	4.087	3.912	4.391	4.522	4.351	4.572	4.487	4.402	4.415	4.078	4.169	4.186	4.41	4.403	4.659	4.326	4.442	4.449
pos_526	(S)-5'-Deoxy-5'-(methylsulfinyl)adenosine	（S） -5’-脱氧-5’-（甲基亚磺酰基）腺苷	metab_3202	B(ii)	-	-	HMDB0033662	M+, M+ACN+H	C11H15N5O4S	4.7318	-	-	pos	-	-	-	-	Nucleosides, nucleotides, and analogues	5''-deoxyribonucleosides	355.118	0.0635229	0	35.9	-2.49544	897-42-7	Not Available	2.807	2.476	2.466	2.607	2.659	2.791	2.641	2.689	2.948	2.737	2.958	2.689	2.53	2.687	2.67	2.966	2.733	2.677	2.736	2.768	2.791
pos_1288	N,N'-Bis(g-glutamyl)-3,3'-(1,2-propylenedithio)dialanine	N、 N’-双（g-谷氨酰基）-3,3’-（1,2-丙二硫代）二氨	metab_321	B(ii)	-	-	HMDB0038667	M+CH3OH+H	C19H32N4O10S2	3.9225	-	-	pos	-	-	-	-	Organic acids and derivatives	Carboxylic acids and derivatives	573.194	0.151483	0	44.7	8.82177	-	Amino acids, peptides, and analogues	2.318	2.87	1.762	2.944	1.831	2.926	2.074	2.617	2.063	1.577	1.922	1.444	1.365	1.88	1.597	1.724	2.916	2.844	2.355	2.426	2.487
pos_1289	Flacourtin	弗拉考廷	metab_322	B(ii)	-	-	HMDB0039172	M+CH3OH+H	C20H22O9	3.934	-	-	pos	-	-	-	-	Organic oxygen compounds	Organooxygen compounds	439.16	0.0833456	0	39.8	0.101337	113270-18-1	Carbohydrates and carbohydrate conjugates	2.882	2.596	2.704	2.767	2.544	2.804	2.822	2.799	2.905	2.745	2.884	2.791	2.527	2.884	2.847	2.861	2.927	2.802	2.752	2.812	2.82
pos_551	Imiglitazar	伊米利扎尔	metab_3230	B(ii)	-	-	HMDB0253429	M+H-2H2O, M+K	C28H26N2O5	5.1131	-	-	pos	-	-	-	-	Organoheterocyclic compounds	Azoles	435.166	0.0828733	0	37.6	-9.42329	-	Oxazoles	3.228	2.534	3.534	3.099	2.822	3.449	3.123	3.62	4.053	3.506	3.213	3.621	2.919	2.933	2.838	3.332	3.28	3.538	3.385	3.45	3.446
pos_562	Tyr Ala Asp Lys	-	metab_3242	B(i)	-	-	-	M+H, M+ACN+H	C22H33N5O8	4.9743	-	-	pos	-	-	-	-	-	-	537.268	0.0348768	39.5	0	1.7273	-	-	3.335	3.386	2.627	2.727	3.035	3.074	3.09	2.708	3.206	3.032	3.206	2.589	2.905	3.249	3.194	3.172	2.923	2.279	3.078	3.056	3.085
pos_1291	Oleuropein-aglycone	橄榄苦苷-苷元	metab_325	B(ii)	-	-	HMDB0301749	M+H-2H2O	C19H22O8	3.968	-	-	pos	-	-	-	-	Lipids and lipid-like molecules	Prenol lipids	343.119	0.0641139	0	60.9	3.26687	-	Monoterpenoids	3.153	3.105	2.813	3.032	3.29	3.063	3.111	2.768	3.371	3.121	3.4	3.062	3.393	3.384	3.271	3.406	3.082	2.926	3.157	3.2	3.211
pos_1294	Methyl helianthenoate A glucoside	甲基橙花酸A葡萄糖苷	metab_328	B(ii)	-	-	HMDB0040899	M+H-2H2O	C19H24O8	4.0362	-	-	pos	-	-	-	-	Lipids and lipid-like molecules	Fatty Acyls	345.134	0.214265	0	36.6	0.675186	152230-54-1	Fatty acyl glycosides	2.701	1.906	2.378	2.137	2.072	2.595	2.6	2.639	2.872	2.487	2.708	2.572	2.294	2.302	2.321	2.669	2.406	2.669	2.41	2.596	2.564
pos_614	Indole-3-acetyl-glycine	-	metab_3300	B(ii)	-	-	HMDB0304381	M+H-H2O, M+ACN+H	C12H11N2O3-	5.9279	-	-	pos	-	-	-	-	Organic acids and derivatives	Carboxylic acids and derivatives	273.112	0.125615	0	36.1	6.78947	-	Amino acids, peptides, and analogues	2.109	0.8706	1.731	1.349	1.196	1.438	1.962	2.03	2.272	2.312	1.892	1.942	1.437	1.74	1.943	2.042	1.775	1.973	2.027	1.973	1.919
pos_617	Hexyl-agarose	木糖-琼脂糖	metab_3303	B(ii)	-	-	HMDB0253166	M+H-H2O, M+2Na-H	C30H50O19	5.7956	-	-	pos	-	-	-	-	Organic oxygen compounds	Organooxygen compounds	759.273	0.118644	0	30.7	9.69094	-	Carbohydrates and carbohydrate conjugates	2.731	2.885	2.806	2.401	2.143	2.717	2.282	2.644	2.885	2.82	2.689	2.78	2.323	2.482	2.412	2.783	2.734	2.861	2.679	2.767	2.775
pos_1298	Dibekacin	双去氧卡那霉素	metab_332	B(ii)	-	-	HMDB0251157	M+H-2H2O	C18H37N5O8	4.0928	-	-	pos	-	-	-	-	Organic oxygen compounds	Organooxygen compounds	416.25	0.0448432	0	43.8	-0.886173	-	Carbohydrates and carbohydrate conjugates	2.54	2.672	2.555	2.511	2.498	2.625	2.449	2.413	2.369	2.53	2.559	2.553	2.699	2.703	2.658	2.458	2.563	2.353	2.533	2.51	2.494
pos_646	Ile-Glu-Thr-Asp-fluoromethyl ketone	-	metab_3335	B(ii)	-	-	HMDB0253396	M+NH4, M+Na	C20H33FN4O9	6.2267	-	-	pos	-	-	-	-	Organic acids and derivatives	Peptidomimetics	510.254	0.144018	0	36.6	-6.24868	-	Hybrid peptides	3.174	2.965	3.109	2.7	2.451	2.357	3.196	2.837	2.718	2.357	2.675	3.005	3.03	2.937	2.726	2.631	2.973	2.56	2.794	2.898	2.914
pos_647	Dhghab	-	metab_3336	B(ii)	-	-	HMDB0243628	M+H-H2O, M+ACN+H	C22H17N5O8	6.2029	-	-	pos	-	-	-	-	Phenylpropanoids and polyketides	Coumarins and derivatives	462.1	0.0590401	0	30.7	-9.21023	-	Furanocoumarins	2.25	2.843	1.704	2.092	2.481	1.671	2.276	1.99	2.514	2.669	2.191	1.522	2.004	2.018	2.046	2.193	2.161	1.733	2.303	2.338	2.354
pos_677	4-[(E)-2-(7-Heptoxy-4,4-dimethyl-1,1-dioxo-2,3-dihydrothiochromen-6-yl)prop-1-enyl]benzoic acid	4-[（E）-2-（7-庚基-4,4-二甲基-1,1-二氧代-2,3-二氢硫色烯-6-基）丙-1-烯基]苯甲酸	metab_3369	B(ii)	-	-	HMDB0254074	M+NH4, M+Na	C28H36O5S	6.6072	-	-	pos	-	-	-	-	Not Available	Not Available	507.221	0.0847479	0	35	7.19964	-	Not Available	3.851	4.319	3.383	3.655	3.913	3.684	3.159	3.038	3.99	3.687	3.813	3.042	3.675	3.967	3.626	3.579	3.509	3.038	3.739	3.794	3.81
pos_1302	Glutamic acid-betaxanthin	谷氨酸-甜菜黄素	metab_338	B(ii)	-	-	HMDB0304683	M+CH3OH+H	C14H16N2O8	4.1837	-	-	pos	-	-	-	-	Organic acids and derivatives	Carboxylic acids and derivatives	373.126	0.0578838	0	36.4	5.43971	-	Amino acids, peptides, and analogues	3.036	2.537	2.897	2.83	2.792	2.986	3.045	2.94	3.137	2.969	3.156	3.099	3.077	3.116	3.008	3.156	3.039	2.996	2.993	3.027	2.979
pos_7	9S,10S,11R-trihydroxy-12Z-octadecenoic acid	9S，10S，11R -三羟基- 12Z -十八碳烯酸	metab_3394	B(i)	-	-	LMFA02000011	M+H-2H2O, M+H-H2O, M+, M+Na, M+NH4, 2M+Na	C18H34O5	7.1468	-	-	pos	-	-	-	-	-	-	353.23	0.025537	67.5	0	1.02041	-	-	4.477	4.373	4.709	4.673	4.799	4.74	4.699	4.806	4.602	4.668	4.732	4.769	4.858	4.597	4.805	4.786	4.886	4.67	4.73	4.708	4.719
pos_1304	2,2,6,7-Tetramethylbicyclo[4.3.0]nona-1(9),4-diene-7,8-diol	2,2,6,7-四甲基双环[4.3.0]壬-1（9），4-二烯-7,8-二醇	metab_340	B(ii)	-	-	HMDB0036686	M+H	C13H20O2	4.2291	-	-	pos	-	-	-	-	Organic oxygen compounds	Organooxygen compounds	209.154	0.0572291	0	45.1	1.78335	99901-24-3	Alcohols and polyols	2.301	2.838	0.3285	1.581	1.234	2.353	0.5016	0.3347	1.036	0.7755	0.6635	0.3654	0.3981	1.203	1.372	1.128	1.219	1.27	1.846	1.848	1.804
pos_706	N-gamma-Glutamyl-S-trans-(1-propenyl)cysteine	N-γ-谷氨酰基-S-反式-（1-丙烯基）半胱氨酸	metab_3402	B(ii)	-	-	HMDB0040557	M+H, M+CH3OH+H	C11H18N2O5S	6.9492	-	-	pos	-	-	-	-	Organic acids and derivatives	Carboxylic acids and derivatives	323.129	0.0310797	0	35.3	5.34913	134677-41-1	Amino acids, peptides, and analogues	3.689	3.196	3.251	3.252	3.459	3.336	3.472	3.528	3.975	3.776	3.787	3.659	3.152	3.229	3.579	3.707	3.366	3.404	3.585	3.598	3.612
pos_707	D-Linalool 3-(6''-malonylglucoside)	D-芳樟醇3-（6’’-丙二酰葡萄糖苷）	metab_3403	B(ii)	-	-	HMDB0040729	M+NH4, M+Na	C19H30O9	6.8665	-	-	pos	-	-	-	-	Lipids and lipid-like molecules	Fatty Acyls	420.224	0.0682312	0	33.1	2.2668	-	Fatty acyl glycosides	3.428	3.547	3.071	3.493	3.412	3.879	3.258	2.732	3.473	3.006	3.626	3.056	3.456	3.63	3.498	3.456	3.556	2.875	3.417	3.45	3.476
pos_718	2-Hexylidenecyclopentanone	2 -己基环戊酮	metab_3415	B(ii)	-	-	HMDB0031728	M+H-H2O, M+H	C11H18O	7.1353	-	-	pos	-	-	-	-	Organic oxygen compounds	Organooxygen compounds	149.133	0.0433517	0	34.4	1.69196	17373-89-6	Carbonyl compounds	2.339	2.212	2.646	2.608	2.754	2.546	2.521	2.672	2.55	2.51	2.678	2.757	2.782	2.552	2.799	2.775	2.83	2.654	2.701	2.664	2.68
pos_1306	Ifenprodil	苄哌酚醇	metab_342	B(ii)	-	-	HMDB0253384	M+ACN+Na	C21H27NO2	4.2291	-	-	pos	-	-	-	-	Organoheterocyclic compounds	Piperidines	389.218	0.11143	0	64.6	-6.48335	-	Benzylpiperidines	2.407	2.568	1.75	1.874	1.815	2.251	2.063	1.925	2.184	2.027	2.149	2.033	1.46	2.034	2.139	2.153	2.108	1.91	2.144	2.136	2.054
pos_730	9-F1-phytoprostane	9-F1-植霜烷	metab_3429	B(ii)	-	-	HMDB0304641	M+H, 2M+Na	C18H32O5	7.3091	-	-	pos	-	-	-	-	Lipids and lipid-like molecules	Fatty Acyls	329.231	0.0865969	0	66.8	-2.3733	-	Eicosanoids	1.623	2.276	1.323	1.363	1.449	1.345	1.401	1.476	1.363	1.328	1.656	1.454	1.543	2.256	2.424	1.982	2.176	1.307	1.721	1.685	1.759
pos_74	1-O-Isopentyl-3-O-octadec-2-enoyl glycerol	1 - O -异戊基- 3 - O -十八碳- 2 -烯酰基甘油	metab_3439	B(ii)	-	-	HMDB0302897	M+H, M+K, M+NH4, M+Na	C26H50O4	10.2113	-	-	pos	-	-	-	-	Lipids and lipid-like molecules	Glycerolipids	427.378	0.086197	0	58.5	-0.263486	-	Diradylglycerols	5.536	5.585	5.577	5.637	5.651	5.597	5.472	5.48	5.368	5.527	5.439	5.503	5.605	5.534	5.516	5.453	5.511	5.438	5.568	5.496	5.519
pos_1310	Kaempferol 3-(2''-rhamnosyl-6''-acetylgalactoside) 7-rhamnoside	山奈酚3-（2’’-鼠李糖基-6’’-乙酰半乳糖苷）7-鼠李糖苷	metab_347	B(ii)	-	-	HMDB0040541	M+ACN+H	C35H42O20	4.2746	-	-	pos	-	-	-	-	Phenylpropanoids and polyketides	Flavonoids	824.255	0.103358	0	53.9	-7.61409	124027-50-5	Flavonoid glycosides	3.066	2.343	2.721	3.053	3.016	3.042	2.913	3.034	3.127	2.99	2.989	2.859	2.641	2.604	2.56	2.884	2.815	2.993	2.973	2.917	2.886
pos_783	Periplogenin	杠柳苷元	metab_3487	B(ii)	-	-	HMDB0256345	M+H-2H2O, M+H	C23H34O5	8.3276	-	-	pos	-	-	-	-	Lipids and lipid-like molecules	Steroids and steroid derivatives	391.245	0.0407616	0	37.5	-6.85473	-	Steroid lactones	3.087	3.437	2.892	3.036	3.071	2.972	2.915	2.901	3.101	3.142	3.118	2.933	3.007	3.08	3.146	2.995	3.291	2.841	3.086	3.077	3.111
pos_789	Arginylglutamine	精氨酰谷氨酰胺	metab_3493	B(ii)	-	-	HMDB0028707	M+H, M+Na	C11H22N6O4	8.3841	-	-	pos	-	-	-	-	Organic acids and derivatives	Carboxylic acids and derivatives	325.141	0.0430994	0	53.4	2.51875	2483-17-2	Amino acids, peptides, and analogues	3.034	3.597	1.27	2.531	2.623	2.463	2.772	2.136	2.53	2.573	2.515	1.747	2.193	2.799	2.88	2.485	2.702	1.75	2.842	2.804	2.825
pos_791	Gingerglycolipid A	姜糖脂A	metab_3496	B(ii)	-	-	LMGL04010019;HMDB0041093	M+NH4, M+Na	C33H56O14	8.4066	-	-	pos	-	-	-	-	Lipids and lipid-like molecules	Glycerolipids	699.359	0.0367914	0	36.4	4.64271	145937-22-0	Glycosylglycerols	3.982	4.762	3.721	3.636	3.919	3.946	3.604	3.839	3.914	4.081	3.869	3.898	3.667	3.545	3.871	3.696	3.985	3.575	4.011	4.009	4.037
pos_1313	Malvidin 3-alpha-L-galactoside	锦葵素3 - α - L -半乳糖苷	metab_350	B(ii)	-	-	HMDB0303038	M+H-H2O	C25H27O10+	4.286	-	-	pos	-	-	-	-	Phenylpropanoids and polyketides	Flavonoids	470.159	0.126182	0	32.3	4.6455	-	Flavonoid glycosides	2.493	2.706	0.9065	1.607	1.517	2.31	2.032	2.207	2.543	1.922	2.891	2.329	1.917	2.471	2.342	2.501	1.567	1.448	2.296	2.374	2.272
pos_795	LysoPC(18:3(9Z,12Z,15Z)/0:0)	-	metab_3500	B(ii)	-	-	HMDB0010388	M+H, M+Na	C26H48NO7P	8.4977	-	-	pos	-	-	-	-	Lipids and lipid-like molecules	Glycerophospholipids	518.325	0.0330852	0	43.1	2.25349	-	Glycerophosphocholines	3.596	4.179	3.092	3.148	3.134	3.267	3.234	2.973	3.641	3.512	3.66	2.96	2.804	3.483	3.489	3.438	3.446	2.947	3.468	3.447	3.474
pos_796	5-(4-Chloro-3-hydroxy-1-butynyl)-2,2'-bithiophene	5-（4-氯-3-羟基-1-丁酰基）-2,2'-联噻吩	metab_3501	B(ii)	-	-	HMDB0033269	M+H-H2O, M+H	C12H9ClOS2	8.5092	-	-	pos	-	-	-	-	Organoheterocyclic compounds	Bi- and oligothiophenes	268.986	0.207119	0	36.6	-0.121897	1020-03-7	Not Available	2.412	2.892	1.177	1.916	1.94	1.606	1.989	1.82	2.366	2.101	2.167	1.769	2.183	2.351	2.339	2.09	2.036	1.528	2.197	2.306	2.379
pos_8	(11E,15Z)-9,10,13-Trihydroxy-11,15-octadecadienoic acid	（11E，15Z）-9,10,13-三羟基-11,15-十八碳二烯酸	metab_3505	B(i)	-	-	-	M+H-2H2O, M+H-H2O, M+K, M+NH4, M+, 2M+Na	C18H32O5	6.8665	-	-	pos	-	-	-	-	-	-	293.212	0.0291262	64.9	0	1.3006	-	-	3.438	3.4	3.644	3.729	3.926	3.634	3.614	3.675	3.6	3.574	3.777	3.675	3.897	3.669	3.812	3.787	3.937	3.629	3.72	3.696	3.714
pos_1315	Salicylamide glucuronide	水杨酰胺葡萄糖醛酸苷	metab_352	B(ii)	-	-	HMDB0257458	M+ACN+H	C13H15NO8	4.3088	-	-	pos	-	-	-	-	Organic oxygen compounds	Organooxygen compounds	355.115	0.125177	0	42.9	5.68246	-	Carbohydrates and carbohydrate conjugates	2.692	2.22	2.491	2.51	2.493	2.685	2.721	2.587	2.923	2.669	2.889	2.704	2.741	2.776	2.726	2.896	2.729	2.638	2.627	2.737	2.696
pos_816	LysoPC(0:0/18:2(9Z,12Z))	-	metab_3524	B(ii)	-	-	HMDB0061700	M+H, M+Na	C26H50NO7P	8.7382	-	-	pos	-	-	-	-	Lipids and lipid-like molecules	Glycerophospholipids	520.34	0.0443713	0	45.3	1.06611	27304-12-7	Glycerophosphocholines	4.434	4.863	4.033	3.949	3.845	4.028	4.128	3.889	4.419	4.348	4.414	3.831	3.55	4.193	4.292	4.303	4.245	3.912	4.262	4.225	4.236
pos_1319	2-(beta-D-Mannopyranosyl)-L-tryptophan	2-（β-D-吡喃甘露糖基）-L-色氨酸	metab_356	B(ii)	-	-	HMDB0258059	M+H-H2O	C17H22N2O7	4.3656	-	-	pos	-	-	-	-	Organoheterocyclic compounds	Pyridines and derivatives	349.14	0.0888622	0	39	1.12282	-	Phenylpyridines	2.213	2.316	1.77	2.044	1.702	2.025	2.079	1.724	2.111	2.02	2.278	1.997	2.052	2.379	2.168	2.155	2.145	1.945	2.113	2.15	2.073
pos_855	Anapear	安纳皮尔	metab_3567	B(ii)	-	-	HMDB0040285	M+H, M+NH4	C9H14O2	9.064	-	-	pos	-	-	-	-	Lipids and lipid-like molecules	Fatty Acyls	172.133	0.0116394	0	39.8	-0.805105	189440-77-5	Fatty acid esters	2.755	3.048	1.179	2.668	3.006	2.513	2.866	2.026	2.882	0.9521	2.188	2.913	3.053	2.805	2.382	2.242	2.305	1.546	2.717	2.725	2.716
pos_861	4-(Dodecylamino)Phenol	4-（十二烷基氨基）苯酚	metab_3574	B(ii)	-	-	HMDB0256035	M+H, M+Na	C18H31NO	9.1334	-	-	pos	-	-	-	-	Organic nitrogen compounds	Organonitrogen compounds	278.248	0.0419675	0	30.7	-0.260063	-	Amines	3.85	3.755	3.921	4.018	4.024	3.884	3.867	3.861	3.852	3.764	3.802	3.849	3.966	3.923	3.864	3.928	3.969	3.826	3.913	3.878	3.886
pos_1320	Arginylglycine	精氨酰甘氨酸	metab_358	B(ii)	-	-	HMDB0028709	2M+ACN+H	C8H17N5O3	4.3656	-	-	pos	-	-	-	-	Organic acids and derivatives	Carboxylic acids and derivatives	504.302	0.221013	0	34.6	4.073	2418-67-9	Amino acids, peptides, and analogues	2.165	2.242	2.25	2.396	2.143	2.202	2.163	2.153	1.876	2.246	2.073	2.246	2.341	2.271	2.19	2.044	2.024	1.966	2.213	2.177	2.021
pos_87	Rivenprost	瑞文普罗斯特	metab_3583	B(ii)	-	-	HMDB0257249	M+NH4, M+K, M+Na, M+H	C24H34O6S	4.9743	-	-	pos	-	-	-	-	Benzenoids	Benzene and substituted derivatives	473.2	0.0331633	0	33.5	6.80607	-	Benzylethers	4.984	5.256	4.236	4.424	4.623	4.846	4.292	3.514	4.162	4.116	4.357	4.087	4.297	4.782	4.775	4.429	4.482	4.129	4.649	4.673	4.675
pos_1322	Glyzarin	甘草苷	metab_360	B(ii)	-	-	HMDB0029534;LMPK12050004	M+CH3OH+H	C18H14O4	4.377	-	-	pos	-	-	-	-	Phenylpropanoids and polyketides	Isoflavonoids	327.123	0.128883	0	60.7	0.36451	62820-28-4	Isoflav-2-enes	2.628	2.277	2.177	2.267	2.183	2.406	2.429	2.381	2.661	2.517	2.56	2.528	2.198	2.348	2.326	2.506	2.289	2.469	2.428	2.461	2.349
pos_889	2-Linoleoyl Glycerol	2 -亚油酰甘油	metab_3604	B(i)	-	-	HMDB0245187	M+H-H2O, M+H	C21H38O4	9.2852	-	-	pos	-	-	-	-	Lipids and lipid-like molecules	Fatty Acyls	355.284	0.0267924	75.2	0	-1.34102	-	Lineolic acids and derivatives	4.387	4.786	4.194	4.266	4.397	4.249	4.217	4.263	4.369	4.54	4.448	4.22	4.244	4.324	4.527	4.34	4.469	4.063	4.392	4.369	4.386
pos_908	(+/-)-(Z)-2-(5-Tetradecenyl)cyclobutanone	-	metab_3626	B(ii)	-	-	HMDB0037543	M+H, M+H-H2O	C18H32O	9.5547	-	-	pos	-	-	-	-	Organic oxygen compounds	Organooxygen compounds	265.253	0.0191237	0	42	0.918723	173074-85-6	Carbonyl compounds	4.823	4.724	4.799	4.922	4.88	4.791	4.809	4.801	4.678	4.771	4.667	4.802	4.894	4.826	4.774	4.751	4.829	4.734	4.824	4.807	4.815
pos_1326	(2S,3R,4R,5S,6S)-2-(Hydroxymethyl)-6-phenylmethoxyoxane-3,4,5-triol	（2S，3R，4R，5S，6S）-2-（羟甲基）-6-苯基甲氧基氧烷-3,4,5-三醇	metab_364	B(ii)	-	-	HMDB0243491	M+H-H2O	C13H18O6	4.4341	-	-	pos	-	-	-	-	Organic oxygen compounds	Organooxygen compounds	253.108	0.0894917	0	38.6	2.63622	-	Carbohydrates and carbohydrate conjugates	2.359	1.972	2.33	2.548	2.457	2.467	2.327	2.202	2.523	2.249	2.625	2.25	2.628	2.558	2.509	2.487	2.395	2.226	2.381	2.43	2.458
pos_925	N-Hexadecanoylpyrrolidine	N -十六烷酰基吡咯烷	metab_3645	B(ii)	-	-	HMDB0032740	M+Na, 2M+H	C20H39NO	9.8303	-	-	pos	-	-	-	-	Organoheterocyclic compounds	Pyrrolidines	332.292	0.202599	0	37.9	-0.175708	70974-48-0	N-acylpyrrolidines	4.65	4.506	4.757	4.789	4.761	4.475	4.569	4.557	4.401	4.425	4.386	4.544	4.521	4.467	4.438	4.517	4.518	4.47	4.665	4.5	4.546
pos_1327	5-O-p-Coumaroylnigrumin	5-O-p-Coumaroylnigrumin	metab_365	B(ii)	-	-	HMDB0038730	2M+K	C20H23NO9	4.4455	-	-	pos	-	-	-	-	Phenylpropanoids and polyketides	Tannins	881.237	0.141621	0	35.3	-0.685531	-	Not Available	1.693	1.086	0.6919	2.404	0.9867	2.131	1.435	2.231	1.167	0.6555	1.601	0.5979	0.8698	1.441	1.057	1.232	2.233	2.249	1.524	1.624	1.64
pos_933	LysoPA(18:2(9Z,12Z)/0:0)	-	metab_3654	B(ii)	-	-	HMDB0007856	M+H, M+Na	C21H39O7P	9.9308	-	-	pos	-	-	-	-	Lipids and lipid-like molecules	Glycerophospholipids	457.233	0.260787	0	39.7	1.38269	-	Glycerophosphates	4.074	4.006	4.247	4.115	4.022	3.672	3.895	4.047	3.895	3.802	3.944	3.89	3.83	3.95	4.051	4.005	4.091	3.804	4.155	3.933	4.022
pos_952	N-Oleoyl Arginine	N -油酰基精氨酸	metab_3675	B(ii)	-	-	HMDB0241954	M+H, M+ACN+Na	C24H46N4O3	10.1326	-	-	pos	-	-	-	-	Not Available	Not Available	502.374	0.15645	0	53.5	3.7615	-	Not Available	2.961	3.12	2.848	2.996	2.944	2.985	2.766	2.663	2.75	2.949	2.837	2.767	2.929	2.89	2.952	2.709	2.855	2.663	2.955	2.915	2.818
pos_959	Menthyl ethylene glycol carbonate	薄荷基乙二醇碳酸酯	metab_3682	B(ii)	-	-	HMDB0036141	M+H-H2O, M+H	C13H24O4	10.2223	-	-	pos	-	-	-	-	Lipids and lipid-like molecules	Prenol lipids	245.175	0.0861852	0	36.4	1.03774	156324-78-6	Monoterpenoids	4.199	4.212	4.27	4.297	4.296	4.354	4.253	4.234	4.066	4.273	4.122	4.269	4.361	4.248	4.192	4.152	4.246	4.171	4.236	4.183	4.165
pos_1334	Cysteinyl-Tryptophan	半胱氨酰-色氨酸	metab_373	B(ii)	-	-	HMDB0028786	M+	C14H17N3O3S	4.5943	-	-	pos	-	-	-	-	Organic acids and derivatives	Carboxylic acids and derivatives	307.097	0.201126	0	38.1	-6.95317	-	Amino acids, peptides, and analogues	2.024	1.868	1.436	1.441	1.599	1.778	1.923	1.807	2.328	2.058	2.142	1.828	0.9953	1.615	1.761	2.026	1.755	1.787	1.826	1.854	1.981
neg_1000	Cyclo(-D-Tyr-Arg-Gly-Asp-Cys(carboxymethyl)-OH) sulfoxide	环（-D-Tyr-Arg-Gly-Asp-Cys（羧甲基）-OH）亚砜	metab_3730	B(ii)	-	-	HMDB0244621	M-H2O-H	C26H36N8O11S	7.468	-	-	neg	-	-	-	-	Organic acids and derivatives	Carboxylic acids and derivatives	649.211	0.258429	0	46.1	9.15905	-	Amino acids, peptides, and analogues	2.576	3.065	1.665	2.587	2.72	2.049	1.849	1.677	2.246	2.694	2.217	1.133	1.94	2.341	2.454	1.608	2.217	0.7078	2.582	2.486	2.352
neg_1007	Brassica napus non-fluorescent chlorophyll catabolite 3	甘蓝型油菜非荧光叶绿素分解代谢产物3	metab_3737	B(ii)	-	-	HMDB0040917	M+Cl	C34H38N4O8	7.2665	-	-	neg	-	-	-	-	Organoheterocyclic compounds	Tetrapyrroles and derivatives	665.243	0.160586	0	64.8	6.69205	173740-48-2	Not Available	1.456	1.559	0.9256	1.636	1.617	1.656	0.8137	0.7202	1.826	0.6521	1.734	0.6518	1.126	1.416	1.261	1.667	1.032	0.7198	1.602	1.521	1.47
neg_1017	Kanzonol N	坎佐诺	metab_3748	B(ii)	-	-	HMDB0041100	M+FA-H	C22H24O6	7.0983	-	-	neg	-	-	-	-	Phenylpropanoids and polyketides	Isoflavonoids	429.156	0.119221	0	35.1	0.194227	156250-71-4	O-methylated isoflavonoids	1.394	1.464	2.16	2.231	2.369	2.084	2.358	2.543	1.667	2.086	2.167	2.253	2.504	1.742	2.127	2.171	2.379	1.844	2.061	1.96	2
neg_1024	Ichangic acid 17-beta-D-glucopyranoside	鱼香酸17-β-D-吡喃葡萄糖苷	metab_3756	B(ii)	-	-	HMDB0037590	M+FA-H	C32H44O15	6.8933	-	-	neg	-	-	-	-	Lipids and lipid-like molecules	Prenol lipids	713.268	0.0673131	0	53.4	2.2442	-	Terpene glycosides	3.326	3.527	3.447	3.778	3.308	3.686	3.011	3.423	3.401	2.993	3.4	2.976	3.561	2.813	3.011	3.488	3.356	3.213	3.414	3.361	3.368
pos_1338	Dehydrocyanaropicrin	脱氢紫草素	metab_377	B(ii)	-	-	HMDB0035029	2M+ACN+Na	C19H20O6	4.6173	-	-	pos	-	-	-	-	Lipids and lipid-like molecules	Prenol lipids	752.27	0.158126	0	32	3.08086	35821-02-4	Terpene lactones	1.958	1.434	2.469	1.071	1.237	1.879	1.579	1.631	2.177	1.171	1.804	2.018	0.729	0.922	0.5973	1.833	1.837	2.727	1.973	1.877	1.846
pos_1339	Gamma-L-Glutamyl-S-(2-carboxy-1-propyl)cysteinylglycine	-	metab_378	B(ii)	-	-	HMDB0029394	M+ACN+Na	C14H23N3O8S	4.6286	-	-	pos	-	-	-	-	Organic acids and derivatives	Carboxylic acids and derivatives	457.137	0.0850359	0	30.9	1.68282	6710-22-1	Amino acids, peptides, and analogues	2.508	0.08717	2.258	2.551	2.356	2.224	2.324	2.254	2.693	2.118	2.658	2.311	2.465	2.35	2.133	2.539	2.505	2.289	2.425	2.406	2.476
neg_1049	Naringenin-7-O-Rutinoside	柚皮素- 7 - O -芸香糖苷	metab_3783	B(i)	-	-	MJDBOTE0001265	M-H	C27H32O14	6.659	-	-	neg	-	-	-	-	-	-	579.172	0.044199	34.8	0	0.905758	-	-	2.107	2.138	1.84	2.224	2.394	2.274	1.641	1.748	2.241	2.159	2.238	1.502	2.03	2.163	2.255	2.198	2.129	1.622	2.188	2.186	2.22
neg_1058	1-Methylinosine	1-甲基肌苷	metab_3793	B(ii)	-	-	HMDB0002721	M-H2O-H	C11H14N4O5	6.6257	-	-	neg	-	-	-	-	Nucleosides, nucleotides, and analogues	Purine nucleosides	263.079	0.0159987	0	55.9	0.243583	2140-73-0	Not Available	3.064	3.203	2.852	3.107	3.323	2.905	2.641	2.389	3.2	3.082	3.295	2.634	3.265	3.294	3.17	3.177	3.016	2.4	3.151	3.138	3.141
neg_1060	Levoglucosan	左旋葡聚糖	metab_3796	B(i)	-	-	HMDB0000640	M-H	C6H10O5	6.6145	-	-	neg	-	-	-	-	Organoheterocyclic compounds	Oxepanes	161.046	0.131048	46.4	0	5.52673	498-07-7	Not Available	2.291	2.609	2.166	2.388	2.617	2.245	2.122	2.002	2.561	2.395	2.684	2.203	2.493	2.591	2.651	2.566	2.337	2.064	2.388	2.483	2.496
neg_1061	4'-Methylliquiritigenin 7-rhamnoside	4 ' -甲基甘草素7 -鼠李糖苷	metab_3797	B(ii)	-	-	HMDB0040545	M+FA-H	C22H24O8	6.6033	-	-	neg	-	-	-	-	Phenylpropanoids and polyketides	Flavonoids	461.147	0.0198697	0	31	4.27287	83697-43-2	Flavonoid glycosides	2.992	3.186	2.403	2.995	3.15	2.638	2.512	2.32	3.152	2.881	3.191	2.447	3.108	3.202	3.136	3.145	2.927	2.263	3.066	3.049	3.059
neg_1068	Rhizoxin	根霉素	metab_3804	B(ii)	-	-	HMDB0257197	M+K-2H	C35H47NO9	6.5365	-	-	neg	-	-	-	-	Lipids and lipid-like molecules	Prenol lipids	662.274	0.0168186	0	63.7	-0.0274072	-	Terpene lactones	2.136	2.178	1.54	2.259	1.551	2.083	2.19	2.474	2.525	2.009	2.092	1.574	1.462	2.198	1.819	1.942	2.02	2.411	2.125	2.116	2.11
pos_1341	Delamanid	德拉曼尼	metab_381	B(ii)	-	-	HMDB0250966	M+ACN+H	C25H25F3N4O6	4.6401	-	-	pos	-	-	-	-	Organoheterocyclic compounds	Piperidines	576.206	0.261117	0	32.5	0.0253547	-	Phenylpiperidines	2.275	1.153	2.345	0.7094	1.387	2.167	2.012	2.447	2.613	1.744	2.254	2.301	1.649	1.8	1.493	2.331	1.577	2.494	1.973	2.138	2.206
neg_1076	(2R,4S)-2-Aminoformyl-6-fluoro-spiro[chroman-4,4'-imidazolidine]-2',5'-dione	（2R，4S）-2-氨基甲酰基-6-氟螺[色满-4,4'-咪唑烷]-2'，5'-二酮	metab_3813	B(ii)	-	-	HMDB0242567	M+FA-H	C12H10FN3O4	6.4695	-	-	neg	-	-	-	-	Organoheterocyclic compounds	Azolidines	324.066	0.109216	0	45.7	8.88124	-	Imidazolidines	1.568	1.596	1.261	1.457	1.634	1.317	1.239	0.7897	1.772	1.448	1.7	1.28	1.282	1.684	1.689	1.973	1.454	0.9273	1.489	1.443	1.535
neg_1078	2'-Deoxy-2'-fluorocytidine	2 ' -脱氧- 2 ' -氟胞苷	metab_3815	B(ii)	-	-	HMDB0245531	2M-H	C9H12FN3O4	6.4472	-	-	neg	-	-	-	-	Nucleosides, nucleotides, and analogues	Pyrimidine nucleosides	489.158	0.00524382	0	34.5	6.03958	-	Pyrimidine 2''-deoxyribonucleosides	2.804	1.762	2.632	2.815	2.89	2.71	2.858	2.976	3.167	3.002	2.964	3.073	2.651	2.334	2.761	2.938	2.807	2.854	2.869	2.865	2.869
neg_1082	4-methylthiobutyldesulfoglucosinolate	4 -甲硫基丁基脱硫醇葡萄糖苷	metab_3820	B(ii)	-	-	HMDB0304187	M-H2O-H	C12H23NO6S2	6.4137	-	-	neg	-	-	-	-	Organic oxygen compounds	Organooxygen compounds	322.076	0.0243785	0	30.2	-7.95244	-	Carbohydrates and carbohydrate conjugates	3.308	3.296	3.279	3.386	3.505	3.362	3.25	3.178	3.421	3.367	3.424	3.118	3.344	3.379	3.415	3.586	3.334	3.128	3.341	3.33	3.319
neg_1086	Histidylphenylalanine	组氨酰苯丙氨酸	metab_3824	B(ii)	-	-	HMDB0028892;HMDB0028997	M+Cl	C15H18N4O3	6.4027	-	-	neg	-	-	-	-	Organic acids and derivatives	Carboxylic acids and derivatives	337.109	0.219082	0	55.9	5.44959	16874-81-0;33367-37-2	Amino acids, peptides, and analogues	1.926	1.364	1.937	1.344	1.688	1.669	2.388	2.442	2.27	2.424	2.101	2.394	1.589	1.837	2.391	2.238	2.318	2.181	1.895	2.08	1.971
neg_1096	Calendoflavoside	卡伦多芬赛德	metab_3835	B(ii)	-	-	HMDB0037745	M+FA-H	C28H32O16	6.3144	-	-	neg	-	-	-	-	Phenylpropanoids and polyketides	Flavonoids	669.169	0.293418	0	31.3	2.25584	55033-90-4	Flavonoid glycosides	2.122	1.882	1.941	2.211	1.822	2.167	2.113	2.036	2.242	1.902	1.941	1.668	1.954	2.054	1.999	1.851	1.956	2.032	2.192	1.949	2.035
neg_1110	4-Amino-1H-imidazole-2-carboxamide	4 -氨基- 1H -咪唑- 2 -甲酰胺	metab_3852	B(ii)	-	-	HMDB0246339	M+Na-2H	C4H6N4O	6.1472	-	-	neg	-	-	-	-	Organic acids and derivatives	Carboxylic acids and derivatives	147.028	0.140094	0	30.2	-6.25947	-	Carboxylic acid derivatives	2.626	2.584	2.575	2.624	2.931	2.717	2.689	2.717	2.951	2.766	2.927	2.677	2.688	2.835	2.764	2.884	2.594	2.675	2.772	2.706	2.651
neg_1112	23-Hydroxyphysalolactone	23-羟基酸浆内酯	metab_3854	B(ii)	-	-	HMDB0031388	M+Na-2H	C28H39ClO9	6.1029	-	-	neg	-	-	-	-	Lipids and lipid-like molecules	Steroids and steroid derivatives	575.2	0.156716	0	52.6	-5.14315	118194-16-4	Steroid lactones	1.96	0.6661	1.993	3.158	1.992	2.742	2.736	2.249	2.185	0.7172	2.18	0.7169	2.886	1.029	1.893	2.171	2.853	1.632	2.342	2.206	2.279
neg_1135	Ustiloxin C	乌司他洛辛C	metab_3879	B(ii)	-	-	HMDB0041053	M+Na-2H	C23H34N4O10S	5.9909	-	-	neg	-	-	-	-	Organic acids and derivatives	Carboxylic acids and derivatives	579.174	0.0260813	0	32.8	-0.372908	158274-98-7	Amino acids, peptides, and analogues	3.837	3.958	3.809	4.053	4.225	4.086	3.585	3.855	4.063	3.986	4.094	3.657	3.745	3.939	3.881	3.936	3.838	3.647	3.952	3.975	3.963
neg_1139	Myo-inositol glutamate	肌醇谷氨酸	metab_3883	B(ii)	-	-	HMDB0254974	M-H	C11H17NO10	5.9797	-	-	neg	-	-	-	-	Organic acids and derivatives	Carboxylic acids and derivatives	322.076	0.111853	0	34.4	-6.27066	-	Amino acids, peptides, and analogues	1.178	0.8344	0.5292	1.174	1.519	0.9419	0.5712	0.5706	1.713	1.367	1.683	0.5542	1.52	1.518	1.245	1.508	0.5479	0.5296	1.435	1.522	1.453
neg_1141	PC(2:0/LTE4)	-	metab_3886	B(ii)	-	-	HMDB0288836	M+K-2H	C33H57N2O11PS	5.946	-	-	neg	-	-	-	-	Not Available	Not Available	757.292	0.185235	0	42.3	1.38875	-	Not Available	2.235	2.688	0.0006604	0.8425	1.108	2.478	0.009221	0.5393	0.6886	0.02098	0.2315	0.0007158	0.0005485	0.3535	0.9445	0.02547	1.557	1.499	1.62	1.464	1.587
neg_1143	O-Cresolphthalein complexone	-	metab_3888	B(ii)	-	-	HMDB0255845	M+Cl	C32H32N2O12	5.9237	-	-	neg	-	-	-	-	Organic acids and derivatives	Carboxylic acids and derivatives	671.169	0.0428253	0	33.4	6.68094	-	Pentacarboxylic acids and derivatives	2.842	2.93	2.545	2.869	2.815	2.853	2.587	2.615	2.925	2.826	2.811	2.419	2.581	2.872	2.729	2.699	2.714	2.478	2.824	2.795	2.829
neg_1159	Alilusem	阿利卢塞姆	metab_3904	B(ii)	-	-	HMDB0248137	M-H	C17H15ClN2O5S	5.8112	-	-	neg	-	-	-	-	Organoheterocyclic compounds	Quinolines and derivatives	393.028	0.0779449	0	41.6	-9.65203	-	Hydroquinolines	1.242	0.9421	0.9676	2.242	2.39	2.233	1.447	1.663	1.824	0.9993	2.335	0.999	2.357	2.031	2.302	2.413	1.869	0.9681	1.965	2.022	2.026
neg_1160	5-Taurinomethyl-2-thiouridine	5-牛磺酸甲基-2-硫尿苷	metab_3906	B(ii)	-	-	HMDB0011610	M-H	C12H19N3O8S2	5.7886	-	-	neg	-	-	-	-	Nucleosides, nucleotides, and analogues	Pyrimidine nucleosides	396.05	0.273353	0	32.2	-9.47238	497258-54-5	Not Available	1.759	1.282	1.303	1.348	1.748	2.178	2.166	1.358	1.584	1.337	2.021	1.337	1.227	1.551	2.083	2.152	1.912	1.748	1.552	1.784	1.659
neg_1168	Blood group A antigen type 2	血型A抗原2型	metab_3914	B(ii)	-	-	HMDB0247718	M-H2O-H	C28H48N2O20	5.7549	-	-	neg	-	-	-	-	Organic oxygen compounds	Organooxygen compounds	713.26	0.103135	0	37	-3.66839	-	Carbohydrates and carbohydrate conjugates	2.64	3.048	1.231	1.246	1.84	2.732	1.655	2.251	2.445	1.748	2.264	1.901	1.145	1.327	1.685	2.166	1.664	2.282	2.348	2.26	2.297
neg_1172	Beta-Citryl-L-glutamic acid	β -谷氨酰- L -谷氨酸	metab_3919	B(ii)	-	-	HMDB0241915;HMDB0013220	M-H	C11H15NO10	5.7437	-	-	neg	-	-	-	-	Organic acids and derivatives	Carboxylic acids and derivatives	320.06	0.181177	0	32.1	-6.40499	69281-09-0	Amino acids, peptides, and analogues	1.61	1.208	0.2779	1.807	1.545	1.626	0.3065	0.306	2.062	1.198	2.167	0.2948	1.902	2.131	1.495	1.556	0.9421	0.3308	1.803	1.748	1.646
neg_1173	Telenzepine	替仑西平	metab_3920	B(ii)	-	-	HMDB0258786	2M-H	C19H22N4O2S	5.7326	-	-	neg	-	-	-	-	Organoheterocyclic compounds	Benzodiazepines	739.282	0.264452	0	32	-5.24366	-	Not Available	1.88	0.9109	1.25	1.045	0.8403	1.905	1.644	1.941	1.579	0.8803	1.775	1.39	0.925	0.8359	1.476	1.602	1.76	1.949	1.639	1.569	1.408
neg_1181	N-gamma-Glutamyl-S-propylcysteine	N-γ-谷氨酰-S-丙基半胱氨酸	metab_3929	B(ii)	-	-	HMDB0039096	M+FA-H	C11H20N2O5S	5.7102	-	-	neg	-	-	-	-	Organic acids and derivatives	Carboxylic acids and derivatives	337.109	0.0183434	0	44.1	5.28431	91212-00-9	Amino acids, peptides, and analogues	2.597	2.664	2.59	2.549	2.558	2.707	2.862	2.911	2.66	2.679	2.58	2.73	2.594	2.613	2.869	2.796	2.789	2.648	2.687	2.699	2.703
neg_1194	N-Linoleoyl Methionine	N -亚油酰甲硫氨酸	metab_3943	B(ii)	-	-	HMDB0241981	M+K-2H	C23H41NO3S	5.6652	-	-	neg	-	-	-	-	Organic acids and derivatives	Carboxylic acids and derivatives	448.23	0.174987	0	34.9	0.807119	-	Amino acids, peptides, and analogues	2.012	2.097	0.7735	0.6847	0.8865	1.515	1.17	0.2157	0.2329	0.2071	0.1977	0.207	0.1667	1.687	1.836	1.026	1.219	0.1942	1.431	1.376	1.283
pos_1354	(S)-4',5,7-Trihydroxy-3'-prenylflavanone	（S） -4'，5,7-三羟基-3'-异戊烯基黄烷酮	metab_395	B(ii)	-	-	HMDB0029866	M+H-H2O	C20H20O5	4.7893	-	-	pos	-	-	-	-	Phenylpropanoids and polyketides	Flavonoids	323.127	0.064315	0	54.9	-2.56614	119240-82-3	Flavans	1.992	2.025	1.431	1.313	1.556	1.895	1.623	1.792	1.854	1.63	1.878	1.383	1.139	1.413	1.441	1.816	1.572	1.642	1.749	1.761	1.8
neg_1204	SPARSOMYCIN	稀疏霉素	metab_3955	B(ii)	-	-	HMDB0258407	2M-H	C13H19N3O5S2	5.6203	-	-	neg	-	-	-	-	Organoheterocyclic compounds	Diazines	721.146	0.267285	0	38.4	0.0416778	-	Pyrimidines and pyrimidine derivatives	1.766	1.056	1.642	2.125	2.27	2.288	1.695	2.143	1.994	2.394	2.166	1.114	1.407	1.145	1.919	2.145	2.025	1.083	2.108	1.937	1.905
neg_121	D-Alanyl glycine	D -丙氨酰甘氨酸	metab_3961	B(ii)	-	-	HMDB0302832	M-H2O-H, M-H	C5H10N2O3	1.0422	-	-	neg	-	-	-	-	Organic acids and derivatives	Carboxylic acids and derivatives	145.062	0.119709	0	51.4	3.4204	-	Amino acids, peptides, and analogues	2.387	2.563	3.04	2.763	2.911	2.981	2.769	2.71	2.82	2.529	3.083	2.946	3.349	2.717	2.986	2.827	2.82	2.357	2.858	2.762	2.782
neg_1233	Noradrenaline (L-)	去甲肾上腺素（L-）	metab_3987	B(ii)	-	-	HMDB0304710	M-H2O-H	C41H45O23+	5.4411	-	-	neg	-	-	-	-	Phenylpropanoids and polyketides	Flavonoids	886.21	0.242067	0	33.6	-7.6595	-	Flavonoid glycosides	1.783	1.288	1.316	1.341	1.305	1.353	2.577	2.44	1.452	1.804	1.325	1.558	1.239	1.3	1.331	1.377	1.341	2.612	1.546	1.405	1.359
neg_1235	GMP-N-epsilon-(N-alpha-acetyl lysine methyl ester) 5'-phosphoramidate	GMP-N-ε-（N-α-乙酰赖氨酸甲酯）5'-磷酰胺	metab_3989	B(ii)	-	-	HMDB0304375	M+Na-2H	C19H29N7O10P-	5.4299	-	-	neg	-	-	-	-	Organic acids and derivatives	Carboxylic acids and derivatives	567.143	0.0348914	0	42.7	-4.8682	-	Amino acids, peptides, and analogues	2.371	1.76	2.495	2.005	1.795	1.998	2.118	3.148	2.705	2.228	2.178	2.529	1.773	1.974	1.948	2.144	1.774	3.212	2.465	2.451	2.435
neg_1240	Desmethyl Bosentan	去甲基波生坦	metab_3995	B(ii)	-	-	HMDB0251051	M+FA-H	C26H27N5O6S	5.3736	-	-	neg	-	-	-	-	Organoheterocyclic compounds	Diazines	582.167	0.193696	0	47.5	0.904362	-	Pyrimidines and pyrimidine derivatives	2.572	2.538	2.292	2.443	2.533	2.47	2.305	2.638	2.56	1.904	2.468	2.235	2.373	2.054	2.144	2.419	2.065	2.337	2.483	2.349	2.34
neg_1243	Cichorioside B	菊苣萜苷B	metab_3998	B(ii)	-	-	HMDB0302050	M-H2O-H	C21H28O10	5.3396	-	-	neg	-	-	-	-	Organic oxygen compounds	Organooxygen compounds	421.151	0.0695766	0	30.3	0.856475	-	Carbohydrates and carbohydrate conjugates	1.964	2.01	1.944	1.49	1.194	1.356	1.943	2.054	2.244	1.929	1.813	2.028	1.604	2.003	1.81	1.918	1.894	1.713	1.979	1.928	1.929
pos_1359	Val Ile Ile	缬氨酸 异亮氨酸 异亮氨酸	metab_400	B(i)	-	-	-	M+H	C17H33N3O4	4.8584	-	-	pos	-	-	-	-	-	-	344.255	0.0866615	37.1	0	1.06786	-	-	2.159	2.298	2.201	2.071	2.219	2.132	1.883	1.936	1.909	2.367	2.24	1.964	2.259	2.436	2.393	2.202	2.36	1.947	2.135	2.195	2.128
neg_1259	Triglyceride palmitate	-	metab_4015	B(ii)	-	-	HMDB0259215	M+K-2H	C25H42O11	5.2054	-	-	neg	-	-	-	-	Organic acids and derivatives	Carboxylic acids and derivatives	555.22	0.0634267	0	32.8	-3.16095	-	Tetracarboxylic acids and derivatives	2	1.481	2.302	1.497	0.8184	2.019	1.784	2.285	2.221	2.174	1.811	2.124	1.476	1.594	1.71	1.886	1.766	2.142	2.008	1.954	1.982
neg_1270	Histidyltyrosine	组氨酸酪氨酸	metab_4028	B(ii)	-	-	HMDB0028897	2M+Hac-H	C15H18N4O4	5.1049	-	-	neg	-	-	-	-	Organic acids and derivatives	Carboxylic acids and derivatives	695.277	0.0678737	0	38.8	-4.05252	35979-00-1	Amino acids, peptides, and analogues	3.389	3.397	0.8741	3.398	1.76	3.576	1.044	0.9245	1.91	0.905	1.866	0.9046	0.8848	2.047	1.367	1.811	1.819	2.489	2.786	2.752	2.728
neg_1272	Syringetin-3-O-Galactoside	丁香亭-3-O-半乳糖苷	metab_4030	B(i)	-	-	-	M-H	C23H24O13	5.0938	-	-	neg	-	-	-	-	-	-	507.117	0.119053	45.3	0	4.20894	-	-	1.701	0.03591	2.774	0.5322	0.4271	0.5039	0.09309	2.109	3.578	2.558	0.7586	3.014	0.03201	0.03692	0.0719	0.8919	0.04054	2.421	2.399	2.33	2.301
neg_1275	(3S,5R,6S,7E,9x)-7-Megastigmene-3,6,9-triol 9-glucoside	（3S，5R，6S，7E，9x）-7-巨斯的烯-3,6,9-三醇9-葡萄糖苷	metab_4033	B(ii)	-	-	HMDB0041176;LMFA13010057	M+FA-H	C19H34O8	5.0603	-	-	neg	-	-	-	-	Lipids and lipid-like molecules	Fatty Acyls	435.222	0.212087	0	34.6	-4.41005	-	Fatty acyl glycosides	1.971	2.532	0.4198	0.4367	0.9988	1.975	0.7776	0.4564	0.9135	0.4421	0.5633	0.4418	0.3716	1.446	1.762	1.288	0.4363	0.723	1.845	1.808	1.663
neg_1283	1-O-Cinnamoyl-beta-D-gentiobiose	1 - O -肉桂酰基- Beta - D -京尼平苷	metab_4042	B(ii)	-	-	HMDB0030295	M-H2O-H	C21H28O12	5.0045	-	-	neg	-	-	-	-	Phenylpropanoids and polyketides	Cinnamic acids and derivatives	453.14	0.245914	0	47.7	-0.861173	181373-65-9	Cinnamic acid esters	1.3	1.26	1.428	1.338	0.369	0.8284	1.841	0.5901	1.864	1.364	0.7169	0.3959	0.3305	0.3661	0.3848	1.481	0.6901	0.4065	1.401	1.277	1.204
neg_1291	Acuminoside	-	metab_4051	B(ii)	-	-	HMDB0029347	M-H2O-H	C21H36O10	4.971	-	-	neg	-	-	-	-	Lipids and lipid-like molecules	Prenol lipids	429.212	0.0846068	0	50.3	-1.54559	120163-17-9	Terpene glycosides	2.982	3.297	1.86	1.758	2.314	3.211	1.823	1.662	1.9	1.64	2.096	1.666	2.016	2.683	2.599	2.269	2.142	1.834	2.719	2.683	2.645
neg_1335	N,O-Didesmethylvenlafaxine	N、 邻二苯甲基文拉法辛	metab_4100	B(ii)	-	-	PW_C040611;HMDB0060852	2M-H	C15H23NO2	4.6143	-	-	neg	-	-	-	-	Organic oxygen compounds	Organooxygen compounds	497.335	0.0242787	0	31.3	-5.99471	135308-74-6	Alcohols and polyols	2.496	2.36	2.845	2.842	2.829	2.638	2.769	2.823	2.386	2.858	2.543	2.868	2.88	2.639	2.751	2.646	2.724	2.697	2.738	2.729	2.717
pos_1369	Coagulin R 3-glucoside	凝血素R 3-葡萄糖苷	metab_411	B(ii)	-	-	HMDB0033207	M+Na	C34H48O11	4.9858	-	-	pos	-	-	-	-	Lipids and lipid-like molecules	Steroids and steroid derivatives	655.306	0.108782	0	45.7	-4.2036	221695-66-5	Steroid lactones	3.205	3.197	1.579	1.323	1.93	2.338	1.908	0.1328	1.237	0.8619	2.059	1.135	1.364	2.803	2.814	2.338	1.991	0.701	2.479	2.394	2.407
neg_1347	5,6-Dihydro-5'-azacytidine	5，6 -二氢- 5 ' -氮杂胞苷	metab_4113	B(ii)	-	-	HMDB0246861	2M+Hac-H	C8H14N4O5	4.5585	-	-	neg	-	-	-	-	Organic oxygen compounds	Organooxygen compounds	551.21	0.116272	0	39	7.17632	-	Carbohydrates and carbohydrate conjugates	2.819	2.365	3.178	2.366	2.325	2.691	2.63	2.574	2.991	2.339	2.625	2.898	2.27	2.372	2.257	2.781	2.755	3.511	2.805	2.75	2.705
neg_1351	(2,5-Dihydroxypyrrol-1-yl) 5-[(3aS,4S,6aR)-2-oxo-1,3,3a,4,6,6a-hexahydrothieno[3,4-d]imidazol-4-yl]pentanoate	（2,5-二羟基吡咯-1-基）5-[（3aS，4S，6aR）-2-氧代-1,3,3a，4,6,6a-六氢噻吩并[3,4-d]咪唑-4-基]戊酸酯	metab_4118	B(ii)	-	-	HMDB0242491	2M-H	C14H19N3O5S	4.5141	-	-	neg	-	-	-	-	Organoheterocyclic compounds	Biotin and derivatives	681.206	0.0809402	0	50	5.47387	-	Not Available	2.215	1.985	1.924	1.897	1.461	1.909	2.033	1.799	2.083	1.574	1.979	1.978	0.9143	1.579	1.886	1.938	2.422	2.114	1.929	1.869	1.932
neg_1352	8-Acetoxypinoresinol 4-glucoside	8 -乙酰氧基松脂醇- 4 -葡萄糖苷	metab_4119	B(ii)	-	-	HMDB0033283	M+FA-H	C28H34O13	4.5141	-	-	neg	-	-	-	-	Lignans, neolignans and related compounds	Furanoid lignans	623.199	0.0804692	0	38.1	2.0442	-	Not Available	3.127	2.633	2.887	2.906	2.859	2.97	3.052	2.984	3.277	3.192	3.038	2.974	2.461	2.56	2.763	3.022	2.901	3.06	3.022	2.976	2.954
neg_1353	Sambacin	桑巴钦	metab_4120	B(ii)	-	-	HMDB0038883	M-H2O-H	C26H36O12	4.4808	-	-	neg	-	-	-	-	Organic oxygen compounds	Organooxygen compounds	521.2	0.0409293	0	42	-5.51073	85562-86-3	Carbohydrates and carbohydrate conjugates	2.783	2.418	2.754	2.622	2.521	2.921	2.732	3.023	2.954	2.403	2.791	2.687	2.654	2.655	2.45	2.926	2.757	3.167	2.802	2.775	2.769
neg_1360	3-((4-(5-(Hydroxymethyl)-2-oxo-3-oxazolidinyl)phenoxy)methyl)benzonitrile	3-（（4-（5-（羟甲基）-2-氧代-3-恶唑烷基）苯氧基）甲基）苯甲腈	metab_4128	B(ii)	-	-	HMDB0249397	2M-H	C18H16N2O4	4.3111	-	-	neg	-	-	-	-	Benzenoids	Phenol ethers	647.221	0.213824	0	37.7	8.94526	-	Not Available	2.732	3.349	0.3344	2.698	1.743	2.992	0.3668	0.7245	0.5001	0.7424	0.4341	0.3536	0.293	1.473	0.3432	0.3702	0.3487	0.3347	2.277	2.122	2.129
neg_1365	Cyclic N-Acetylserotonin glucuronide	-	metab_4133	B(ii)	-	-	HMDB0060812	2M+FA-H	C18H20N2O8	4.2753	-	-	neg	-	-	-	-	Organic oxygen compounds	Organooxygen compounds	829.246	0.236356	0	35.7	5.50546	-	Carbohydrates and carbohydrate conjugates	2.352	1.18	1.695	2.348	1.51	2.025	2.18	2.005	2.053	1.589	2.055	1.709	1.734	1.331	1.375	2.009	1.903	2.086	1.914	1.966	1.758
neg_1385	Ciluprevir	西卢普列维	metab_4155	B(ii)	-	-	HMDB0250248	M+K-2H	C40H50N6O8S	4.029	-	-	neg	-	-	-	-	Organic acids and derivatives	Carboxylic acids and derivatives	811.29	0.113389	0	51	0.669285	-	Amino acids, peptides, and analogues	3.023	3.533	0.3424	1.032	0.3951	3.341	0.3753	0.3748	0.4	0.7542	0.3479	0.3619	0.3003	0.3337	0.3513	0.7122	0.357	1.425	2.395	2.492	2.463
neg_1397	(1S,2S,4R,8S)-p-Menthane-1,2,8,9-tetrol 2-glucoside	（1S，2S，4R，8S）-p-薄荷烷-1,2,8,9-四醇2-葡萄糖苷	metab_4168	B(ii)	-	-	HMDB0039975	M+Na-2H	C16H30O9	3.9049	-	-	neg	-	-	-	-	Lipids and lipid-like molecules	Prenol lipids	387.163	0.00217159	0	36.5	-0.595223	402593-52-6	Terpene glycosides	3.374	2.496	3.301	3.427	3.317	3.381	3.328	2.867	3.313	2.537	3.309	3.076	3.294	3.424	3.201	3.176	3.243	3.121	3.232	3.23	3.231
pos_1374	Quinceoxepine	喹赛平	metab_417	B(ii)	-	-	HMDB0038107	M+CH3OH+H	C12H18O	5.0323	-	-	pos	-	-	-	-	Organic oxygen compounds	Organooxygen compounds	211.169	0.0889249	0	50.3	-1.43137	132925-10-1	Ethers	2.659	3.017	0.127	0.3198	2.059	2.408	0.02357	0.0221	0.03159	0.02961	0.03171	0.02502	0.6292	2.007	1.964	1.301	0.2178	0.02431	2.103	2.092	2.162
neg_1401	CID 9844747	CID 9844747	metab_4174	B(ii)	-	-	HMDB0252301	M+Cl	C22H26FN3O4	3.8497	-	-	neg	-	-	-	-	Organoheterocyclic compounds	Diazinanes	450.161	0.063075	0	63.2	1.13852	-	Piperazines	2.177	0.7371	1.371	1.914	2.018	2.142	1.704	0.8463	2.043	1.023	1.882	0.7898	1.545	2.099	1.311	1.816	1.489	1.103	1.713	1.667	1.668
neg_1402	Glutathionyl-3-hydroxykynurenine glucoside	谷胱甘肽- 3 -羟基犬尿氨酸葡萄糖苷	metab_4175	B(ii)	-	-	HMDB0062536;HMDB0062471	M-H	C26H36N4O15S	3.8387	-	-	neg	-	-	-	-	Lipids and lipid-like molecules	Fatty Acyls	675.181	0.0362073	0	52	-2.72563	244286-41-7	Fatty acyl thioesters	2.323	2.145	1.999	2.495	2.375	2.344	2.092	1.835	2.199	2.174	2.327	1.852	2.226	2.32	2.162	2.23	2.179	1.568	2.194	2.211	2.225
neg_1403	Hastatoside	戟叶马鞭草糖苷	metab_4176	B(ii)	-	-	HMDB0301945	M-H2O-H	C17H24O11	3.8055	-	-	neg	-	-	-	-	Lipids and lipid-like molecules	Prenol lipids	385.113	0.0989047	0	35	-2.53458	-	Terpene glycosides	1.837	1.18	1.78	1.538	1.271	2.349	2.232	2.191	2.032	1.761	1.706	2.006	0.8577	1.495	1.299	2.007	1.545	2.348	1.892	1.973	1.917
pos_1376	(+/-)-Conen	-	metab_419	B(ii)	-	-	HMDB0029614	M+CH3OH+H	C13H21O2PS2	5.0436	-	-	pos	-	-	-	-	Benzenoids	Benzene and substituted derivatives	337.106	0.0748217	0	33.8	2.7525	-	Not Available	2.632	2.611	2.111	2.419	2.401	2.479	2.43	2.485	2.8	2.556	2.741	2.301	2.201	2.48	2.573	2.641	2.622	2.423	2.499	2.55	2.561
neg_1438	3-Acetylphenol sulfate	-	metab_4213	B(ii)	-	-	HMDB0304930	M+FA-H	C8H8O5S	3.2742	-	-	neg	-	-	-	-	Organic oxygen compounds	Organooxygen compounds	261.007	0.209506	0	48.7	-0.357301	-	Carbonyl compounds	1.847	1.011	1.493	1.555	1.612	1.544	1.643	1.668	1.726	1.658	1.217	1.784	1.411	1.591	1.407	1.641	1.498	1.711	1.654	1.503	1.514
neg_1439	(2S)-4,5,7-Trihydroxy-2-(3,4,5-trihydroxyphenyl)-4H-chromen-3-one	（2S）-4,5,7-三羟基-2-（3,4,5-三羟基苯基）-4H-色烯-3-酮	metab_4214	B(ii)	-	-	HMDB0255326	M+FA-H	C15H12O8	3.263	-	-	neg	-	-	-	-	Phenylpropanoids and polyketides	Flavonoids	365.053	0.0711472	0	47.6	4.20628	-	Hydroxyflavonoids	2.313	1.877	1.715	2.316	2.123	2.059	1.881	0.7234	2.284	1.844	2.427	1.624	2.249	2.592	2.302	2.275	2.074	1.287	2.201	2.147	2.15
neg_1448	Dide-O-methylsimmondsin	二代邻甲基西蒙德辛	metab_4224	B(ii)	-	-	HMDB0041207	M+Na-2H	C14H21NO9	3.1635	-	-	neg	-	-	-	-	Organic oxygen compounds	Organooxygen compounds	368.099	0.0344033	0	62.2	8.83038	135074-86-1	Carbohydrates and carbohydrate conjugates	3.52	3.139	3.495	3.445	3.211	3.453	3.472	3.214	3.415	3.299	3.488	3.427	3.416	3.461	3.478	3.444	3.529	3.293	3.428	3.401	3.406
neg_1454	Benzothiadiazine	苯并噻二嗪	metab_4231	B(ii)	-	-	HMDB0249027	2M+FA-H	C7H6N2S	3.0976	-	-	neg	-	-	-	-	Benzenoids	Not Available	345.047	0.182558	0	46.2	-6.68952	-	Not Available	2.241	0.008398	2	0.1914	0.2959	1.254	2.278	2.004	1.837	1.06	0.009175	2.232	1.175	0.8044	0.2248	0.9663	1.252	2.582	1.934	1.784	1.92
pos_1380	Lys-Nap-OH	-	metab_424	B(i)	-	-	-	M+H	C24H25N3O6	5.1131	-	-	pos	-	-	-	-	-	-	452.181	0.052651	33.3	0	-2.11041	-	-	2.814	2.93	2.197	2.726	2.705	2.658	2.447	2.045	2.902	2.334	2.894	2.253	2.664	3.023	2.748	2.897	2.651	2.162	2.683	2.688	2.724
neg_1468	Urea glutamate	-	metab_4246	B(ii)	-	-	HMDB0259716	2M+FA-H	C6H9N3O5	2.6229	-	-	neg	-	-	-	-	Organic acids and derivatives	Carboxylic acids and derivatives	451.109	0.230053	0	72.4	6.36695	-	Amino acids, peptides, and analogues	0.4609	0.5917	0.4024	0.4189	1.981	2.125	0.4387	3.101	2.438	2.855	2.28	1.142	0.8574	2.726	0.4123	1.948	1.779	2.376	2.54	2.382	2.371
pos_1384	Ciceritol	菊苣酚	metab_428	B(ii)	-	-	HMDB0032777	M+H	C19H34O16	5.1711	-	-	pos	-	-	-	-	Organic oxygen compounds	Organooxygen compounds	519.188	0.124162	0	49.1	-7.69962	88167-26-4	Carbohydrates and carbohydrate conjugates	3.011	3.166	2.683	2.936	2.955	3.124	2.969	2.883	3.277	2.864	3.327	2.84	2.916	2.951	3.033	3.148	3.007	2.811	2.964	3.06	3.063
neg_1504	Naringin 6''-rhamnoside	柚皮苷6'-鼠李糖苷	metab_4285	B(ii)	-	-	HMDB0038048	M+K-2H	C33H42O18	1.2513	-	-	neg	-	-	-	-	Phenylpropanoids and polyketides	Flavonoids	763.189	0.136999	0	40.4	5.1293	-	Flavonoid glycosides	2.852	2.731	3.538	3.194	3.484	3.224	3.595	3.84	3.29	3.343	3.033	3.706	3.507	2.744	3.274	3.437	3.447	3.694	3.49	3.427	3.372
neg_1508	2-Keto-3-Deoxy-D-Mannooctanoic Acid	2 -酮基- 3 -脱氧- D -甘露辛酸	metab_4289	B(ii)	-	-	HMDB0250768	2M-H	C8H14O8	1.2513	-	-	neg	-	-	-	-	Organic oxygen compounds	Organooxygen compounds	475.131	0.079047	0	67	1.88562	-	Carbohydrates and carbohydrate conjugates	1.882	1.762	3.199	2.826	2.77	2.712	3.269	3.371	2.803	2.949	3.047	3.256	3.12	2.981	3.126	3.228	2.969	3.161	2.986	2.972	2.92
neg_1526	2-Amino-4-[carbamimidoyl(methyl)amino]butanoic acid	2-氨基-4-[氨基甲酰基（甲基）氨基]丁酸	metab_4308	B(ii)	-	-	HMDB0255374	M-H	C6H14N4O2	1.031	-	-	neg	-	-	-	-	Organic acids and derivatives	Carboxylic acids and derivatives	173.105	0.274734	0	78.5	2.13819	-	Amino acids, peptides, and analogues	0.4769	0.3997	1.588	1.455	1.654	1.32	1.075	1.117	0.9826	0.9105	1.302	1.765	1.843	1.191	1.625	1.257	1.635	0.8877	1.445	1.266	1.252
neg_1538	PG(i-22:0/LTE4)	-	metab_4321	B(ii)	-	-	HMDB0272121	M+Na-2H	C51H92NO13PS	0.9963	-	-	neg	-	-	-	-	Not Available	Not Available	1010.57	0.227939	0	36	-6.40379	-	Not Available	1.074	0.0006016	1.472	1.396	1.18	1.059	1.531	1.569	1.083	1.333	1.058	1.419	1.339	0.682	1.318	1.213	1.545	1.636	1.373	1.5	1.32
neg_1560	Hydroxymethyl hydrogen carbonate	羟甲基碳酸氢盐	metab_4346	B(ii)	-	-	HMDB0245465	M+Na-2H	C2H4O4	0.9732	-	-	neg	-	-	-	-	Organic acids and derivatives	Organic carbonic acids and derivatives	112.986	0.050998	0	73.6	2.8128	-	Carbonic acid monoesters	2.152	2.163	2.296	2.172	2.298	2.018	2.406	2.571	2.112	2.383	2.05	2.375	2.321	2.199	2.146	2.283	2.232	2.183	2.283	2.317	2.277
pos_1391	Z-Ile-Glu-Thr-Asp 7-amido-4-trifluoromethylcoumarin	Z-Ile-Glu-Thr-Asp 7-酰胺基-4-三氟甲基香豆素	metab_436	B(ii)	-	-	HMDB0249716	M+ACN+Na	C37H42F3N5O13	5.2411	-	-	pos	-	-	-	-	Benzenoids	Benzene and substituted derivatives	885.283	0.0937843	0	41	-6.74911	-	Phenylacetamides	2.537	1.742	1.996	2.267	1.914	2.232	2.526	2.254	2.771	2.305	2.595	2.325	2.118	2.251	2.067	2.395	2.442	2.311	2.298	2.36	2.377
neg_1609	Chlorocitric acid	氯柠檬酸	metab_4400	B(ii)	-	-	HMDB0242538	M+Na-2H	C6H7ClO7	0.884	-	-	neg	-	-	-	-	Organic acids and derivatives	Carboxylic acids and derivatives	246.962	0.116264	0	44.9	-4.83787	-	Tricarboxylic acids and derivatives	1.736	1.579	1.724	1.96	2.025	1.761	1.481	1.529	1.62	1.752	1.615	1.476	1.403	1.591	1.548	1.089	1.821	1.631	1.593	1.574	1.665
neg_161	Dihydro-5-propyl-2(3H)-furanone	二氢-5-丙基-2（3H）-呋喃酮	metab_4401	B(ii)	-	-	HMDB0031681	M-H, M+FA-H	C7H12O2	5.7774	-	-	neg	-	-	-	-	Organoheterocyclic compounds	Lactones	127.077	0.0339887	0	90.7	4.56093	57129-71-2	Gamma butyrolactones	4.064	4.019	3.682	3.915	3.985	4.106	4.102	3.813	4.015	3.978	4.071	3.742	3.811	3.951	4.086	4.124	4.016	4.01	3.987	4.003	4.017
neg_1614	5'-Iododeoxyuridine	5'-碘脱氧尿苷	metab_4406	B(ii)	-	-	HMDB0246882	M+K-2H	C9H11IN2O5	0.851	-	-	neg	-	-	-	-	Organoheterocyclic compounds	Diazines	390.92	0.162032	0	54	0.447373	-	Pyrimidines and pyrimidine derivatives	2.106	2.005	2.261	2.278	2.368	2.229	1.94	1.619	2.027	2.242	2.046	2.007	2.097	2.001	1.967	1.827	2.081	2.019	2.191	2.179	2.058
neg_179	Amioca	阿米奥卡	metab_4432	B(ii)	-	-	HMDB0248334	M-H, M+Cl	C42H72O36	6.0805	-	-	neg	-	-	-	-	Organic oxygen compounds	Organooxygen compounds	1187.36	0.181784	0	42	5.19674	-	Carbohydrates and carbohydrate conjugates	1.963	2.817	0.4954	1.546	1.37	1.032	0.536	0.5354	2.26	0.5197	2.329	0.5195	0.4421	1.949	0.5065	0.8031	0.9624	0.4957	1.86	1.795	1.702
neg_190	Demethyloleuropein	去甲基齐墩果酸	metab_4445	B(ii)	-	-	HMDB0036121	M+Na-2H, M+K-2H	C24H30O13	6.6368	-	-	neg	-	-	-	-	Lipids and lipid-like molecules	Prenol lipids	547.147	0.00364711	0	38.6	6.20872	52077-55-1	Terpene glycosides	4.73	4.878	4.313	4.667	4.987	4.429	4.127	3.922	4.934	4.664	5.044	4.173	4.863	4.999	4.831	4.836	4.608	3.924	4.779	4.775	4.777
neg_196	Corchorifatty acid F	科氏酸F	metab_4451	B(ii)	-	-	HMDB0035919	M-H, M+Na-2H	C18H32O5	6.8153	-	-	neg	-	-	-	-	Lipids and lipid-like molecules	Fatty Acyls	327.219	0.0094054	0	47.9	2.82054	95341-44-9	Lineolic acids and derivatives	4.207	4.154	4.544	4.527	4.625	4.482	4.597	4.651	4.407	4.504	4.491	4.682	4.698	4.498	4.703	4.602	4.765	4.541	4.538	4.546	4.542
neg_225	1-(Methylsulfinyl)propyl 2-propenyl disulfide	1-（甲基亚磺酰基）丙基2-丙烯基二硫化物	metab_4484	B(ii)	-	-	HMDB0033059	M+Na-2H, M+K-2H	C7H14OS3	8.9334	-	-	neg	-	-	-	-	Organosulfur compounds	Sulfoxides	230.995	0.109764	0	37.9	-2.55585	-	Not Available	2.658	2.728	2.718	2.954	3.047	2.899	2.522	2.681	2.898	2.859	2.848	2.468	3.099	2.936	2.916	2.97	2.836	2.76	2.843	2.792	2.888
neg_236	1-Palmitoyl Lysophosphatidic Acid	1 -棕榈酰溶血磷脂酸	metab_4496	B(i)	-	-	-	M-H, M+Na-2H	C19H39O7P	11.2994	-	-	neg	-	-	-	-	-	-	409.237	0.0980097	39.7	0	2.1026	-	-	2.741	2.351	2.819	2.745	2.674	2.604	2.885	2.811	3.002	2.572	2.92	2.855	2.853	2.732	2.869	2.811	3.045	2.533	2.788	2.702	2.747
pos_1405	Phenethyl rutinoside	苯乙基芦丁苷	metab_452	B(ii)	-	-	HMDB0032622	M+NH4	C20H30O10	5.4866	-	-	pos	-	-	-	-	Organic oxygen compounds	Organooxygen compounds	448.218	0.0331186	0	53.2	1.17442	88510-08-1	Carbohydrates and carbohydrate conjugates	1.729	1.945	0.2962	0.1626	1.543	1.581	1.064	0.1513	0.2048	0.1941	0.2054	0.5229	1.585	1.832	1.89	1.424	0.6733	0.1643	1.482	1.46	1.456
neg_258	1,2-Diphenyl tetrachloroethane	1，2 -二苯基四氯乙烷	metab_4520	B(ii)	-	-	HMDB0244092	M+FA-H, M-H	C14H10Cl4	11.2547	-	-	neg	-	-	-	-	Phenylpropanoids and polyketides	Stilbenes	316.949	0.0321423	0	31	7.92815	-	Not Available	2.933	2.784	3.12	3.068	3.098	2.997	3.04	3.105	2.907	3.142	2.871	3.135	3.217	2.982	3.034	3.009	3.057	3.035	3.04	3.022	3.013
neg_261	Vandetanib	凡德他尼	metab_4524	B(i)	-	-	-	M-H, M+Cl	C22H24BrFN4O2	6.0359	-	-	neg	-	-	-	-	-	-	509.073	0.13272	33.2	0	-6.18621	-	-	2.698	2.472	2.723	2.818	2.579	2.385	2.72	2.326	2.764	2.735	2.832	2.528	2.966	2.864	2.861	2.781	2.576	2.413	2.754	2.71	2.638
neg_292	6-O-Acetylarbutin	6-O-乙酰熊果酚苷	metab_4558	B(ii)	-	-	HMDB0034060	M-H, M+FA-H	C14H18O8	3.2521	-	-	neg	-	-	-	-	Organic oxygen compounds	Organooxygen compounds	359.098	0.0224994	0	50.2	0.316149	10338-88-2	Carbohydrates and carbohydrate conjugates	3.032	2.759	2.969	3.543	3.048	3.136	3.024	3.156	2.997	3.078	2.748	3.105	3.044	3.086	2.795	2.891	3.139	3.184	3.076	3.056	3.067
neg_306	Phenylpropiolic acid	苯丙炔酸	metab_4574	B(ii)	-	-	HMDB0002359	M+Cl, M+K-2H	C9H6O2	3.4512	-	-	neg	-	-	-	-	Benzenoids	Benzene and substituted derivatives	181.007	0.10888	0	36.3	3.31057	637-44-5	Not Available	2.67	2.652	2.968	2.954	2.977	2.828	2.755	2.801	2.431	3.009	2.513	2.882	3.083	2.74	2.836	2.649	2.851	2.56	2.803	2.723	2.724
neg_314	Ligustroside	女贞苷	metab_4583	B(ii)	-	-	HMDB0034751	M+Cl, M+FA-H	C25H32O12	3.7614	-	-	neg	-	-	-	-	Lipids and lipid-like molecules	Prenol lipids	569.189	0.0853639	0	49	2.35539	35897-92-8	Terpene glycosides	2.5	0.4876	2.329	2.417	2.364	2.463	2.54	2.461	2.65	2.095	2.446	2.608	2.647	2.475	2.3	2.652	2.277	2.482	2.414	2.439	2.365
neg_32	Maltoheptaose	麦芽七糖	metab_4589	B(i)	-	-	HMDB0013000	M-H, M+Cl, M+FA-H	C42H72O36	2.5896	-	-	neg	-	-	-	-	Organic oxygen compounds	Organooxygen compounds	1197.38	0.13491	51	0	4.12086	137767-17-0	Carbohydrates and carbohydrate conjugates	3.128	2.628	3.574	3.258	3.334	3.693	3.886	3.688	3.631	3.515	3.266	3.564	3.256	2.82	3.085	3.638	3.566	4.091	3.586	3.506	3.475
neg_323	Marmesin rhamnoside	马豆素鼠李糖苷	metab_4593	B(ii)	-	-	HMDB0039564	M-H2O-H, M-H	C20H24O8	3.9935	-	-	neg	-	-	-	-	Phenylpropanoids and polyketides	Coumarins and derivatives	373.127	0.099638	0	33.5	-5.67625	142347-99-7	Furanocoumarins	2.299	0.7864	2.299	1.771	1.906	2.166	2.373	2.449	2.504	2.248	2.217	2.568	1.627	1.469	1.726	2.177	1.842	2.532	2.225	2.151	2.231
pos_1412	Arphamenine B	苦瓜碱B	metab_460	B(ii)	-	-	HMDB0248615	M+K	C16H24N4O4	5.5811	-	-	pos	-	-	-	-	Organic acids and derivatives	Carboxylic acids and derivatives	375.144	0.150256	0	93.8	3.53236	-	Amino acids, peptides, and analogues	2.303	1.466	2.595	2.255	1.883	2.446	2.102	2.617	2.616	2.598	2.415	2.596	2.165	2.234	1.902	2.522	2.377	2.678	2.361	2.48	2.48
neg_341	Vestitone 7-glucoside	瑞斯蒂酮7 -葡萄糖苷	metab_4613	B(ii)	-	-	HMDB0033012	M-H2O-H, M-H	C22H26O9	4.2975	-	-	neg	-	-	-	-	Phenylpropanoids and polyketides	Isoflavonoids	415.14	0.0354197	0	49.4	0.374343	-	Isoflavonoid O-glycosides	3.085	2.12	2.927	2.776	2.559	2.724	2.999	3.001	3.206	2.841	2.807	3.123	2.646	2.464	2.388	2.814	2.581	3.071	2.874	2.878	2.849
neg_349	2beta,9xi-Dihydroxy-8-oxo-1(10),4,11(13)-germacratrien-12,6alpha-olide	2β，9xi-二羟基-8-氧代-1（10），4,11（13）-germacratrien-12,6α-内酯	metab_4621	B(ii)	-	-	HMDB0036662	M+Na-2H, M+FA-H	C15H18O5	4.4808	-	-	neg	-	-	-	-	Lipids and lipid-like molecules	Prenol lipids	299.093	0.133756	0	32.9	8.74374	-	Terpene lactones	2.06	0.8612	1.961	0.5582	0.4872	1.298	2.03	1.726	2.037	1.215	1.795	1.823	0.4415	1.299	1.236	1.479	0.5127	1.756	1.498	1.572	1.612
neg_357	4-Methoxybenzyl O-(2-sulfoglucoside)	4-甲氧基苄基-O-（2-磺基葡糖苷）	metab_4630	B(ii)	-	-	HMDB0034754	M-H2O-H, M-H	C14H20O10S	4.6143	-	-	neg	-	-	-	-	Organic oxygen compounds	Organooxygen compounds	379.068	0.0707968	0	33.7	-7.61909	-	Carbohydrates and carbohydrate conjugates	1.505	0.05097	2.024	0.005493	0.005037	0.04552	0.2902	2.633	2.626	1.616	0.01852	2.018	0.004294	0.004978	0.3887	0.2095	0.4146	2.747	1.909	1.875	1.849
neg_425	3-(Methylthio)propanal	3-（甲硫基）丙醛	metab_4706	B(ii)	-	-	HMDB0031857	3M-H	C4H8OS	3.0135	-	-	neg	-	-	-	-	Organic oxygen compounds	Organooxygen compounds	311.082	0.213766	0	46	2.35434	3268-49-3	Carbonyl compounds	2.171	2.028	2.226	2.418	2.41	2.384	2.301	2.115	2.296	2.088	2.329	2.302	2.551	2.454	2.407	2.537	2.35	2.019	2.439	2.388	2.251
neg_43	Isorhamnetin 3-O-[b-L-rhamnofuranosyl-(1->6)-D-glucopyranoside]	异鼠李素3-O-[b-L-鼠李呋喃糖基-（1->6）-D-吡喃葡萄糖苷]	metab_4711	B(ii)	-	-	HMDB0037744	M-H, M+Na-2H, M-H2O-H	C28H32O16	5.9909	-	-	neg	-	-	-	-	Phenylpropanoids and polyketides	Flavonoids	623.166	0.00792985	0	38.6	6.1387	37138-79-7	Flavonoid glycosides	4.36	4.464	4.312	4.578	4.752	4.599	4.091	4.385	4.579	4.482	4.614	4.111	4.286	4.468	4.391	4.443	4.345	4.131	4.481	4.477	4.474
neg_432	Dihydrodaidzein 7-O-glucuronide	二氢大豆苷元7-O-葡萄糖醛酸苷	metab_4714	B(ii)	-	-	HMDB0041722	M-H	C21H20O10	3.1635	-	-	neg	-	-	-	-	Phenylpropanoids and polyketides	Isoflavonoids	431.095	0.0710098	0	30.1	-8.07916	-	Isoflavonoid O-glycosides	2.494	2.048	2.021	2.223	1.887	2.263	2.242	1.77	2.163	2.007	2.263	2.088	2.089	2.355	2.131	2.149	2.251	2.041	2.208	2.15	2.165
neg_438	1h,8h-Pyrano[3,4-c]pyran-1,8-dione	1h，8h吡喃[3,4-c]吡喃-1,8-二酮	metab_4720	B(ii)	-	-	HMDB0244906	M+FA-H	C8H4O4	3.263	-	-	neg	-	-	-	-	Organoheterocyclic compounds	Pyrans	209.009	0.184507	0	52.3	-1.80313	-	Pyranones and derivatives	1.74	1.053	1.022	1.807	1.549	1.61	1.312	0.5663	1.747	1.078	2.03	0.4541	1.832	2.158	1.999	2.129	1.791	0.4321	1.836	1.706	1.705
neg_452	Mycotoxin T 2	真菌毒素T 2	metab_4736	B(ii)	-	-	HMDB0032864	M+K-2H	C16H23NO7	3.4622	-	-	neg	-	-	-	-	Organic oxygen compounds	Organooxygen compounds	378.095	0.134803	0	30.2	-3.68254	208346-80-9	Carbohydrates and carbohydrate conjugates	1.018	0.2694	1.772	1.737	1.776	1.475	2.406	2.448	1.846	1.761	1.874	2.22	2.116	2.031	2.394	2.256	2.033	1.894	2.033	1.943	1.93
neg_455	1-O-p-Coumaroyl-(b-D-glucose 6-O-sulfate)	1-O-对香豆酰基-（b-D-葡萄糖6-O-硫酸盐）	metab_4739	B(ii)	-	-	HMDB0041174	M-H	C15H18O11S	3.5285	-	-	neg	-	-	-	-	Phenylpropanoids and polyketides	Cinnamic acids and derivatives	405.05	0.263099	0	43	-0.207071	-	Hydroxycinnamic acids and derivatives	1.453	0.5559	1.544	1.095	1.237	0.5608	0.9746	1.016	2.182	1.701	0.9242	1.812	0.9664	1.79	0.5492	1.029	0.5514	1.409	1.408	1.478	1.251
pos_1426	4-Hydroxybenzyl isothiocyanate rhamnoside	4 -羟苯基异硫氰酸鼠李糖苷	metab_475	B(ii)	-	-	HMDB0032801	M+H-2H2O	C14H17NO5S	5.8077	-	-	pos	-	-	-	-	Organic oxygen compounds	Organooxygen compounds	276.069	0.218626	0	50.2	-0.82004	73255-40-0	Carbohydrates and carbohydrate conjugates	2.331	2.16	1.01	2.322	2.318	2.151	1.235	0.3203	2.365	2.11	2.508	1.012	2.356	2.49	2.417	2.134	2.253	1.698	2.111	2.263	2.302
neg_469	N-(N-Formyl-L-methionyl)-L-phenylalanine	N-（N-甲酰基-L-甲硫酰基）-L-苯丙氨酸	metab_4754	B(ii)	-	-	HMDB0252434	2M-H	C15H20N2O4S	3.8939	-	-	neg	-	-	-	-	Organic acids and derivatives	Carboxylic acids and derivatives	647.222	0.105321	0	53	0.603736	-	Amino acids, peptides, and analogues	2.49	2.572	0.4454	1.554	1.089	2.56	0.4838	0.4832	0.5123	0.4684	0.4518	0.4681	0.3954	1.556	1.434	0.4878	0.7828	0.4457	1.707	1.652	1.62
neg_476	1H-Pyrrole-2,5-dione, 3-(1-methyl-1h-indol-3-yl)-4-(1-methyl-6-nitro-1h-indol-3-yl)-	1H-吡咯-2,5-二酮，3-（1-甲基-1H-吲哚-3-基）-4-（1-甲基-6-硝基-1H-吲哚-3-基）-	metab_4762	B(ii)	-	-	HMDB0254796	2M-H	C22H16N4O4	3.9935	-	-	neg	-	-	-	-	Organoheterocyclic compounds	Indoles and derivatives	799.234	0.0532936	0	41.9	8.45137	-	N-alkylindoles	3.093	2.582	2.789	3.115	2.778	3.142	3.037	3.198	3.074	2.945	2.907	2.891	2.752	2.535	2.669	2.98	2.772	3.103	2.965	2.965	2.924
neg_480	Borapetoside	硼哌啶	metab_4767	B(ii)	-	-	HMDB0249346	M+FA-H	C26H34O12	4.0315	-	-	neg	-	-	-	-	Organoheterocyclic compounds	Naphthopyrans	583.203	0.0456648	0	57.4	-0.150106	-	Not Available	1.891	0.02268	0.8759	0.3889	0.2062	1.965	2.157	2.079	2.396	1.599	1.625	1.569	1.3	0.03971	0.9675	1.655	1.27	2.356	1.772	1.739	1.773
neg_481	3,6,9,12-Tetraazatetradecanedioic acid, 3,6,9,12-tetrakis(carboxymethyl)-	3,6,9,12-四氮杂十四烷二酸，3,6,9,12-四（羧甲基）-	metab_4768	B(ii)	-	-	HMDB0247535	M+K-2H	C18H30N4O12	4.098	-	-	neg	-	-	-	-	Organic acids and derivatives	Carboxylic acids and derivatives	531.136	0.0233936	0	48.6	3.4272	-	Hexacarboxylic acids and derivatives	3.272	3.345	3.056	3.254	3.019	3.377	2.97	2.816	3.144	2.693	3.287	3.032	2.949	3.374	3.027	3.21	3.174	2.879	3.161	3.162	3.144
neg_484	Cyanidin 3-O-[b-D-Xylopyranosyl-(1->2)-[(4-hydroxybenzoyl)-(->6)-b-D-glucopyranosyl-(1->6)]-b-D-galactopyranoside]	花青素3-O-[b-D-吡喃木糖基-（1->2）-[（4-羟基苯甲酰基）-（->6）-b-D-吡喃葡萄糖基-（1->6）]-b-D-吡喃半乳糖苷]	metab_4771	B(ii)	-	-	HMDB0041160	M-H2O-H	C39H43O22+	4.1423	-	-	neg	-	-	-	-	Phenylpropanoids and polyketides	Flavonoids	844.202	0.261308	0	39.3	-5.97863	142506-20-5	Flavonoid glycosides	2.288	2.136	1.969	2.41	0.2967	1.892	2.334	2.052	1.389	2.444	0.3072	1.817	1.571	1.996	0.5707	0.7326	2.019	1.85	2.051	1.827	1.93
neg_485	2''-Methoxy-(S)-oleuropein	2’’-甲氧基-（S）-橄榄苦苷	metab_4772	B(ii)	-	-	HMDB0035445	M-H2O-H	C26H34O14	4.1533	-	-	neg	-	-	-	-	Lipids and lipid-like molecules	Prenol lipids	551.177	0.0124772	0	46.9	0.554649	256498-10-9	Terpene glycosides	2.914	1.928	2.691	2.797	2.886	2.827	2.982	2.854	3.073	2.817	2.851	2.981	2.962	2.787	2.794	3.041	2.772	2.925	2.875	2.885	2.876
neg_488	N-Eicosapentaenoyl Threonine	N -二十碳五烯酰基苏氨酸	metab_4775	B(ii)	-	-	HMDB0242080	M-H2O-H	C24H37NO4	4.1867	-	-	neg	-	-	-	-	Not Available	Not Available	384.252	0.0396062	0	59.2	-6.4026	-	Not Available	2.486	2.272	2.649	2.743	2.648	2.477	2.677	2.7	2.28	2.688	2.397	2.73	2.846	2.516	2.565	2.502	2.551	2.593	2.6	2.57	2.571
neg_492	N-desmethyl loperamide	N -去甲基洛哌丁胺	metab_4780	B(ii)	-	-	HMDB0255118	M+FA-H	C28H31ClN2O2	4.2197	-	-	neg	-	-	-	-	Benzenoids	Benzene and substituted derivatives	507.208	0.0259206	0	62.2	5.8551	-	Diphenylmethanes	3.348	2.531	2.634	3.535	3.429	3.686	3.139	2.639	3.453	2.302	3.494	2.298	3.634	3.604	3.515	3.441	3.382	2.816	3.336	3.322	3.314
neg_495	Galactosylpyridinoline	半乳糖基吡啶啉	metab_4783	B(ii)	-	-	HMDB0252583	M+Cl	C24H38N4O13	4.2641	-	-	neg	-	-	-	-	Lipids and lipid-like molecules	Fatty Acyls	625.213	0.0119199	0	47.2	0.434469	-	Fatty acyl glycosides	2.688	2.202	1.846	2.032	1.705	2.593	2.584	2.61	2.891	2.396	2.423	2.2	0.8499	1.615	1.414	2.256	2.169	2.743	2.372	2.374	2.382
neg_499	Nikkomycin	烟霉素	metab_4787	B(ii)	-	-	HMDB0255605	M-H2O-H	C20H25N5O10	4.3111	-	-	neg	-	-	-	-	Lipids and lipid-like molecules	Steroids and steroid derivatives	476.14	0.107499	0	34.5	-5.64572	-	Bile acids, alcohols and derivatives	2.312	1.462	1.72	2.065	1.814	1.947	2.162	1.552	2.282	1.915	2.063	1.88	1.804	1.959	1.917	2.193	1.737	1.852	1.961	1.892	1.876
neg_508	1-O-Acetyl britannilactone	1 - O -乙酰大花旋覆花内酯	metab_4798	B(ii)	-	-	HMDB0243974	M+Na-2H	C17H24O5	4.5585	-	-	neg	-	-	-	-	Lipids and lipid-like molecules	Prenol lipids	329.138	0.0879651	0	40.6	4.65716	-	Terpene lactones	2.106	1.69	1.971	2.157	2.114	2.312	2.168	2.408	2.337	1.612	2.382	1.853	2.153	1.986	1.941	2.489	2.194	2.364	2.254	2.181	2.203
neg_512	Aquifoliunine EII	阿奎福林	metab_4803	B(ii)	-	-	HMDB0032859	M+K-2H	C34H43NO16	4.5697	-	-	neg	-	-	-	-	Benzenoids	Naphthalenes	758.2	0.10279	0	56.4	-9.46259	-	Not Available	3.234	3.217	3.15	3.493	3.167	3.211	3.502	3.335	3.017	3.075	2.881	3.184	3.178	3.226	3.09	3.005	3.198	3.326	3.255	3.188	3.173
neg_513	Haloperidol glucuronide	氟哌啶醇葡萄糖醛酸苷	metab_4804	B(ii)	-	-	HMDB0060904	M+Na-2H	C27H31ClFNO8	4.5808	-	-	neg	-	-	-	-	Organic oxygen compounds	Organooxygen compounds	572.144	0.159318	0	34.1	-5.50632	-	Carbohydrates and carbohydrate conjugates	2.123	0.7618	1.472	1.4	1.433	1.841	2.263	1.566	2.099	1.881	1.646	1.886	0.7193	0.7723	1.326	1.886	1.651	1.748	1.851	1.791	1.713
neg_514	Pyroglutamyl-histidyl-glycine	-	metab_4805	B(ii)	-	-	HMDB0256990	2M+FA-H	C13H17N5O5	4.6031	-	-	neg	-	-	-	-	Organic acids and derivatives	Carboxylic acids and derivatives	691.246	0.129086	0	34.6	2.35138	-	Amino acids, peptides, and analogues	2.363	2.554	0.9924	2.252	1.689	2.065	1.159	0.4973	2.182	1.868	2.134	0.482	1.553	2.262	1.781	2	1.843	0.9624	2.073	2.007	1.964
neg_527	Citrusin A	橙皮素A	metab_4819	B(ii)	-	-	HMDB0039230	M-H2O-H	C26H34O12	4.7368	-	-	neg	-	-	-	-	Lignans, neolignans and related compounds	Lignan glycosides	519.186	0.0386137	0	39.7	-1.74481	105279-09-2	Not Available	2.293	2.583	2.262	2.126	2.279	2.324	2.185	2.437	2.367	1.779	2.501	2.15	1.991	2.042	2.153	2.369	2.351	2.306	2.379	2.346	2.358
neg_534	Laricitrin 3-glucoside	西伯利亚落叶松黄酮3 -葡萄糖苷	metab_4827	B(i)	-	-	LMPK12112471	M-H	C22H22O13	4.7923	-	-	neg	-	-	-	-	-	-	493.099	0.0928279	33.7	0	0.809502	-	-	1.927	1.34	3.099	1.393	1.357	1.405	1.423	3.076	3.329	2.093	1.693	3.001	1.29	1.352	1.383	1.429	1.392	3.079	2.466	2.414	2.388
neg_540	N2-(2-Carboxymethyl-2-hydroxysuccinoyl)arginine	N2-（2-羧甲基-2-羟基琥珀酰基）精氨酸	metab_4834	B(ii)	-	-	HMDB0032766	M-H2O-H	C12H20N4O8	4.8594	-	-	neg	-	-	-	-	Organic acids and derivatives	Carboxylic acids and derivatives	329.107	0.0503072	0	49.8	-8.94524	87605-91-2	Amino acids, peptides, and analogues	2.482	2.136	2.447	2.276	2.191	2.53	2.579	2.521	2.63	2.445	2.548	2.604	2.334	2.52	2.402	2.518	2.534	2.499	2.526	2.532	2.491
neg_545	N-[(5-Hydroxy-2-pyridinyl)methyl]adenosine	N-[（5-羟基-2-吡啶基）甲基]腺苷	metab_4838	B(ii)	-	-	HMDB0040912	M-H	C16H18N6O5	4.904	-	-	neg	-	-	-	-	Nucleosides, nucleotides, and analogues	Purine nucleosides	373.126	0.0863783	0	37.6	-0.482667	123369-41-5	Not Available	1.888	1.427	1.908	1.748	1.792	1.955	1.986	2.29	2.179	2.026	1.999	1.975	1.637	1.707	1.75	2.116	1.883	1.977	2.029	1.954	1.997
neg_547	Ethyl apovincaminate	长春西汀	metab_4840	B(ii)	-	-	HMDB0243512	M+K-2H	C22H26N2O2	4.9263	-	-	neg	-	-	-	-	Alkaloids and derivatives	Eburnan-type alkaloids	387.148	0.0226608	0	31.2	-0.293966	-	Not Available	3.314	3.347	2.753	2.96	3.05	3.016	2.897	2.757	3.033	2.668	3.035	2.722	2.582	3.017	2.94	2.998	2.953	2.955	3.079	3.081	3.063
neg_55	Gingerglycolipid B	姜糖脂B	metab_4843	B(ii)	-	-	HMDB0041094	M+Cl, M+FA-H, M-H	C33H58O14	8.6636	-	-	neg	-	-	-	-	Lipids and lipid-like molecules	Glycerolipids	723.383	0.0797423	0	35.3	3.78786	88168-90-5	Glycosylglycerols	3.809	4.514	3.716	3.454	3.816	3.679	3.55	3.905	3.62	4.178	3.344	3.891	3.361	3.138	3.654	3.406	3.674	3.593	3.967	3.922	3.9
neg_556	4-Methyl-umbelliferyl-N-acetyl-chitobiose	4 -甲基伞形酮基- N -乙酰壳二糖	metab_4850	B(ii)	-	-	HMDB0246931	M+Na-2H	C26H34N2O13	5.0045	-	-	neg	-	-	-	-	Phenylpropanoids and polyketides	Coumarins and derivatives	603.178	0.0765949	0	35.9	-4.6516	-	Coumarin glycosides	2.919	3.095	2.359	2.443	2.768	2.775	2.82	2.533	2.912	2.509	2.699	2.451	2.367	2.749	2.923	2.731	2.838	2.492	2.852	2.809	2.788
neg_558	Tryptophylhydroxyproline	色氨酸羟脯氨酸	metab_4852	B(ii)	-	-	HMDB0029084	M+Na-2H	C16H19N3O4	5.0156	-	-	neg	-	-	-	-	Organic acids and derivatives	Carboxylic acids and derivatives	338.111	0.0598782	0	48.7	-3.14651	844640-75-1	Amino acids, peptides, and analogues	1.8	2.181	1.431	1.296	1.625	1.842	1.829	1.603	1.965	1.651	1.635	1.425	0.9033	1.825	2.056	1.85	2.076	1.557	1.882	1.854	1.905
neg_566	Multiflorin A	蔷薇甙	metab_4861	B(ii)	-	-	LMPK12111899;HMDB0303598	M-H2O-H	C29H32O16	5.1049	-	-	neg	-	-	-	-	Phenylpropanoids and polyketides	Flavonoids	617.151	0.079759	0	33.5	-0.493612	-	Flavonoid glycosides	1.712	0.6971	1.223	1.314	1.412	1.771	1.782	1.778	1.923	1.508	1.783	1.559	0.6561	1.427	1.644	1.919	1.718	1.656	1.71	1.68	1.642
neg_575	3-Hydroxypropyl methacrylate	3 -甲基丙烯酸羟丙酯	metab_4871	B(ii)	-	-	HMDB0245905	M+FA-H	C7H12O3	5.2503	-	-	neg	-	-	-	-	Organic acids and derivatives	Carboxylic acids and derivatives	189.077	0.110258	0	52.4	3.09973	-	Carboxylic acid derivatives	2.489	2.479	0.864	1.92	2.313	2.594	2.216	1.541	2.616	1.909	2.587	0.9955	1.417	2.221	2.435	2.677	2.3	1.938	2.379	2.309	2.291
neg_579	Chidamide	奇达米德	metab_4875	B(ii)	-	-	HMDB0250075	M-H2O-H	C22H19FN4O2	5.2726	-	-	neg	-	-	-	-	Benzenoids	Benzene and substituted derivatives	371.128	0.0683026	0	42.3	-8.30011	-	Anilides	2.241	1.943	2.126	2.073	1.941	2.173	2.094	2.46	2.624	2.291	2.271	2.385	0.9908	1.805	1.83	2.158	2.124	2.335	2.26	2.202	2.24
pos_1439	Benzyl gentiobioside	苄基龙胆二糖苷	metab_489	B(ii)	-	-	HMDB0041515	M+H-2H2O	C19H28O11	5.9279	-	-	pos	-	-	-	-	Organic oxygen compounds	Organooxygen compounds	397.151	0.135064	0	49.7	4.19536	56775-64-5	Carbohydrates and carbohydrate conjugates	2.387	3.333	1.718	2.165	1.979	1.973	1.723	1.892	2.395	2.354	2.252	1.919	1.47	2.171	2.084	2.292	2.311	2.026	2.43	2.53	2.542
neg_593	Methionyl-Asparagine	甲硫氨酰基-天冬酰胺	metab_4891	B(ii)	-	-	HMDB0028968	2M-H	C9H17N3O4S	5.3849	-	-	neg	-	-	-	-	Organic acids and derivatives	Carboxylic acids and derivatives	525.18	0.0186056	0	50.8	-0.727354	-	Amino acids, peptides, and analogues	3.037	3.055	2.55	3.076	2.652	2.89	2.618	2.672	2.978	2.731	2.95	2.685	2.5	2.786	2.727	2.943	2.823	2.627	2.873	2.857	2.864
neg_594	Aquifoliunine EIII	阿奎福林	metab_4892	B(ii)	-	-	HMDB0033578	M+K-2H	C36H45NO17	5.3849	-	-	neg	-	-	-	-	Alkaloids and derivatives	Not Available	800.211	0.120834	0	43.5	-8.82592	220751-20-2	Not Available	2.392	0.4574	2.078	1.489	0.4691	1.77	2.924	2.764	2.394	2.265	0.483	2.461	0.4243	0.4657	0.4872	0.5203	0.494	2.988	2.297	2.203	2.217
neg_600	Cadazolid	咔哒唑胺	metab_4900	B(ii)	-	-	HMDB0249528	M+Na-2H	C29H29F2N3O8	5.4969	-	-	neg	-	-	-	-	Organoheterocyclic compounds	Quinolines and derivatives	606.168	0.10554	0	35.5	1.36742	-	Quinoline carboxylic acids	2.163	1.173	1.258	1.225	1.302	1.793	2.035	1.254	1.916	1.706	1.832	1.233	1.125	1.444	1.67	2.137	1.287	1.297	1.731	1.641	1.696
neg_605	Azetirelin	阿泽特林	metab_4905	B(ii)	-	-	HMDB0248799	M-H2O-H	C15H20N6O4	5.5304	-	-	neg	-	-	-	-	Organic acids and derivatives	Carboxylic acids and derivatives	329.138	0.212107	0	44.7	2.38016	-	Amino acids, peptides, and analogues	1.346	2.239	0.8926	1.805	0.5204	1.804	1.069	1.328	1.374	0.6705	1.139	0.9191	0.3207	0.7899	0.3739	1.144	1.81	1.61	1.37	1.544	1.526
neg_614	Tricin 7-[rhamnosyl-(1->2)-galacturonide]	Tricin 7-[鼠李糖基-（1->2）-半乳糖醛酸]	metab_4915	B(ii)	-	-	HMDB0037461	M+Na-2H	C29H32O17	5.5866	-	-	neg	-	-	-	-	Phenylpropanoids and polyketides	Flavonoids	673.145	0.111341	0	38.5	9.93481	89915-54-8	Flavonoid glycosides	2.108	2.229	1.245	2.389	2.5	2.55	1.961	1.759	2.576	2.014	2.595	1.278	1.924	2.313	2.124	2.626	2.196	1.446	2.301	2.227	2.214
neg_635	Cediranib	西地尼布	metab_4937	B(ii)	-	-	HMDB0249749	M-H2O-H	C25H27FN4O3	5.7326	-	-	neg	-	-	-	-	Organic oxygen compounds	Organooxygen compounds	431.193	0.00477189	0	34.8	8.13817	-	Ethers	3.666	3.925	2.827	3.073	3.176	3.527	2.889	1.235	2.452	2.479	2.659	2.625	2.711	3.259	3.283	2.856	2.96	2.723	3.303	3.3	3.303
neg_636	5,6,7,4'-Tetrahydroxyflavanone 6,7-diglucoside	5，6，7，4 ' -四羟基二氢黄酮- 6，7 -二葡萄糖苷	metab_4938	B(ii)	-	-	HMDB0301984;LMPK12140616	M+FA-H	C27H32O16	5.7326	-	-	neg	-	-	-	-	Phenylpropanoids and polyketides	Flavonoids	657.168	0.0144193	0	38.4	0.495007	-	Flavonoid glycosides	3.349	3.492	3.298	3.426	3.298	3.433	3.245	3.457	3.51	3.165	3.279	3.022	3.022	3.169	3.105	3.435	3.287	3.024	3.349	3.336	3.343
neg_639	(-)-Huperzine A (HupA)	（-）-石杉碱甲（HupA）	metab_4941	B(ii)	-	-	HMDB0242212	M+K-2H	C15H18N2O	5.7549	-	-	neg	-	-	-	-	Organoheterocyclic compounds	Quinolines and derivatives	279.091	0.171653	0	52.2	3.57336	-	Quinolones and derivatives	2.692	0.9281	2.877	0.2887	0.6767	0.2947	2.754	2.586	2.48	1.837	1.507	2.865	0.8488	0.5643	0.6102	0.5361	0.2884	2.725	2.282	2.213	2.132
neg_644	3,4-Dihydroxyphenylglycol O-sulfate	3，4 -二羟基苯乙二醇O -硫酸盐	metab_4947	B(ii)	-	-	HMDB0001474	M+Na-2H	C8H10O7S	5.7774	-	-	neg	-	-	-	-	Organic acids and derivatives	Organic sulfuric acids and derivatives	270.991	0.103868	0	34.6	7.45795	3415-68-7	Arylsulfates	2.417	2.206	1.64	2.321	2.531	2.604	2.616	1.986	2.248	2.427	2.386	1.565	2.186	2.082	2.402	2.509	2.499	2.411	2.361	2.451	2.415
neg_645	Diflomotecan	地氟莫通	metab_4948	B(ii)	-	-	HMDB0251257	M-H	C21H16F2N2O4	5.7774	-	-	neg	-	-	-	-	Organoheterocyclic compounds	Quinolines and derivatives	397.097	0.117811	0	32	-8.77129	-	Haloquinolines	1.337	2.241	2.072	0.6705	0.9794	0.6935	1.542	1.487	2.149	1.708	1.318	1.177	0.3747	0.7154	0.06489	1.87	1.459	0.06274	1.697	1.729	1.629
neg_647	Ethyl 4-ethoxybenzoate	4 -乙氧基苯甲酸乙酯	metab_4949	B(ii)	-	-	HMDB0059898	M-H	C11H14O3	5.8112	-	-	neg	-	-	-	-	Benzenoids	Benzene and substituted derivatives	193.088	0.0670478	0	38.1	3.14144	-	Benzoic acids and derivatives	2.731	2.265	2.554	2.516	2.363	2.614	3.068	2.695	2.612	2.764	2.501	2.661	2.441	2.631	2.634	2.597	2.69	2.902	2.726	2.668	2.705
neg_656	Nepetaside	假荆芥内酯苷	metab_4959	B(ii)	-	-	HMDB0038149	M+Na-2H	C16H26O8	5.9012	-	-	neg	-	-	-	-	Lipids and lipid-like molecules	Prenol lipids	367.139	0.0449334	0	30.8	3.73324	114076-56-1	Terpene glycosides	2.278	1.85	2.134	1.7	1.639	1.932	2.426	2.485	2.565	2.673	1.96	2.369	1.665	1.922	2.132	2.255	1.939	2.319	2.214	2.228	2.252
neg_670	Saroglitazar	萨罗格利塔扎	metab_4975	B(ii)	-	-	HMDB0257500	2M+Hac-H	C25H29NO4S	6.0582	-	-	neg	-	-	-	-	Organoheterocyclic compounds	Pyrroles	937.374	0.178971	0	33.3	-3.59779	-	Substituted pyrroles	2.737	3.143	1.151	2.502	2.28	2.469	1.78	0.5126	1.796	2.063	1.887	1.309	1.75	2.72	2.453	1.824	2.158	0.4739	2.491	2.514	2.362
neg_671	Dukunolide C	杜库诺列德C	metab_4976	B(ii)	-	-	HMDB0035204	M-H2O-H	C28H28O11	6.0694	-	-	neg	-	-	-	-	Organoheterocyclic compounds	Naphthopyrans	521.145	0.136161	0	49.2	-0.14683	99343-74-5	Not Available	1.177	1.065	1.392	1.583	1.57	1.433	1.335	2.01	1.583	2.005	1.467	1.949	1.056	1.076	1.407	1.657	1.9	1.772	1.635	1.629	1.528
neg_672	19-Hydroxydeacetylnomilinic acid 17-beta-D-glucopyranoside	19-羟基脱乙酰壬二酸17-β-D-吡喃葡萄糖苷	metab_4977	B(ii)	-	-	HMDB0037589	M+FA-H	C32H46O16	6.0917	-	-	neg	-	-	-	-	Lipids and lipid-like molecules	Saccharolipids	731.277	0.0880351	0	45.5	0.496745	-	Not Available	2.963	3.044	2.674	3.184	2.5	3.185	2.838	2.912	2.425	2.08	2.123	2.126	2.921	1.984	2.138	2.784	2.851	2.871	2.866	2.812	2.793
neg_681	(5R)-5-[(1S)-1,2-Dihydroxyethyl]-3-[(2R,3R,4S,5S,6R)-3,4,5-trihydroxy-6-(hydroxymethyl)oxan-2-yl]oxyoxolane-2,4-dione	（5R）-5-[（1S）-1,2-二羟乙基]-3-[（2R，3R，4S，5S，6R）-3,4,5-三羟基-6-（羟甲基）氧代-2-基]氧代戊烷-2,4-二酮	metab_4987	B(ii)	-	-	HMDB0260164	2M+FA-H	C12H18O11	6.225	-	-	neg	-	-	-	-	Lipids and lipid-like molecules	Fatty Acyls	721.163	0.0637183	0	35.3	-7.42846	-	Fatty acyl glycosides	2.827	2.992	2.783	3.101	3.06	3.101	2.67	2.882	2.933	2.923	2.983	2.49	2.864	2.989	2.946	2.88	2.945	2.502	2.968	2.927	2.916
neg_702	(+/-)-Methyl 5-acetoxyhexanoate	（+/-）-5-乙酰氧基己酸甲酯	metab_5011	B(ii)	-	-	HMDB0032387	M+Na-2H	C9H16O4	6.4919	-	-	neg	-	-	-	-	Lipids and lipid-like molecules	Fatty Acyls	209.08	0.0409643	0	31	0.636619	35234-22-1	Fatty acid esters	1.307	0.4391	0.4576	1.508	1.53	1.439	0.9645	0.496	1.173	0.6679	1.189	0.4807	1.543	1.496	1.493	1.468	1.515	0.8498	1.337	1.303	1.321
neg_721	Nomilinic acid 17-O-beta-D-glucoside	诺米林酸17-O-β-D-葡萄糖苷	metab_5032	B(ii)	-	-	HMDB0302541	M+FA-H	C34H48O16	6.7372	-	-	neg	-	-	-	-	Lipids and lipid-like molecules	Saccharolipids	757.293	0.237573	0	34.2	0.79876	-	Not Available	2.375	3.014	0.5707	1.347	1.38	2.375	1.278	0.5798	0.6117	0.5635	0.5452	0.5632	0.4824	0.6704	0.6556	0.5848	0.9205	0.5385	1.907	1.885	1.705
neg_726	Xi-Tetrahydro-6-propyl-2H-pyran-2-one	-	metab_5037	B(ii)	-	-	HMDB0038310	2M+Hac-H	C8H14O2	6.8042	-	-	neg	-	-	-	-	Organoheterocyclic compounds	Lactones	343.214	0.0831406	0	37.1	5.33252	-	Delta valerolactones	2.529	2.358	2.581	2.579	2.599	2.477	2.667	2.588	2.617	2.67	2.603	2.644	2.65	2.737	2.668	2.66	2.78	2.533	2.617	2.551	2.561
neg_733	DG(2:0/0:0/20:5(5Z,8Z,11Z,14Z,16E)-OH(18))	-	metab_5045	B(ii)	-	-	HMDB0296981	M+FA-H	C25H38O6	6.8822	-	-	neg	-	-	-	-	Not Available	Not Available	479.265	0.219928	0	30.2	0.311046	-	Not Available	2.619	2.924	2.784	2.047	2.601	2.681	2.39	1.029	1.88	1.009	2.115	1.345	2.236	2.785	2.842	1.841	2.421	0.9773	2.536	2.38	2.379
neg_735	Isoglycycoumarin	异甘草香豆素	metab_5047	B(ii)	-	-	HMDB0038873;LMPK12160020	2M-H	C21H20O6	6.8933	-	-	neg	-	-	-	-	Phenylpropanoids and polyketides	Isoflavonoids	735.25	0.223884	0	32.1	7.08132	117038-82-1	Hydroxyisoflavonoids	1.685	1.841	1.488	2.325	1.373	2.153	1.075	1.768	1.379	0.2584	1.337	0.2582	1.904	0.2361	1.003	1.747	1.733	1.366	1.743	1.591	1.582
pos_1453	Prehumulinic acid	预腐植酸	metab_505	B(ii)	-	-	HMDB0030148	M+ACN+H	C16H24O4	5.9875	-	-	pos	-	-	-	-	Organic acids and derivatives	Vinylogous acids	322.202	0.044441	0	46.5	3.10391	-	Not Available	1.813	0.6214	0.8545	1.344	1.942	0.5627	1.577	0.4144	1.98	1.315	2.194	1.38	1.982	1.892	1.56	1.796	1.13	0.4411	1.668	1.64	1.677
neg_738	2,3-dinor Prostaglandin E1	2,3-dinor 前列腺素E1	metab_5050	B(i)	-	-	-	M-H	C18H30O5	6.9873	-	-	neg	-	-	-	-	-	-	325.202	0.0464348	43	0	-1.46491	-	-	2.985	3.159	2.803	3.021	2.884	2.918	3.064	2.749	2.868	3.009	2.947	2.926	3.05	3.483	3.525	3.152	3.384	2.755	3.107	3.146	3.138
neg_745	3-(2,4-Dimethyl-5-(2-oxo-1,2-dihydroindol-3-ylidenemethyl)-1H-pyrrol-3-yl)propionic acid	3-（2,4-二甲基-5-（2-氧代-1,2-二氢吲哚-3-亚基甲基）-1H-吡咯-3-基）丙酸	metab_5058	B(ii)	-	-	HMDB0258528	2M-H	C18H18N2O3	7.2	-	-	neg	-	-	-	-	Organoheterocyclic compounds	Indoles and derivatives	619.262	0.136747	0	45.3	9.71987	-	Indolines	2.333	2.596	0.3265	0.341	0.8897	1.69	0.9583	0.3579	0.3824	0.3456	0.3319	0.3454	0.2858	1.639	1.545	0.3618	0.3406	0.3268	1.612	1.543	1.499
neg_746	N2-Galacturonyl-L-lysine	N2-半乳糖酰-L-赖氨酸	metab_5059	B(ii)	-	-	HMDB0033105	2M-H	C12H22N2O8	7.2333	-	-	neg	-	-	-	-	Organic oxygen compounds	Organooxygen compounds	643.262	0.022503	0	52.7	-8.62229	220718-56-9	Carbohydrates and carbohydrate conjugates	3.02	3.097	2.875	3.445	3.261	3.27	2.878	3.045	3.324	2.671	3.376	2.436	3.121	3.173	3.04	3.168	2.88	2.934	3.15	3.142	3.161
neg_747	Rotigaptide	罗替加肽	metab_5060	B(ii)	-	-	HMDB0257314	M+FA-H	C28H39N7O9	7.2443	-	-	neg	-	-	-	-	Organic acids and derivatives	Carboxylic acids and derivatives	662.275	0.0606961	0	71.8	-5.94368	-	Amino acids, peptides, and analogues	1.348	1.662	1.449	1.578	0.784	1.579	0.6376	1.598	1.692	0.7297	1.66	0.6689	0.4029	1.302	1.116	1.266	1.146	1.165	1.365	1.349	1.315
neg_748	Cyclo(D-trp-D-asp-pro-D-val-leu)	环（D-trp-D-asp-pro-D-val-leu）	metab_5061	B(ii)	-	-	HMDB0249361	M+Cl	C31H42N6O7	7.2665	-	-	neg	-	-	-	-	Organic acids and derivatives	Carboxylic acids and derivatives	645.277	0.0755815	0	65.7	-6.72107	-	Amino acids, peptides, and analogues	3.113	3.079	2.958	3.142	2.853	3.117	2.87	2.697	3.154	3.194	3.111	2.621	2.918	3.059	2.934	2.996	2.965	2.726	3.065	3.076	3.013
neg_760	5,7-Megastigmadien-9-ol glucoside	5,7-巨豆二烯-9-醇葡萄糖苷	metab_5075	B(ii)	-	-	HMDB0041044	M+Na-2H	C19H32O6	7.7335	-	-	neg	-	-	-	-	Lipids and lipid-like molecules	Fatty Acyls	377.195	0.271417	0	37.9	1.57651	146610-77-7	Fatty acyl glycosides	1.623	1.33	2.222	2.221	2.308	2.111	2.099	2.285	1.813	2.2	1.837	2.08	2.425	1.745	2.061	2.059	2.269	1.891	2.132	1.915	2.146
neg_765	Glyuranolide	甘乌内酯	metab_5080	B(ii)	-	-	HMDB0038745	M+Cl	C31H44O6	7.9009	-	-	neg	-	-	-	-	Lipids and lipid-like molecules	Prenol lipids	547.281	0.221482	0	33.6	-4.0024	123914-44-3	Triterpenoids	2.064	1.474	2.737	2.522	2.111	2.38	2.636	2.69	1.529	2.606	1.177	2.611	2.541	1.851	2.281	1.845	2.143	2.592	2.447	2.287	2.292
neg_776	LysoPE(0:0/16:1(9Z))	-	metab_5092	B(ii)	-	-	HMDB0011474	M-H	C21H42NO7P	8.6306	-	-	neg	-	-	-	-	Lipids and lipid-like molecules	Glycerophospholipids	450.263	0.029609	0	32.5	0.300646	-	Glycerophosphoethanolamines	2.645	2.93	2.137	2.408	2.381	2.378	2.261	1.586	2.863	2.736	2.828	1.762	0.918	2.487	2.527	2.434	2.759	1.508	2.72	2.701	2.695
neg_782	LysoPE(18:2(9Z,12Z)/0:0)	-	metab_5099	B(ii)	-	-	HMDB0011507	M-H	C23H44NO7P	8.7674	-	-	neg	-	-	-	-	Lipids and lipid-like molecules	Glycerophospholipids	476.279	0.0933976	0	38.4	0.61011	85046-18-0	Glycerophosphoethanolamines	3.796	3.895	3.851	3.65	3.661	3.652	3.75	3.738	3.806	3.831	3.847	3.845	3.567	3.829	3.711	3.788	3.784	3.783	3.802	3.724	3.747
neg_783	LysoPS(18:1(9Z)/0:0)	-	metab_5100	B(ii)	-	-	HMDB0240603	M+Na-2H	C24H46NO9P	8.8407	-	-	neg	-	-	-	-	Lipids and lipid-like molecules	Glycerophospholipids	544.267	0.199814	0	56.2	2.3641	89319-60-8	Glycerophosphoserines	2.826	2.793	2.997	2.784	2.572	2.645	2.874	2.873	2.662	2.858	2.785	2.891	2.436	2.8	2.724	2.694	2.751	2.866	2.925	2.76	2.812
neg_790	Gingerglycolipid C	姜糖脂C	metab_5108	B(ii)	-	-	HMDB0041095;LMGL04010018	M+FA-H	C33H60O14	8.9797	-	-	neg	-	-	-	-	Lipids and lipid-like molecules	Glycerolipids	725.395	0.271628	0	50.7	-1.57877	35949-86-1	Glycosylglycerols	1.954	2.768	1.139	0.6026	1.747	1.777	1.055	1.816	1.819	2.448	0.9862	1.666	0.7958	0.3308	1.326	0.6526	1.639	0.647	1.973	1.904	1.731
neg_799	2,3-Dinor-TXB1	-	metab_5117	B(ii)	-	-	LMFA03030012;HMDB0245413	M+Na-2H	C19H34O5	9.2437	-	-	neg	-	-	-	-	Lipids and lipid-like molecules	Fatty Acyls	363.216	0.0627364	0	70	3.37028	-	Fatty acids and conjugates	2.817	2.845	2.838	2.965	2.96	2.959	3.124	2.881	2.935	3.06	3.033	3.09	3.037	2.988	3.169	2.981	3.139	2.796	2.987	3.03	3.039
neg_800	Isoforskolin	异佛司可林	metab_5120	B(ii)	-	-	HMDB0253641	M+Na-2H	C22H34O7	9.2437	-	-	neg	-	-	-	-	Lipids and lipid-like molecules	Prenol lipids	431.203	0.220314	0	34.8	-5.15581	-	Triterpenoids	1.574	1.596	1.559	1.585	1.536	1.474	2.179	0.6676	1.541	1.629	1.808	1.018	1.148	1.986	2.041	1.741	2.03	0.6234	2.097	1.966	1.921
neg_805	14-Hydroperoxy-H4-neuroprostane	14-氢过氧基-H4-神经前列烷	metab_5125	B(ii)	-	-	HMDB0062292	M+Na-2H	C22H32O6	9.3805	-	-	neg	-	-	-	-	Lipids and lipid-like molecules	Fatty Acyls	413.193	0.116837	0	49.9	-4.65595	-	Eicosanoids	2.208	2.106	1.902	2.323	2.225	2.269	2.118	1.917	2.248	2.293	2.246	1.392	1.883	2.353	2.51	2.096	2.292	1.327	2.332	2.403	2.309
pos_1460	4-(4-benzyl-2,3-dioxopiperazin-1-yl)-N-(3-chlorophenyl)piperidine-1-carboxamide	4-（4-苄基-2,3-二氧杂哌嗪-1-基）-N-（3-氯苯基）哌啶-1-甲酰胺	metab_513	B(i)	-	-	-	M+H	C23H25ClN4O3	6.0112	-	-	pos	-	-	-	-	-	-	441.173	0.0582384	37.8	0	9.85168	-	-	3.619	2.246	3.736	3.236	2.96	3.295	3.771	3.517	3.448	3.318	3.232	3.715	3.502	3.187	3.217	3.327	3.638	3.406	3.431	3.47	3.478
neg_816	PA(20:3(8Z,11Z,14Z)-2OH(5,6)/22:1(13Z))	-	metab_5137	B(ii)	-	-	HMDB0265697	M+Na-2H	C45H81O10P	9.5965	-	-	neg	-	-	-	-	Not Available	Not Available	833.527	0.136359	0	97.5	-5.03141	-	Not Available	3.23	3.107	3.48	3.456	3.387	3.353	3.386	3.496	3.146	3.42	3.226	3.653	3.655	3.471	3.503	3.388	3.501	3.575	3.356	3.378	3.465
neg_817	Donhexocin	多奈可辛	metab_5138	B(ii)	-	-	HMDB0033087	M+Cl	C35H66O8	9.6075	-	-	neg	-	-	-	-	Lipids and lipid-like molecules	Fatty Acyls	649.449	0.123616	0	50.9	5.61574	-	Fatty alcohols	1.976	1.937	2.031	2.361	2.226	2.344	2.418	2.179	2	2.185	2.276	2.145	2.311	2.192	2.533	2.471	2.3	1.866	2.354	2.251	2.284
neg_842	Methylenediphosphonic acid	甲撑二膦酸	metab_5165	B(ii)	-	-	HMDB0254641	M+K-2H	CH6O6P2	11.2884	-	-	neg	-	-	-	-	Organic acids and derivatives	Organic phosphonic acids and derivatives	212.911	0.168213	0	39.6	-8.64984	-	Bisphosphonates	1.118	0.8204	1.047	1.13	1.028	0.9375	0.9822	1.275	0.9986	1.19	0.9083	1.167	1.293	0.9552	0.9695	1.107	1.072	1.006	1.053	1.058	1.168
neg_844	2-Angeloyl-9-(3-methyl-2E-pentenoyl)-2b,9a-dihydroxy-4Z,10(14)-oplopadien-3-one	2-天使酰基-9-（3-甲基-2E-戊烯酰基）-2b，9a-二羟基-4Z，10（14）-丙二烯-3-酮	metab_5167	B(ii)	-	-	HMDB0034064	2M+FA-H	C26H36O5	11.2884	-	-	neg	-	-	-	-	Lipids and lipid-like molecules	Prenol lipids	901.507	0.140871	0	34.3	-4.37964	237407-02-2	Sesquiterpenoids	1.501	1.135	1.644	1.743	1.348	1.152	1.904	1.528	1.62	1.689	1.742	1.936	2.138	1.697	1.722	1.616	1.733	1.858	1.674	1.675	1.775
neg_862	Alpha-D-Galactopyranuronosyl-(1->4)-alpha-D-galactopyranuronosyl-(1->4)-D-galacturonic acid	-	metab_5187	B(ii)	-	-	HMDB0039751	M-H2O-H	C18H26O19	11.2994	-	-	neg	-	-	-	-	Organic oxygen compounds	Organooxygen compounds	527.088	0.220958	0	35.1	-2.59289	6037-45-2	Carbohydrates and carbohydrate conjugates	2.51	2.523	1.972	2.276	2.629	2.226	1.852	0.7067	2.646	2.049	2.803	2.02	2.551	2.697	2.505	2.49	2.48	1.349	2.563	2.388	2.426
neg_895	3,3',4,4'-Tetrachloroazoxybenzene	3，3 '，4，4 ' -四氯氧化偶氮苯	metab_5223	B(ii)	-	-	HMDB0246008	M+FA-H	C12H6Cl4N2O	11.2547	-	-	neg	-	-	-	-	Benzenoids	Benzene and substituted derivatives	378.919	0.0943285	0	45.8	-8.8268	-	Halobenzenes	1.779	1.62	1.958	1.82	1.873	1.691	1.811	1.854	1.693	1.931	1.581	2.024	1.915	1.817	1.765	1.844	1.848	1.914	1.85	1.781	1.783
neg_919	N-Myristoyl Aspartic acid	N -肉豆蔻酰天冬氨酸	metab_5250	B(ii)	-	-	HMDB0242048	M+Na-2H	C18H33NO5	9.6075	-	-	neg	-	-	-	-	Organic acids and derivatives	Carboxylic acids and derivatives	364.211	0.215708	0	42.7	0.985656	-	Amino acids, peptides, and analogues	2.259	2.302	2.49	2.625	2.448	2.721	2.416	2.654	2.172	2.648	2.343	2.878	2.871	2.568	2.637	2.574	2.483	2.511	2.511	2.544	2.68
neg_951	4-Hprog	-	metab_5285	B(ii)	-	-	HMDB0246436	M+Na-2H	C32H41NO8	9.1009	-	-	neg	-	-	-	-	Lipids and lipid-like molecules	Prenol lipids	588.255	0.122133	0	36.8	-5.28203	-	Retinoids	1.816	1.278	1.324	0.589	0.5612	0.5982	1.742	1.019	2.235	0.5953	2.126	1.26	0.5117	1.686	1.76	1.654	1.61	0.7494	1.828	1.895	1.933
neg_952	LysoPE(16:0/0:0)	-	metab_5286	B(ii)	-	-	PW_C007100;HMDB0011503	M-H	C21H44NO7P	9.0899	-	-	neg	-	-	-	-	Lipids and lipid-like molecules	Glycerophospholipids	452.279	0.089444	0	40.7	1.2894	53862-35-4	Glycerophosphoethanolamines	3.551	3.355	3.431	3.159	3.173	3.251	3.571	3.446	3.795	3.365	3.713	3.666	3.389	3.653	3.643	3.549	3.545	3.538	3.531	3.609	3.572
neg_967	(9S,10E,12Z,15Z)-9-Hydroxyoctadeca-10,12,15-Trienoic Acid	（9S，10E，12Z，15Z）-9-羟基十八碳-10,12,15-三油酸	metab_5302	B(i)	-	-	-	M-H	C18H30O3	8.6636	-	-	neg	-	-	-	-	-	-	293.213	0.0301317	32.3	0	2.63524	-	-	3.336	3.332	3.25	3.426	3.424	3.403	3.433	3.34	3.304	3.27	3.287	3.287	3.308	3.443	3.425	3.281	3.639	3.271	3.392	3.369	3.37
neg_968	N-Docosahexaenoyl Tryptophan	N -二十二碳六烯酰色氨酸	metab_5303	B(ii)	-	-	HMDB0242023	M+FA-H	C33H42N2O3	8.6416	-	-	neg	-	-	-	-	Not Available	Not Available	559.314	0.08356	0	39.6	-8.16906	-	Not Available	3.431	3.808	3.592	3.636	3.756	3.579	3.536	3.719	3.27	3.754	3.224	3.633	3.545	3.304	3.57	3.496	3.762	3.444	3.622	3.587	3.549
neg_970	13-Hydroxy-9-methoxy-10-oxo-11-octadecenoic acid	13 -羟基- 9 -甲氧基- 10 -氧代- 11 -十八碳烯酸	metab_5305	B(ii)	-	-	HMDB0040901	M+Na-2H	C19H34O5	8.6416	-	-	neg	-	-	-	-	Lipids and lipid-like molecules	Fatty Acyls	363.216	0.0787753	0	45.9	3.07933	150147-08-3	Lineolic acids and derivatives	3.008	2.639	3.083	3.069	2.981	3.026	3.257	3.18	2.981	3.057	2.999	3.152	3.04	2.966	2.968	3.007	3.243	3.084	3.095	3.027	3.063
neg_974	Carboprost methyl	波卡前列素甲酯	metab_5309	B(ii)	-	-	HMDB0249645	M-H	C22H38O5	8.5976	-	-	neg	-	-	-	-	Lipids and lipid-like molecules	Fatty Acyls	381.266	0.0884324	0	47.2	3.33694	-	Eicosanoids	2.303	2.255	0.6908	1.891	0.6821	1.221	2.554	1.063	2.222	1.575	1.194	1.829	1.529	2.657	2.7	1.958	2.58	1.274	2.317	2.243	2.304
neg_975	PE(18:3/0:0)	-	metab_5310	B(i)	-	-	-	M-H	C23H42NO7P	8.5489	-	-	neg	-	-	-	-	-	-	474.263	0.0353589	43.4	0	0.682126	-	-	2.699	2.907	2.551	2.498	2.344	2.4	2.381	1.877	2.719	2.71	2.813	2.236	1.716	2.696	2.628	2.571	2.441	2.1	2.707	2.71	2.735
neg_992	Beta-hydroxyprednisolone	-	metab_5328	B(ii)	-	-	HMDB0249133	M-H	C21H28O6	7.8239	-	-	neg	-	-	-	-	Lipids and lipid-like molecules	Steroids and steroid derivatives	375.178	0.232748	0	32.2	-9.28929	-	Hydroxysteroids	1.112	1.678	0.8845	1.964	2.022	1.551	0.3695	0.369	1.115	1.558	1.09	0.3562	2.115	1.947	2.134	1.325	1.88	0.3372	1.626	1.505	1.436
neg_993	Corchorifatty acid D	科氏酸D	metab_5329	B(ii)	-	-	HMDB0033243	M-H	C18H28O4	7.8129	-	-	neg	-	-	-	-	Lipids and lipid-like molecules	Fatty Acyls	307.192	0.106114	0	64.4	3.2182	-	Lineolic acids and derivatives	2.73	2.852	2.826	3.094	3.026	2.879	2.534	2.421	2.578	3.019	2.547	2.549	3.045	3.003	3.263	2.959	3.218	2.383	2.971	2.888	2.899
pos_148	Gibberellin A86	赤霉素A86	metab_534	B(ii)	-	-	HMDB0038450	M+Na, M+CH3OH+H, M+H-2H2O	C19H24O8	5.6407	-	-	pos	-	-	-	-	Lipids and lipid-like molecules	Prenol lipids	403.14	0.120166	0	33.8	9.76342	138703-93-2	Diterpenoids	3.465	3.464	3.622	3.364	3.263	3.543	3.305	3.572	3.666	3.635	3.496	3.625	3.289	3.368	3.283	3.61	3.518	3.69	3.48	3.574	3.573
pos_1482	Fenoprofen glucuronide	非诺洛芬葡糖苷酸	metab_537	B(ii)	-	-	HMDB0061142	M+H-2H2O	C21H22O9	6.2507	-	-	pos	-	-	-	-	Organic oxygen compounds	Organooxygen compounds	383.116	0.0849073	0	41.4	8.55417	-	Carbohydrates and carbohydrate conjugates	2.479	1.189	2.691	2.243	2.108	2.273	2.341	2.38	2.669	2.465	2.521	2.763	2.47	2.376	2.28	2.614	2.583	2.68	2.478	2.475	2.539
pos_1484	PGP(18:3(10,12,15)-OH(9)/i-12:0)	-	metab_539	B(ii)	-	-	HMDB0274874	M+H-2H2O	C36H66O14P2	6.2507	-	-	pos	-	-	-	-	Not Available	Not Available	749.377	0.0950259	0	53.1	-2.84678	-	Not Available	2.935	3.468	1.547	2.445	2.501	2.633	1.877	1.815	1.486	0.4967	1.474	0.7394	2.129	1.639	1.386	2.041	2.035	1.952	2.307	2.335	2.253
pos_1498	Ustiloxin B	乌司他洛辛B	metab_554	B(ii)	-	-	HMDB0041373	M+ACN+Na	C26H39N5O12S	6.3932	-	-	pos	-	-	-	-	Lipids and lipid-like molecules	Prenol lipids	709.242	0.0780408	0	30.3	-8.58676	151841-41-7	Diterpenoids	2.61	2.477	2.189	2.913	2.676	2.839	2.432	2.527	2.834	2.389	2.747	2.229	2.772	2.29	2.511	2.927	2.756	2.542	2.626	2.681	2.691
pos_1518	2-Hexynyl-5'-N-ethylcarboxamidoadenosine	2 -己酰基- 5 ' - N -乙基酰胺腺苷	metab_577	B(ii)	-	-	HMDB0245138	M+CH3OH+H	C18H24N6O4	6.5593	-	-	pos	-	-	-	-	Nucleosides, nucleotides, and analogues	Purine nucleosides	421.221	0.0922518	0	37.9	4.26412	-	Not Available	2.613	3.601	2.155	2.275	2.901	2.598	2.163	1.762	2.581	2.838	2.296	2.061	2.402	2.55	2.51	2.262	2.223	1.479	2.796	2.86	2.873
pos_1531	Tetradeca-4,6-diene-8,10,12-triyne-1-ol	十四烷-4,6-二烯-8,10,12-三炔-1-醇	metab_592	B(ii)	-	-	HMDB0302337	M+H-H2O	C14H14O2	6.6668	-	-	pos	-	-	-	-	Organoheterocyclic compounds	Epoxides	197.096	0.096234	0	88.4	-0.530512	-	Not Available	2.823	3.111	2.405	2.827	3.062	2.719	2.371	2.321	3.019	2.805	3.196	2.244	2.961	3.151	3.047	3.025	2.867	2.249	2.84	2.911	2.918
pos_1535	4-Hydroxy-3-methyl-2-(2-propynyl)-2-cyclopentene-1-one	4-羟基-3-甲基-2-（2-丙炔基）-2-环戊烯-1-酮	metab_596	B(ii)	-	-	HMDB0246651	M+H-2H2O	C9H10O2	6.6903	-	-	pos	-	-	-	-	Organic oxygen compounds	Organooxygen compounds	115.054	0.107385	0	33.4	-2.10058	-	Alcohols and polyols	2.318	2.501	1.901	2.313	2.553	2.129	1.85	1.783	2.34	2.178	2.607	1.718	2.38	2.568	2.428	2.407	2.226	1.63	2.304	2.284	2.37
pos_1536	Leonoside A	益母草苷A	metab_597	B(ii)	-	-	HMDB0040342	M+H-H2O	C35H46O19	6.6903	-	-	pos	-	-	-	-	Organic oxygen compounds	Organooxygen compounds	753.256	0.0696784	0	32.3	-5.20865	140147-66-6	Carbohydrates and carbohydrate conjugates	3.276	3.174	2.784	3.136	3.047	3.06	2.856	2.896	3.436	3.079	3.412	2.96	3.038	3.152	3.137	3.298	3.117	2.946	3.123	3.177	3.176
pos_1541	Cyclic RGD	-	metab_603	B(ii)	-	-	HMDB0250625	M+H-2H2O	C24H36N8O9S	6.7375	-	-	pos	-	-	-	-	Organic acids and derivatives	Carboxylic acids and derivatives	577.217	0.10524	0	30.1	-2.40425	-	Amino acids, peptides, and analogues	2.988	3.092	2.62	2.943	2.812	2.953	2.542	2.485	3.013	2.754	2.972	2.649	3.02	2.827	2.825	3.107	2.973	2.664	2.842	2.902	2.933
pos_1543	1-(2-Furanyl)-1-butanone	1-（2-呋喃基）-1-丁酮	metab_605	B(ii)	-	-	HMDB0039802	M+H-H2O	C8H10O2	6.796	-	-	pos	-	-	-	-	Organic oxygen compounds	Organooxygen compounds	121.065	0.0766704	0	42.6	-1.10937	4208-57-5	Carbonyl compounds	1.943	1.036	1.971	1.607	1.764	1.943	1.843	2.009	2.3	1.963	2.311	2.206	1.711	1.339	1.766	2.172	2.192	2.131	2.029	2.061	2.095
pos_1593	Rutaretin 9-rutinoside	芸香亭9 -芸香糖苷	metab_660	B(ii)	-	-	HMDB0034611	M+CH3OH+H	C26H34O14	7.2513	-	-	pos	-	-	-	-	Phenylpropanoids and polyketides	Coumarins and derivatives	603.224	0.0353924	0	35.6	-8.3042	160845-05-6	Coumarin glycosides	2.757	2.302	2.409	2.499	2.447	2.416	2.551	2.618	3.173	2.768	2.924	2.769	2.194	2.181	2.53	2.743	2.736	2.524	2.718	2.687	2.702
pos_1605	Tert-butyl 4-[4-[(2-chloro-5-nitrobenzoyl)amino]phenyl]piperazine-1-carboxylate	4-[4-[（2-氯-5-硝基苯甲酰基）氨基]苯基]哌嗪-1-羧酸叔丁酯	metab_674	B(ii)	-	-	HMDB0258098	M+H-2H2O	C22H25ClN4O5	7.3905	-	-	pos	-	-	-	-	Benzenoids	Benzene and substituted derivatives	425.138	0.133028	0	47.5	0.26488	-	Anilides	3.145	3.073	3.375	3.354	3.267	3.018	3.022	2.954	2.957	3.186	3.11	3.217	3.183	3.189	3.156	3.193	3.244	3.244	3.202	3.088	3.175
pos_1607	3H-1,2,4-Triazol-3-one, 4-(4-(4-((1R,2R)-2-(2,4-difluorophenyl)-2-hydroxy-1-methyl-3-(1H-1,2,4-triazol-1-yl)propyl)-1-piperazinyl)phenyl)-2,4-dihydro-2-((4-(trifluoromethoxy)phenyl)methyl)-	3H-1,2,4-三唑-3-酮，4-（4-（（1R，2R）-2-（2,4-二氟苯基）-2-羟基-1-甲基-3-（1H-1,2,4-三唑-1-基）丙基）-1-哌嗪基）苯基）-2,4-二氢-2-（（4-（三氟甲氧基）苯基）甲基）-	metab_676	B(ii)	-	-	HMDB0260270	M+H-2H2O	C32H31F5N8O3	7.3905	-	-	pos	-	-	-	-	Organoheterocyclic compounds	Diazinanes	635.23	0.103037	0	91.5	0.42448	-	Piperazines	2.415	2.355	1.79	1.655	1.955	2.005	2.009	1.972	2.482	2.202	2.365	2.299	1.18	1.618	2.085	2.254	1.979	1.947	2.091	2.18	2.136
pos_1609	Citreoviridin C	黄绿青霉素C	metab_678	B(ii)	-	-	HMDB0030523	M+ACN+Na	C23H30O6	7.4018	-	-	pos	-	-	-	-	Organoheterocyclic compounds	Pyrans	466.221	0.21205	0	34.4	3.7072	74145-78-1	Pyranones and derivatives	0.7838	0.1117	1.541	1.987	1.989	1.638	1.264	1.386	1.672	1.24	1.967	1.512	1.45	1.827	1.621	1.859	1.7	1.545	1.484	1.647	1.656
pos_1615	1-Hydroxyepiacorone	1 -羟基淫羊藿酮	metab_685	B(ii)	-	-	HMDB0030918	M+H	C15H24O3	7.4933	-	-	pos	-	-	-	-	Organic oxygen compounds	Organooxygen compounds	253.18	0.0633048	0	53.2	-0.141735	185154-96-5	Carbonyl compounds	0.2636	0.7409	0.1946	1.806	1.732	0.9591	0.2096	0.1988	2.541	0.2517	2.224	0.2201	1.646	2.14	0.7716	0.251	0.4537	0.215	1.684	1.696	1.735
pos_1640	Asi-222	-	metab_713	B(ii)	-	-	HMDB0260432	M+H-H2O	C29H45NO7	7.8134	-	-	pos	-	-	-	-	Lipids and lipid-like molecules	Steroids and steroid derivatives	502.317	0.0536372	0	48.2	0.678356	-	Steroid lactones	2.731	2.845	3.065	3	2.947	2.969	2.941	2.899	2.712	3.003	2.85	2.964	2.933	2.875	2.88	2.956	2.932	2.979	2.892	2.938	2.908
pos_1643	(R)-Bitalin A	（R） -比塔林A	metab_716	B(ii)	-	-	HMDB0040358	M+H	C13H14O3	7.8251	-	-	pos	-	-	-	-	Benzenoids	Benzene and substituted derivatives	219.102	0.0125469	0	33.3	2.32711	35844-67-8	Acetophenones	1.473	2.473	0.2914	0.8205	2.056	1.359	1.529	1.617	1.62	0.5039	1.729	1.639	0.7612	1.54	1.767	2.622	3.737	0.3187	2.416	2.424	2.413
pos_165	(Z)-10-Hydroxy-8-decene-4,6-diynoic acid	（Z） -10-羟基-8-癸烯-4,6-二炔酸	metab_723	B(ii)	-	-	HMDB0031055	2M+H, 2M+Na, M+H	C10H10O3	5.7717	-	-	pos	-	-	-	-	Lipids and lipid-like molecules	Fatty Acyls	357.134	0.092823	0	33.4	0.985033	51193-97-6	Fatty acids and conjugates	3.601	3.431	3.728	3.504	3.441	3.737	3.601	3.762	3.795	3.801	3.655	3.71	3.495	3.521	3.625	3.792	3.672	3.779	3.641	3.692	3.721
pos_1654	2,2,7,7-Tetramethyl-1,6-dioxaspiro[4.4]nona-3,8-diene	2,2,7,7-四甲基-1,6-二氧杂螺[4.4]壬-3,8-二烯	metab_728	B(ii)	-	-	HMDB0030007	M+H	C11H16O2	7.9393	-	-	pos	-	-	-	-	Organic oxygen compounds	Organooxygen compounds	181.122	0.0760516	0	65.4	0.631073	15129-55-2	Ethers	2.618	2.223	1.944	1.567	1.137	1.679	2.169	1.547	2.681	2.201	1.736	2.564	1.958	2.089	1.946	1.175	1.898	2.321	2.237	2.211	2.171
pos_1663	(9R,10S,12Z)-9,10-Dihydroxy-8-oxo-12-octadecenoic acid	（9R，10S，12Z）-9,10-二羟基-8-氧代-12-十八碳烯酸	metab_738	B(ii)	-	-	HMDB0040611	M+NH4	C18H32O5	8.1221	-	-	pos	-	-	-	-	Lipids and lipid-like molecules	Fatty Acyls	346.259	0.103057	0	50.2	0.737942	142036-13-3	Lineolic acids and derivatives	1.616	1.774	1.231	1.893	1.636	1.791	1.966	1.595	2.024	1.247	1.739	1.775	1.887	1.966	1.942	1.648	2.173	1.692	1.878	1.805	1.803
pos_1665	(Z)-5-[(2R,3S,4S)-4-Hydroxy-2-[(E)-3-hydroxyoct-1-enyl]oxan-3-yl]pent-3-enoic acid	（Z） -5-[（2R，3S，4S）-4-羟基-2-[（E）-3-羟基辛-1-烯基]氧代-3-基]戊-3-烯酸	metab_740	B(ii)	-	-	HMDB0244345	M+Na	C18H30O5	8.1561	-	-	pos	-	-	-	-	Organic acids and derivatives	Hydroxy acids and derivatives	349.199	0.0501645	0	93.8	-0.0911625	-	Medium-chain hydroxy acids and derivatives	2.235	2.473	1.975	2.277	2.139	2.175	2.111	1.947	2.271	2.28	2.201	2.223	2.27	2.484	2.479	2.208	2.512	2.023	2.274	2.266	2.306
pos_1669	Bipindogulomethyloside	双吲哚古龙甲苷	metab_744	B(ii)	-	-	HMDB0030623	M+2Na-H	C29H44O10	8.2246	-	-	pos	-	-	-	-	Lipids and lipid-like molecules	Steroids and steroid derivatives	597.265	0.155785	0	53.1	0.545953	53152-43-5	Steroid lactones	2.418	2.632	1.694	1.509	1.772	1.174	1.973	1.456	2.269	2.101	1.932	1.434	1.541	2.38	2.331	2.354	2.327	1.405	2.036	2.042	2.151
pos_1672	MG(0:0/PGD1/0:0)	-	metab_748	B(ii)	-	-	HMDB0260562	M+H-2H2O	C23H40O7	8.2819	-	-	pos	-	-	-	-	Not Available	Not Available	393.264	0.0488012	0	31.6	1.51213	-	Not Available	2.563	2.942	2.419	2.42	2.616	2.505	2.444	2.508	2.69	2.677	2.66	2.453	2.551	2.561	2.649	2.526	2.891	2.344	2.613	2.643	2.602
pos_1681	15-deoxy-delta12,14-Prostaglandin A2	-	metab_758	B(i)	-	-	-	M+H	C20H28O3	8.4179	-	-	pos	-	-	-	-	-	-	317.21	0.0468987	31.3	0	-4.99923	-	-	2.929	2.91	2.655	2.876	2.817	3.121	2.854	2.649	2.936	2.812	2.992	2.738	2.756	2.948	2.902	2.82	3.186	2.664	2.916	2.887	2.926
pos_1684	Methyl trans-p-methoxycinnamate	反式-对甲氧基肉桂酸甲酯	metab_761	B(ii)	-	-	HMDB0030752	M+H-H2O	C11H12O3	8.4977	-	-	pos	-	-	-	-	Phenylpropanoids and polyketides	Cinnamic acids and derivatives	175.075	0.0260264	0	44.9	-1.86914	3901-07-03	Cinnamic acid esters	1.845	2.522	0.8264	1.182	1.295	1.455	1.259	0.8362	1.541	1.315	0.9778	0.8841	0.8752	1.561	1.608	1.79	1.691	0.8729	1.743	1.762	1.761
pos_1688	N-Phenylmethanesulfonamide	N -苯基甲磺酰胺	metab_765	B(ii)	-	-	HMDB0255229	M+2Na-H	C7H9NO2S	8.5321	-	-	pos	-	-	-	-	Benzenoids	Benzene and substituted derivatives	216.006	0.124737	0	75.6	-2.87904	-	Sulfanilides	1.499	1.759	0.7239	1.133	0.9677	0.9821	1.349	1.359	1.547	1.186	1.04	0.7791	1.273	1.197	1.367	0.8415	1.129	0.8186	1.365	1.31	1.414
pos_1701	PA(2:0/TXB2)	-	metab_781	B(ii)	-	-	HMDB0266523	M+H	C25H43O12P	8.6576	-	-	pos	-	-	-	-	Not Available	Not Available	567.259	0.0408174	0	35.2	4.49371	-	Not Available	2.664	2.861	1.411	2.269	2.014	2.148	2.521	2.24	2.696	2.241	2.445	1.736	1.553	2.485	2.623	2.703	2.706	1.822	2.53	2.542	2.565
pos_1725	Chenodeoxycholylarginine	鹅脱氧胆酰精氨酸	metab_807	B(ii)	-	-	HMDB0242396	M+ACN+H	C30H52N4O5	8.8535	-	-	pos	-	-	-	-	Lipids and lipid-like molecules	Steroids and steroid derivatives	590.428	0.0692361	0	42.4	-0.0703604	-	Bile acids, alcohols and derivatives	3.418	3.445	3.365	3.43	3.442	3.514	3.398	3.341	3.201	3.501	3.364	3.414	3.5	3.497	3.409	3.3	3.391	3.357	3.356	3.405	3.413
pos_1731	Lentinic acid	香菇酸	metab_814	B(ii)	-	-	HMDB0038385	M+H-H2O	C12H22N2O10S4	8.9462	-	-	pos	-	-	-	-	Organic acids and derivatives	Carboxylic acids and derivatives	465.01	0.070872	0	36.5	-5.39547	12705-98-5	Amino acids, peptides, and analogues	1.464	1.593	1.196	1.675	1.911	1.353	1.234	1.207	2.017	1.33	2.198	1.259	1.249	2.104	1.804	1.52	1.473	1.247	1.606	1.547	1.587
pos_1736	1-(4-(1-Azepanyl)-2-butynyl)azepane	1-（4-（1-氮杂环戊基）-2-丁酰基）氮杂环戊烷	metab_819	B(ii)	-	-	HMDB0243793	2M+NH4	C16H28N2	8.97	-	-	pos	-	-	-	-	Organoheterocyclic compounds	Azepanes	514.485	0.24479	0	96.4	1.51338	-	Not Available	1.139	0.8585	1.874	1.776	1.826	1.783	1.556	1.784	0.8433	1.476	1.461	1.667	1.956	1.498	1.643	1.678	1.519	1.826	1.552	1.494	1.689
pos_1748	PE(5-iso PGF2VI/14:0)	-	metab_832	B(ii)	-	-	HMDB0260615	M+H-2H2O	C37H68NO11P	9.0054	-	-	pos	-	-	-	-	Not Available	Not Available	698.435	0.0403616	0	62.1	-5.37198	-	Not Available	2.361	3.011	1.833	1.909	2.112	2.099	1.883	1.938	2.037	2.519	2.007	2.009	1.571	2.04	2.114	1.89	2.174	1.652	2.313	2.308	2.34
pos_1751	7,8-Dihydro-3b,6a-dihydroxy-alpha-ionol 9-glucoside	7,8-二氢-3b，6a-二羟基α-紫罗兰醇9-葡萄糖苷	metab_836	B(ii)	-	-	HMDB0041578	M+H	C19H34O8	9.0984	-	-	pos	-	-	-	-	Lipids and lipid-like molecules	Fatty Acyls	391.233	0.0304231	0	49.1	-0.107329	177261-75-5	Fatty acyl glycosides	2.535	2.736	2.469	2.561	2.629	2.511	2.379	2.38	2.424	2.619	2.552	2.352	2.576	2.554	2.606	2.539	2.569	2.397	2.566	2.55	2.576
pos_1756	Antiarrhythmic peptide	抗心律失常肽	metab_841	B(ii)	-	-	HMDB0248473	M+H-2H2O	C19H30N6O8	9.1567	-	-	pos	-	-	-	-	Organic acids and derivatives	Carboxylic acids and derivatives	435.201	0.117555	0	92.6	5.32005	-	Amino acids, peptides, and analogues	2.335	2.605	0.4672	1.53	0.5119	0.8654	0.4943	0.4749	2.153	1.165	1.698	0.5126	0.5055	1.769	0.5767	0.5651	0.5621	0.5037	1.443	1.344	1.406
pos_1757	PE(18:1(9Z)/0:0)	-	metab_842	B(i)	-	-	LMGP02050004	M+H	C23H46NO7P	9.1567	-	-	pos	-	-	-	-	-	-	480.309	0.0525761	51.7	0	1.05456	-	-	3.107	3.45	2.608	2.766	2.69	3.009	2.597	2.493	3.193	2.869	3.211	2.668	2.462	2.889	2.848	2.879	2.867	2.598	2.963	2.927	2.97
pos_1770	Sitosterol 3-O-(6'-O-stearyl-beta-D-glucoside)	谷甾醇3-O-（6'-O-硬脂酰基-β-D-葡萄糖苷）	metab_857	B(ii)	-	-	HMDB0302627	M+CH3OH+H	C53H94O7	9.2273	-	-	pos	-	-	-	-	Lipids and lipid-like molecules	Steroids and steroid derivatives	875.736	0.117707	0	36.6	2.53042	-	Stigmastanes and derivatives	1.691	1.713	2.06	1.996	1.935	2.241	1.834	1.882	0.971	1.996	1.188	1.859	2.042	1.62	1.93	1.487	1.806	1.907	1.917	1.985	2.019
pos_1785	(Z)-9-Cycloheptadecen-1-one	（Z） -9-环庚烯-1-酮	metab_873	B(ii)	-	-	HMDB0031336	M+NH4	C17H30O	9.4087	-	-	pos	-	-	-	-	Organic oxygen compounds	Organooxygen compounds	268.264	0.0693519	0	63.5	3.64068	542-46-1	Carbonyl compounds	3.173	3.017	3.32	3.216	3.164	2.963	3.172	3.157	2.995	3.004	3.037	3.024	3.227	3.214	3.126	3.146	3.16	3.128	3.226	3.172	3.178
pos_1811	1-Deoxymethylsphinganine	1 -脱氧甲基鞘氨醇	metab_903	B(i)	-	-	-	2M+Na	C17H37NO	9.8192	-	-	pos	-	-	-	-	-	-	565.566	0.221624	39.6	0	2.89712	-	-	4.53	4.388	4.554	4.613	4.542	4.282	4.358	4.306	4.268	4.231	4.23	4.381	4.394	4.335	4.257	4.353	4.375	4.269	4.48	4.315	4.327
pos_1828	2-(2-Cyclohexylethylhydrazono)propionic acid	2-（2-环己基乙基腙基）丙酸	metab_921	B(ii)	-	-	HMDB0249399	2M+Na	C11H20N2O2	10.0428	-	-	pos	-	-	-	-	Organic nitrogen compounds	Organonitrogen compounds	447.293	0.111328	0	46.8	-2.35528	-	Hydrazines and derivatives	2.521	2.5	2.455	2.542	2.371	2.514	2.273	2.3	2.268	2.491	2.385	2.317	2.421	2.403	2.417	2.17	2.275	2.435	2.498	2.438	2.404
pos_1844	4,4'-Dioctyldiphenylamine	4，4 ' -二辛基二苯胺	metab_939	B(i)	-	-	-	M+H	C28H43N	10.2556	-	-	pos	-	-	-	-	-	-	394.348	0.0802428	57.2	0	2.49995	-	-	3.771	3.824	3.822	3.852	3.844	3.841	3.733	3.715	3.617	3.805	3.686	3.822	3.847	3.794	3.754	3.714	3.801	3.703	3.786	3.724	3.786
pos_1862	28-Homobrassinolide	28-高芸苔素内酯	metab_959	B(ii)	-	-	HMDB0030423	M+Na	C29H50O6	11.2541	-	-	pos	-	-	-	-	Lipids and lipid-like molecules	Steroids and steroid derivatives	517.35	0.0592005	0	95	-0.504817	80483-89-2	Steroid lactones	2.042	1.858	2.065	1.775	2.054	1.884	1.866	1.775	1.824	1.832	1.71	2.068	1.757	1.805	2.004	1.928	1.782	1.933	1.924	1.931	1.883
pos_1880	LysoPA(0:0/18:2(9Z,12Z))	-	metab_979	B(ii)	-	-	HMDB0007852	M+Na	C21H39O7P	11.2884	-	-	pos	-	-	-	-	Lipids and lipid-like molecules	Glycerophospholipids	457.233	0.270345	0	37.8	-0.121965	-	Glycerophosphates	1.999	1.828	2.058	1.952	1.789	2.069	2.269	2.269	2.305	1.962	2.291	2.09	2.035	2.089	2.228	2.208	2.312	1.985	1.928	2.169	2.105
pos_1885	DG(i-17:0/0:0/PGF1alpha)	-	metab_984	B(ii)	-	-	HMDB0299542	M+2Na-H	C40H74O8	11.3002	-	-	pos	-	-	-	-	Not Available	Not Available	727.513	0.105516	0	54.9	5.67946	-	Not Available	1.607	1.465	1.555	1.617	1.599	1.556	1.686	1.368	1.351	1.509	1.361	1.412	1.645	1.429	1.508	1.398	1.525	1.53	1.427	1.364	1.345
pos_2451	Uridine 5'-diphosphate	尿苷5'-二磷酸	metab_1614	B(ii)	map01100;map00240;map01240;map01232;map00908	Metabolic pathways;Pyrimidine metabolism;Biosynthesis of cofactors;Nucleotide metabolism;Zeatin biosynthesis	PW_C000201;HMDB0000295	M+Na	C9H14N2O12P2	8.5206	代谢途径;嘧啶代谢;-;-;玉米素生物合成	C00015	pos	Nucleic acids	Nucleotides	Metabolism;Metabolism;Metabolism;Metabolism;Metabolism	Global and overview maps;Nucleotide metabolism;Global and overview maps;Global and overview maps;Metabolism of terpenoids and polyketides	Nucleosides, nucleotides, and analogues	Pyrimidine nucleotides	426.995	0.178088	0	30.1	8.0483	58-98-0	Pyrimidine ribonucleotides	1.829	2.127	0.6223	1.639	1.74	1.148	1.11	0.6311	2.507	0.7348	2.254	0.6743	1.479	2.257	2.029	1.729	1.35	0.6641	1.632	1.704	1.783
pos_1346	S-Adenosylmethionine	S-腺苷甲硫氨酸	metab_386	B(ii)	map01100;map01110;map00908;map00270;map01240;map00330;map00999;map01230;map00261;map04122	Metabolic pathways;Biosynthesis of secondary metabolites;Zeatin biosynthesis;Cysteine and methionine metabolism;Biosynthesis of cofactors;Arginine and proline metabolism;Biosynthesis of various plant secondary metabolites;Biosynthesis of amino acids;Monobactam biosynthesis;Sulfur relay system	PW_C000921;HMDB0001185	M+	C15H23N6O5S+	4.6743	代谢途径;次级代谢产物的生物合成;玉米素生物合成;半胱氨酸和蛋氨酸代谢;-;精氨酸和脯氨酸代谢;多种次生代谢产物的生物合成Ⅰ;氨基酸的生物合成;单巴坦生物合成;硫磺继电器系统	C00019	pos	Vitamins and cofactors	Cofactors	Metabolism;Metabolism;Metabolism;Metabolism;Metabolism;Metabolism;Metabolism;Metabolism;Metabolism;Genetic Information Processing	Global and overview maps;Global and overview maps;Metabolism of terpenoids and polyketides;Amino acid metabolism;Global and overview maps;Amino acid metabolism;Biosynthesis of other secondary metabolites;Global and overview maps;Biosynthesis of other secondary metabolites;Folding, sorting and degradation	Nucleosides, nucleotides, and analogues	5''-deoxyribonucleosides	399.143	0.195395	0	87.1	-6.31424	485-80-3;29908-03-0	5''-deoxy-5''-thionucleosides	0.404	0.4162	1.766	0.3352	0.3445	1.866	0.7964	2.217	1.554	1.864	1.375	0.8078	0.3395	0.4104	0.3966	1.299	0.3847	0.9662	1.387	1.418	1.536
pos_2908	S-Adenosylhomocysteine	S-腺苷同型半胱氨酸	metab_2121	B(ii)	map01100;map00270;map01230;map01240	Metabolic pathways;Cysteine and methionine metabolism;Biosynthesis of amino acids;Biosynthesis of cofactors	HMDB0000939;PW_C000749	M+CH3OH+H	C14H20N6O5S	5.736	代谢途径;半胱氨酸和蛋氨酸代谢;氨基酸的生物合成;-	C00021	pos	-	-	Metabolism;Metabolism;Metabolism;Metabolism	Global and overview maps;Amino acid metabolism;Global and overview maps;Global and overview maps	Organoheterocyclic compounds	Lactones	417.155	0.0682279	0	39.2	0.899186	979-92-0	Gamma butyrolactones	3.855	3.098	4.245	3.901	3.633	4.148	3.705	4.237	4.127	4.176	3.827	4.116	3.75	3.565	3.452	4.055	3.975	4.258	3.973	4.017	4.03
neg_396	Oxoglutaric acid	氧戊二酸	metab_4673	B(ii)	map01100;map00630;map00310;map01110;map00300;map01240;map01210;map00340;map00040;map00470;map00785;map00220;map00053;map00020;map00250;map01230;map01200;map00650;map00660;map00430	Metabolic pathways;Glyoxylate and dicarboxylate metabolism;Lysine degradation;Biosynthesis of secondary metabolites;Lysine biosynthesis;Biosynthesis of cofactors;2-Oxocarboxylic acid metabolism;Histidine metabolism;Pentose and glucuronate interconversions;D-Amino acid metabolism;Lipoic acid metabolism;Arginine biosynthesis;Ascorbate and aldarate metabolism;Citrate cycle (TCA cycle);Alanine, aspar…	HMDB0000208;PW_C000134	M+FA-H	C5H6O5	2.2506	代谢途径;乙醛酸和二羧酸代谢;赖氨酸降解;次级代谢产物的生物合成;赖氨酸生物合成;-;2-氧羰基酸代谢;组氨酸代谢;戊糖和葡萄糖醛酸的相互转化;-;硫辛酸代谢;精氨酸生物合成;抗坏血酸和醛酸代谢;柠檬酸循环（TCA循环）;丙氨酸、天冬氨酸和谷氨酸代谢;氨基酸的生物合成;碳代谢;丁酸代谢;C5支化二元酸代谢;牛磺酸和低牛磺酸代谢	C00026	neg	Organic acids	Carboxylic acids	Metabolism;Metabolism;Metabolism;Metabolism;Metabolism;Metabolism;Metabolism;Metabolism;Metabolism;Metabolism;Metabolism;Metabolism;Metabolism;Metabolism;Metabolism;Metabolism;Metabolism;Metabolism;Metabolism;Metabolism	Global and overview maps;Carbohydrate metabolism;Amino acid metabolism;Global and overview maps;Amino acid metabolism;Global and overview maps;Global and overview maps;Amino acid metabolism;Carbohydrate metabolism;Metabolism of other amino acids;Metabolism of cofactors and vitamins;Amino acid metabolism;Carbohydrate metabolism;Carbohydrate metabolism;Amino acid metabolism;Global and overview maps…	Organic acids and derivatives	Keto acids and derivatives	191.021	0.0842049	0	50.8	6.49306	328-50-7	Gamma-keto acids and derivatives	4.537	4.597	4.989	4.882	4.87	4.514	4.631	4.775	4.631	4.985	4.668	4.948	4.858	4.673	4.783	4.495	4.812	4.75	4.711	4.742	4.784
pos_1075	Acetic acid	乙酸	metab_85	B(ii)	map01100;map00630;map01110;map00920;map00908;map01200;map00620;map00010;map00440;map00660;map00430	Metabolic pathways;Glyoxylate and dicarboxylate metabolism;Biosynthesis of secondary metabolites;Sulfur metabolism;Zeatin biosynthesis;Carbon metabolism;Pyruvate metabolism;Glycolysis / Gluconeogenesis;Phosphonate and phosphinate metabolism;C5-Branched dibasic acid metabolism;Taurine and hypotaurine metabolism	HMDB0303567;HMDB0000532;PW_C000029;HMDB0000042;LMFA01010002	M+H	C2H4O2	0.5186	代谢途径;乙醛酸和二羧酸代谢;次级代谢产物的生物合成;硫代谢;玉米素生物合成;碳代谢;丙酮酸代谢;糖酵解/糖异生;膦酸盐和膦酸盐代谢;C5支化二元酸代谢;牛磺酸和低牛磺酸代谢	C00033	pos	Organic acids	Carboxylic acids	Metabolism;Metabolism;Metabolism;Metabolism;Metabolism;Metabolism;Metabolism;Metabolism;Metabolism;Metabolism;Metabolism	Global and overview maps;Carbohydrate metabolism;Global and overview maps;Energy metabolism;Metabolism of terpenoids and polyketides;Global and overview maps;Carbohydrate metabolism;Carbohydrate metabolism;Metabolism of other amino acids;Carbohydrate metabolism;Metabolism of other amino acids	Organic oxygen compounds	Organooxygen compounds	61.0285	0.193221	0	88.6	1.86339	543-24-8;64-19-7	Carbohydrates and carbohydrate conjugates	3.204	3.245	3.253	3.273	3.297	3.606	3.485	3.491	3.4	3.529	3.43	3.462	3.542	3.455	3.413	3.367	3.452	3.404	3.298	3.463	3.439
pos_3410	Succinic acid	琥珀酸	metab_2680	B(ii)	map01100;map00630;map00310;map01110;map00640;map00920;map00650;map01200;map00620;map00760;map00250;map00360;map00350;map00020;map00190	Metabolic pathways;Glyoxylate and dicarboxylate metabolism;Lysine degradation;Biosynthesis of secondary metabolites;Propanoate metabolism;Sulfur metabolism;Butanoate metabolism;Carbon metabolism;Pyruvate metabolism;Nicotinate and nicotinamide metabolism;Alanine, aspartate and glutamate metabolism;Phenylalanine metabolism;Tyrosine metabolism;Citrate cycle (TCA cycle);Oxidative phosphorylation	PW_C000174;HMDB0000254;LMFA01170043	M+NH4	C4H6O4	1.3613	代谢途径;乙醛酸和二羧酸代谢;赖氨酸降解;次级代谢产物的生物合成;丙酸代谢;硫代谢;丁酸代谢;碳代谢;丙酮酸代谢;烟酸和烟酰胺代谢;丙氨酸、天冬氨酸和谷氨酸代谢;苯丙氨酸代谢;酪氨酸代谢;柠檬酸循环（TCA循环）;氧化磷酸化	C00042	pos	Organic acids	Carboxylic acids	Metabolism;Metabolism;Metabolism;Metabolism;Metabolism;Metabolism;Metabolism;Metabolism;Metabolism;Metabolism;Metabolism;Metabolism;Metabolism;Metabolism;Metabolism	Global and overview maps;Carbohydrate metabolism;Amino acid metabolism;Global and overview maps;Carbohydrate metabolism;Energy metabolism;Carbohydrate metabolism;Global and overview maps;Carbohydrate metabolism;Metabolism of cofactors and vitamins;Amino acid metabolism;Amino acid metabolism;Amino acid metabolism;Carbohydrate metabolism;Energy metabolism	Organic acids and derivatives	Carboxylic acids and derivatives	136.061	0.111665	0	26.6	8.93183	110-15-6	Dicarboxylic acids and derivatives	3.04	3.013	2.838	2.896	2.868	3.003	3.135	2.965	3.17	3.032	3.168	2.957	3.088	3.268	3.35	3.158	3.198	3.066	3.077	3.081	3.16
pos_3530	L-Aspartic acid	L-天门冬氨酸	metab_2813	B(ii)	map02010;map01240;map00270;map01200;map00999;map00250;map00410;map00770;map00470;map00710;map01100;map00220;map00300;map01210;map00340;map01230;map00260;map00261;map01110;map00760;map00460;map00970	ABC transporters;Biosynthesis of cofactors;Cysteine and methionine metabolism;Carbon metabolism;Biosynthesis of various plant secondary metabolites;Alanine, aspartate and glutamate metabolism;beta-Alanine metabolism;Pantothenate and CoA biosynthesis;D-Amino acid metabolism;Carbon fixation in photosynthetic organisms;Metabolic pathways;Arginine biosynthesis;Lysine biosynthesis;2-Oxocarboxylic acid…	PW_C000123;HMDB0000191	M+H	C4H7NO4	1.1092	ABC转运蛋白;-;半胱氨酸和蛋氨酸代谢;碳代谢;多种次生代谢产物的生物合成Ⅰ;丙氨酸、天冬氨酸和谷氨酸代谢;β-丙氨酸代谢;泛酸和辅酶A生物合成;-;光合生物的固碳作用;代谢途径;精氨酸生物合成;赖氨酸生物合成;2-氧羰基酸代谢;组氨酸代谢;氨基酸的生物合成;甘氨酸、丝氨酸和苏氨酸代谢;单巴坦生物合成;次级代谢产物的生物合成;烟酸和烟酰胺代谢;氰基氨基酸代谢;氨酰tRNA生物合成	C00049	pos	Peptides;Hormones and transmitters	Amino acids;Neurotransmitters	Environmental Information Processing;Metabolism;Metabolism;Metabolism;Metabolism;Metabolism;Metabolism;Metabolism;Metabolism;Metabolism;Metabolism;Metabolism;Metabolism;Metabolism;Metabolism;Metabolism;Metabolism;Metabolism;Metabolism;Metabolism;Metabolism;Genetic Information Processing	Membrane transport;Global and overview maps;Amino acid metabolism;Global and overview maps;Biosynthesis of other secondary metabolites;Amino acid metabolism;Metabolism of other amino acids;Metabolism of cofactors and vitamins;Metabolism of other amino acids;Energy metabolism;Global and overview maps;Amino acid metabolism;Amino acid metabolism;Global and overview maps;Amino acid metabolism;Global …	Organic acids and derivatives	Carboxylic acids and derivatives	134.045	0.121683	0	94.1	-1.98499	56-84-8	Amino acids, peptides, and analogues	1.94	1.899	2.236	2.169	2.221	2.204	1.767	2.083	1.633	2.076	1.886	1.966	2.444	2.198	2.15	2.173	2.106	1.87	2.035	2.119	2.027
neg_858	Sulfate	硫酸盐	metab_5182	B(ii)	map01100;map01110;map00230;map00270;map02010;map00261;map00920	Metabolic pathways;Biosynthesis of secondary metabolites;Purine metabolism;Cysteine and methionine metabolism;ABC transporters;Monobactam biosynthesis;Sulfur metabolism	PW_C001118;HMDB0001448	M-H	H2O4S	11.4094	代谢途径;次级代谢产物的生物合成;嘌呤代谢;半胱氨酸和蛋氨酸代谢;ABC转运蛋白;单巴坦生物合成;硫代谢	C00059	neg	-	-	Metabolism;Metabolism;Metabolism;Metabolism;Environmental Information Processing;Metabolism;Metabolism	Global and overview maps;Global and overview maps;Nucleotide metabolism;Amino acid metabolism;Membrane transport;Biosynthesis of other secondary metabolites;Energy metabolism	Homogeneous non-metal compounds	Non-metal oxoanionic compounds	96.9604	0.0470512	0	59.9	3.37592	14808-79-8;7664-93-9	Non-metal sulfates	3.774	3.733	3.944	3.947	3.972	3.845	3.939	4.031	3.736	4.032	3.739	3.998	4.003	3.798	3.857	3.774	3.882	3.918	3.931	3.899	3.894
pos_3539	L-Glutamine	L-谷氨酰胺	metab_2822	B(i)	map01100;map00630;map00220;map02010;map00230;map01240;map01232;map00470;map00910;map01230;map00240;map00250;map00970;map00750	Metabolic pathways;Glyoxylate and dicarboxylate metabolism;Arginine biosynthesis;ABC transporters;Purine metabolism;Biosynthesis of cofactors;Nucleotide metabolism;D-Amino acid metabolism;Nitrogen metabolism;Biosynthesis of amino acids;Pyrimidine metabolism;Alanine, aspartate and glutamate metabolism;Aminoacyl-tRNA biosynthesis;Vitamin B6 metabolism	HMDB0003423;PW_C000500;HMDB0000641;MJDBOTE0000775	M+H	C5H10N2O3	1.0865	代谢途径;乙醛酸和二羧酸代谢;精氨酸生物合成;ABC转运蛋白;嘌呤代谢;-;-;-;氮代谢;氨基酸的生物合成;嘧啶代谢;丙氨酸、天冬氨酸和谷氨酸代谢;氨酰tRNA生物合成;维生素B6代谢	C00064	pos	Peptides	Amino acids	Metabolism;Metabolism;Metabolism;Environmental Information Processing;Metabolism;Metabolism;Metabolism;Metabolism;Metabolism;Metabolism;Metabolism;Metabolism;Genetic Information Processing;Metabolism	Global and overview maps;Carbohydrate metabolism;Amino acid metabolism;Membrane transport;Nucleotide metabolism;Global and overview maps;Global and overview maps;Metabolism of other amino acids;Energy metabolism;Global and overview maps;Nucleotide metabolism;Amino acid metabolism;Translation;Metabolism of cofactors and vitamins	Organic acids and derivatives	Carboxylic acids and derivatives	147.076	0.137488	77.5	0	-5.87866	5959-95-5;56-85-9	Amino acids, peptides, and analogues	3.77	3.947	3.89	3.746	3.961	4.092	3.701	3.719	3.837	3.601	4.227	3.843	4.308	3.962	4.054	3.84	3.894	3.541	3.819	3.933	3.92
neg_1449	L-Phenylalanine	苯丙氨酸	metab_4225	B(i)	map01100;map00996;map01110;map00970;map01210;map00960;map02010;map00999;map01230;map00966;map00460;map00940;map00470;map00360;map00400	Metabolic pathways;Biosynthesis of various alkaloids;Biosynthesis of secondary metabolites;Aminoacyl-tRNA biosynthesis;2-Oxocarboxylic acid metabolism;Tropane, piperidine and pyridine alkaloid biosynthesis;ABC transporters;Biosynthesis of various plant secondary metabolites;Biosynthesis of amino acids;Glucosinolate biosynthesis;Cyanoamino acid metabolism;Phenylpropanoid biosynthesis;D-Amino acid …	HMDB0250791;HMDB0000159;PW_C000104;MJDBAA00000196	M-H	C9H11NO2	3.1635	代谢途径;-;次级代谢产物的生物合成;氨酰tRNA生物合成;2-氧羰基酸代谢;托烷、哌啶和吡啶生物碱的生物合成;ABC转运蛋白;多种次生代谢产物的生物合成Ⅰ;氨基酸的生物合成;硫代葡萄糖苷生物合成;氰基氨基酸代谢;苯丙烷生物合成;-;苯丙氨酸代谢;苯丙氨酸、酪氨酸和色氨酸生物合成	C00079	neg	Peptides	Amino acids	Metabolism;Metabolism;Metabolism;Genetic Information Processing;Metabolism;Metabolism;Environmental Information Processing;Metabolism;Metabolism;Metabolism;Metabolism;Metabolism;Metabolism;Metabolism;Metabolism	Global and overview maps;Biosynthesis of other secondary metabolites;Global and overview maps;Translation;Global and overview maps;Biosynthesis of other secondary metabolites;Membrane transport;Biosynthesis of other secondary metabolites;Global and overview maps;Biosynthesis of other secondary metabolites;Metabolism of other amino acids;Biosynthesis of other secondary metabolites;Metabolism of ot…	Organic acids and derivatives	Carboxylic acids and derivatives	164.073	0.0833788	93.2	0	5.48417	63-91-2	Amino acids, peptides, and analogues	2.607	2.655	2.74	2.568	2.67	2.515	2.525	2.514	2.447	2.652	2.641	2.777	2.77	2.711	2.7	2.457	2.575	2.504	2.596	2.524	2.567
pos_41	Sucrose	蔗糖	metab_3073	B(i)	map01100;map00500;map01110;map02010;map00052	Metabolic pathways;Starch and sucrose metabolism;Biosynthesis of secondary metabolites;ABC transporters;Galactose metabolism	HMDB0000258;PW_C000177	M+K, 2M+K, M+Na, M+H	C12H22O11	1.2135	代谢途径;淀粉和蔗糖代谢;次级代谢产物的生物合成;ABC转运蛋白;半乳糖代谢	C00089	pos	Carbohydrates	Oligosaccharides	Metabolism;Metabolism;Metabolism;Environmental Information Processing;Metabolism	Global and overview maps;Carbohydrate metabolism;Global and overview maps;Membrane transport;Carbohydrate metabolism	Organic oxygen compounds	Organooxygen compounds	381.079	0.192763	79.1	0	-0.18945	57-50-1	Carbohydrates and carbohydrate conjugates	5.596	5.006	5.58	5.166	5.216	5.448	5.777	5.924	5.741	5.692	5.772	5.905	5.602	5.732	5.817	5.757	5.523	5.76	5.559	5.722	5.703
pos_1207	Uracil	尿嘧啶	metab_232	B(i)	map00240;map01100;map00770;map01232;map00410	Pyrimidine metabolism;Metabolic pathways;Pantothenate and CoA biosynthesis;Nucleotide metabolism;beta-Alanine metabolism	HMDB0000300;PW_C000204;MJDBOTE0000838	M+H	C4H4N2O2	2.6801	嘧啶代谢;代谢途径;泛酸和辅酶A生物合成;-;β-丙氨酸代谢	C00106	pos	Nucleic acids	Bases	Metabolism;Metabolism;Metabolism;Metabolism;Metabolism	Nucleotide metabolism;Global and overview maps;Metabolism of cofactors and vitamins;Global and overview maps;Metabolism of other amino acids	Organoheterocyclic compounds	Diazines	113.034	0.0648078	79.8	0	-2.45169	66-22-8	Pyrimidines and pyrimidine derivatives	2.539	2.523	2.508	2.422	2.492	2.621	2.559	2.503	2.646	2.624	2.712	2.651	2.6	2.624	2.724	2.593	2.665	2.559	2.579	2.611	2.636
pos_2076	Choline	胆碱	metab_1197	B(ii)	map01100;map00564;map02010;map00260	Metabolic pathways;Glycerophospholipid metabolism;ABC transporters;Glycine, serine and threonine metabolism	PW_C000065;HMDB0250194;HMDB0000097;MJDBOTE0000238	M+	C5H14NO+	11.2165	代谢途径;甘油磷脂代谢;ABC转运蛋白;甘氨酸、丝氨酸和苏氨酸代谢	C00114;C00919	pos	-	-	Metabolism;Metabolism;Environmental Information Processing;Metabolism	Global and overview maps;Lipid metabolism;Membrane transport;Amino acid metabolism	Organic acids and derivatives	Organic sulfuric acids and derivatives	104.107	0.187872	0	46.9	-6.60604	62-49-7	Sulfuric acid esters	1.941	1.933	1.919	1.815	1.803	0.8846	1.313	1.504	1.768	1.673	1.876	1.856	1.774	1.772	1.908	1.936	2.074	1.743	1.754	1.597	1.732
neg_415	Fumaric acid	延胡索酸	metab_4695	B(i)	map01100;map00220;map01110;map00350;map00650;map01200;map00620;map00760;map00250;map00360;map00020;map00190	Metabolic pathways;Arginine biosynthesis;Biosynthesis of secondary metabolites;Tyrosine metabolism;Butanoate metabolism;Carbon metabolism;Pyruvate metabolism;Nicotinate and nicotinamide metabolism;Alanine, aspartate and glutamate metabolism;Phenylalanine metabolism;Citrate cycle (TCA cycle);Oxidative phosphorylation	HMDB0000134;PW_C000088	M-H	C4H4O4	2.6449	代谢途径;精氨酸生物合成;次级代谢产物的生物合成;酪氨酸代谢;丁酸代谢;碳代谢;丙酮酸代谢;烟酸和烟酰胺代谢;丙氨酸、天冬氨酸和谷氨酸代谢;苯丙氨酸代谢;柠檬酸循环（TCA循环）;氧化磷酸化	C00122	neg	-	-	Metabolism;Metabolism;Metabolism;Metabolism;Metabolism;Metabolism;Metabolism;Metabolism;Metabolism;Metabolism;Metabolism;Metabolism	Global and overview maps;Amino acid metabolism;Global and overview maps;Amino acid metabolism;Carbohydrate metabolism;Global and overview maps;Carbohydrate metabolism;Metabolism of cofactors and vitamins;Amino acid metabolism;Amino acid metabolism;Carbohydrate metabolism;Energy metabolism	Organic acids and derivatives	Carboxylic acids and derivatives	115.004	0.0557786	8.91	0	3.67177	110-17-8	Dicarboxylic acids and derivatives	2.912	2.932	3.204	2.962	2.753	2.882	3.029	3.162	3.191	3.336	3.255	3.393	3.18	3.205	3.52	3.395	3.537	2.964	3.178	3.191	3.143
neg_1458	L-Leucine	L-亮氨酸	metab_4235	B(ii)	map01100;map01110;map00280;map00290;map01210;map02010;map01230;map00966;map00970	Metabolic pathways;Biosynthesis of secondary metabolites;Valine, leucine and isoleucine degradation;Valine, leucine and isoleucine biosynthesis;2-Oxocarboxylic acid metabolism;ABC transporters;Biosynthesis of amino acids;Glucosinolate biosynthesis;Aminoacyl-tRNA biosynthesis	HMDB0000687;PW_C000540;MJDBOTE0001078	M-H	C6H13NO2	2.8232	代谢途径;次级代谢产物的生物合成;缬氨酸、亮氨酸和异亮氨酸降解;缬氨酸、亮氨酸和异亮氨酸生物合成;2-氧羰基酸代谢;ABC转运蛋白;氨基酸的生物合成;硫代葡萄糖苷生物合成;氨酰tRNA生物合成	C00123	neg	Peptides	Amino acids	Metabolism;Metabolism;Metabolism;Metabolism;Metabolism;Environmental Information Processing;Metabolism;Metabolism;Genetic Information Processing	Global and overview maps;Global and overview maps;Amino acid metabolism;Amino acid metabolism;Global and overview maps;Membrane transport;Global and overview maps;Biosynthesis of other secondary metabolites;Translation	Organic acids and derivatives	Carboxylic acids and derivatives	130.088	0.178729	0	30.8	3.76147	61-90-5	Amino acids, peptides, and analogues	3.151	2.95	3.328	3.256	3.31	3.052	3.063	3.1	2.936	3.143	3.19	3.283	3.58	3.259	3.267	3.256	3.32	3.07	3.171	3.208	3.053
neg_1059	Oxidized Glutathione	氧化谷胱甘肽	metab_3794	B(i)	map01100;map00480;map01240	Metabolic pathways;Glutathione metabolism;Biosynthesis of cofactors	HMDB0003337;HMDB0011691;PW_C001847;MJDBOTE0000407	M-H2O-H	C20H32N6O12S2	6.6145	代谢途径;谷胱甘肽代谢;-	C00127	neg	-	-	Metabolism;Metabolism;Metabolism	Global and overview maps;Metabolism of other amino acids;Global and overview maps	Organic acids and derivatives	Carboxylic acids and derivatives	593.138	0.0700925	30.5	0	6.17911	15718-51-1;27025-41-8	Amino acids, peptides, and analogues	2.547	2.797	2.52	2.834	3.059	2.566	2.458	2.442	2.791	2.416	2.947	2.368	2.871	2.812	2.833	2.654	2.516	2.177	2.775	2.744	2.714
neg_1537	L-Histidine	組氨酸	metab_4320	B(ii)	map01100;map01110;map02010;map00340;map00470;map01230;map00970;map00410	Metabolic pathways;Biosynthesis of secondary metabolites;ABC transporters;Histidine metabolism;D-Amino acid metabolism;Biosynthesis of amino acids;Aminoacyl-tRNA biosynthesis;beta-Alanine metabolism	HMDB0000177;PW_C000116;MJDBOTE0000427	M-H	C6H9N3O2	1.0078	代谢途径;次级代谢产物的生物合成;ABC转运蛋白;组氨酸代谢;-;氨基酸的生物合成;氨酰tRNA生物合成;β-丙氨酸代谢	C00135	neg	Peptides	Amino acids	Metabolism;Metabolism;Environmental Information Processing;Metabolism;Metabolism;Metabolism;Genetic Information Processing;Metabolism	Global and overview maps;Global and overview maps;Membrane transport;Amino acid metabolism;Metabolism of other amino acids;Global and overview maps;Translation;Metabolism of other amino acids	Organic acids and derivatives	Carboxylic acids and derivatives	154.062	0.0783526	0	90.3	1.33297	71-00-1	Amino acids, peptides, and analogues	1.334	1.145	2.102	1.816	1.724	1.598	1.498	1.693	1.236	1.345	1.928	2.155	2.346	1.705	2.048	1.728	1.916	1.339	1.735	1.7	1.668
pos_3491	L-Proline	脯氨酸	metab_2769	B(i)	map01100;map01110;map02010;map00330;map01230;map00332;map00970;map00470	Metabolic pathways;Biosynthesis of secondary metabolites;ABC transporters;Arginine and proline metabolism;Biosynthesis of amino acids;Carbapenem biosynthesis;Aminoacyl-tRNA biosynthesis;D-Amino acid metabolism	HMDB0251528;HMDB0000162;PW_C000106;MJDBOTE0000527	M+H	C5H9NO2	1.202	代谢途径;次级代谢产物的生物合成;ABC转运蛋白;精氨酸和脯氨酸代谢;氨基酸的生物合成;碳青霉烯生物合成;氨酰tRNA生物合成;-	C00148	pos	Peptides	Amino acids	Metabolism;Metabolism;Environmental Information Processing;Metabolism;Metabolism;Metabolism;Genetic Information Processing;Metabolism	Global and overview maps;Global and overview maps;Membrane transport;Amino acid metabolism;Global and overview maps;Biosynthesis of other secondary metabolites;Translation;Metabolism of other amino acids	Organic acids and derivatives	Carboxylic acids and derivatives	116.07	0.119079	96.3	0	-1.57787	147-85-3	Amino acids, peptides, and analogues	4.061	4.318	3.801	3.537	3.8	4.002	4.014	3.874	4.003	3.865	4.351	4.032	4.202	4.18	4.217	4.163	3.997	3.823	3.991	4.089	4.079
neg_1502	Malic acid	苹果酸	metab_5345	B(ii)	map01100;map00630;map01110;map01200;map00620;map00710;map00020	Metabolic pathways;Glyoxylate and dicarboxylate metabolism;Biosynthesis of secondary metabolites;Carbon metabolism;Pyruvate metabolism;Carbon fixation in photosynthetic organisms;Citrate cycle (TCA cycle)	HMDB0000156;PW_C000592	M-H	C4H6O5	1.2733	代谢途径;乙醛酸和二羧酸代谢;次级代谢产物的生物合成;碳代谢;丙酮酸代谢;光合生物的固碳作用;柠檬酸循环（TCA循环）	C00149	neg	Organic acids	Carboxylic acids	Metabolism;Metabolism;Metabolism;Metabolism;Metabolism;Metabolism;Metabolism	Global and overview maps;Carbohydrate metabolism;Global and overview maps;Global and overview maps;Carbohydrate metabolism;Energy metabolism;Carbohydrate metabolism	Organic acids and derivatives	Hydroxy acids and derivatives	133.015	0.138392	0	76	4.40071	6915-15-7;617-48-1;97-67-6	Beta hydroxy acids and derivatives	3.318	3.178	3.651	3.507	3.31	3.426	3.624	3.849	3.352	3.563	3.515	3.727	3.634	3.594	3.617	3.668	3.609	3.593	3.509	3.534	3.416
neg_1532	L-Asparagine	L-天门冬酰胺	metab_4315	B(ii)	map01100;map01110;map00460;map01230;map00250;map00970	Metabolic pathways;Biosynthesis of secondary metabolites;Cyanoamino acid metabolism;Biosynthesis of amino acids;Alanine, aspartate and glutamate metabolism;Aminoacyl-tRNA biosynthesis	PW_C000110;HMDB0251512;HMDB0000168;MJDBOTE0000518	M-H	C4H8N2O3	1.0078	代谢途径;次级代谢产物的生物合成;氰基氨基酸代谢;氨基酸的生物合成;丙氨酸、天冬氨酸和谷氨酸代谢;氨酰tRNA生物合成	C00152	neg	Peptides	Amino acids	Metabolism;Metabolism;Metabolism;Metabolism;Metabolism;Genetic Information Processing	Global and overview maps;Global and overview maps;Metabolism of other amino acids;Global and overview maps;Amino acid metabolism;Translation	Organic acids and derivatives	Carboxylic acids and derivatives	131.047	0.0772363	0	82.3	3.00907	70-47-3	Amino acids, peptides, and analogues	1.829	2.003	1.898	1.892	2.131	1.981	1.649	1.609	1.649	1.629	2.022	2.211	2.314	2.053	2.185	1.88	1.947	1.528	1.935	1.883	1.947
neg_278	Citric acid	柠檬酸	metab_4542	B(i)	map01100;map00630;map01110;map01240;map01210;map01200;map01230;map00250;map00020	Metabolic pathways;Glyoxylate and dicarboxylate metabolism;Biosynthesis of secondary metabolites;Biosynthesis of cofactors;2-Oxocarboxylic acid metabolism;Carbon metabolism;Biosynthesis of amino acids;Alanine, aspartate and glutamate metabolism;Citrate cycle (TCA cycle)	HMDB0000094;PW_C000063	M-H2O-H, M-H	C6H8O7	2.6669	代谢途径;乙醛酸和二羧酸代谢;次级代谢产物的生物合成;-;2-氧羰基酸代谢;碳代谢;氨基酸的生物合成;丙氨酸、天冬氨酸和谷氨酸代谢;柠檬酸循环（TCA循环）	C00158	neg	Organic acids	Carboxylic acids	Metabolism;Metabolism;Metabolism;Metabolism;Metabolism;Metabolism;Metabolism;Metabolism;Metabolism	Global and overview maps;Carbohydrate metabolism;Global and overview maps;Global and overview maps;Global and overview maps;Global and overview maps;Global and overview maps;Amino acid metabolism;Carbohydrate metabolism	Organic acids and derivatives	Carboxylic acids and derivatives	191.021	0.0479843	68.5	0	4.70103	77-92-9	Tricarboxylic acids and derivatives	4.196	4.339	4.488	4.191	4.222	3.964	4.058	4.194	4.189	4.405	4.15	4.359	4.169	4.217	4.18	4.038	4.257	4.295	4.255	4.25	4.216
pos_2109	DG(18:3(9Z,12Z,15Z)/16:0/0:0)	-	metab_1234	B(ii)	-	-	PW_C003352;HMDB0007301	M+H	C37H66O5	10.1551	-	C00165	pos	-	-	-	-	Lipids and lipid-like molecules	Fatty Acyls	591.5	0.0823709	0	34.9	3.32234	-	Lineolic acids and derivatives	2.337	2.396	2.062	2.187	2.186	2.058	2.136	1.17	2.377	2.018	2.367	2.153	1.84	2.17	2.25	2.218	2.136	2.107	2.106	2.148	2.177
pos_2462	DG(8:0/8:0/0:0)	-	metab_1626	B(ii)	-	-	PW_C062137;HMDB0116368	M+H-2H2O	C19H36O5	8.4292	-	C00165	pos	-	-	-	-	Lipids and lipid-like molecules	Glycerolipids	309.242	0.0422165	0	42.3	-1.19541	-	Diradylglycerols	2.206	2.332	2.099	2.217	2.64	2.644	2.575	2.269	2.434	2.454	2.738	2.154	2.437	2.232	2.492	2.66	2.653	2.237	2.472	2.496	2.508
pos_983	DG(20:4(8Z,11Z,14Z,17Z)/18:0/0:0)	-	metab_3709	B(ii)	-	-	HMDB0007535;PW_C003586	M+H-H2O, M+Na	C41H72O5	11.2541	-	C00165	pos	-	-	-	-	Lipids and lipid-like molecules	Glycerolipids	627.534	0.246773	0	41.6	-0.322044	-	Diradylglycerols	2.622	2.463	2.644	2.447	2.627	2.581	2.618	2.511	2.394	2.485	2.307	2.515	2.519	2.438	2.609	2.481	2.413	2.361	2.598	2.408	2.439
pos_1835	DG(14:0/16:1(9Z)/0:0)	-	metab_929	B(ii)	-	-	HMDB0007012;PW_C003063	M+NH4	C33H62O5	10.0991	-	C00165	pos	-	-	-	-	Lipids and lipid-like molecules	Glycerolipids	556.495	0.0611175	0	38.3	2.90479	-	Diradylglycerols	2.516	1.801	2.561	2.431	2.323	2.466	2.469	2.217	2.513	1.971	2.783	2.587	2.426	2.442	2.536	2.577	2.449	2.318	2.554	2.519	2.571
pos_2997	4-(Aminobutyl)guanidine	4-（氨基丁基）胍	metab_2219	B(ii)	map01100;map01110;map00330;map00999	Metabolic pathways;Biosynthesis of secondary metabolites;Arginine and proline metabolism;Biosynthesis of various plant secondary metabolites	HMDB0001432;HMDB0246298	M+K	C5H14N4	5.2411	代谢途径;次级代谢产物的生物合成;精氨酸和脯氨酸代谢;多种次生代谢产物的生物合成Ⅰ	C00179	pos	-	-	Metabolism;Metabolism;Metabolism;Metabolism	Global and overview maps;Global and overview maps;Amino acid metabolism;Biosynthesis of other secondary metabolites	Organic nitrogen compounds	Organonitrogen compounds	169.086	0.0803199	0	49	9.08873	306-60-5	Guanidines	1.835	2.358	0.3333	0.7184	0.3699	1.954	0.3554	0.3395	0.4335	0.4154	0.4345	0.3705	0.6344	1.226	1.135	0.524	0.8656	0.3631	1.317	1.331	1.379
pos_1138	L-Valine	L-缬氨酸	metab_155	B(i)	map01100;map01110;map00280;map01240;map01210;map00460;map02010;map01230;map00966;map00290;map00970;map00770	Metabolic pathways;Biosynthesis of secondary metabolites;Valine, leucine and isoleucine degradation;Biosynthesis of cofactors;2-Oxocarboxylic acid metabolism;Cyanoamino acid metabolism;ABC transporters;Biosynthesis of amino acids;Glucosinolate biosynthesis;Valine, leucine and isoleucine biosynthesis;Aminoacyl-tRNA biosynthesis;Pantothenate and CoA biosynthesis	PW_C000704;HMDB0000883;MJDBOTE0000526	M+H	C5H11NO2	1.2815	代谢途径;次级代谢产物的生物合成;缬氨酸、亮氨酸和异亮氨酸降解;-;2-氧羰基酸代谢;氰基氨基酸代谢;ABC转运蛋白;氨基酸的生物合成;硫代葡萄糖苷生物合成;缬氨酸、亮氨酸和异亮氨酸生物合成;氨酰tRNA生物合成;泛酸和辅酶A生物合成	C00183	pos	Peptides	Amino acids	Metabolism;Metabolism;Metabolism;Metabolism;Metabolism;Metabolism;Environmental Information Processing;Metabolism;Metabolism;Metabolism;Genetic Information Processing;Metabolism	Global and overview maps;Global and overview maps;Amino acid metabolism;Global and overview maps;Global and overview maps;Metabolism of other amino acids;Membrane transport;Global and overview maps;Biosynthesis of other secondary metabolites;Amino acid metabolism;Translation;Metabolism of cofactors and vitamins	Organic acids and derivatives	Carboxylic acids and derivatives	118.086	0.120706	96.1	0	-1.80775	72-18-4	Amino acids, peptides, and analogues	3.584	3.579	3.785	3.712	3.779	3.882	3.689	3.768	3.68	3.782	3.97	3.759	4.026	3.894	3.944	3.754	3.817	3.494	3.661	3.767	3.725
pos_3535	L-Threonine	L-苏氨酸	metab_2818	B(i)	map01100;map01110;map02010;map00290;map00470;map00860;map01230;map00260;map00261;map00970	Metabolic pathways;Biosynthesis of secondary metabolites;ABC transporters;Valine, leucine and isoleucine biosynthesis;D-Amino acid metabolism;Porphyrin metabolism;Biosynthesis of amino acids;Glycine, serine and threonine metabolism;Monobactam biosynthesis;Aminoacyl-tRNA biosynthesis	HMDB0000167;PW_C000109;MJDBOTE0000464	M+H	C4H9NO3	1.0977	代谢途径;次级代谢产物的生物合成;ABC转运蛋白;缬氨酸、亮氨酸和异亮氨酸生物合成;-;卟啉与叶绿素代谢;氨基酸的生物合成;甘氨酸、丝氨酸和苏氨酸代谢;单巴坦生物合成;氨酰tRNA生物合成	C00188	pos	Peptides	Amino acids	Metabolism;Metabolism;Environmental Information Processing;Metabolism;Metabolism;Metabolism;Metabolism;Metabolism;Metabolism;Genetic Information Processing	Global and overview maps;Global and overview maps;Membrane transport;Amino acid metabolism;Metabolism of other amino acids;Metabolism of cofactors and vitamins;Global and overview maps;Amino acid metabolism;Biosynthesis of other secondary metabolites;Translation	Organic acids and derivatives	Carboxylic acids and derivatives	120.065	0.147199	60	0	-4.41251	72-19-5	Amino acids, peptides, and analogues	2.87	2.891	2.946	2.751	2.883	3.03	2.769	2.816	3.063	2.841	3.341	2.997	3.239	3.217	3.289	3.171	2.968	2.525	2.935	3.061	3.035
neg_1510	Gluconolactone	葡萄糖内酯	metab_4292	B(ii)	map01100;map00030;map01110;map01200	Metabolic pathways;Pentose phosphate pathway;Biosynthesis of secondary metabolites;Carbon metabolism	PW_C000097;HMDB0000150;MJDBOTE0000432	M+FA-H	C6H10O6	1.2513	代谢途径;戊糖磷酸途径;次级代谢产物的生物合成;碳代谢	C00198	neg	-	-	Metabolism;Metabolism;Metabolism;Metabolism	Global and overview maps;Carbohydrate metabolism;Global and overview maps;Global and overview maps	Organic oxygen compounds	Organooxygen compounds	223.047	0.2385	0	58	4.32918	90-80-2	Carbohydrates and carbohydrate conjugates	2.541	1.79	3.179	3.04	2.929	2.994	3.147	3.265	2.861	2.852	2.893	3.183	3.291	2.556	2.892	3.218	3.022	3.113	2.982	2.984	2.787
pos_3309	Lactosamine	氨基乳糖苷	metab_2567	B(ii)	map01100;map00520;map01250	Metabolic pathways;Amino sugar and nucleotide sugar metabolism;Biosynthesis of nucleotide sugars	HMDB0006591	M+H	C12H23NO10	3.0874	代谢途径;氨基糖和核苷酸糖代谢;-	C00203	pos	-	-	Metabolism;Metabolism;Metabolism	Global and overview maps;Carbohydrate metabolism;Global and overview maps	Lipids and lipid-like molecules	Fatty Acyls	342.141	0.220774	0	52.8	3.84292	13000-25-4	Fatty acyl glycosides	1.794	1.922	1.801	1.468	1.847	1.912	2.284	2.189	2.404	1.85	2.335	2.166	1.842	2.208	2.192	2.408	2.061	2.393	1.994	2.114	2.188
pos_1755	DADP	-	metab_840	B(ii)	map01100;map01232;map00230	Metabolic pathways;Nucleotide metabolism;Purine metabolism	PW_C001161;HMDB0001508	M+Na	C10H15N5O9P2	9.1334	代谢途径;-;嘌呤代谢	C00206	pos	Nucleic acids	Nucleotides	Metabolism;Metabolism;Metabolism	Global and overview maps;Global and overview maps;Nucleotide metabolism	Nucleosides, nucleotides, and analogues	Purine nucleotides	434.025	0.125564	0	89.5	2.08038	2793-06-08	Purine deoxyribonucleotides	2.037	2.365	0.5435	2.346	2.35	2.18	1.238	0.5517	2.551	1.404	2.772	0.5924	2.161	2.747	2.641	2.453	2.276	0.5828	2.235	2.146	2.25
pos_1218	Adenosine	腺苷	metab_244	B(i)	map01100;map02010;map01232;map00230	Metabolic pathways;ABC transporters;Nucleotide metabolism;Purine metabolism	HMDB0247583;PW_C000034;HMDB0000050;MJDBOTE0000767	M+H	C10H13N5O4	2.7701	代谢途径;ABC转运蛋白;-;嘌呤代谢	C00212	pos	Nucleic acids	Nucleosides	Metabolism;Environmental Information Processing;Metabolism;Metabolism	Global and overview maps;Membrane transport;Global and overview maps;Nucleotide metabolism	Nucleosides, nucleotides, and analogues	Purine nucleosides	268.104	0.069239	97.3	0	0.168627	58-61-7	Not Available	4.188	4.107	4.315	4.104	4.134	4.262	4.094	4.236	4.223	4.119	4.37	4.306	4.364	4.288	4.29	4.18	4.287	4.075	4.196	4.248	4.25
pos_3318	Guanine	鸟嘌呤	metab_2577	B(i)	map01100;map01232;map00230	Metabolic pathways;Nucleotide metabolism;Purine metabolism	PW_C000086;HMDB0000132;MJDBOTE0000457	M+H	C5H5N5O	2.8374	代谢途径;-;嘌呤代谢	C00242	pos	Nucleic acids	Bases	Metabolism;Metabolism;Metabolism	Global and overview maps;Global and overview maps;Nucleotide metabolism	Organoheterocyclic compounds	Imidazopyrimidines	152.057	0.150266	90.3	0	-0.611467	73-40-5	Purines and purine derivatives	2.697	2.822	2.838	2.501	2.47	2.683	2.62	2.854	2.585	2.701	2.684	2.731	2.605	2.56	2.656	2.431	2.477	2.558	2.734	2.611	2.645
pos_1570	Palmitic acid	棕榈酸	metab_635	B(ii)	map01100;map00071;map01212;map00073;map00061;map00062;map01040	Metabolic pathways;Fatty acid degradation;Fatty acid metabolism;Cutin, suberine and wax biosynthesis;Fatty acid biosynthesis;Fatty acid elongation;Biosynthesis of unsaturated fatty acids	HMDB0303203;LMFA01010001;HMDB0000220;PW_C000145	M+NH4	C16H32O2	7.0423	代谢途径;脂肪酸降解;脂肪酸代谢;角质、木栓碱和蜡的生物合成;脂肪酸生物合成;脂肪酸伸长;不饱和脂肪酸的生物合成	C00249	pos	Lipids	Fatty acids	Metabolism;Metabolism;Metabolism;Metabolism;Metabolism;Metabolism;Metabolism	Global and overview maps;Lipid metabolism;Global and overview maps;Lipid metabolism;Lipid metabolism;Lipid metabolism;Lipid metabolism	Lipids and lipid-like molecules	Fatty Acyls	274.274	0.192068	0	58.3	1.1466	1957-10-03	Fatty acids and conjugates	4.487	4.53	4.494	4.412	4.435	4.513	4.55	4.636	4.551	4.655	4.641	4.563	4.663	4.695	4.729	4.59	4.705	4.638	4.382	4.528	4.544
pos_1910	Glycolaldehyde	羟乙醛	metab_1013	B(ii)	map01100;map00630;map00040;map00750;map00790	Metabolic pathways;Glyoxylate and dicarboxylate metabolism;Pentose and glucuronate interconversions;Vitamin B6 metabolism;Folate biosynthesis	PW_C001850;HMDB0003344	M+H	C2H4O2	11.9103	代谢途径;乙醛酸和二羧酸代谢;戊糖和葡萄糖醛酸的相互转化;维生素B6代谢;叶酸合成	C00266	pos	-	-	Metabolism;Metabolism;Metabolism;Metabolism;Metabolism	Global and overview maps;Carbohydrate metabolism;Carbohydrate metabolism;Metabolism of cofactors and vitamins;Metabolism of cofactors and vitamins	Organic oxygen compounds	Organooxygen compounds	61.0285	0.116629	0	57.2	1.53889	141-46-8	Carbonyl compounds	3.105	3.087	3.172	3.209	3.185	3.303	3.234	3.246	3.051	3.173	3.157	3.162	3.232	3.174	3.205	3.187	3.154	3.136	3.116	3.195	3.104
neg_1536	Alpha-D-Glucose	-	metab_4319	B(ii)	map01100;map01110;map01250;map00520;map01200;map00051;map00052;map00010	Metabolic pathways;Biosynthesis of secondary metabolites;Biosynthesis of nucleotide sugars;Amino sugar and nucleotide sugar metabolism;Carbon metabolism;Fructose and mannose metabolism;Galactose metabolism;Glycolysis / Gluconeogenesis	PW_C001851;HMDB0003345	M+FA-H	C6H12O6	1.0078	代谢途径;次级代谢产物的生物合成;-;氨基糖和核苷酸糖代谢;碳代谢;果糖和甘露糖代谢;半乳糖代谢;糖酵解/糖异生	C00267	neg	-	-	Metabolism;Metabolism;Metabolism;Metabolism;Metabolism;Metabolism;Metabolism;Metabolism	Global and overview maps;Global and overview maps;Global and overview maps;Carbohydrate metabolism;Global and overview maps;Carbohydrate metabolism;Carbohydrate metabolism;Carbohydrate metabolism	Organic oxygen compounds	Organooxygen compounds	225.063	0.0886934	0	91.1	5.07213	492-62-6	Carbohydrates and carbohydrate conjugates	1.52	0.9306	2	1.723	1.676	1.701	2.001	2.109	1.858	1.88	1.934	2.095	2.098	1.731	2.124	1.906	1.969	1.828	1.83	1.875	1.8
pos_1626	D-Sedoheptulose 7-phosphate	D -景天庚酮糖-7-磷酸	metab_697	B(ii)	map01100;map01110;map01250;map01200;map00710;map01230;map00030	Metabolic pathways;Biosynthesis of secondary metabolites;Biosynthesis of nucleotide sugars;Carbon metabolism;Carbon fixation in photosynthetic organisms;Biosynthesis of amino acids;Pentose phosphate pathway	HMDB0001068;PW_C000843	M+K	C7H15O10P	7.6076	代谢途径;次级代谢产物的生物合成;-;碳代谢;光合生物的固碳作用;氨基酸的生物合成;戊糖磷酸途径	C00281;C05382	pos	-	-	Metabolism;Metabolism;Metabolism;Metabolism;Metabolism;Metabolism;Metabolism	Global and overview maps;Global and overview maps;Global and overview maps;Global and overview maps;Energy metabolism;Global and overview maps;Carbohydrate metabolism	Organic oxygen compounds	Organooxygen compounds	329.005	0.258766	0	64.5	6.83789	2646-35-7;89927-08-2	Carbohydrates and carbohydrate conjugates	2.47	2.504	2.452	2.484	2.487	2.638	2.625	2.553	2.606	2.71	2.601	2.635	2.71	2.698	2.674	2.544	2.565	2.499	2.418	2.65	2.587
pos_1210	Uridine	尿苷	metab_236	B(i)	map00240;map01100;map02010;map01232	Pyrimidine metabolism;Metabolic pathways;ABC transporters;Nucleotide metabolism	PW_C000202;HMDB0000296;MJDBOTE0000788	M+H	C9H12N2O6	2.6912	嘧啶代谢;代谢途径;ABC转运蛋白;-	C00299	pos	Nucleic acids	Nucleosides	Metabolism;Metabolism;Environmental Information Processing;Metabolism	Nucleotide metabolism;Global and overview maps;Membrane transport;Global and overview maps	Nucleosides, nucleotides, and analogues	Pyrimidine nucleosides	245.077	0.0829731	85.5	0	1.13694	58-96-8	Not Available	1.775	1.852	1.948	1.804	2.048	2.002	1.894	1.907	2.002	1.963	1.986	1.954	1.942	1.943	2.096	1.878	1.999	1.843	1.978	1.924	1.912
pos_1095	L-Glutamic Acid	L-谷氨酸	metab_107	B(i)	map02010;map01240;map01200;map00330;map00220;map00332;map00250;map00630;map00430;map00470;map00860;map01100;map00480;map01210;map00340;map00524;map01230;map01110;map00660;map00460;map00650;map00910;map00970	ABC transporters;Biosynthesis of cofactors;Carbon metabolism;Arginine and proline metabolism;Arginine biosynthesis;Carbapenem biosynthesis;Alanine, aspartate and glutamate metabolism;Glyoxylate and dicarboxylate metabolism;Taurine and hypotaurine metabolism;D-Amino acid metabolism;Porphyrin metabolism;Metabolic pathways;Glutathione metabolism;2-Oxocarboxylic acid metabolism;Histidine metabolism;N…	PW_C000095;HMDB0060475;HMDB0000148;HMDB0003339;MJDBOTE0000649	M+H	C5H9NO4	1.0977	ABC转运蛋白;-;碳代谢;精氨酸和脯氨酸代谢;精氨酸生物合成;碳青霉烯生物合成;丙氨酸、天冬氨酸和谷氨酸代谢;乙醛酸和二羧酸代谢;牛磺酸和低牛磺酸代谢;-;卟啉与叶绿素代谢;代谢途径;谷胱甘肽代谢;2-氧羰基酸代谢;组氨酸代谢;新霉素、卡那霉素和庆大霉素生物合成;氨基酸的生物合成;次级代谢产物的生物合成;C5支化二元酸代谢;氰基氨基酸代谢;丁酸代谢;氮代谢;氨酰tRNA生物合成	C00302;C00025;C00217	pos	-;Peptides;Hormones and transmitters;Peptides	-;Amino acids;Neurotransmitters;Amino acids	Environmental Information Processing;Metabolism;Metabolism;Metabolism;Metabolism;Metabolism;Metabolism;Metabolism;Metabolism;Metabolism;Metabolism;Metabolism;Metabolism;Metabolism;Metabolism;Metabolism;Metabolism;Metabolism;Metabolism;Metabolism;Metabolism;Metabolism;Genetic Information Processing	Membrane transport;Global and overview maps;Global and overview maps;Amino acid metabolism;Amino acid metabolism;Biosynthesis of other secondary metabolites;Amino acid metabolism;Carbohydrate metabolism;Metabolism of other amino acids;Metabolism of other amino acids;Metabolism of cofactors and vitamins;Global and overview maps;Metabolism of other amino acids;Global and overview maps;Amino acid me…	Organic acids and derivatives	Carboxylic acids and derivatives	148.06	0.144401	97.3	0	-4.47875	6893-26-1;56-86-0	Amino acids, peptides, and analogues	2.756	2.835	2.59	2.736	2.766	2.882	2.43	2.492	2.423	2.91	2.667	2.582	2.797	2.853	2.765	2.7	2.798	2.501	2.675	2.75	2.801
pos_42	Amylopectin	支链淀粉	metab_3084	B(ii)	-	-	HMDB0003255	M+Na, M+K, 2M+3H2O+2H, M+H+Na	C30H52O26	1.2476	-	C00317	pos	-	-	-	-	Organic oxygen compounds	Organooxygen compounds	867.242	0.130236	0	34.7	5.16698	9037-22-3	Carbohydrates and carbohydrate conjugates	4.598	4.199	4.903	4.59	4.537	5.096	5.113	5.066	5.079	5.04	4.911	5.046	4.676	4.404	4.752	4.955	5.029	5.391	4.856	4.96	4.955
pos_1226	L-Carnitine	L-肉碱	metab_253	B(ii)	-	-	PW_C000044;HMDB0000062;MJDBOTE0000806	M+ACN+H	C7H15NO3	2.9974	-	C00318	pos	-	-	-	-	Organic nitrogen compounds	Organonitrogen compounds	203.139	0.152595	0	30.3	1.19247	541-15-1	Quaternary ammonium salts	1.784	2.24	1.669	1.581	1.704	1.949	1.713	1.571	1.711	1.866	1.958	1.758	1.854	2.023	2.183	1.916	2.062	1.653	1.805	1.9	1.937
pos_1644	Sphingosine	鞘氨醇	metab_717	B(i)	map00600;map01100	Sphingolipid metabolism;Metabolic pathways	LMSP01010001;PW_C000172;HMDB0000252	M+H	C18H37NO2	7.8479	鞘脂代谢;代谢途径	C00319	pos	-	-	Metabolism;Metabolism	Lipid metabolism;Global and overview maps	Organic nitrogen compounds	Organonitrogen compounds	300.29	0.0648745	73.6	0	2.61457	123-78-4	Amines	1.955	2.355	1.924	2.071	2.285	2.098	2.288	2.079	2.157	1.79	2.315	2.166	2.398	2.341	2.53	2.151	2.295	1.816	2.137	2.192	2.161
pos_1653	PE(20:4(5Z,8Z,11Z,14Z)/20:5(5Z,8Z,11Z,14Z,17Z))	-	metab_727	B(ii)	map01100;map00564;map01110;map00563;map04136	Metabolic pathways;Glycerophospholipid metabolism;Biosynthesis of secondary metabolites;Glycosylphosphatidylinositol (GPI)-anchor biosynthesis;Autophagy - other	LMGP02010955;PW_C005449;HMDB0009401	M+ACN+Na	C45H72NO8P	7.9278	代谢途径;甘油磷脂代谢;次级代谢产物的生物合成;糖基磷脂酰肌醇（GPI）-锚生物合成;自噬-其他	C00350	pos	Lipids	Phospholipids	Metabolism;Metabolism;Metabolism;Metabolism;Cellular Processes	Global and overview maps;Lipid metabolism;Global and overview maps;Glycan biosynthesis and metabolism;Transport and catabolism	Lipids and lipid-like molecules	Glycerophospholipids	849.51	0.0542564	0	31.9	-6.27391	-	Glycerophosphoethanolamines	2.256	2.342	2.464	2.424	2.393	2.483	2.443	2.337	2.158	2.379	2.214	2.324	2.221	2.283	2.269	2.313	2.273	2.27	2.318	2.316	2.276
pos_2421	Sterol	甾醇	metab_1581	B(ii)	-	-	HMDB0060512	M+H	C17H28O	8.7037	-	C00370	pos	-	-	-	-	Lipids and lipid-like molecules	Steroids and steroid derivatives	249.221	0.0506359	0	35	-3.03053	-	Hydroxysteroids	1.379	1.062	0.3798	1.126	1.089	1.349	1.875	1.059	1.514	1.511	1.674	1.308	1.261	1.464	1.613	1.388	2.018	0.7549	1.458	1.488	1.448
pos_1225	Zeatin	玉米素	metab_252	B(i)	map01100;map01110;map04075;map00908	Metabolic pathways;Biosynthesis of secondary metabolites;Plant hormone signal transduction;Zeatin biosynthesis	HMDB0012204;MJDBZSJ0000114	M+ACN+H	C10H13N5O	2.9187	代谢途径;次级代谢产物的生物合成;植物激素信号转导;玉米素生物合成	C00371	pos	-	-	Metabolism;Metabolism;Environmental Information Processing;Metabolism	Global and overview maps;Global and overview maps;Signal transduction;Metabolism of terpenoids and polyketides	Organoheterocyclic compounds	Imidazopyrimidines	261.145	0.0577119	35.6	0	-4.1661	1637-39-4	Purines and purine derivatives	2.268	2.496	2.256	2.039	2.186	2.386	2.297	2.115	2.266	2.346	2.45	2.332	2.371	2.534	2.566	2.415	2.523	2.202	2.369	2.366	2.41
pos_3240	Astin I	-	metab_2491	B(ii)	-	-	HMDB0041419	M+Na	C25H34ClN5O7	3.371	-	C00373	pos	-	-	-	-	Organic acids and derivatives	Peptidomimetics	574.209	0.198826	0	37.1	9.2652	161162-22-7	Hybrid peptides	2.915	2.49	2.611	2.616	2.342	2.51	2.572	2.441	2.697	2.44	2.823	2.496	2.471	2.762	2.752	2.726	2.673	2.497	2.744	2.6	2.604
pos_2233	Ubiquinone-1	泛醌- 1	metab_1372	B(ii)	map01100;map00130;map01110;map00190;map01240	Metabolic pathways;Ubiquinone and other terpenoid-quinone biosynthesis;Biosynthesis of secondary metabolites;Oxidative phosphorylation;Biosynthesis of cofactors	HMDB0001304;HMDB0002012	M+CH3OH+H	C14H18O4	9.4427	代谢途径;泛醌和其他萜类醌生物合成;次级代谢产物的生物合成;氧化磷酸化;-	C00399;C00390	pos	-	-	Metabolism;Metabolism;Metabolism;Metabolism;Metabolism	Global and overview maps;Metabolism of cofactors and vitamins;Global and overview maps;Energy metabolism;Global and overview maps	Lipids and lipid-like molecules	Prenol lipids	283.152	0.0781607	0	46.1	-8.6999	56275-39-9;727-81-1	Quinone and hydroquinone lipids	2.604	2.707	2.689	2.625	2.692	2.741	2.565	2.566	2.533	2.761	2.615	2.612	2.82	2.662	2.726	2.555	2.557	2.542	2.677	2.681	2.619
pos_1737	PA(i-20:0/i-12:0)	-	metab_820	B(ii)	map01100;map00564;map01110;map00561;map04070	Metabolic pathways;Glycerophospholipid metabolism;Biosynthesis of secondary metabolites;Glycerolipid metabolism;Phosphatidylinositol signaling system	PW_C064234;HMDB0115848	M+H-2H2O	C35H69O8P	8.97	代谢途径;甘油磷脂代谢;次级代谢产物的生物合成;甘油酯代谢;磷脂酰肌醇信号系统	C00416	pos	Lipids	Phospholipids	Metabolism;Metabolism;Metabolism;Metabolism;Environmental Information Processing	Global and overview maps;Lipid metabolism;Global and overview maps;Lipid metabolism;Signal transduction	Lipids and lipid-like molecules	Glycerophospholipids	613.454	0.237524	0	56.4	-7.87746	-	Glycerophosphates	1.857	1.861	0.3685	2.132	2.245	2.028	1.236	0.3751	1.208	1.6	1.744	0.4081	1.626	2.269	1.79	1.558	1.818	0.5848	1.586	1.673	1.786
pos_3228	Shikimic acid	莽草酸	metab_2477	B(ii)	map01100;map00996;map01110;map01240;map00999;map01230;map00400	Metabolic pathways;Biosynthesis of various alkaloids;Biosynthesis of secondary metabolites;Biosynthesis of cofactors;Biosynthesis of various plant secondary metabolites;Biosynthesis of amino acids;Phenylalanine, tyrosine and tryptophan biosynthesis	HMDB0003070	M+H-2H2O	C7H10O5	3.4615	代谢途径;-;次级代谢产物的生物合成;-;多种次生代谢产物的生物合成Ⅰ;氨基酸的生物合成;苯丙氨酸、酪氨酸和色氨酸生物合成	C00493	pos	-	-	Metabolism;Metabolism;Metabolism;Metabolism;Metabolism;Metabolism;Metabolism	Global and overview maps;Biosynthesis of other secondary metabolites;Global and overview maps;Global and overview maps;Biosynthesis of other secondary metabolites;Global and overview maps;Amino acid metabolism	Organic oxygen compounds	Organooxygen compounds	139.038	0.298344	0	80.6	-5.74503	138-59-0	Alcohols and polyols	1.081	0.4756	1.309	1.027	0.3976	1.138	1.541	1.566	1.483	0.4451	0.913	1.566	0.9439	0.8354	1.014	1.404	0.751	1.634	1.061	1.312	1.267
neg_744	Biliverdin	胆绿素	metab_5057	B(ii)	map01100;map01110;map00860	Metabolic pathways;Biosynthesis of secondary metabolites;Porphyrin metabolism	HMDB0001008;PW_C000797	M-H	C33H34N4O6	7.189	代谢途径;次级代谢产物的生物合成;卟啉与叶绿素代谢	C00500	neg	-	-	Metabolism;Metabolism;Metabolism	Global and overview maps;Global and overview maps;Metabolism of cofactors and vitamins	Organoheterocyclic compounds	Tetrapyrroles and derivatives	581.244	0.113327	0	53.1	6.65227	114-25-0	Bilirubins	1.378	0.727	1.763	2.247	1.885	1.639	1.887	1.993	2.775	1.293	2.426	1.55	2.064	1.687	1.952	1.995	2.456	1.177	2.146	2.052	2.081
pos_2735	Cyclic AMP	环化 AMP	metab_1929	B(ii)	map01100;map00230	Metabolic pathways;Purine metabolism	HMDB0000058	2M+NH4	C10H12N5O6P	6.512	代谢途径;嘌呤代谢	C00575	pos	Nucleic acids	Cyclic nucleotides	Metabolism;Metabolism	Global and overview maps;Nucleotide metabolism	Nucleosides, nucleotides, and analogues	Purine nucleotides	676.14	0.0897872	0	42.2	2.02109	60-92-4	Cyclic purine nucleotides	0.6428	0.9156	0.6751	1.826	0.5653	0.7189	2.022	2.032	1.855	1.43	1.383	1.824	0.5586	1.866	1.363	1.342	1.607	1.166	1.523	1.448	1.499
neg_203	Prostaglandin E2	前列腺素E2	metab_4460	B(ii)	map01100;map00590	Metabolic pathways;Arachidonic acid metabolism	HMDB0001220;LMFA03010003;PW_C000949;MJDBOTE0001141	M-H, M+FA-H	C20H32O5	7.0763	代谢途径;花生四烯酸代谢	C00584	neg	Lipids	Eicosanoids	Metabolism;Metabolism	Global and overview maps;Lipid metabolism	Lipids and lipid-like molecules	Fatty Acyls	397.222	0.0692492	0	35.9	-3.87481	363-24-6	Eicosanoids	3.393	2.977	3.974	3.765	3.763	3.725	3.904	4.011	3.52	3.868	3.592	3.998	3.969	3.489	3.8	3.751	3.857	3.854	3.789	3.773	3.73
neg_1319	4-Hydroxybenzaldehyde	4-羟基苯甲醛	metab_4082	B(ii)	map01100	Metabolic pathways	HMDB0011718;MJDBOTE0000554	M-H	C7H6O2	4.748	代谢途径	C00633	neg	-	-	Metabolism	Global and overview maps	Organic oxygen compounds	Organooxygen compounds	121.03	0.168939	0	57.1	1.21099	123-08-0	Carbonyl compounds	2.078	1.71	0.651	1.306	0.9552	1.227	1.098	0.2755	2.211	2.104	2.433	1.282	1.222	1.937	2.189	1.811	1.877	0.2496	1.991	1.87	2.012
pos_2808	Indoleacetaldehyde	吲哚乙醛	metab_2010	B(ii)	map01100;map00380	Metabolic pathways;Tryptophan metabolism	PW_C000926;HMDB0001190	M+H	C10H9NO	6.0954	代谢途径;色氨酸代谢	C00637	pos	-	-	Metabolism;Metabolism	Global and overview maps;Amino acid metabolism	Organoheterocyclic compounds	Indoles and derivatives	160.075	0.094545	0	70.8	-2.99778	2591-98-2	Indoles	1.794	1.716	0.5924	1.588	1.725	0.8155	1.397	0.5435	1.779	1.901	1.949	1.341	1.583	1.957	1.915	1.863	1.665	0.4744	1.721	1.755	1.801
pos_3253	5-Hydroxy-L-tryptophan	5-羟色氨酸	metab_2505	B(ii)	map01100;map00380	Metabolic pathways;Tryptophan metabolism	HMDB0000472;PW_C000358	M+CH3OH+H	C11H12N2O3	3.3132	代谢途径;色氨酸代谢	C00643	pos	-	-	Metabolism;Metabolism	Global and overview maps;Amino acid metabolism	Organoheterocyclic compounds	Indoles and derivatives	253.118	0.105702	0	37	0.463906	4350-09-08	Tryptamines and derivatives	1.733	1.841	1.739	1.416	1.606	1.653	1.763	1.584	1.719	1.671	1.894	1.88	1.737	1.874	1.903	1.697	1.773	1.741	1.712	1.782	1.799
pos_3529	Betaine	甜菜碱	metab_2811	B(i)	map01100;map02010;map00260	Metabolic pathways;ABC transporters;Glycine, serine and threonine metabolism	PW_C000030;HMDB0000043;MJDBTMA0000064	M+H	C5H11NO2	1.1203	代谢途径;ABC转运蛋白;甘氨酸、丝氨酸和苏氨酸代谢	C00719	pos	-	-	Metabolism;Environmental Information Processing;Metabolism	Global and overview maps;Membrane transport;Amino acid metabolism	Organic acids and derivatives	Carboxylic acids and derivatives	118.086	0.0803255	94.8	0	-3.21512	6915-17-9;107-43-7	Amino acids, peptides, and analogues	2.176	2.424	1.964	1.934	2.323	2.273	2.219	2.217	2.012	2.33	2.287	2.269	2.046	2.164	2.094	2.002	2.069	2.105	2.149	2.209	2.212
pos_1360	Vanillin	香兰素	metab_402	B(i)	map01100;map00996;map01110	Metabolic pathways;Biosynthesis of various alkaloids;Biosynthesis of secondary metabolites	HMDB0245834;HMDB0012308;MJDBOTE0000374	M+H	C8H8O3	4.8701	代谢途径;-;次级代谢产物的生物合成	C00755	pos	-	-	Metabolism;Metabolism;Metabolism	Global and overview maps;Biosynthesis of other secondary metabolites;Global and overview maps	Benzenoids	Phenols	153.054	0.292941	71.6	0	-2.00287	121-33-5	Methoxyphenols	2.069	1.551	1.502	1.714	1.838	1.96	1.981	2.044	2.227	2.222	2.186	1.857	1.727	1.936	2.055	2.111	2.06	1.96	1.879	1.995	2.131
pos_3237	Serotonin	血清素	metab_2487	B(ii)	map01100;map01110;map00380	Metabolic pathways;Biosynthesis of secondary metabolites;Tryptophan metabolism	PW_C000178;HMDB0000259;MJDBSJD0000073	M+H-H2O	C10H12N2O	3.3822	代谢途径;次级代谢产物的生物合成;色氨酸代谢	C00780	pos	Peptides;Hormones and transmitters	Amines;Neurotransmitters	Metabolism;Metabolism;Metabolism	Global and overview maps;Global and overview maps;Amino acid metabolism	Organoheterocyclic compounds	Indoles and derivatives	159.091	0.0101834	0	41.3	-1.85366	50-67-9	Tryptamines and derivatives	2.98	2.853	2.71	2.716	2.528	2.612	2.793	2.615	2.861	2.839	3.026	2.836	2.788	3.006	3.012	2.982	2.783	2.65	2.859	2.851	2.857
pos_3236	(+/-)-Tryptophan	-	metab_2486	B(ii)	-	-	HMDB0030396	2M+H	C11H12N2O2	3.3822	-	C00806	pos	-	-	-	-	Organoheterocyclic compounds	Indoles and derivatives	409.185	0.107023	0	71.8	-5.04624	1954-12-06	Indolyl carboxylic acids and derivatives	2.459	2.346	2.01	1.815	1.698	2.07	2.059	1.742	2.204	2.151	2.437	2.214	2.123	2.455	2.425	2.289	2.141	1.89	2.148	2.199	2.241
pos_1305	Sphinganine	鞘氨醇	metab_341	B(ii)	map00600;map01100	Sphingolipid metabolism;Metabolic pathways	PW_C000184;HMDB0242634;LMSP01020001;HMDB0000269	M+K	C18H39NO2	4.2291	鞘脂代谢;代谢途径	C00836	pos	-	-	Metabolism;Metabolism	Lipid metabolism;Global and overview maps	Organic nitrogen compounds	Organonitrogen compounds	340.26	0.00521201	0	43.5	-4.57777	764-22-7	Amines	4.211	4.23	4.307	4.34	4.349	4.268	4.232	4.244	4.086	4.324	4.205	4.288	4.422	4.303	4.319	4.209	4.293	4.23	4.267	4.263	4.264
pos_2520	(-)-Menthone	（-）-薄荷酮	metab_1691	B(ii)	map01110;map00902	Biosynthesis of secondary metabolites;Monoterpenoid biosynthesis	LMPR0102090004;HMDB0035162	M+NH4	C10H18O	7.9393	次级代谢产物的生物合成;单萜生物合成	C00843	pos	-	-	Metabolism;Metabolism	Global and overview maps;Metabolism of terpenoids and polyketides	Lipids and lipid-like molecules	Prenol lipids	172.17	0.0227396	0	81.6	0.936725	14073-97-3	Monoterpenoids	3.113	2.955	3.188	3.244	3.137	3.039	3.085	3.054	3.004	3.066	2.952	3.094	3.149	3.051	3.027	3.085	3.156	3.11	3.107	3.091	3.109
neg_470	Chlorogenic acid	绿原酸	metab_4756	B(ii)	map00940;map00941;map01110;map00945	Phenylpropanoid biosynthesis;Flavonoid biosynthesis;Biosynthesis of secondary metabolites;Stilbenoid, diarylheptanoid and gingerol biosynthesis	HMDB0003164;HMDB0040690	M+FA-H	C16H18O9	3.9049	苯丙烷生物合成;类黄酮生物合成;次级代谢产物的生物合成;二苯乙烯类、二芳基庚烷类和姜辣素生物合成	C00852	neg	-	-	Metabolism;Metabolism;Metabolism;Metabolism	Biosynthesis of other secondary metabolites;Biosynthesis of other secondary metabolites;Global and overview maps;Biosynthesis of other secondary metabolites	Organic oxygen compounds	Organooxygen compounds	399.094	0.134466	0	60	0.749857	327-97-9;202650-88-2;202650-88-2	Alcohols and polyols	2.106	0.4182	2.755	1.775	0.3124	2.653	1.795	3.588	3.062	1.952	2.517	2.638	1.108	0.3098	0.3266	2.525	1.008	3.088	2.762	2.681	2.652
pos_442	Pantothenic Acid	泛酸	metab_3109	B(i)	map01100;map01110;map00770;map00410;map01240	Metabolic pathways;Biosynthesis of secondary metabolites;Pantothenate and CoA biosynthesis;beta-Alanine metabolism;Biosynthesis of cofactors	HMDB0250782;PW_C000136;HMDB0000210;MJDBOTE0000845	M+H-H2O, M+H	C9H17NO5	3.2787	代谢途径;次级代谢产物的生物合成;泛酸和辅酶A生物合成;β-丙氨酸代谢;-	C00864	pos	Vitamins and cofactors	Vitamins	Metabolism;Metabolism;Metabolism;Metabolism;Metabolism	Global and overview maps;Global and overview maps;Metabolism of cofactors and vitamins;Metabolism of other amino acids;Global and overview maps	Organic acids and derivatives	Carboxylic acids and derivatives	220.118	0.0182798	31.9	0	1.25677	79-83-4	Amino acids, peptides, and analogues	3.288	3.338	2.852	2.845	2.741	2.97	2.928	2.903	3.064	2.977	3.15	2.894	2.946	3.331	3.166	3.089	3.007	2.94	3.073	3.086	3.088
pos_1156	Aminomalonic acid	氨基丙二酸	metab_175	B(ii)	-	-	HMDB0001147	M+CH3OH+H	C3H5NO4	1.3725	-	C00872	pos	-	-	-	-	Organic acids and derivatives	Carboxylic acids and derivatives	152.056	0.00897433	0	52.4	8.90723	1068-84-4	Amino acids, peptides, and analogues	2.283	2.628	2.117	2.267	1.998	2.281	2.303	2.286	2.311	2.384	2.431	2.542	2.477	2.578	2.661	2.225	2.505	2.287	2.422	2.417	2.415
pos_1415	Indole-3-Carboxaldehyde	吲哚-3-甲醛	metab_463	B(i)	map01100;map00230;map02010;map01232;map00380;map04075	Metabolic pathways;Purine metabolism;ABC transporters;Nucleotide metabolism;Tryptophan metabolism;Plant hormone signal transduction	HMDB0000197;HMDB0000195;HMDB0029737;MJDBSJD0000088	M+H	C9H7NO	5.6049	代谢途径;嘌呤代谢;ABC转运蛋白;-;色氨酸代谢;植物激素信号转导	C00954;C08493;C00294	pos	-	-	Metabolism;Metabolism;Environmental Information Processing;Metabolism;Metabolism;Environmental Information Processing	Global and overview maps;Nucleotide metabolism;Membrane transport;Global and overview maps;Amino acid metabolism;Signal transduction	Organoheterocyclic compounds	Indoles and derivatives	146.06	0.0847565	64.2	0	-0.706893	87-51-4;58-63-9;487-89-8	Indolyl carboxylic acids and derivatives	2.845	2.851	2.289	2.571	2.491	2.53	2.555	2.298	2.825	2.863	2.968	2.38	2.474	2.99	2.921	2.887	2.686	2.327	2.688	2.76	2.744
pos_1930	Pantolactone	DL-泛酰内酯	metab_1035	B(ii)	-	-	HMDB0059876;HMDB0303902	M+H-2H2O	C7H12O2	11.3459	-	C01012	pos	-	-	-	-	Organoheterocyclic compounds	Lactones	93.0695	0.143608	0	63	-3.28563	599-04-2	Gamma butyrolactones	1.4	1.813	1.786	1.842	1.987	1.928	1.86	2.069	1.811	1.872	1.945	1.943	1.872	1.865	1.683	1.844	1.987	1.829	1.881	1.789	1.769
pos_1088	4-Guanidinobutanoic acid	4 -胍基丁酸	metab_99	B(ii)	map01100;map00330	Metabolic pathways;Arginine and proline metabolism	HMDB0003464;HMDB0031842	M+H-2H2O	C5H11N3O2	1.075	代谢途径;精氨酸和脯氨酸代谢	C01035	pos	-	-	Metabolism;Metabolism	Global and overview maps;Amino acid metabolism	Organic acids and derivatives	Carboxylic acids and derivatives	110.071	0.0882882	0	62.9	-2.05588	463-00-3;500-65-2	Amino acids, peptides, and analogues	2.181	2.245	2.261	1.952	2.022	2.153	2.02	1.98	1.876	1.741	2.46	2.383	2.68	2.294	2.419	2.211	2.355	1.908	2.154	2.224	2.219
pos_3477	N-Carbamoylsarcosine	N-氨甲酰肌氨酸	metab_2753	B(ii)	map01100;map00330	Metabolic pathways;Arginine and proline metabolism	HMDB0012265	M+H	C4H8N2O3	1.2248	代谢途径;精氨酸和脯氨酸代谢	C01043	pos	-	-	Metabolism;Metabolism	Global and overview maps;Amino acid metabolism	Organic acids and derivatives	Carboxylic acids and derivatives	133.061	0.116718	0	49.9	-0.25548	-	Amino acids, peptides, and analogues	2.49	2.651	2.443	2.296	2.474	2.604	2.03	2.118	2.329	2.158	2.675	2.669	2.843	2.803	2.983	2.54	2.569	2.031	2.572	2.568	2.655
neg_526	8-Amino-7-oxononanoic acid	8-氨基-7-酮基纳米酸	metab_4818	B(ii)	map01100;map00780;map01240	Metabolic pathways;Biotin metabolism;Biosynthesis of cofactors	HMDB0240687;LMFA01060168	M-H	C9H17NO3	4.7368	代谢途径;生物素代谢;-	C01092	neg	-	-	Metabolism;Metabolism;Metabolism	Global and overview maps;Metabolism of cofactors and vitamins;Global and overview maps	Lipids and lipid-like molecules	Fatty Acyls	186.114	0.214646	0	65.6	3.26924	682799-71-9	Fatty acids and conjugates	2.665	2.322	2.016	2.683	2.897	2.127	2.714	2.421	2.448	1.469	2.096	2.965	2.868	2.196	2.54	1.287	1.949	2.761	2.566	2.409	2.594
pos_3325	Orotidine	乳清苷	metab_2585	B(ii)	map00240;map01100;map01240	Pyrimidine metabolism;Metabolic pathways;Biosynthesis of cofactors	HMDB0000788	M+2Na-H	C10H12N2O8	2.7476	嘧啶代谢;代谢途径;-	C01103	pos	-	-	Metabolism;Metabolism;Metabolism	Nucleotide metabolism;Global and overview maps;Global and overview maps	Nucleosides, nucleotides, and analogues	Pyrimidine nucleosides	333.03	0.181332	0	34.3	-1.1308	314-50-1	Not Available	2.22	2.567	2.303	2.302	2.228	2.133	1.198	1.669	2.094	2.45	2.184	1.976	1.96	2.383	1.922	1.545	2.14	1.55	2.004	2.159	2.133
neg_1551	Glycerophosphoinositol	甘油磷酸肌醇	metab_4336	B(ii)	-	-	HMDB0011649	M-H	C9H19O11P	0.9849	-	C01225	neg	-	-	-	-	Lipids and lipid-like molecules	Glycerophospholipids	333.06	0.095009	0	40.5	2.55349	129830-95-1	Glycerophosphoinositols	2.004	1.155	3.069	2.767	2.649	2.555	2.436	2.767	2.795	2.111	3.06	2.896	3.036	2.787	2.542	2.785	2.606	2.177	2.588	2.67	2.641
pos_679	3,7-Dimethylquercetin	3,7-二甲基槲皮素	metab_3371	B(ii)	map01110;map00944	Biosynthesis of secondary metabolites;Flavone and flavonol biosynthesis	HMDB0029263	M+H, M+Na	C17H14O7	6.643	次级代谢产物的生物合成;黄酮和黄酮醇生物合成	C01265	pos	-	-	Metabolism;Metabolism	Global and overview maps;Biosynthesis of other secondary metabolites	Phenylpropanoids and polyketides	Flavonoids	331.082	0.0460876	0	53.2	1.82683	2068-02-02	O-methylated flavonoids	3.241	1.637	3.828	1.558	1.357	1.935	3.351	4.001	4.278	3.751	2.945	4.045	2.121	2.54	2.042	2.625	1.593	4.281	3.638	3.665	3.678
neg_1192	Quercetin 3,7-Dimethyl Ether	槲皮素3，7 -二甲醚	metab_3941	B(i)	map01110;map00944	Biosynthesis of secondary metabolites;Flavone and flavonol biosynthesis	LMPK12112731;HMDB0029263	M-H	C17H14O7	5.6764	次级代谢产物的生物合成;黄酮和黄酮醇生物合成	C01265	neg	-	-	Metabolism;Metabolism	Global and overview maps;Biosynthesis of other secondary metabolites	Phenylpropanoids and polyketides	Flavonoids	329.067	0.0607258	55	0	1.45119	2068-02-02	O-methylated flavonoids	2.138	1.63	2.056	1.509	1.424	1.807	1.952	2.336	2.431	1.933	1.852	2.323	1.431	1.851	1.431	1.571	1.284	2.645	2.001	2.053	2.034
neg_1273	MS 3	-	metab_4031	B(ii)	-	-	HMDB0036557	M+FA-H	C21H24O7	5.0826	-	C01553	neg	-	-	-	-	Phenylpropanoids and polyketides	Depsides and depsidones	433.151	0.109124	0	33.6	2.50595	58265-74-0	Not Available	2.062	1.504	2.875	2.392	1.845	2.879	2.435	3.2	2.668	2.77	2.117	2.685	1.845	1.516	1.548	2.497	2.396	2.842	2.583	2.494	2.515
pos_1732	Linoleic Acid	亚油酸	metab_815	B(i)	map01100;map00591;map01040	Metabolic pathways;Linoleic acid metabolism;Biosynthesis of unsaturated fatty acids	HMDB0006270;LMFA01030120;HMDB0247706;PW_C000530;HMDB0000673;MJDBOTE0000548	M+NH4	C18H32O2	8.9579	代谢途径;亚油酸;不饱和脂肪酸的生物合成	C01595	pos	Lipids	Fatty acids	Metabolism;Metabolism;Metabolism	Global and overview maps;Lipid metabolism;Lipid metabolism	Lipids and lipid-like molecules	Fatty Acyls	298.273	0.0310347	35.6	0	-4.33207	506-21-8;60-33-3	Lineolic acids and derivatives	3.192	3.097	3.051	3.256	3.242	3.119	3.058	3.014	3.066	3.043	3.085	3.101	3.209	3.168	3.127	3.081	3.194	3.145	3.147	3.138	3.164
pos_2439	Phthalic Acid	酞酸	metab_1600	B(i)	map01100;map02010	Metabolic pathways;ABC transporters	HMDB0002107;MJDBOTE0000627	M+H-H2O	C8H6O4	8.6347	代谢途径;ABC转运蛋白	C01606	pos	-	-	Metabolism;Environmental Information Processing	Global and overview maps;Membrane transport	Benzenoids	Benzene and substituted derivatives	149.023	0.0688503	45.8	0	-1.08807	88-99-3	Benzoic acids and derivatives	3.568	3.661	3.45	3.55	3.496	3.668	3.547	3.496	3.524	3.612	3.604	3.457	3.606	3.606	3.61	3.481	3.588	3.442	3.515	3.56	3.573
neg_1483	Stachyose	水苏糖	metab_4263	B(i)	map01100;map00052	Metabolic pathways;Galactose metabolism	PW_C001923;HMDB0003553;MJDBOTE0000475	M+FA-H	C24H42O21	2.5786	代谢途径;半乳糖代谢	C01613	neg	-	-	Metabolism;Metabolism	Global and overview maps;Carbohydrate metabolism	Organic oxygen compounds	Organooxygen compounds	711.224	0.0256522	81	0	5.42883	470-55-3;10094-58-3;470-55-3	Carbohydrates and carbohydrate conjugates	3.471	2.867	3.97	3.81	3.889	3.988	4.202	4.105	3.875	3.963	3.85	4.096	3.928	3.471	3.803	3.975	4.029	4.308	3.907	3.929	3.915
pos_2444	Vindoline	文多林	metab_1606	B(ii)	map01100;map01110;map00901	Metabolic pathways;Biosynthesis of secondary metabolites;Indole alkaloid biosynthesis	HMDB0259814	M+ACN+H	C25H32N2O6	8.5662	代谢途径;次级代谢产物的生物合成;吲哚生物碱生物合成	C01626	pos	-	-	Metabolism;Metabolism;Metabolism	Global and overview maps;Global and overview maps;Biosynthesis of other secondary metabolites	Alkaloids and derivatives	Plumeran-type alkaloids	498.261	0.0885832	0	32.9	2.24916	2182-14-1	Not Available	2.22	2.593	1.513	1.644	1.608	1.62	1.608	0.6635	2.076	1.944	2.332	1.381	0.6408	2.174	2.044	1.97	2.002	1.252	1.94	2.012	2.003
neg_1364	Bz-Arg-OEt	-	metab_4132	B(ii)	-	-	HMDB0249494	M+K-2H	C15H22N4O3	4.2975	-	C01670	neg	-	-	-	-	Benzenoids	Benzene and substituted derivatives	343.118	0.0884048	0	34.9	1.95818	-	Benzoic acids and derivatives	2.574	1.629	2.441	2.367	2.174	2.288	2.548	2.62	2.766	2.464	2.409	2.686	2.217	2.105	2	2.435	2.182	2.618	2.411	2.472	2.403
pos_556	Chitobiose	壳二糖	metab_3235	B(ii)	map01100;map00520;map02010	Metabolic pathways;Amino sugar and nucleotide sugar metabolism;ABC transporters	PW_C001925;HMDB0003556;HMDB0062702	M+H-H2O, M+Na	C15H26N2O12	5.2177	代谢途径;氨基糖和核苷酸糖代谢;ABC转运蛋白	C01674	pos	-	-	Metabolism;Metabolism;Environmental Information Processing	Global and overview maps;Carbohydrate metabolism;Membrane transport	Organic oxygen compounds	Organooxygen compounds	409.149	0.0355426	0	31.7	9.22697	35061-50-8;577-76-4	Carbohydrates and carbohydrate conjugates	2.679	1.897	2.727	2.442	2.248	2.64	2.657	2.815	2.943	2.628	2.924	2.842	2.506	2.533	2.611	2.698	2.512	2.743	2.666	2.673	2.695
pos_3281	Nopalinic acid	壬二酸	metab_2536	B(ii)	-	-	HMDB0029437	M+H-2H2O	C10H18N2O6	3.2672	-	C01683	pos	-	-	-	-	Organic acids and derivatives	Carboxylic acids and derivatives	227.102	0.0875062	0	31.7	-1.17159	63409-16-5	Amino acids, peptides, and analogues	2.008	2.272	1.484	1.689	1.669	1.781	1.406	1.582	1.93	1.912	1.988	1.477	1.439	1.876	1.682	1.77	1.644	1.616	1.825	1.857	1.899
neg_911	Elaidic Acid	反油酸	metab_5242	B(i)	-	-	HMDB0000573;MJDBOTE0000365	M-H	C18H34O2	9.8167	-	C01712	neg	Lipids	Fatty acids	-	-	Lipids and lipid-like molecules	Fatty Acyls	281.249	0.160511	62.4	0	2.36757	112-79-8	Fatty acids and conjugates	2.669	2.718	2.67	2.793	2.852	2.747	2.74	2.68	2.604	2.798	2.669	2.716	2.624	2.585	2.639	2.749	2.916	2.394	2.763	2.725	2.857
pos_3249	Palatinose	帕拉金糖	metab_2500	B(ii)	-	-	HMDB0256083	M+ACN+Na	C12H22O11	3.3132	-	C01742	pos	Carbohydrates	Oligosaccharides	-	-	Organic oxygen compounds	Organooxygen compounds	406.135	0.16208	0	59.4	9.19242	13718-94-0	Carbohydrates and carbohydrate conjugates	1.983	0.5015	2.291	1.361	0.421	2.185	2.045	2.27	2.454	1.428	2.04	2.44	2.126	1.428	1.622	2.252	1.369	2.556	2.012	2.11	2.153
pos_3260	Ribostamycin	核糖霉素	metab_2513	B(ii)	map01110;map00524	Biosynthesis of secondary metabolites;Neomycin, kanamycin and gentamicin biosynthesis	HMDB0257216	M+H-2H2O	C17H34N4O10	3.3017	次级代谢产物的生物合成;新霉素、卡那霉素和庆大霉素生物合成	C01759	pos	-	-	Metabolism;Metabolism	Global and overview maps;Biosynthesis of other secondary metabolites	Organic oxygen compounds	Organooxygen compounds	419.218	0.0957981	0	64.3	9.43353	25546-65-0	Carbohydrates and carbohydrate conjugates	1.778	2.126	1.252	1.476	1.665	1.83	0.6351	0.4485	1.308	1.815	1.976	1.527	1.932	2.193	2.059	1.808	2.024	1.052	1.719	1.754	1.8
pos_530	Xanthosine	黄嘌呤	metab_3207	B(ii)	map01100;map01110;map00230;map00232;map02010;map01232	Metabolic pathways;Biosynthesis of secondary metabolites;Purine metabolism;Caffeine metabolism;ABC transporters;Nucleotide metabolism	PW_C000203;HMDB0000299;MJDBOTE0001063	M+H-2H2O, M+CH3OH+H	C10H12N4O6	4.7893	代谢途径;次级代谢产物的生物合成;嘌呤代谢;咖啡因代谢;ABC转运蛋白;-	C01762	pos	-	-	Metabolism;Metabolism;Metabolism;Metabolism;Environmental Information Processing;Metabolism	Global and overview maps;Global and overview maps;Nucleotide metabolism;Biosynthesis of other secondary metabolites;Membrane transport;Global and overview maps	Nucleosides, nucleotides, and analogues	Purine nucleosides	249.062	0.0858582	0	63.4	0.119267	146-80-5	Not Available	2.471	2.562	2.318	2.505	2.452	2.535	2.279	2.261	2.526	2.313	2.683	2.373	2.46	2.699	2.437	2.617	2.509	2.255	2.447	2.5	2.52
neg_587	Kaltostat	-	metab_4884	B(ii)	map01100;map00051	Metabolic pathways;Fructose and mannose metabolism	HMDB0029940;HMDB0253761	M+FA-H	C14H22O13	5.3284	代谢途径;果糖和甘露糖代谢	C01768	neg	-	-	Metabolism;Metabolism	Global and overview maps;Carbohydrate metabolism	Organic oxygen compounds	Organooxygen compounds	443.1	0.0856586	0	37.4	-9.77841	9005-32-7	Carbohydrates and carbohydrate conjugates	1.583	0.9949	0.5666	0.8709	0.7166	1.107	0.61	0.6093	1.616	0.5927	1.511	0.5924	0.8944	1.644	0.9787	1.577	0.5859	0.567	1.315	1.322	1.257
pos_1099	4-Deoxytetronic acid	4 -脱氧四烯酸	metab_111	B(i)	-	-	HMDB0000549;HMDB0000498	M+H	C4H6O2	1.1092	-	C01770	pos	-	-	-	-	Organoheterocyclic compounds	Lactones	87.0438	0.0692308	90.9	0	-2.65244	759-06-8;96-48-0	Gamma butyrolactones	2.343	2.172	2.46	2.03	2.443	2.355	2.388	2.341	2.643	2.159	2.859	2.599	2.743	2.642	2.72	2.633	2.664	2.191	2.506	2.56	2.513
pos_406	Gamma-Butyrolactone	-	metab_3069	B(ii)	-	-	HMDB0000549	M+H-H2O, M+Na	C4H6O2	2.6237	-	C01770	pos	-	-	-	-	Organoheterocyclic compounds	Lactones	69.033	0.0488391	0	64.3	-5.3451	96-48-0	Gamma butyrolactones	1.498	0.8227	1.894	1.447	1.683	2.115	2.103	1.936	2.05	1.935	1.857	1.871	1.638	1.483	1.753	2.098	1.996	2.409	1.888	1.927	1.895
pos_3359	Glucomannan	葡甘聚糖	metab_2622	B(ii)	-	-	HMDB0252767	M+NH4	C24H42O21	2.6012	-	C01810	pos	-	-	-	-	Organic oxygen compounds	Organooxygen compounds	684.258	0.102949	0	72.1	3.77319	-	Carbohydrates and carbohydrate conjugates	2.861	2.098	3.257	2.923	2.861	3.178	3.486	3.435	3.27	3.325	3.178	3.423	3.188	2.778	3.121	3.287	3.2	3.59	3.115	3.205	3.161
pos_1397	Taxiphyllin	茶碱	metab_442	B(ii)	-	-	HMDB0030704	M+ACN+H	C14H17NO7	5.3111	-	C01855	pos	-	-	-	-	Organic oxygen compounds	Organooxygen compounds	353.134	0.254809	0	48.9	-2.26789	21401-21-8	Carbohydrates and carbohydrate conjugates	2.229	2.167	2.102	2.041	1.904	2.134	1.925	2.369	2.356	2.035	2.171	2.085	1.742	1.993	1.878	2.082	2.051	2.125	1.936	2.118	2.159
pos_1091	Pyroglutamic Acid	焦谷氨酸	metab_103	B(i)	map01100;map00480	Metabolic pathways;Glutathione metabolism	HMDB0000267;PW_C000182;MJDBOTE0000549	M+H	C5H7NO3	1.0865	代谢途径;谷胱甘肽代谢	C01879	pos	Peptides	Amino acids	Metabolism;Metabolism	Global and overview maps;Metabolism of other amino acids	Organic acids and derivatives	Carboxylic acids and derivatives	130.049	0.116255	85.1	0	-3.95966	98-79-3	Amino acids, peptides, and analogues	3.777	3.961	3.888	3.771	3.936	4.095	3.719	3.669	3.839	3.716	4.199	3.921	4.29	4.011	4.044	3.915	3.913	3.644	3.88	3.958	3.979
pos_2335	Gentamicin C	庆大霉素C	metab_1485	B(ii)	-	-	HMDB0252688	2M+ACN+Na	C19H39N5O7	9.041	-	C01918	pos	Antibiotics	Aminoglycosides	-	-	Organic oxygen compounds	Organooxygen compounds	962.581	0.215478	0	49.1	-5.09431	11097-82-8	Carbohydrates and carbohydrate conjugates	2.596	2.981	1.823	2.212	2.14	2.228	1.973	1.283	2.842	2.179	2.932	1.461	0.8859	2.44	2.531	2.684	2.35	1.651	2.474	2.311	2.332
neg_277	Maltohexaose	麦芽六糖	metab_4541	B(ii)	-	-	HMDB0012253	M+Cl, M+FA-H	C36H62O31	2.5896	-	C01936	neg	-	-	-	-	Organic oxygen compounds	Organooxygen compounds	1035.33	0.0736949	0	40	4.91016	34620-77-4	Carbohydrates and carbohydrate conjugates	3.131	2.655	3.69	3.318	3.373	3.766	3.998	3.81	3.733	3.656	3.451	3.732	3.27	2.912	3.24	3.799	3.741	4.116	3.687	3.655	3.622
neg_1332	Nocardicin A	诺卡菌素A	metab_4097	B(ii)	map01100;map01110;map00261	Metabolic pathways;Biosynthesis of secondary metabolites;Monobactam biosynthesis	HMDB0255683	M+FA-H	C23H24N4O9	4.6476	代谢途径;次级代谢产物的生物合成;单巴坦生物合成	C01941	neg	Antibiotics	beta-Lactams	Metabolism;Metabolism;Metabolism	Global and overview maps;Global and overview maps;Biosynthesis of other secondary metabolites	Organoheterocyclic compounds	Lactams	545.152	0.0628779	0	47.5	-0.679892	39391-39-4	Beta lactams	3.248	2.92	2.867	3.426	3.225	3.499	2.931	2.879	3.267	2.916	3.463	2.68	2.78	3.053	3.002	3.165	3.084	2.924	3.184	3.136	3.14
neg_6	Cellotetraose	-	metab_4898	B(i)	-	-	-	M+Cl, M+FA-H, M+K-2H, M-H	C24H42O21	1.2513	-	C02013	neg	-	-	-	-	-	-	701.194	0.0942471	45.1	0	4.16492	38819-01-1	-	3.346	2.655	3.922	3.46	3.639	3.814	4.097	4.063	3.87	3.924	3.761	4.142	3.601	3.249	3.768	3.969	3.889	4.156	3.857	3.801	3.779
pos_1780	Cyclopentanol	环戊醇	metab_868	B(ii)	-	-	HMDB0302463	M+ACN+H	C5H10O	9.3192	-	C02020	pos	-	-	-	-	Organic oxygen compounds	Organooxygen compounds	128.106	0.0989077	0	65	-7.79891	96-41-3	Alcohols and polyols	2.381	2.564	2.661	2.773	2.611	2.496	2.679	2.459	2.303	2.556	2.607	2.544	2.743	2.669	2.791	2.552	2.793	2.524	2.577	2.501	2.579
pos_23	Maltotetraose	麦芽四糖	metab_1445	B(i)	-	-	HMDB0001296;MJDBOTE0000277	M+Na, M+K, 2M+3H2O+2H, M+H-H2O, M+H+Na	C24H42O21	1.2476	-	C02052	pos	-	-	-	-	Organic oxygen compounds	Organooxygen compounds	705.187	0.134842	44.8	0	3.55464	34612-38-9	Carbohydrates and carbohydrate conjugates	5.264	4.911	5.49	5.142	5.096	5.597	5.742	5.756	5.696	5.656	5.569	5.707	5.261	5.107	5.406	5.574	5.555	5.91	5.459	5.575	5.551
neg_1518	Sedoheptulose	景天庚酮糖	metab_5347	B(ii)	map01100;map00710	Metabolic pathways;Carbon fixation in photosynthetic organisms	HMDB0003219	M-H2O-H	C7H14O7	1.2073	代谢途径;光合生物的固碳作用	C02076	neg	Carbohydrates	Monosaccharides	Metabolism;Metabolism	Global and overview maps;Energy metabolism	Organic oxygen compounds	Organooxygen compounds	191.057	0.165856	0	38	3.33942	470-46-2;3019-74-7	Carbohydrates and carbohydrate conjugates	2.767	2.722	2.67	2.702	2.914	2.947	2.704	2.761	2.853	2.91	2.901	2.722	2.939	2.978	2.943	2.897	3.036	2.78	2.857	2.86	2.726
neg_1461	Methylmalonic Acid	甲基丙二酸	metab_4239	B(i)	map00240;map01100;map00640;map00280	Pyrimidine metabolism;Metabolic pathways;Propanoate metabolism;Valine, leucine and isoleucine degradation	LMFA01170118;HMDB0000202;PW_C000130	M-H	C4H6O4	2.6999	嘧啶代谢;代谢途径;丙酸代谢;缬氨酸、亮氨酸和异亮氨酸降解	C02170	neg	-	-	Metabolism;Metabolism;Metabolism;Metabolism	Nucleotide metabolism;Global and overview maps;Carbohydrate metabolism;Amino acid metabolism	Organic acids and derivatives	Carboxylic acids and derivatives	117.02	0.10107	35.6	0	3.26355	516-05-2	Dicarboxylic acids and derivatives	2.333	2.022	2.643	2.401	2.333	2.365	2.156	2.539	2.258	2.464	2.36	2.522	2.426	2.509	2.292	2.359	2.575	2.305	2.398	2.334	2.42
neg_1524	2-Aminoacrylic acid	2 -氨基丙烯酸	metab_4306	B(ii)	map01100;map00270	Metabolic pathways;Cysteine and methionine metabolism	PW_C001938;HMDB0003609	M+FA-H	C3H5NO2	1.0422	代谢途径;半胱氨酸和蛋氨酸代谢	C02218	neg	-	-	Metabolism;Metabolism	Global and overview maps;Amino acid metabolism	Organic acids and derivatives	Carboxylic acids and derivatives	132.03	0.171315	0	77.7	-2.82328	1948-56-7;28453-71-6	Amino acids, peptides, and analogues	1.987	1.717	2.602	2.526	2.429	2.242	2.44	2.284	2.099	2.184	2.247	2.542	2.786	2.441	2.449	2.528	2.482	2.341	2.33	2.321	2.19
pos_3304	D-Galactosamine	D-氨基半乳糖	metab_2562	B(i)	map01100;map00052	Metabolic pathways;Galactose metabolism	MJDBOTE0000404	M+H	C6H13NO5	3.1437	代谢途径;半乳糖代谢	C02262	pos	Carbohydrates	Monosaccharides	Metabolism;Metabolism	Global and overview maps;Carbohydrate metabolism	-	-	180.087	0.113599	31.1	0	3.29407	7535-00-4	-	2.096	2.157	2.103	2.209	2.033	1.924	2.299	2.274	2.268	2.218	2.286	2.318	2.201	2.325	2.309	2.204	2.015	2.134	2.139	2.185	2.237
pos_1312	Isocoumarin	异香豆精	metab_349	B(ii)	-	-	HMDB0253625;HMDB0038510	M+CH3OH+H	C9H6O2	4.286	-	C02381	pos	-	-	-	-	Phenylpropanoids and polyketides	Isocoumarins and derivatives	179.07	0.0594749	0	44.8	0.15812	13410-15-6	Not Available	2.801	2.519	2.615	2.612	2.571	2.701	2.753	2.658	2.881	2.85	2.794	2.72	2.644	2.702	2.796	2.787	2.755	2.613	2.707	2.738	2.759
pos_3293	2-Cyclohexen-1-one	2-环己烯酮	metab_2549	B(ii)	-	-	HMDB0245089	M+H-H2O	C6H8O	3.1999	-	C02395	pos	-	-	-	-	Organic oxygen compounds	Organooxygen compounds	79.0537	0.118786	0	40.3	-5.35298	930-68-7	Carbonyl compounds	1.707	1.794	1.766	1.705	1.725	1.831	1.764	1.609	1.805	1.864	1.862	1.782	1.948	1.967	1.901	1.737	1.828	1.629	1.745	1.847	1.804
neg_708	1-Methyladenosine	1-甲基腺苷	metab_5017	B(ii)	-	-	HMDB0243935;HMDB0003331	M-H	C11H15N5O4	6.5698	-	C02494	neg	-	-	-	-	Nucleosides, nucleotides, and analogues	Purine nucleosides	280.106	0.0416001	0	30.8	3.49398	15763-06-1	Not Available	2.05	2.078	1.989	1.785	2.319	1.898	1.085	1.144	2.291	2.227	2.175	1.037	1.973	1.994	2.22	2.271	1.847	1.006	2.172	2.15	2.186
neg_1280	Kievitone hydrate	水合凯维酮	metab_4039	B(ii)	-	-	HMDB0038111	M-H2O-H	C20H22O7	5.0156	-	C02549	neg	-	-	-	-	Phenylpropanoids and polyketides	Isoflavonoids	355.117	0.0672756	0	43.8	-3.99653	62682-11-5	Isoflavans	2.812	2.955	2.56	2.586	2.676	2.827	2.884	2.802	2.891	2.737	2.66	2.757	2.284	2.716	2.879	2.775	2.936	2.718	2.826	2.833	2.778
neg_1328	3-Feruloylquinic acid	3-阿魏酰奎宁酸	metab_4092	B(ii)	-	-	HMDB0030669	2M+FA-H	C17H20O9	4.6698	-	C02572	neg	-	-	-	-	Organic oxygen compounds	Organooxygen compounds	781.221	0.182459	0	31.2	1.68738	62929-69-5	Alcohols and polyols	2.799	2.713	1.809	1.991	2.124	2.41	2.18	0.8881	2.162	1.444	2.075	1.489	1.416	1.692	2.113	2.116	1.845	1.379	2.275	2.218	2.115
pos_1857	3-Methyl-1-butylamine	3 -甲基- 1 -丁胺	metab_953	B(ii)	-	-	HMDB0031659	M+H	C5H13N	11.0218	-	C02640	pos	-	-	-	-	Organic nitrogen compounds	Organonitrogen compounds	88.1115	0.0838069	0	33.6	-6.24104	107-85-7	Amines	4.381	4.403	4.465	4.435	4.471	4.512	4.4	4.403	4.273	4.398	4.326	4.412	4.471	4.403	4.386	4.329	4.413	4.314	4.418	4.392	4.345
neg_351	4-Hydroxy-3-methoxycinnamaldehyde	4 -羟基- 3 -甲氧基肉桂醛	metab_4624	B(i)	map01100;map00940;map01110	Metabolic pathways;Phenylpropanoid biosynthesis;Biosynthesis of secondary metabolites	HMDB0141782	M-H, 2M-H	C10H10O3	4.5253	代谢途径;苯丙烷生物合成;次级代谢产物的生物合成	C02666	neg	-	-	Metabolism;Metabolism;Metabolism	Global and overview maps;Biosynthesis of other secondary metabolites;Global and overview maps	Benzenoids	Phenols	355.116	0.0456986	81.3	0	-7.31155	20649-42-7;458-36-6	Methoxyphenols	3.059	2.817	2.981	2.958	2.882	2.995	3.078	3.087	3.197	3.232	3.035	3.124	2.875	2.948	2.98	3.036	3.121	3.039	3.069	3.064	3.032
neg_1313	Acetyl-DL-Leucine	乙酰- Dl -亮氨酸	metab_4076	B(i)	-	-	HMDB0011756	M-H	C8H15NO3	4.7923	-	C02710	neg	-	-	-	-	Organic acids and derivatives	Carboxylic acids and derivatives	172.098	0.0666701	80.8	0	3.28825	1188-21-2	Amino acids, peptides, and analogues	3.089	3.2	2.78	2.93	2.95	2.863	2.841	2.965	3.049	3.015	3.213	2.956	2.926	3.081	2.964	3.119	3.157	2.871	3.071	3.04	3.098
pos_2271	PS(18:3(9Z,12Z,15Z)/14:0)	-	metab_1414	B(ii)	map01100;map00564;map01110;map00260	Metabolic pathways;Glycerophospholipid metabolism;Biosynthesis of secondary metabolites;Glycine, serine and threonine metabolism	LMGP03010399;PW_C007934;HMDB0012407	M+ACN+H	C38H68NO10P	9.239	代谢途径;甘油磷脂代谢;次级代谢产物的生物合成;甘氨酸、丝氨酸和苏氨酸代谢	C02737	pos	Lipids	Phospholipids	Metabolism;Metabolism;Metabolism;Metabolism	Global and overview maps;Lipid metabolism;Global and overview maps;Amino acid metabolism	Lipids and lipid-like molecules	Glycerophospholipids	771.491	0.0727335	0	65.6	-1.47309	-	Glycerophosphoserines	2.387	2.41	2.276	2.289	2.25	2.437	2.363	2.334	2.305	2.44	2.223	2.32	2.438	2.396	2.359	2.264	2.387	2.202	2.31	2.37	2.358
pos_2289	PS(20:4(8Z,11Z,14Z,17Z)/18:0)	-	metab_1433	B(ii)	map01100;map00564;map01110;map00260	Metabolic pathways;Glycerophospholipid metabolism;Biosynthesis of secondary metabolites;Glycine, serine and threonine metabolism	HMDB0112659;PW_C061078	M+H	C44H78NO10P	9.2037	代谢途径;甘油磷脂代谢;次级代谢产物的生物合成;甘氨酸、丝氨酸和苏氨酸代谢	C02737	pos	Lipids	Phospholipids	Metabolism;Metabolism;Metabolism;Metabolism	Global and overview maps;Lipid metabolism;Global and overview maps;Amino acid metabolism	Lipids and lipid-like molecules	Glycerophospholipids	812.548	0.171841	0	69.4	5.64521	-	Glycerophosphoserines	2.276	2.349	0.6056	1.808	1.767	1.866	1.53	0.3798	2.308	1.938	2.283	0.413	0.6173	2.002	2.121	2.04	1.986	0.9276	1.999	1.87	1.885
pos_2416	PS(24:1(15Z)/15:0)	-	metab_1575	B(ii)	map01100;map00564;map01110;map00260	Metabolic pathways;Glycerophospholipid metabolism;Biosynthesis of secondary metabolites;Glycine, serine and threonine metabolism	PW_C061354;HMDB0112912	M+Na	C45H86NO10P	8.7152	代谢途径;甘油磷脂代谢;次级代谢产物的生物合成;甘氨酸、丝氨酸和苏氨酸代谢	C02737	pos	Lipids	Phospholipids	Metabolism;Metabolism;Metabolism;Metabolism	Global and overview maps;Lipid metabolism;Global and overview maps;Amino acid metabolism	Lipids and lipid-like molecules	Glycerophospholipids	854.585	0.0587855	0	34.6	-3.28278	-	Glycerophosphoserines	1.832	1.348	1.957	2.057	2.189	2.149	2.059	1.968	1.701	1.987	1.907	1.917	2.009	2.245	1.985	1.826	2.024	1.912	1.98	2.016	1.968
pos_2423	PS(16:0/22:2(13Z,16Z))	-	metab_1583	B(ii)	map01100;map00564;map01110;map00260	Metabolic pathways;Glycerophospholipid metabolism;Biosynthesis of secondary metabolites;Glycine, serine and threonine metabolism	LMGP03010200;PW_C060751;HMDB0112351	M+2Na-H	C44H82NO10P	8.6807	代谢途径;甘油磷脂代谢;次级代谢产物的生物合成;甘氨酸、丝氨酸和苏氨酸代谢	C02737	pos	Lipids	Phospholipids	Metabolism;Metabolism;Metabolism;Metabolism	Global and overview maps;Lipid metabolism;Global and overview maps;Amino acid metabolism	Lipids and lipid-like molecules	Glycerophospholipids	860.544	0.210353	0	30.4	5.90951	-	Glycerophosphoserines	1.779	1.177	1.225	1.572	1.063	1.432	1.538	1.264	1.666	1.688	1.627	1.347	1.419	1.699	1.741	1.515	1.561	1.143	1.682	1.606	1.5
pos_1712	PS(22:2(13Z,16Z)/15:0)	-	metab_793	B(ii)	map01100;map00564;map01110;map00260	Metabolic pathways;Glycerophospholipid metabolism;Biosynthesis of secondary metabolites;Glycine, serine and threonine metabolism	LMGP03010760;PW_C061191;HMDB0112763	M+H-2H2O	C43H80NO10P	8.7382	代谢途径;甘油磷脂代谢;次级代谢产物的生物合成;甘氨酸、丝氨酸和苏氨酸代谢	C02737	pos	Lipids	Phospholipids	Metabolism;Metabolism;Metabolism;Metabolism	Global and overview maps;Lipid metabolism;Global and overview maps;Amino acid metabolism	Lipids and lipid-like molecules	Glycerophospholipids	766.534	0.0908086	0	33	-4.85592	-	Glycerophosphoserines	2.9	2.861	2.98	3.042	3.078	3.06	2.938	2.926	2.819	3.04	2.949	2.989	3.073	3.071	3.02	2.929	3.005	2.94	2.937	2.967	3.014
pos_3397	Enol-phenylpyruvate	烯醇-苯丙酮酸	metab_2664	B(ii)	map01100;map00360	Metabolic pathways;Phenylalanine metabolism	HMDB0012225	M+H	C9H8O3	1.4538	代谢途径;苯丙氨酸代谢	C02763	pos	-	-	Metabolism;Metabolism	Global and overview maps;Amino acid metabolism	Benzenoids	Benzene and substituted derivatives	165.055	0.19847	0	33.1	1.23136	5801-57-0	Phenylpyruvic acid derivatives	1.547	1.318	1.965	1.486	1.385	1.428	1.526	1.639	1.882	1.778	1.994	1.665	1.946	1.557	1.95	1.819	1.394	1.368	1.889	1.745	1.753
pos_1441	Protochlorophyllide	原叶绿素酸脂	metab_492	B(ii)	map01100;map01110;map00860	Metabolic pathways;Biosynthesis of secondary metabolites;Porphyrin metabolism	HMDB0031148	M+H-2H2O	C35H32MgN4O5	5.9517	代谢途径;次级代谢产物的生物合成;卟啉与叶绿素代谢	C02880	pos	-	-	Metabolism;Metabolism;Metabolism	Global and overview maps;Global and overview maps;Metabolism of cofactors and vitamins	Organoheterocyclic compounds	Tetrapyrroles and derivatives	577.203	0.106372	0	99	-9.07624	14751-08-7;20369-67-9;708964-46-9	Metallotetrapyrroles	2.882	2.189	3.093	3.003	2.77	3.1	2.898	3.034	3.171	3.071	3.102	3.037	2.988	2.841	2.807	3.143	3.02	3.127	2.979	3.07	3.05
pos_3541	L-3-Aminodihydro-2(3H)-furanone	L-3-氨基二氢-2（3H）-呋喃酮	metab_2825	B(ii)	-	-	HMDB0029387	M+H-H2O	C4H7NO2	1.0865	-	C02926	pos	-	-	-	-	Organic acids and derivatives	Carboxylic acids and derivatives	84.0442	0.0633379	0	52.4	-2.30509	-	Amino acids, peptides, and analogues	2.996	3.143	3.096	2.983	3.119	3.258	2.97	2.855	3.077	2.931	3.425	3.234	3.469	3.276	3.271	3.124	3.141	2.813	3.106	3.154	3.155
neg_1219	(E)-indol-3-ylacetaldoxime	（E） -吲哚-3-基乙醛肟	metab_3971	B(ii)	map01100;map01210;map01110;map00380;map00966	Metabolic pathways;2-Oxocarboxylic acid metabolism;Biosynthesis of secondary metabolites;Tryptophan metabolism;Glucosinolate biosynthesis	HMDB0303989	2M-H	C10H10N2O	5.5304	代谢途径;2-氧羰基酸代谢;次级代谢产物的生物合成;色氨酸代谢;硫代葡萄糖苷生物合成	C02937	neg	-	-	Metabolism;Metabolism;Metabolism;Metabolism;Metabolism	Global and overview maps;Global and overview maps;Global and overview maps;Amino acid metabolism;Biosynthesis of other secondary metabolites	Organoheterocyclic compounds	Indoles and derivatives	347.151	0.055923	0	34.1	-0.874712	-	Indoles	1.833	2.685	0.5592	2.303	0.9412	2.095	0.6023	0.6016	0.6858	0.5851	0.5664	0.5848	0.5023	1.155	0.5709	0.6067	2.325	1.368	1.861	1.813	1.84
pos_1634	Palmitoylcarnitine	棕榈酰肉碱	metab_706	B(ii)	map01212;map00071	Fatty acid metabolism;Fatty acid degradation	LMFA07070004;HMDB0000222;HMDB0240783	M+H-2H2O	C23H45NO4	7.7108	脂肪酸代谢;脂肪酸降解	C02990	pos	-	-	Metabolism;Metabolism	Global and overview maps;Lipid metabolism	Lipids and lipid-like molecules	Fatty Acyls	364.32	0.0480679	0	39	-1.37331	2364-67-2	Fatty acid esters	1.08	0.4955	1.072	1.048	0.8434	0.6001	0.9664	0.8535	2.062	0.4643	1.765	0.7073	0.891	1.396	1.4	1.537	1.625	0.9572	1.387	1.377	1.415
pos_1402	15-Hydroxynorandrostene-3,17-dione glucuronide	15 -羟基降雄烯- 3，17 -二酮葡萄糖醛酸苷	metab_449	B(ii)	map01100;map00040;map00053;map01240	Metabolic pathways;Pentose and glucuronate interconversions;Ascorbate and aldarate metabolism;Biosynthesis of cofactors	HMDB0010353;LMST05010033	M+2Na-H	C24H32O9	5.4277	代谢途径;戊糖和葡萄糖醛酸的相互转化;抗坏血酸和醛酸代谢;-	C03033	pos	-	-	Metabolism;Metabolism;Metabolism;Metabolism	Global and overview maps;Carbohydrate metabolism;Carbohydrate metabolism;Global and overview maps	Lipids and lipid-like molecules	Steroids and steroid derivatives	509.18	0.104406	0	51.6	9.01186	131749-23-0	Steroidal glycosides	2.673	2.329	2.457	2.412	2.495	2.638	2.642	2.637	2.804	2.653	2.892	2.631	2.571	2.615	2.767	3.046	2.785	2.695	2.686	2.743	2.777
pos_2724	4-Methylumbelliferone	4-甲基伞形花序酮	metab_1917	B(ii)	-	-	HMDB0059622;MJDBOTE0001043	M+CH3OH+H	C10H8O3	6.5715	-	C03081	pos	-	-	-	-	Phenylpropanoids and polyketides	Coumarins and derivatives	209.08	0.133722	0	90.1	-3.79298	90-33-5	Hydroxycoumarins	1.824	1.113	1.892	1.601	1.621	1.813	1.593	1.828	1.94	1.897	1.843	1.875	1.676	1.573	1.588	1.891	1.942	1.986	1.741	1.848	1.842
pos_2549	(Z)-4-Hydroxy-6-dodecenoic acid lactone	（Z） -4-羟基-6-十二碳烯酸内酯	metab_1722	B(ii)	-	-	LMFA07040067;HMDB0032331	M+H-2H2O	C12H20O2	7.6991	-	C03107	pos	-	-	-	-	Organoheterocyclic compounds	Lactones	161.131	0.0955752	0	45.6	-5.69807	18679-18-0	Gamma butyrolactones	0.7934	1.216	0.481	1.063	1.124	0.9857	0.4185	0.4009	1.885	0.4845	1.42	0.4352	0.9468	1.407	0.5206	0.7475	0.9559	0.4271	1.151	1.177	1.226
pos_2738	Nicotinamide riboside	烟酰胺核糖	metab_1932	B(ii)	map01100;map00760	Metabolic pathways;Nicotinate and nicotinamide metabolism	PW_C000681;HMDB0000855	2M+Na	C11H15N2O5+	6.5004	代谢途径;烟酸和烟酰胺代谢	C03150	pos	-	-	Metabolism;Metabolism	Global and overview maps;Metabolism of cofactors and vitamins	Organic oxygen compounds	Organooxygen compounds	533.182	0.0426466	0	57.9	-6.03822	1341-23-7	Carbohydrates and carbohydrate conjugates	3.678	3.219	3.379	3.536	3.622	3.534	3.475	3.548	3.989	3.713	3.855	3.68	3.461	3.392	3.597	3.767	3.653	3.591	3.64	3.663	3.677
pos_3047	Trypanothione disulfide	锥虫硫酮二硫化物	metab_2276	B(ii)	map01100;map00480	Metabolic pathways;Glutathione metabolism	HMDB0060521	M+Na	C27H47N9O10S2	4.9511	代谢途径;谷胱甘肽代谢	C03170	pos	-	-	Metabolism;Metabolism	Global and overview maps;Metabolism of other amino acids	Organic acids and derivatives	Carboxylic acids and derivatives	744.278	0.208188	0	31	-0.382802	96304-42-6	Amino acids, peptides, and analogues	2.089	2.453	1.127	1.524	0.2619	2.646	1.387	2.169	2.464	0.5399	2.285	0.2624	0.2578	1.687	1.128	1.73	2.178	2.231	1.83	1.992	2.001
pos_2736	Lumazine	卢马津	metab_1930	B(ii)	-	-	HMDB0254198	2M+Na	C6H4N4O2	6.512	-	C03212	pos	-	-	-	-	Organoheterocyclic compounds	Pteridines and derivatives	351.054	0.0458225	0	32.2	-6.19188	487-21-8	Not Available	2.766	2.875	2.515	2.79	2.819	2.627	2.492	2.289	2.614	2.441	2.771	2.291	2.778	2.915	2.854	2.923	2.779	2.429	2.7	2.664	2.669
pos_3378	5-phosphonooxy-L-lysine	5-磷酸氧基-L-赖氨酸	metab_2643	B(ii)	map01100;map00310	Metabolic pathways;Lysine degradation	HMDB0059600	M+ACN+H	C6H15N2O6P	2.0052	代谢途径;赖氨酸降解	C03366	pos	-	-	Metabolism;Metabolism	Global and overview maps;Amino acid metabolism	Organic acids and derivatives	Carboxylic acids and derivatives	284.1	0.298027	0	32.5	-2.23791	-	Amino acids, peptides, and analogues	2.458	2.916	1.901	2.801	1.152	0.4547	0.2604	0.2476	0.3245	0.3094	0.3253	2.053	2.341	1.752	1.254	0.4748	1.757	0.791	2.091	2.093	1.843
neg_189	N-Glycolylneuraminic acid	N-羟乙酰神经氨酸	metab_4443	B(ii)	map00520	Amino sugar and nucleotide sugar metabolism	HMDB0062502;HMDB0242723;HMDB0000833	M-H, M+Na-2H	C11H19NO10	6.5588	氨基糖和核苷酸糖代谢	C03410	neg	Carbohydrates	Monosaccharides	Metabolism	Carbohydrate metabolism	Organic oxygen compounds	Organooxygen compounds	324.091	0.0439805	0	31.3	-7.8601	1113-83-3	Carbohydrates and carbohydrate conjugates	2.747	2.648	2.718	2.678	2.972	2.768	2.509	2.523	3.039	2.894	2.976	2.495	2.685	2.773	2.83	3.027	2.646	2.494	2.797	2.819	2.835
pos_3299	O-Beta-D-Glucosylzeatin	O - β - D -葡萄糖基玉米素	metab_2555	B(i)	map01110;map00908	Biosynthesis of secondary metabolites;Zeatin biosynthesis	HMDB0302640	M+H	C16H23N5O6	3.1774	次级代谢产物的生物合成;玉米素生物合成	C03423	pos	-	-	Metabolism;Metabolism	Global and overview maps;Metabolism of terpenoids and polyketides	Lipids and lipid-like molecules	Fatty Acyls	382.172	0.0704119	54	0	-0.388043	-	Fatty acyl glycosides	2.646	2.4	2.825	2.644	2.716	2.718	2.693	2.495	2.926	2.568	3.028	2.714	2.983	2.879	2.747	2.962	2.631	2.495	2.7	2.758	2.748
pos_2105	20-Hydroxy-leukotriene E4	20 -羟基-白三烯E4	metab_1230	B(ii)	map00590	Arachidonic acid metabolism	LMFA03020062;HMDB0012639;LMFA03020025	M+CH3OH+H	C23H37NO6S	10.1665	花生四烯酸代谢	C03577	pos	-	-	Metabolism	Lipid metabolism	Lipids and lipid-like molecules	Fatty Acyls	488.271	0.28537	0	91	6.93124	111844-33-8	Eicosanoids	3.099	3.128	3.076	3.262	3.184	2.954	2.787	2.845	2.778	2.92	2.888	2.952	2.928	2.953	2.924	2.923	2.816	2.889	3.147	2.943	2.948
pos_284	1-Kestose	1-凯斯托斯	metab_2045	B(i)	-	-	HMDB0011729;MJDBOTE0001231	M+H+Na, M+Na, M+K	C18H32O16	1.2362	-	C03661	pos	-	-	-	-	Organic oxygen compounds	Organooxygen compounds	543.133	0.17068	82.4	0	1.24129	470-69-9	Carbohydrates and carbohydrate conjugates	5.526	4.984	5.644	5.274	5.29	5.648	5.891	5.933	5.843	5.754	5.832	5.904	5.569	5.536	5.756	5.815	5.662	5.959	5.612	5.752	5.742
pos_3239	Planteose	车前糖	metab_2489	B(ii)	-	-	HMDB0302793	M+CH3OH+H	C18H32O16	3.371	-	C03848	pos	-	-	-	-	Organic oxygen compounds	Organooxygen compounds	537.204	0.129747	0	41.3	2.81665	470-57-5	Carbohydrates and carbohydrate conjugates	2.484	1.829	2.646	1.891	1.771	1.962	2.467	2.534	2.756	2.205	2.139	2.66	2.047	2.153	2.193	2.295	1.927	2.597	2.419	2.416	2.316
neg_1120	Dihydro-O-methylsterigmatocystin	二氢邻甲基杂色曲霉素	metab_3863	B(ii)	map01100;map01110	Metabolic pathways;Biosynthesis of secondary metabolites	HMDB0030591	M+FA-H	C19H16O6	6.0694	代谢途径;次级代谢产物的生物合成	C03944	neg	-	-	Metabolism;Metabolism	Global and overview maps;Global and overview maps	Organoheterocyclic compounds	Benzopyrans	385.094	0.174109	0	30.1	2.40573	21793-91-9	1-benzopyrans	1.431	0.316	1.132	1.405	1.06	1.171	1.45	1.611	1.541	1.838	1.409	1.561	0.29	0.6867	1.162	1.39	1.598	1.675	1.454	1.316	1.36
pos_2744	D-Pantothenoyl-L-cysteine	D -泛酰基- L -半胱氨酸	metab_1939	B(ii)	map00770	Pantothenate and CoA biosynthesis	PW_C002959;HMDB0006834	M+H	C12H22N2O6S	6.4765	泛酸和辅酶A生物合成	C04079	pos	-	-	Metabolism	Metabolism of cofactors and vitamins	Organic acids and derivatives	Peptidomimetics	323.128	0.0380772	0	38.3	3.5085	-	Hybrid peptides	2.461	1.958	2.021	2.051	2.23	2.167	2.336	2.335	2.789	2.581	2.605	2.437	1.908	2.162	2.427	2.603	2.329	2.308	2.419	2.442	2.451
neg_781	1-Linoleoyl-sn-Glycero-3-Phosphocholine	1-亚油酸基-sn-甘油-3-磷酸胆碱	metab_5098	B(i)	-	-	HMDB0010386;LMGP01050137	M+FA-H	C26H50NO7P	8.7186	-	C04100	neg	-	-	-	-	Lipids and lipid-like molecules	Glycerophospholipids	564.332	0.0771179	57.4	0	1.66734	22252-07-9	Glycerophosphocholines	3.671	3.695	3.62	3.356	3.314	3.296	3.587	3.498	3.576	3.739	3.619	3.332	2.979	3.569	3.542	3.629	3.526	3.501	3.647	3.583	3.603
pos_2459	Octopine	章鱼碱	metab_1622	B(ii)	map01100;map02010;map00330	Metabolic pathways;ABC transporters;Arginine and proline metabolism	HMDB0255912	M+2Na-H	C9H18N4O4	8.4749	代谢途径;ABC转运蛋白;精氨酸和脯氨酸代谢	C04137	pos	-	-	Metabolism;Environmental Information Processing;Metabolism	Global and overview maps;Membrane transport;Amino acid metabolism	Organic acids and derivatives	Carboxylic acids and derivatives	291.102	0.0819024	0	48.6	-7.54199	34522-32-2	Amino acids, peptides, and analogues	1.794	1.758	0.4935	0.7489	0.8792	0.5849	1.932	1.662	1.246	1.411	1.148	0.5402	0.5329	1.509	1.786	2.004	1.668	0.8239	1.486	1.549	1.498
pos_3305	Vomifoliol	催吐叶醇	metab_2563	B(ii)	-	-	HMDB0303570	M+Na	C13H20O3	3.1324	-	C04166	pos	-	-	-	-	Lipids and lipid-like molecules	Prenol lipids	247.129	0.181113	0	35.8	-4.94059	-	Sesquiterpenoids	1.858	2.122	2.056	1.884	1.909	1.892	2.03	1.834	1.979	2.415	2.239	1.829	2.095	2.021	2.118	1.943	2.082	1.691	2.039	2.01	1.884
pos_2325	1-Palmitoylphosphatidylcholine	1 -棕榈酰磷脂酰胆碱	metab_1474	B(ii)	map00564	Glycerophospholipid metabolism	HMDB0256091;HMDB0010382	M+H	C24H50NO7P	9.064	甘油磷脂代谢	C04230	pos	Lipids	Phospholipids	Metabolism	Lipid metabolism	Lipids and lipid-like molecules	Glycerophospholipids	496.34	0.00709025	0	88	1.17673	17364-16-8	Glycerophosphocholines	4.575	4.563	4.156	4.044	4.05	4.241	4.362	4.261	4.908	4.09	4.909	4.264	4.044	4.653	4.655	4.647	4.469	4.227	4.511	4.505	4.509
neg_795	LysoPC(18:1(11Z)/0:0)	-	metab_5113	B(ii)	map00564	Glycerophospholipid metabolism	HMDB0010385	M+FA-H	C26H52NO7P	9.1009	甘油磷脂代谢	C04230	neg	Lipids	Phospholipids	Metabolism	Lipid metabolism	Lipids and lipid-like molecules	Glycerophospholipids	566.346	0.208808	0	71.5	-1.13523	-	Glycerophosphocholines	1.937	2.395	1.333	1.303	0.9757	1.518	1.565	1.254	1.975	2.321	1.998	1.017	0.9139	1.098	1.568	1.842	1.646	1.225	1.882	1.899	2.038
neg_977	LysoPC(18:3(6Z,9Z,12Z)/0:0)	-	metab_5312	B(ii)	map00564	Glycerophospholipid metabolism	HMDB0010387	M+FA-H	C26H48NO7P	8.3956	甘油磷脂代谢	C04230	neg	Lipids	Phospholipids	Metabolism	Lipid metabolism	Lipids and lipid-like molecules	Glycerophospholipids	562.316	0.0541239	0	63.1	2.26201	-	Glycerophosphocholines	2.744	2.984	2.682	2.489	2.538	2.578	2.509	2.383	2.62	3.051	2.76	2.341	2.169	2.778	2.759	2.623	2.691	2.375	2.757	2.735	2.782
neg_1413	5-Fluorodeoxyuridine monophosphate	5 -氟脱氧尿苷一磷酸	metab_4187	B(ii)	-	-	HMDB0060394	M+Na-2H	C9H12FN2O8P	3.6169	-	C04242	neg	-	-	-	-	Nucleosides, nucleotides, and analogues	Pyrimidine nucleotides	347.009	0.109068	0	44.9	8.25957	-	Pyrimidine deoxyribonucleotides	2.623	2.408	2.617	2.629	2.378	2.541	2.598	2.562	2.547	2.64	2.449	2.733	2.447	2.71	2.596	2.69	2.731	2.551	2.54	2.629	2.562
pos_2413	PE-NMe2(14:0/16:0)	PE-NMe2（14:0/16:0）	metab_1572	B(ii)	map01100;map00564;map01110	Metabolic pathways;Glycerophospholipid metabolism;Biosynthesis of secondary metabolites	HMDB0113845;PW_C057641	M+H-H2O	C37H74NO8P	8.7382	代谢途径;甘油磷脂代谢;次级代谢产物的生物合成	C04308	pos	-	-	Metabolism;Metabolism;Metabolism	Global and overview maps;Lipid metabolism;Global and overview maps	Lipids and lipid-like molecules	Glycerophospholipids	674.508	0.0416074	0	31.4	-5.96203	-	Glycerophosphoethanolamines	2.333	2.481	2.027	2.608	2.829	2.626	2.548	1.503	1.793	2.46	2.418	1.955	2.483	2.893	2.378	2.184	2.385	1.577	2.405	2.44	2.419
pos_1159	Dimethylethanolamine	二甲基乙醇胺	metab_178	B(ii)	map01100;map00564;map01110	Metabolic pathways;Glycerophospholipid metabolism;Biosynthesis of secondary metabolites	HMDB0032231	M+H-H2O	C4H11NO	1.4303	代谢途径;甘油磷脂代谢;次级代谢产物的生物合成	C04308	pos	-	-	Metabolism;Metabolism;Metabolism	Global and overview maps;Lipid metabolism;Global and overview maps	Organic nitrogen compounds	Organonitrogen compounds	72.0805	0.0685417	0	36.7	-3.36446	108-01-0	Amines	2.78	2.808	2.924	2.734	2.479	2.83	2.724	2.833	2.965	2.786	3.225	2.925	3.135	3.076	3.17	3.055	2.925	2.567	3.001	2.985	2.943
pos_2968	6,7-Dimethyl-8-(1-D-ribityl)lumazine	6,7-二甲基-8-（1-D-核糖基）芦嗪	metab_2187	B(ii)	map01100;map01110;map00740;map01240	Metabolic pathways;Biosynthesis of secondary metabolites;Riboflavin metabolism;Biosynthesis of cofactors	PW_C001973;HMDB0003826	M+H-H2O	C13H18N4O6	5.4749	代谢途径;次级代谢产物的生物合成;核黄素代谢;-	C04332	pos	-	-	Metabolism;Metabolism;Metabolism;Metabolism	Global and overview maps;Global and overview maps;Metabolism of cofactors and vitamins;Global and overview maps	Organoheterocyclic compounds	Pteridines and derivatives	309.116	0.082334	0	89.2	-9.85281	2535-20-8;5118-16-1	Not Available	1.804	1.729	1.62	1.551	1.729	1.923	2.117	1.76	1.946	1.907	1.972	1.647	1.64	1.832	1.898	1.987	1.836	1.677	1.927	1.857	1.885
pos_1637	4-[2,2'-Bithiophen-5-yl]-3-butyn-1-ol	4-[2,2'-双噻吩-5-基]-3-丁基-1-醇	metab_709	B(ii)	-	-	HMDB0034453	M+H	C12H10OS2	7.7678	-	C04486	pos	-	-	-	-	Organoheterocyclic compounds	Bi- and oligothiophenes	235.025	0.0382757	0	33.4	-0.205827	1137-87-7	Not Available	3.083	2.695	2.464	2.952	3.066	2.794	3.211	2.938	3.638	3.204	3.304	2.722	2.676	2.665	2.727	3.096	3.269	2.995	3.079	3.11	3.106
neg_1042	4-Hydroxycinnamoylagmatine	4 -羟基桂皮酰马钱子碱	metab_3776	B(ii)	map01100;map01110;map00999	Metabolic pathways;Biosynthesis of secondary metabolites;Biosynthesis of various plant secondary metabolites	HMDB0033460	M+K-2H	C14H20N4O2	6.7484	代谢途径;次级代谢产物的生物合成;多种次生代谢产物的生物合成Ⅰ	C04498	neg	-	-	Metabolism;Metabolism;Metabolism	Global and overview maps;Global and overview maps;Biosynthesis of other secondary metabolites	Phenylpropanoids and polyketides	Cinnamic acids and derivatives	313.109	0.0285818	0	31.6	5.63657	7295-86-5	Hydroxycinnamic acids and derivatives	2.542	1.589	2.906	2.252	2.364	2.679	2.657	3.023	3.146	2.696	3.111	3.206	2.367	1.312	1.944	3.03	2.998	3.036	2.834	2.81	2.826
pos_3489	Phosphoribosylformylglycinamidine	磷酸核糖甲酰甘氨酸	metab_2766	B(ii)	map01100;map01110;map00230	Metabolic pathways;Biosynthesis of secondary metabolites;Purine metabolism	HMDB0000999;HMDB0002305	M+H	C8H16N3O8P	1.202	代谢途径;次级代谢产物的生物合成;嘌呤代谢	C04640	pos	-	-	Metabolism;Metabolism;Metabolism	Global and overview maps;Global and overview maps;Nucleotide metabolism	Organic oxygen compounds	Organooxygen compounds	314.077	0.230382	0	92.1	6.31355	37721-04-3;6157-85-3	Carbohydrates and carbohydrate conjugates	0.8887	1.807	0.9809	1.457	1.553	1.763	0.3064	0.292	0.3777	0.3611	1.729	0.3201	1.967	1.089	1.609	0.5446	1.573	0.3134	1.145	1.19	1.32
neg_770	13(S)-HpODE	13（S）-HpODE	metab_5086	B(i)	map01100;map00591	Metabolic pathways;Linoleic acid metabolism	HMDB0003871	M-H	C18H32O4	8.1476	代谢途径;亚油酸	C04717	neg	-	-	Metabolism;Metabolism	Global and overview maps;Lipid metabolism	Lipids and lipid-like molecules	Fatty Acyls	311.223	0.0149948	54.8	0	-0.241471	33964-75-9	Lineolic acids and derivatives	4.064	3.764	4.326	4.171	4.228	4.255	4.33	4.398	4.106	4.376	4.142	4.338	4.226	4.128	4.228	4.237	4.467	4.253	4.219	4.21	4.223
neg_1406	Phosphoribosyl formamidocarboxamide	磷酸核糖甲酰胺甲酰胺	metab_4179	B(ii)	map01100;map01110;map00230	Metabolic pathways;Biosynthesis of secondary metabolites;Purine metabolism	PW_C001111;HMDB0001439	M-H2O-H	C10H15N4O9P	3.7833	代谢途径;次级代谢产物的生物合成;嘌呤代谢	C04734	neg	-	-	Metabolism;Metabolism;Metabolism	Global and overview maps;Global and overview maps;Nucleotide metabolism	Nucleosides, nucleotides, and analogues	Imidazole ribonucleosides and ribonucleotides	347.043	0.0990963	0	58.7	8.38889	13018-54-7	1-ribosyl-imidazolecarboxamides	1.49	0.6096	1.54	2.144	2.253	2.337	1.479	1.115	2.122	0.6072	2.492	1.424	2.321	2.016	2.229	2.501	2.009	1.285	1.947	2.012	1.934
pos_3384	2,6-diamino-4-hydroxy-5-formamidopyrimidine	2，6 -二氨基- 4 -羟基- 5 -甲酰氨基嘧啶	metab_2650	B(ii)	-	-	HMDB0011657;HMDB0304046	M+H-H2O	C5H7N5O2	1.7812	-	C04744	pos	-	-	-	-	Organoheterocyclic compounds	Diazines	152.057	0.0920189	0	86.8	-0.14062	77440-13-2	Pyrimidines and pyrimidine derivatives	2.783	2.912	2.619	2.875	2.778	2.909	2.73	2.782	2.341	2.77	2.71	2.677	2.921	2.705	2.944	2.559	2.929	2.437	2.74	2.698	2.661
neg_1008	9S-hydroxy-11,15-dioxo-5Z,13E-prostadienoic acid	9S-羟基11，15 -二氧代- 5Z，13E -前列二烯酸	metab_3738	B(ii)	map00590	Arachidonic acid metabolism	HMDB0062297;LMFA03010206	M+FA-H	C20H30O5	7.2665	花生四烯酸代谢	C04758	neg	-	-	Metabolism	Lipid metabolism	Lipids and lipid-like molecules	Fatty Acyls	395.205	0.0382161	0	33.5	-7.00471	-	Eicosanoids	2.3	2.312	2.457	2.466	2.476	2.373	2.512	2.521	2.33	2.452	2.276	2.553	2.527	2.637	2.726	2.487	2.678	2.371	2.54	2.508	2.518
pos_3312	2'-O-Methyladenosine	2'-O-甲基腺苷	metab_2571	B(i)	-	-	HMDB0004326	M+H	C11H15N5O4	2.9974	-	C04779	pos	-	-	-	-	Nucleosides, nucleotides, and analogues	Purine nucleosides	282.12	0.187555	69.8	0	-0.247852	2140-79-6	Not Available	2.167	2.377	1.702	1.605	1.636	1.986	1.89	1.746	1.8	1.918	1.896	1.945	1.95	2.224	2.16	1.679	2.107	1.908	1.911	2.029	2.075
pos_1584	3-Oxo-2-(2-entenyl)cyclopentaneoctanoic acid	3-氧代-2-（2-戊烯基）环戊新辛酸	metab_650	B(ii)	map01100;map00592;map01110	Metabolic pathways;alpha-Linolenic acid metabolism;Biosynthesis of secondary metabolites	HMDB0301805	M+H-2H2O	C18H30O3	7.1588	代谢途径;α-亚麻酸代谢;次级代谢产物的生物合成	C04780	pos	-	-	Metabolism;Metabolism;Metabolism	Global and overview maps;Lipid metabolism;Global and overview maps	Lipids and lipid-like molecules	Fatty Acyls	259.206	0.228834	0	66.7	0.361412	204135-86-4	Eicosanoids	1.674	1.669	2.005	2.044	2.156	1.973	1.946	1.992	1.66	1.872	1.886	1.974	2.046	1.87	2.086	1.907	2.189	2.064	1.975	1.841	2.043
pos_2590	13(S)-Hydroperoxylinolenic acid	13（S）-氢过氧亚油酸	metab_1768	B(ii)	map01100;map00592;map01110	Metabolic pathways;alpha-Linolenic acid metabolism;Biosynthesis of secondary metabolites	HMDB0301803	M+H	C18H30O4	7.3673	代谢途径;α-亚麻酸代谢;次级代谢产物的生物合成	C04785	pos	-	-	Metabolism;Metabolism;Metabolism	Global and overview maps;Lipid metabolism;Global and overview maps	Lipids and lipid-like molecules	Fatty Acyls	311.222	0.0530096	0	55.6	2.33525	67597-26-6	Lineolic acids and derivatives	3.173	3.532	2.972	3.146	3.138	3.258	3.198	2.972	3.03	3.13	3.239	3.156	3.071	3.504	3.569	3.307	3.623	3.148	3.238	3.273	3.283
pos_2121	3-beta-Hydroxy-4-beta-methyl-5-alpha-cholest-7-ene-4-alpha-carboxylate	3-β-羟基-4-β-甲基-5-α-胆甾-7-烯-4-α-羧酸酯	metab_1248	B(ii)	-	-	HMDB0011662	M+H	C29H48O3	10.0991	-	C04840	pos	-	-	-	-	Lipids and lipid-like molecules	Steroids and steroid derivatives	445.37	0.145657	0	38.6	4.39192	-	Cholestane steroids	2.493	2.718	1.422	1.978	1.764	1.921	2.113	1.144	2.725	1.673	2.646	2.095	2.028	2.36	2.367	2.123	2.321	2.002	2.267	2.266	2.372
pos_3081	Protopine	普罗托品	metab_2314	B(ii)	map00950;map01100;map01110	Isoquinoline alkaloid biosynthesis;Metabolic pathways;Biosynthesis of secondary metabolites	HMDB0003920;MJDBOTE0000958	M+H-2H2O	C20H19NO5	4.7431	异喹啉生物碱生物合成;代谢途径;次级代谢产物的生物合成	C05189	pos	-	-	Metabolism;Metabolism;Metabolism	Biosynthesis of other secondary metabolites;Global and overview maps;Global and overview maps	Alkaloids and derivatives	Protopine alkaloids	318.116	0.167854	0	49.5	9.15544	130-86-9	Not Available	2.119	1.356	1.47	1.714	1.213	1.658	2.19	1.905	2.306	1.624	2.015	2.036	1.629	1.806	1.541	2.036	1.685	2.143	1.849	1.95	1.994
neg_1303	2-Amino-4-oxo-4-alpha-hydroxy-6-(erythro-1',2',3'-trihydroxypropyl)-5,6,7,8-tetrahydroxypterin	2-氨基-4-氧代-4-α-羟基-6-（红-1'，2'，3'-三羟丙基）-5,6,7,8-四羟基蝶呤	metab_4065	B(ii)	-	-	HMDB0012143	2M-H	C9H15N5O8	4.8704	-	C05252	neg	-	-	-	-	Organoheterocyclic compounds	Pteridines and derivatives	641.173	0.0934081	0	52.1	-5.31775	-	Pterins and derivatives	2.928	2.981	2.548	2.986	2.475	2.73	2.651	2.615	2.903	2.681	2.85	2.198	2.425	2.77	2.592	2.766	2.709	2.391	2.837	2.783	2.759
pos_1710	7a-Hydroxyandrost-4-ene-3,17-dione	7A -羟基雄甾- 4 -烯- 3，17 -二酮	metab_791	B(ii)	-	-	HMDB0006771	M+H	C19H26O3	8.7267	-	C05296	pos	-	-	-	-	Lipids and lipid-like molecules	Steroids and steroid derivatives	303.193	0.134037	0	39.1	-9.59646	62-84-0	Androstane steroids	1.833	1.736	1.498	1.463	1.633	1.694	2.007	0.3035	2.052	1.976	2.038	1.55	1.777	1.619	2.105	1.942	2.023	0.9668	1.859	1.766	1.876
neg_1289	(+)-Pinoresinol	（+）-松脂醇	metab_4048	B(i)	map01100;map01110;map00999	Metabolic pathways;Biosynthesis of secondary metabolites;Biosynthesis of various plant secondary metabolites	-	M-H	C20H22O6	4.9821	代谢途径;次级代谢产物的生物合成;多种次生代谢产物的生物合成Ⅰ	C05366	neg	-	-	Metabolism;Metabolism;Metabolism	Global and overview maps;Global and overview maps;Biosynthesis of other secondary metabolites	-	-	357.133	0.0211984	58.9	0	-2.80176	487-36-5	-	2.994	2.898	2.902	2.875	3.05	3.087	2.906	3.23	3.2	2.792	3.238	2.823	2.797	2.924	2.803	3.084	3.049	3.153	3.042	3.054	3.036
pos_3379	Nicotinic Acid	烟酸	metab_2644	B(i)	map01100;map00960;map01240;map01110;map00760	Metabolic pathways;Tropane, piperidine and pyridine alkaloid biosynthesis;Biosynthesis of cofactors;Biosynthesis of secondary metabolites;Nicotinate and nicotinamide metabolism	HMDB0003269;PW_C001145;HMDB0001488;MJDBOTE0000774	M+H	C6H5NO2	1.9999	代谢途径;托烷、哌啶和吡啶生物碱的生物合成;-;次级代谢产物的生物合成;烟酸和烟酰胺代谢	C05380;C00253	pos	-;Vitamins and cofactors	-;Vitamins	Metabolism;Metabolism;Metabolism;Metabolism;Metabolism	Global and overview maps;Biosynthesis of other secondary metabolites;Global and overview maps;Global and overview maps;Metabolism of cofactors and vitamins	Organic acids and derivatives	Carboxylic acids and derivatives	124.039	0.0935745	80.4	0	-1.98564	583-08-4;59-67-6	Amino acids, peptides, and analogues	3.738	3.569	3.751	4.016	3.865	3.883	3.869	3.951	3.805	4.015	3.852	3.9	4.063	3.826	4.017	3.833	3.889	3.758	3.775	3.851	3.791
neg_2	Epimelibiose	表甘露糖	metab_4455	B(ii)	map00052	Galactose metabolism	HMDB0006792;PW_C002930	M+K-2H, M+FA-H, 2M-H, M+Cl, M-H	C12H22O11	1.2073	半乳糖代谢	C05400	neg	-	-	Metabolism	Carbohydrate metabolism	Organic oxygen compounds	Organooxygen compounds	377.087	0.0258416	0	40.6	3.7455	140461-60-5;17296-19-4	Carbohydrates and carbohydrate conjugates	4.201	3.272	4.398	3.919	4.194	4.217	4.558	4.526	4.405	4.352	4.494	4.665	4.472	4.412	4.565	4.602	4.285	4.427	4.369	4.373	4.39
neg_1492	Dehydroascorbic acid	脱氢抗坏血酸	metab_5339	B(ii)	map01100;map00480;map00053	Metabolic pathways;Glutathione metabolism;Ascorbate and aldarate metabolism	PW_C000977;HMDB0001264	M-H	C6H6O6	2.2506	代谢途径;谷胱甘肽代谢;抗坏血酸和醛酸代谢	C05422	neg	-	-	Metabolism;Metabolism;Metabolism	Global and overview maps;Metabolism of other amino acids;Carbohydrate metabolism	Organoheterocyclic compounds	Lactones	173.01	0.297615	0	35.7	5.62243	490-83-5	Gamma butyrolactones	2.661	2.492	2.768	2.642	2.822	2.372	2.578	2.741	2.566	2.95	2.582	2.907	2.805	2.328	2.641	2.442	2.827	2.929	2.494	2.73	2.755
neg_794	Taurochenodesoxycholic acid	牛磺鹅脱氧胆酸	metab_5112	B(ii)	-	-	PW_C000759;HMDB0000951	M+Na-2H	C26H45NO6S	9.0789	-	C05465	neg	-	-	-	-	Lipids and lipid-like molecules	Steroids and steroid derivatives	520.267	0.13409	0	56	-9.27551	516-35-8	Bile acids, alcohols and derivatives	2.543	2.347	2.629	2.291	2.048	2.221	2.617	2.516	2.711	2.493	2.611	2.625	2.396	2.705	2.637	2.636	2.549	2.655	2.627	2.708	2.599
neg_804	Dihydrocortisol	二氢皮质醇	metab_5124	B(ii)	-	-	LMST02030204;PW_C001823;HMDB0003259	M-H2O-H	C21H32O5	9.3805	-	C05471	neg	-	-	-	-	Lipids and lipid-like molecules	Steroids and steroid derivatives	345.206	0.122362	0	48.8	-3.47753	1482-50-4	Hydroxysteroids	2.89	2.906	2.744	2.995	2.988	2.863	2.968	2.831	2.912	2.974	2.83	2.808	2.945	2.975	3.031	2.932	3.05	2.725	2.971	3.035	2.931
neg_982	11b-Hydroxyprogesterone	11b -羟孕酮	metab_5318	B(ii)	-	-	HMDB0304821;PW_C002030;HMDB0004031	M+FA-H	C20H28O4	8.1889	-	C05498	neg	-	-	-	-	Lipids and lipid-like molecules	Steroids and steroid derivatives	377.195	0.0661678	0	38.1	-5.8751	600-57-7	Androstane steroids	2.664	2.356	2.883	2.938	2.764	2.893	2.804	2.745	2.476	2.97	2.544	2.705	2.989	2.949	2.978	2.768	3.087	2.612	2.761	2.818	2.791
neg_399	Deoxyinosine	脱氧核苷	metab_4676	B(ii)	map01100;map02010;map01232;map00230	Metabolic pathways;ABC transporters;Nucleotide metabolism;Purine metabolism	HMDB0000071;PW_C000050;MJDBOTE0001081	2M+FA-H	C10H12N4O4	2.4958	代谢途径;ABC转运蛋白;-;嘌呤代谢	C05512	neg	-	-	Metabolism;Environmental Information Processing;Metabolism;Metabolism	Global and overview maps;Membrane transport;Global and overview maps;Nucleotide metabolism	Nucleosides, nucleotides, and analogues	Purine nucleosides	549.169	0.0467058	0	60.7	-2.08538	890-38-0	Purine 2''-deoxyribonucleosides	3.346	2.591	3.537	3.431	3.51	3.393	3.786	3.724	3.495	3.559	3.512	3.733	3.704	3.353	3.542	3.63	3.563	3.804	3.549	3.553	3.515
neg_440	Gentisate aldehyde	龙胆醛	metab_4723	B(ii)	map01100;map00350	Metabolic pathways;Tyrosine metabolism	HMDB0004062	2M+FA-H	C7H6O3	3.2742	代谢途径;酪氨酸代谢	C05585	neg	-	-	Metabolism;Metabolism	Global and overview maps;Amino acid metabolism	Organic oxygen compounds	Organooxygen compounds	321.063	0.0645852	0	48.7	3.63709	1194-98-5	Carbonyl compounds	2.559	2.246	2.324	2.591	2.554	2.372	2.334	1.998	2.428	2.321	2.658	2.184	2.708	2.776	2.666	2.581	2.52	1.946	2.48	2.428	2.439
neg_1455	N(2)-phenylacetyl-L-glutaminate	N（2）-苯乙酰基-L-谷氨酰胺	metab_4232	B(ii)	-	-	HMDB0062645	M+Cl	C13H16N2O4	3.0866	-	C05597	neg	-	-	-	-	Organic acids and derivatives	Carboxylic acids and derivatives	299.078	0.0159239	0	33.3	-7.73307	-	Amino acids, peptides, and analogues	2.258	2.49	2.368	2.64	2.467	2.531	2.325	2.562	2.322	2.529	2.272	2.661	2.433	2.487	2.22	2.142	2.465	2.619	2.479	2.479	2.491
neg_1300	N-Acetyl-D-phenylalanine	N -乙酰基- D -苯丙氨酸	metab_4062	B(i)	map01100;map00470	Metabolic pathways;D-Amino acid metabolism	-	M-H	C11H13NO3	4.8928	代谢途径;-	C05620	neg	-	-	Metabolism;Metabolism	Global and overview maps;Metabolism of other amino acids	-	-	206.084	0.0809112	88.6	0	6.48367	10172-89-1	-	2.56	2.209	2.565	2.555	2.446	2.585	2.538	2.6	2.64	2.627	2.615	2.523	2.491	2.521	2.529	2.657	2.514	2.652	2.583	2.527	2.594
neg_510	Formyl-5-hydroxykynurenamine	甲酰基- 5 -羟基犬尿氨酸	metab_4801	B(ii)	map00380	Tryptophan metabolism	HMDB0012948;PW_C008135	2M+FA-H	C10H12N2O3	4.5697	色氨酸代谢	C05647	neg	-	-	Metabolism	Amino acid metabolism	Organic oxygen compounds	Organooxygen compounds	461.166	0.163581	0	43.9	-4.09622	958733-17-0	Carbonyl compounds	2.286	1.418	2.209	2.285	2.009	2.363	2.22	2.187	2.243	1.8	2.304	2.181	2.024	2.078	2.046	2.204	2.129	2.226	2.2	2.093	2.074
pos_1090	Aminopropanol	氨丙醇	metab_102	B(ii)	-	-	HMDB0012136;HMDB0248330	M+H-H2O	C3H9NO	1.0865	-	C05771	pos	-	-	-	-	Organic nitrogen compounds	Organonitrogen compounds	58.065	0.121437	0	36.6	-1.25014	78-96-6	Amines	2.74	2.655	2.542	2.532	2.528	2.644	2.561	2.465	2.827	2.585	2.949	2.468	2.655	2.869	2.817	2.798	2.757	2.395	2.667	2.756	2.668
pos_2955	Stercobilin	尿胆素盐酸盐	metab_2173	B(ii)	map00860	Porphyrin metabolism	HMDB0240259	M+H	C33H46N4O6	5.5219	卟啉与叶绿素代谢	C05793	pos	-	-	Metabolism	Metabolism of cofactors and vitamins	Organoheterocyclic compounds	Tetrapyrroles and derivatives	595.35	0.0104936	0	44.2	1.46384	34217-90-8	Bilirubins	4.503	2.691	4.163	3.559	3.75	3.778	4.522	4.334	4.4	3.967	3.541	4.356	3.916	4.049	3.972	4.183	4.202	4.595	4.225	4.223	4.231
neg_606	3-Methyldioxyindole	3 -甲基二氧吲哚	metab_4906	B(ii)	map00380	Tryptophan metabolism	HMDB0004186	M-H2O-H	C9H9NO2	5.5416	色氨酸代谢	C05834	neg	-	-	Metabolism	Amino acid metabolism	Organoheterocyclic compounds	Indoles and derivatives	144.046	0.0676111	0	44.5	2.39038	3040-34-4	Indolines	2.606	2.477	2.156	2.586	2.497	2.224	2.559	1.92	2.555	2.764	2.648	2.185	2.279	2.754	2.704	2.665	2.62	1.878	2.573	2.569	2.62
pos_1209	Coumarinic acid	香豆酸	metab_234	B(ii)	map01110;map00999	Biosynthesis of secondary metabolites;Biosynthesis of various plant secondary metabolites	HMDB0041592;HMDB0304296	M+H	C9H8O3	2.6912	次级代谢产物的生物合成;多种次生代谢产物的生物合成Ⅰ	C05838	pos	-	-	Metabolism;Metabolism	Global and overview maps;Biosynthesis of other secondary metabolites	Phenylpropanoids and polyketides	Cinnamic acids and derivatives	165.055	0.0725867	0	37.7	-0.480364	495-79-4	Hydroxycinnamic acids and derivatives	2.857	2.454	3.313	2.827	3.019	3.118	3.051	2.99	3.243	3.071	3.401	3.116	3.281	3.04	3.215	3.182	2.875	3.008	3.064	3.126	3.106
neg_563	Nicotinic acid ribonucleoside	烟酸核糖核苷	metab_4858	B(ii)	map01100;map00760	Metabolic pathways;Nicotinate and nicotinamide metabolism	HMDB0006809	2M+FA-H	C11H14NO6+	5.0714	代谢途径;烟酸和烟酰胺代谢	C05841	neg	-	-	Metabolism;Metabolism	Global and overview maps;Metabolism of cofactors and vitamins	Organic oxygen compounds	Organooxygen compounds	557.16	0.0508041	0	42.9	-3.87938	4013-06-03	Carbohydrates and carbohydrate conjugates	1.895	1.339	1.683	1.534	1.521	1.701	1.469	1.142	1.748	1.353	1.97	1.194	1.287	1.616	1.385	1.706	1.412	1.215	1.688	1.657	1.647
pos_3313	Biotinyl-5'-AMP	生物素-5'-AMP	metab_2572	B(ii)	map01100;map00780	Metabolic pathways;Biotin metabolism	PW_C002092;HMDB0004220	M+H-2H2O	C20H28N7O9PS	2.9524	代谢途径;生物素代谢	C05921	pos	-	-	Metabolism;Metabolism	Global and overview maps;Metabolism of cofactors and vitamins	Nucleosides, nucleotides, and analogues	Purine nucleotides	538.129	0.0626965	0	34.8	3.4603	4130-20-5	Purine ribonucleotides	3.029	3.168	3.258	3.168	3.199	3.043	2.94	2.945	2.986	2.944	3.184	3.142	3.323	3.153	3.049	2.907	3.121	2.885	3.055	3.076	3.109
pos_1211	Neopterin	新蝶呤	metab_237	B(ii)	map00790	Folate biosynthesis	HMDB0000845;PW_C000673;HMDB0000877;HMDB0000727	2M+NH4	C9H11N5O4	2.6912	叶酸合成	C05926	pos	-	-	Metabolism	Metabolism of cofactors and vitamins	Organoheterocyclic compounds	Pteridines and derivatives	524.199	0.0346685	0	32.5	5.1764	2277-42-1;2009-64-5;10162-32-0	Pterins and derivatives	2.253	1.708	2.974	1.571	2.193	2.316	2.756	2.863	2.891	2.502	2.979	2.978	2.676	2.41	2.817	2.862	2.114	2.77	2.63	2.645	2.615
pos_3075	Panthenol	泛醇	metab_2307	B(ii)	map00770	Pantothenate and CoA biosynthesis	HMDB0304820;HMDB0004231;MJDBOTE0000360	M+H-2H2O	C9H19NO4	4.7893	泛酸和辅酶A生物合成	C05944	pos	-	-	Metabolism	Metabolism of cofactors and vitamins	Lipids and lipid-like molecules	Fatty Acyls	170.117	0.0731484	0	39.8	-0.818214	81-13-0	Fatty amides	2.588	2.303	1.689	2.204	2.555	2.022	2.375	2.177	2.344	1.801	2.191	2.675	2.542	2.267	2.339	1.608	2.088	2.631	2.306	2.357	2.366
neg_966	20-Cooh ltb4	-	metab_5301	B(ii)	map00590	Arachidonic acid metabolism	HMDB0245561;HMDB0006059	M-H2O-H	C21H32O6	8.6746	花生四烯酸代谢	C05950	neg	-	-	Metabolism	Lipid metabolism	Lipids and lipid-like molecules	Fatty Acyls	361.2	0.18248	0	30.6	-4.48696	80434-82-8	Fatty acids and conjugates	2.641	2.523	2.405	2.725	2.567	2.602	2.621	2.529	2.502	2.539	2.501	2.433	2.538	2.605	2.638	2.531	2.843	2.434	2.58	2.655	2.496
neg_679	Leukotriene D4	白三烯D4	metab_4984	B(i)	map00590;map01100	Arachidonic acid metabolism;Metabolic pathways	LMFA03020006;PW_C001775;HMDB0003080;HMDB0244369	M-H	C25H40N2O6S	6.1916	花生四烯酸代谢;代谢途径	C05951	neg	Lipids	Eicosanoids	Metabolism;Metabolism	Lipid metabolism;Global and overview maps	Lipids and lipid-like molecules	Fatty Acyls	495.257	0.0425699	80	0	6.85343	73836-78-9	Eicosanoids	2.382	2.655	1.071	2.183	1.799	2.27	1.746	0.8044	1.267	0.7857	1.138	0.7854	1.179	2.462	2.399	1.305	1.989	0.7568	2.102	2.134	2.103
neg_771	(15S)-Prostaglandin A2	（15S）-前列腺素A2	metab_5087	B(ii)	map00590;map01100	Arachidonic acid metabolism;Metabolic pathways	HMDB0242292;HMDB0002752	M+FA-H	C20H30O4	8.1611	花生四烯酸代谢;代谢途径	C05953	neg	Lipids	Eicosanoids	Metabolism;Metabolism	Lipid metabolism;Global and overview maps	Lipids and lipid-like molecules	Fatty Acyls	379.211	0.0273424	0	30.6	-4.19605	13345-50-1	Eicosanoids	3.052	2.589	3.393	3.179	3.219	3.279	3.371	3.439	3.044	3.361	3.087	3.351	3.267	3.087	3.211	3.218	3.425	3.308	3.241	3.236	3.219
pos_2723	Prostaglandin B2	前列腺素B2	metab_1916	B(ii)	map00590;map01100	Arachidonic acid metabolism;Metabolic pathways	LMFA03010018;PW_C002099;HMDB0004236	M+NH4	C20H30O4	6.5715	花生四烯酸代谢;代谢途径	C05954	pos	Lipids	Eicosanoids	Metabolism;Metabolism	Lipid metabolism;Global and overview maps	Lipids and lipid-like molecules	Fatty Acyls	352.248	0.0807755	0	37.3	-0.739059	13367-85-6	Eicosanoids	1.761	1.339	2.095	2.11	2.161	1.718	1.621	1.978	1.475	1.926	1.761	2.131	2.243	2.009	1.886	1.757	2.147	1.372	1.828	1.857	1.788
pos_3063	Salidroside	红景天苷	metab_2294	B(ii)	map01100;map00350	Metabolic pathways;Tyrosine metabolism	HMDB0257463;MJDBOTE0000899	M+H-2H2O	C14H20O7	4.8584	代谢途径;酪氨酸代谢	C06046	pos	-	-	Metabolism;Metabolism	Global and overview maps;Amino acid metabolism	Organic oxygen compounds	Organooxygen compounds	265.107	0.149248	0	75	0.917615	10338-51-9	Carbohydrates and carbohydrate conjugates	2.121	2.261	2.374	1.733	1.774	1.951	1.649	2.104	2.304	1.69	2.064	1.947	1.445	1.689	1.544	2.151	2.048	2.69	2.174	2.076	2.058
neg_653	Deoxyloganin	脱氧甘氨酸	metab_4956	B(ii)	map01100;map01110;map00902	Metabolic pathways;Biosynthesis of secondary metabolites;Monoterpenoid biosynthesis	LMPR0102070005;HMDB0251007	M+Na-2H	C17H26O9	5.8676	代谢途径;次级代谢产物的生物合成;单萜生物合成	C06071	neg	-	-	Metabolism;Metabolism;Metabolism	Global and overview maps;Global and overview maps;Metabolism of terpenoids and polyketides	Lipids and lipid-like molecules	Prenol lipids	395.134	0.0445129	0	47.5	4.93634	26660-57-1	Terpene glycosides	2.253	3.172	0.7247	2.139	1.944	1.72	1.634	1.308	1.828	1.993	1.569	1.107	0.6604	1.888	1.848	1.868	2.178	0.7251	2.378	2.348	2.342
pos_960	R-limonene	-	metab_3684	B(ii)	map01100;map01110;map00902	Metabolic pathways;Biosynthesis of secondary metabolites;Monoterpenoid biosynthesis	HMDB0257077;HMDB0003375	M+H-2H2O, M+H	C10H16O3	10.2333	代谢途径;次级代谢产物的生物合成;单萜生物合成	C06099	pos	-	-	Metabolism;Metabolism;Metabolism	Global and overview maps;Global and overview maps;Metabolism of terpenoids and polyketides	Organoheterocyclic compounds	Oxepanes	185.117	0.0390874	0	30.6	-2.31542	5989-27-5	Not Available	4.613	4.626	4.715	4.699	4.731	4.838	4.716	4.726	4.548	4.73	4.606	4.731	4.814	4.716	4.667	4.62	4.709	4.619	4.668	4.658	4.635
pos_1585	Codeinone	可待因酮	metab_651	B(ii)	map00950;map01100;map01110	Isoquinoline alkaloid biosynthesis;Metabolic pathways;Biosynthesis of secondary metabolites	HMDB0304293	M+K	C18H20NO3+	7.1703	异喹啉生物碱生物合成;代谢途径;次级代谢产物的生物合成	C06171	pos	-	-	Metabolism;Metabolism;Metabolism	Biosynthesis of other secondary metabolites;Global and overview maps;Global and overview maps	Alkaloids and derivatives	Morphinans	337.107	0.113255	0	59.2	0.0530698	467-13-0	Not Available	2.345	1.664	1.667	2.114	2.228	1.947	2.127	2.259	2.611	2.43	2.505	2.426	1.919	1.925	2.122	2.399	2.266	2.294	2.284	2.343	2.383
pos_1908	1-Methylpyrrolinium	1-甲基吡咯啉	metab_1010	B(ii)	map01100;map00960;map01110;map00760	Metabolic pathways;Tropane, piperidine and pyridine alkaloid biosynthesis;Biosynthesis of secondary metabolites;Nicotinate and nicotinamide metabolism	HMDB0060253	M+	C5H10N+	11.7711	代谢途径;托烷、哌啶和吡啶生物碱的生物合成;次级代谢产物的生物合成;烟酸和烟酰胺代谢	C06178	pos	-	-	Metabolism;Metabolism;Metabolism;Metabolism	Global and overview maps;Biosynthesis of other secondary metabolites;Global and overview maps;Metabolism of cofactors and vitamins	Organoheterocyclic compounds	Pyrrolines	84.0815	0.137729	0	45	1.84153	16032-02-3	Not Available	3.449	3.472	3.519	3.57	3.546	3.601	3.508	3.526	3.293	3.449	3.424	3.419	3.522	3.445	3.51	3.451	3.418	3.418	3.488	3.486	3.379
pos_1146	1-Piperideine	1-哌啶	metab_164	B(ii)	map01100;map00960;map01110	Metabolic pathways;Tropane, piperidine and pyridine alkaloid biosynthesis;Biosynthesis of secondary metabolites	HMDB0243998	M+H	C5H9N	1.3041	代谢途径;托烷、哌啶和吡啶生物碱的生物合成;次级代谢产物的生物合成	C06181	pos	-	-	Metabolism;Metabolism;Metabolism	Global and overview maps;Biosynthesis of other secondary metabolites;Global and overview maps	Not Available	Not Available	84.0803	0.140738	0	49.3	-6.16725	-	Not Available	1.845	1.811	1.965	2.053	1.939	1.913	1.896	1.919	1.882	2.029	2.002	1.856	2.082	2.095	2.006	1.942	1.965	1.994	2.046	2.023	2.135
neg_1154	(+/-)-Pelletierine	-	metab_3899	B(ii)	map01100;map00960;map01110	Metabolic pathways;Tropane, piperidine and pyridine alkaloid biosynthesis;Biosynthesis of secondary metabolites	HMDB0030325	M+K-2H	C8H15NO	5.8562	代谢途径;托烷、哌啶和吡啶生物碱的生物合成;次级代谢产物的生物合成	C06182	neg	-	-	Metabolism;Metabolism;Metabolism	Global and overview maps;Biosynthesis of other secondary metabolites;Global and overview maps	Organoheterocyclic compounds	Piperidines	178.064	0.188175	0	64.7	-0.621125	539-00-4	Not Available	2.046	1.059	1.432	1.267	1.075	2.003	2.673	2.414	2.052	2.383	1.836	2.097	1.131	2.317	2.197	2.058	2.202	2.484	2.227	2.219	2.358
pos_3215	(-)-Slaframine	（-）-斯拉夫胺	metab_2463	B(ii)	map00960;map01110	Tropane, piperidine and pyridine alkaloid biosynthesis;Biosynthesis of secondary metabolites	HMDB0243523	M+CH3OH+H	C10H18N2O2	3.5173	托烷、哌啶和吡啶生物碱的生物合成;次级代谢产物的生物合成	C06185	pos	-	-	Metabolism;Metabolism	Biosynthesis of other secondary metabolites;Global and overview maps	Organoheterocyclic compounds	Indolizidines	231.171	0.0943614	0	43.3	5.74132	20084-93-9	Not Available	2.876	3.062	2.911	2.635	2.794	2.797	2.899	2.872	2.815	2.943	2.939	3.055	2.966	3.029	3.112	2.9	2.95	2.845	2.955	3.012	2.934
pos_3066	DIMP	-	metab_2297	B(ii)	map01232;map00230	Nucleotide metabolism;Purine metabolism	HMDB0251357;HMDB0006555	M+H	C10H13N4O7P	4.8471	-;嘌呤代谢	C06196	pos	-	-	Metabolism;Metabolism	Global and overview maps;Nucleotide metabolism	Organic acids and derivatives	Organic phosphonic acids and derivatives	333.061	0.11589	0	59.3	5.5631	3393-18-8	Phosphonic acid diesters	1.998	0.9529	2.646	0.8306	0.8453	0.8995	0.8234	2.693	3.088	1.657	1.302	2.592	0.8374	0.9444	0.9243	0.9103	0.9066	2.818	2.163	2.255	2.18
pos_416	Salicylaldehyde	水杨醛	metab_3080	B(i)	map01100	Metabolic pathways	HMDB0034170	M+H, 2M+Na	C7H6O2	2.7026	代谢途径	C06202	pos	-	-	Metabolism	Global and overview maps	Organic oxygen compounds	Organooxygen compounds	123.044	0.178522	68.7	0	-1.28898	1990-02-08	Carbonyl compounds	2.306	2.197	2.719	2.227	2.449	2.582	2.472	2.452	2.679	2.517	2.826	2.558	2.699	2.53	2.639	2.628	2.378	2.447	2.453	2.609	2.565
pos_3356	Cellopentaose	纤维五糖	metab_2619	B(ii)	-	-	HMDB0249794;HMDB0012254	M+K	C30H52O26	2.6126	-	C06218	pos	-	-	-	-	Organic oxygen compounds	Organooxygen compounds	867.242	0.210548	0	69	4.57731	34620-76-3	Carbohydrates and carbohydrate conjugates	4.428	3.926	4.383	4.154	3.812	4.477	4.677	4.397	4.673	4.603	4.529	4.601	4.164	4.241	4.356	4.491	4.522	4.822	4.356	4.531	4.521
neg_462	D-Threo biopterin	-	metab_4747	B(ii)	map01100;map00790;map01240	Metabolic pathways;Folate biosynthesis;Biosynthesis of cofactors	HMDB0251210	2M-H	C9H11N5O3	3.7393	代谢途径;叶酸合成;-	C06313	neg	-	-	Metabolism;Metabolism;Metabolism	Global and overview maps;Metabolism of cofactors and vitamins;Global and overview maps	Organoheterocyclic compounds	Pteridines and derivatives	473.165	0.0161801	0	30.7	0.266127	-	Pterins and derivatives	1.266	0.4008	1.717	2.338	2.337	2.867	1.949	1.616	2.199	1.405	2.649	1.707	2.109	2.161	2.089	2.601	1.84	2.034	2.2	2.188	2.187
pos_1410	Lacto-N-tetraose	乳糖-N-四糖	metab_458	B(ii)	-	-	HMDB0006566	M+ACN+H	C26H45NO21	5.5457	-	C06371	pos	Carbohydrates	Oligosaccharides	-	-	Organic oxygen compounds	Organooxygen compounds	749.277	0.0941917	0	49.7	-7.4918	7578-24-7	Carbohydrates and carbohydrate conjugates	2.593	1.996	1.844	1.587	1.387	1.996	2.188	1.738	2.419	1.933	2.544	1.986	1.479	2.265	2.127	2.42	1.984	2.156	2.203	2.279	2.219
pos_2013	D-(+)-Cellobiose	D-（+）-纤维二糖	metab_1128	B(i)	-	-	HMDB0000055	M+Na	C12H22O11	11.2656	-	C06422	pos	-	-	-	-	Organic oxygen compounds	Organooxygen compounds	365.105	0.240946	95.6	0	0.145977	528-50-7	Carbohydrates and carbohydrate conjugates	1.743	1.318	1.754	1.493	1.648	1.081	1.481	1.722	1.91	1.835	1.875	1.857	1.816	1.754	1.9	1.884	1.756	1.933	1.557	1.715	1.767
pos_1474	Caprylic acid	辛酸	metab_528	B(ii)	map01100;map00785;map00061;map01240	Metabolic pathways;Lipoic acid metabolism;Fatty acid biosynthesis;Biosynthesis of cofactors	HMDB0000482;PW_C000366;HMDB0304443;HMDB0303345;LMFA01010008	M+H-2H2O	C8H16O2	6.1194	代谢途径;硫辛酸代谢;脂肪酸生物合成;-	C06423	pos	Organic acids;Lipids	Carboxylic acids;Fatty acids	Metabolism;Metabolism;Metabolism;Metabolism	Global and overview maps;Metabolism of cofactors and vitamins;Lipid metabolism;Global and overview maps	Lipids and lipid-like molecules	Fatty Acyls	109.101	0.147433	0	36.9	-2.99485	124-07-2;74-81-7;124-07-2	Fatty acids and conjugates	3.123	3.532	2.622	2.846	2.855	2.72	2.685	2.514	2.995	3.071	2.865	2.761	2.9	3.17	3.018	2.896	3.05	2.638	2.941	3.039	3.068
pos_1658	Arachidic acid	花生酸	metab_732	B(ii)	map01040	Biosynthesis of unsaturated fatty acids	LMFA01010020;HMDB0002212	M+NH4	C20H40O2	7.9734	不饱和脂肪酸的生物合成	C06425	pos	Lipids	Fatty acids	Metabolism	Lipid metabolism	Lipids and lipid-like molecules	Fatty Acyls	330.336	0.0251906	0	30.2	-0.73977	506-30-9	Fatty acids and conjugates	3.646	3.804	3.428	3.864	3.947	3.872	3.677	3.148	3.906	3.983	4.014	3.736	3.909	4.285	3.949	3.876	3.77	3.682	3.836	3.85	3.857
pos_1781	Linolenic Acid	亚麻酸	metab_869	B(i)	map01100;map00592;map01110;map01040	Metabolic pathways;alpha-Linolenic acid metabolism;Biosynthesis of secondary metabolites;Biosynthesis of unsaturated fatty acids	HMDB0001388	M+CH3OH+H	C18H30O2	9.3414	代谢途径;α-亚麻酸代谢;次级代谢产物的生物合成;不饱和脂肪酸的生物合成	C06427	pos	Lipids	Fatty acids	Metabolism;Metabolism;Metabolism;Metabolism	Global and overview maps;Lipid metabolism;Global and overview maps;Lipid metabolism	Lipids and lipid-like molecules	Fatty Acyls	311.258	0.0594621	45.6	0	-0.877504	463-40-1	Lineolic acids and derivatives	2.434	3.088	1.444	2.329	2.584	2.737	1.918	1.467	2.523	2.485	2.768	1.648	2.251	2.569	2.625	2.281	2.6	1.026	2.467	2.516	2.48
pos_1378	Bialaphos	双丙氨膦	metab_421	B(ii)	map01110;map00440	Biosynthesis of secondary metabolites;Phosphonate and phosphinate metabolism	HMDB0249177	M+	C11H22N3O6P	5.0553	次级代谢产物的生物合成;膦酸盐和膦酸盐代谢	C06457	pos	-	-	Metabolism;Metabolism	Global and overview maps;Metabolism of other amino acids	Organic acids and derivatives	Carboxylic acids and derivatives	323.127	0.119837	0	74.4	8.65912	35597-43-4	Amino acids, peptides, and analogues	2.313	2.424	1.852	1.933	2.146	2.298	2.046	2.141	2.439	1.907	2.475	1.886	2.035	2.117	2.103	2.276	2.22	2.155	2.132	2.199	2.236
neg_1212	Cob(I)yrinate a,c diamide	钴（I）吡啶a，c二酰胺	metab_3964	B(ii)	map01100;map00860	Metabolic pathways;Porphyrin metabolism	HMDB0006904	M-H	C45H61CoN6O12	5.5529	代谢途径;卟啉与叶绿素代谢	C06505	neg	-	-	Metabolism;Metabolism	Global and overview maps;Metabolism of cofactors and vitamins	Organoheterocyclic compounds	Tetrapyrroles and derivatives	935.358	0.0940903	0	48.1	-2.54596	-	Corrinoids	3.47	3.842	2.383	3.004	3.014	3.051	2.589	2.221	2.849	2.608	2.877	2.392	2.678	3.407	3.289	3.032	3.134	2.164	3.187	3.129	3.11
pos_1520	4-ethylamino-6-isopropylamino-1,3,5-triazin-2-ol	4-乙基氨基-6-异丙基氨基-1,3,5-三嗪-2-醇	metab_580	B(ii)	map01100	Metabolic pathways	HMDB0062766	M+ACN+H	C8H15N5O	6.5715	代谢途径	C06552	pos	-	-	Metabolism	Global and overview maps	Organoheterocyclic compounds	Triazines	239.163	0.0965295	0	53.4	5.56014	2163-68-0	1,3,5-triazines	1.808	2.05	1.903	1.928	1.999	2.192	2.064	2.065	1.673	2.162	2.041	2.107	2.363	2.342	2.489	2.316	2.373	2.002	2.056	2.125	2.134
neg_1011	Tetracycline	四环素	metab_3742	B(ii)	map01100;map01110	Metabolic pathways;Biosynthesis of secondary metabolites	PW_C009228;HMDB0014897;HMDB0246415	M+FA-H	C22H24N2O8	7.2111	代谢途径;次级代谢产物的生物合成	C06570	neg	Antibiotics	Polyketides and nonribosomal peptides	Metabolism;Metabolism	Global and overview maps;Global and overview maps	Phenylpropanoids and polyketides	Tetracyclines	489.155	0.149879	0	47.7	8.8801	60-54-8	Not Available	2.76	2.26	2.204	2.604	2.237	2.261	2.78	2.68	2.787	2.865	2.607	2.791	1.949	2.235	2.685	2.775	2.74	2.554	2.685	2.678	2.564
pos_1383	Oxyterracin	土曲霉素	metab_427	B(ii)	map01100;map01110	Metabolic pathways;Biosynthesis of secondary metabolites	HMDB0256024;HMDB0014733	M+	C22H24N2O9	5.1594	代谢途径;次级代谢产物的生物合成	C06624	pos	-	-	Metabolism;Metabolism	Global and overview maps;Global and overview maps	Phenylpropanoids and polyketides	Tetracyclines	460.146	0.0689019	0	36	-4.35286	79-57-2	Not Available	2.182	2.667	0.7235	1.727	2.235	2.116	1.421	1.603	2.511	2.055	2.138	1.88	1.259	2.328	1.928	2.155	1.806	1.9	2.027	2.022	2.075
neg_1140	Mitomycin	丝裂霉素	metab_3885	B(ii)	-	-	HMDB0014450	M+Cl	C15H18N4O5	5.9685	-	C06681	neg	Antibiotics	Others	-	-	Organoheterocyclic compounds	Indoles and derivatives	369.099	0.0372629	0	37.2	5.86664	1950-07-07	Indolequinones	1.391	0.8126	1.59	1.345	0.8277	1.462	1.569	0.8933	1.54	0.8674	1.506	1.892	1.578	1.47	1.71	1.363	1.792	1.172	1.462	1.431	1.45
pos_2020	Triethanolamine	三乙醇胺	metab_1136	B(i)	map00564	Glycerophospholipid metabolism	HMDB0032538	M+H	C6H15NO3	11.2656	甘油磷脂代谢	C06771	pos	-	-	Metabolism	Lipid metabolism	Organic nitrogen compounds	Organonitrogen compounds	150.112	0.0995704	93.9	0	-0.638318	102-71-6	Amines	2.47	2.558	2.547	2.611	2.575	2.605	2.501	2.595	2.41	2.621	2.494	2.57	2.675	2.517	2.522	2.518	2.737	2.545	2.529	2.572	2.615
neg_1252	Risperidone	利培酮	metab_4008	B(ii)	-	-	HMDB0005020	M-H2O-H	C23H27FN4O2	5.2838	-	C06861	neg	-	-	-	-	Organoheterocyclic compounds	Pyridopyrimidines	391.196	0.222547	0	36.7	6.01398	106266-06-2	Not Available	2.431	2.827	0.2669	1.698	1.605	2.485	1	0.2943	0.988	0.2835	0.5368	0.2834	0.2317	0.6808	0.8479	0.7585	0.9975	1.183	2.22	2.031	2.108
pos_1361	Cefamandole	头孢羟苄唑	metab_403	B(ii)	-	-	HMDB0015421	M+CH3OH+H	C18H18N6O5S2	4.8701	-	C06879	pos	-	-	-	-	Organic acids and derivatives	Carboxylic acids and derivatives	495.115	0.0657973	0	42.7	7.05322	34444-01-4	Amino acids, peptides, and analogues	2.042	0.03535	2.954	0.02587	0.02688	0.03091	0.02539	3.002	3.399	2.168	1.889	2.919	0.02634	0.03461	0.03291	1.574	0.03147	3.063	2.451	2.508	2.475
pos_2774	Cefprozil	头孢丙烯	metab_1972	B(ii)	-	-	HMDB0015281	M+ACN+H	C18H19N3O5S	6.2867	-	C06888	pos	-	-	-	-	Organoheterocyclic compounds	Lactams	431.138	0.0829068	0	33.2	-0.477921	92665-29-7	Beta lactams	2.124	2.085	1.874	2.068	2.283	1.915	1.244	1.137	2.355	1.876	2.555	1.609	2.187	2.446	2.131	2.259	2.051	1.567	2.105	2.068	2.14
pos_1375	Chlorpheniramine	扑尔敏	metab_418	B(ii)	-	-	HMDB0001944;PW_C001303	2M+Na	C16H19ClN2	5.0323	-	C06905	pos	-	-	-	-	Organoheterocyclic compounds	Pyridines and derivatives	571.234	0.105826	0	33.7	-4.01059	113-92-8;132-22-9	Pheniramines	3.075	3.425	1.992	1.776	2.6	2.881	2.025	1.606	2.078	2.063	2.027	1.855	2.011	2.678	2.825	2.314	1.976	2.153	2.589	2.674	2.669
neg_818	Danatrol	达纳特罗	metab_5139	B(ii)	-	-	HMDB0250842;HMDB0002835	2M-H	C22H27NO2	9.6209	-	C06938	neg	-	-	-	-	Lipids and lipid-like molecules	Steroids and steroid derivatives	673.396	0.116126	0	33.9	-8.24336	17230-88-5	Estrane steroids	2.292	1.547	2.11	2.315	2.178	2.341	2.539	2.541	2.485	2.05	2.259	2.837	2.211	1.559	1.81	2.254	1.798	2.255	2.312	2.211	2.272
pos_3151	Doxycycline	强力霉素	metab_2392	B(ii)	-	-	HMDB0014399;PW_C008796;HMDB0303043;LMPK07000001;MJDBOTE0001556	M+ACN+Na	C22H24N2O8	4.2291	-	C06973	pos	-	-	-	-	Phenylpropanoids and polyketides	Tetracyclines	508.165	0.00642456	0	32.6	-8.80447	564-25-0	Not Available	2.829	2.307	2.456	2.527	2.506	2.742	2.393	2.521	2.869	2.361	2.778	2.672	2.676	2.595	2.425	2.811	2.685	2.829	2.586	2.591	2.589
pos_1195	Cis-Acetylacrylate	-	metab_218	B(ii)	-	-	HMDB0060461	M+H-H2O	C5H6O3	2.6237	-	C07091	pos	-	-	-	-	Organic acids and derivatives	Keto acids and derivatives	97.0283	0.0980074	0	89.8	-0.567382	-	Short-chain keto acids and derivatives	1.617	1.294	1.876	1.658	1.813	2.169	2.206	2.037	2.063	2.021	1.973	2.033	1.849	1.75	1.968	2.201	2.058	2.395	1.943	2.027	2.002
pos_2376	1-Phenylethanol	1-苯乙醇	metab_1530	B(ii)	-	-	HMDB0032619	M+H-H2O	C8H10O	8.9579	-	C07112	pos	-	-	-	-	Benzenoids	Benzene and substituted derivatives	105.07	0.0748737	0	95.7	-1.91746	98-85-1	Not Available	2.115	2.319	1.639	2.098	2.06	2.077	1.562	1.508	2.327	1.828	2.24	1.682	2.061	2.334	1.925	1.913	1.855	1.647	2.006	2.017	2.066
neg_673	Temazepam	替马西泮	metab_4978	B(ii)	-	-	HMDB0014376	M+FA-H	C16H13ClN2O2	6.1029	-	C07125	neg	-	-	-	-	Organoheterocyclic compounds	Benzodiazepines	345.062	0.0818515	0	36.4	-7.98363	846-50-4	1,4-benzodiazepines	0.8671	0.001832	2.784	0.002082	0.001908	0.002142	0.8937	1.953	3.768	2.223	1.376	3.144	0.00895	0.03553	0.6259	0.8053	0.435	2.416	2.742	2.751	2.806
pos_2499	Venlafaxine	文拉法辛	metab_1666	B(ii)	-	-	PW_C002364;HMDB0005016	M+ACN+H	C17H27NO2	8.1334	-	C07187	pos	-	-	-	-	Benzenoids	Phenol ethers	319.239	0.262558	0	93.8	5.02147	93413-69-5	Anisoles	1.418	1.561	1.138	1.43	0.4699	0.7222	0.6238	0.04062	1.15	0.05406	1.005	0.04588	1.067	1.311	0.05577	0.456	0.8628	0.4652	1.225	1.047	1.059
pos_3149	Mibefradil	米贝夫拉地尔	metab_2389	B(ii)	-	-	HMDB0254702	M+H-2H2O	C29H38FN3O3	4.2405	-	C07222	pos	-	-	-	-	Benzenoids	Tetralins	460.276	0.156752	0	32.2	0.116068	116644-53-2	Not Available	2.322	2.436	2.358	2.421	2.45	2.494	2.244	2.271	2.114	2.416	2.266	2.278	2.541	2.462	2.472	2.268	2.364	2.201	2.359	2.292	2.223
pos_2545	Nandrolone	诺龙	metab_1718	B(i)	-	-	LMST02010044;HMDB0002725	M+NH4	C18H26O2	7.7336	-	C07254	pos	-	-	-	-	Lipids and lipid-like molecules	Steroids and steroid derivatives	292.228	0.0744785	61.9	0	4.83383	434-22-0	Estrane steroids	1.1	1.637	1.312	1.276	1.354	1.423	1.325	1.285	1.213	1.497	1.286	1.558	1.609	1.827	1.758	1.231	1.38	1.282	1.369	1.394	1.43
pos_815	11-HpODE	11 HpODE	metab_3523	B(ii)	map00591	Linoleic acid metabolism	HMDB0062281;LMFA02000115	M+H-H2O, M+H	C18H32O4	8.7037	亚油酸	C07338	pos	-	-	Metabolism	Lipid metabolism	Lipids and lipid-like molecules	Fatty Acyls	295.227	0.0705789	0	62.4	0.511191	-	Lineolic acids and derivatives	3.5	3.761	3.33	3.52	3.509	3.615	3.502	3.42	3.532	3.605	3.612	3.395	3.515	3.641	3.753	3.564	3.887	3.334	3.538	3.581	3.598
neg_1357	3-hydroxyquinidine	3 -羟基奎尼丁	metab_4124	B(ii)	-	-	HMDB0001091;HMDB0245907	M+K-2H	C20H24N2O3	4.3778	-	C07344	neg	-	-	-	-	Alkaloids and derivatives	Cinchona alkaloids	377.124	0.0404598	0	45.1	-8.67211	53467-23-5	Not Available	1.529	0.7336	2.289	1.413	0.7482	1.484	1.524	2.095	2.063	1.853	1.504	2.228	1.398	0.7439	0.9497	1.615	1.23	1.992	1.708	1.728	1.694
pos_1214	Propranolol	心得安	metab_240	B(ii)	-	-	HMDB0001849;PW_C001224	M+H	C16H21NO2	2.7251	-	C07407	pos	-	-	-	-	Benzenoids	Naphthalenes	260.162	0.211861	0	39.1	-8.89482	525-66-6	Not Available	1.677	1.955	1.635	1.34	1.379	1.748	1.713	1.416	1.804	1.842	2.03	1.791	1.765	1.887	2.017	1.732	1.884	1.591	1.664	1.839	1.825
pos_2073	Phenmetrazine	芬美拉嗪	metab_1194	B(ii)	-	-	HMDB0014968	M+H	C11H15NO	11.2541	-	C07432	pos	-	-	-	-	Organoheterocyclic compounds	Oxazinanes	178.122	0.291211	0	79	-1.05516	134-49-6	Morpholines	1.567	1.528	1.549	1.918	1.785	0.9744	0.9312	1.191	1.343	1.467	1.443	1.273	1.729	1.357	1.531	1.339	1.631	1.727	1.548	1.38	1.325
pos_1280	Caffeine	咖啡因	metab_313	B(i)	map01100;map01110;map00232	Metabolic pathways;Biosynthesis of secondary metabolites;Caffeine metabolism	HMDB0001847;PW_C001222	M+H	C8H10N4O2	3.7983	代谢途径;次级代谢产物的生物合成;咖啡因代谢	C07481	pos	-	-	Metabolism;Metabolism;Metabolism	Global and overview maps;Global and overview maps;Biosynthesis of other secondary metabolites	Organoheterocyclic compounds	Imidazopyrimidines	195.088	0.0187365	39.3	0	1.1825	1958-08-02	Purines and purine derivatives	2.145	2.141	2.205	2.317	2.202	2.382	2.186	2.196	2.058	2.104	2.14	2.299	2.35	2.203	2.238	2.21	2.261	2.31	2.2	2.214	2.214
pos_1547	Ketamine	氯胺酮	metab_609	B(ii)	-	-	HMDB0015352	M+K	C13H16ClNO	6.8195	-	C07525	pos	-	-	-	-	Benzenoids	Benzene and substituted derivatives	276.055	0.157078	0	60.6	0.377261	6740-88-1	Halobenzenes	1.802	1.822	1.269	1.08	1.555	1.371	0.5685	1.758	2.04	1.863	1.564	0.699	0.5806	1.434	1.39	1.593	1.284	1.55	1.525	1.583	1.657
pos_3187	Sertindole	舍吲哚	metab_2431	B(ii)	-	-	HMDB0015618	M+ACN+Na	C24H26ClFN4O	3.8433	-	C07567	pos	-	-	-	-	Organoheterocyclic compounds	Pyrroles	504.195	0.177317	0	38.3	2.14145	106516-24-9	Substituted pyrroles	2.133	1.407	1.834	0.5232	1.667	2.666	2.213	1.947	2.593	1.47	2.198	1.443	1.231	1.522	1.282	2.313	2.245	2.932	2.072	2.132	2.222
pos_3050	Pteroic acid	蕨酸	metab_2280	B(ii)	-	-	HMDB0256914	M+H	C14H12N6O3	4.9396	-	C07582	pos	-	-	-	-	Organoheterocyclic compounds	Pteridines and derivatives	313.107	0.0449783	0	68.4	9.33735	119-24-4	Pterins and derivatives	2.315	1.06	1.848	2.078	2.222	2.445	2.361	2.25	2.695	2.134	2.652	2.355	2.061	2.117	2.263	2.536	2.358	2.501	2.315	2.347	2.351
pos_1205	Oxypurinol	氧嘌呤醇	metab_230	B(ii)	-	-	HMDB0000786	M+H	C5H4N4O2	2.6576	-	C07599	pos	-	-	-	-	Organoheterocyclic compounds	Imidazopyrimidines	153.041	0.0968469	0	49.2	0.611996	2465-59-0	Purines and purine derivatives	1.618	1.816	1.205	0.6606	0.7192	0.7242	0.8017	0.6317	0.7593	1.887	0.8651	0.6749	1.146	1.311	1.521	0.9278	1.156	0.6648	1.262	1.295	1.341
neg_1329	Ginkgolide A	银杏内酯A	metab_4093	B(ii)	map00904;map01110	Diterpenoid biosynthesis;Biosynthesis of secondary metabolites	LMPR0104540001;HMDB0036862;MJDBOTE0001317	M-H2O-H	C20H24O9	4.6698	二萜生物合成;次级代谢产物的生物合成	C07601	neg	-	-	Metabolism;Metabolism	Metabolism of terpenoids and polyketides;Global and overview maps	Lipids and lipid-like molecules	Prenol lipids	389.125	0.0303152	0	30.6	2.811	15291-75-5	Sesquiterpenoids	2.389	1.588	2.276	2.392	2.519	2.428	2.261	2.646	2.765	2.509	2.604	2.594	2.238	2.173	2.147	2.671	2.307	2.538	2.481	2.458	2.459
pos_969	Miglitol	米格利托	metab_3693	B(ii)	-	-	HMDB0014634;MJDBOTE0000907	M+H-H2O, M+	C8H17NO5	11.1787	-	C07708	pos	-	-	-	-	Organoheterocyclic compounds	Piperidines	190.107	0.145104	0	36.7	-0.402578	72432-03-2	Not Available	3.203	3.363	3.401	3.338	3.346	3.484	3.087	3.189	3.062	3.137	3.155	3.238	3.302	3.247	3.307	3.237	3.445	3.144	3.345	3.259	3.226
pos_508	Mometasone furoate	糠酸莫米松	metab_3182	B(ii)	-	-	HMDB0014902;HMDB0254838	M+NH4, M+CH3OH+H	C27H30Cl2O6	4.4685	-	C07816;C07817	pos	-	-	-	-	Lipids and lipid-like molecules	Steroids and steroid derivatives	538.175	0.0679645	0	33.6	-2.31965	83919-23-7;105102-22-5	Pregnane steroids	3.242	2.987	3.104	3.082	2.967	3.214	3.066	3.031	3.337	3.021	3.224	3.249	3.214	3.199	3.043	3.263	3.142	3.193	3.112	3.169	3.158
pos_1279	Bacampicillin	杆菌青霉素	metab_311	B(ii)	-	-	HMDB0015540	M+ACN+H	C21H27N3O7S	3.787	-	C08122	pos	-	-	-	-	Organoheterocyclic compounds	Lactams	507.187	0.268628	0	51.4	-7.91877	50972-17-3	Beta lactams	1.474	0.9702	1.324	1.46	0.3255	1.192	1.365	0.6886	2.008	0.6069	1.759	1.354	1.812	1.5	1.208	1.761	1.653	1.742	1.289	1.505	1.501
neg_1144	Fludrocortisone acetate	醋酸氟氢可的松	metab_5341	B(ii)	-	-	HMDB0002802;LMST02030122;HMDB0252329	M-H2O-H	C23H31FO6	5.9237	-	C08186	neg	-	-	-	-	Lipids and lipid-like molecules	Steroids and steroid derivatives	403.19	0.0433469	0	34.7	-5.51187	514-36-3;53-06-5	Hydroxysteroids	2.389	2.257	2.362	1.769	1.56	2.207	2.515	2.028	2.294	2.025	1.884	2.435	1.511	2.027	1.709	2.097	1.934	2.122	2.226	2.209	2.189
pos_281	Ajugose	-	metab_2012	B(ii)	-	-	HMDB0304260	M+Na, M+K, M+H+Na	C36H62O31	1.2476	-	C08238	pos	-	-	-	-	Organic oxygen compounds	Organooxygen compounds	1029.3	0.133539	0	46.3	5.53578	512-72-1	Carbohydrates and carbohydrate conjugates	4.216	3.817	4.566	4.298	4.274	4.802	4.775	4.686	4.709	4.687	4.531	4.65	4.376	4.047	4.376	4.637	4.697	5.063	4.506	4.618	4.601
neg_392	Melezitose	蜂毒糖	metab_4669	B(i)	-	-	HMDB0011730;MJDBOTE0000489	M+FA-H	C18H32O16	1.7564	-	C08243	neg	-	-	-	-	Organic oxygen compounds	Organooxygen compounds	549.169	0.0807166	71.1	0	3.46627	597-12-6	Carbohydrates and carbohydrate conjugates	3.555	2.785	3.893	3.655	3.769	3.76	3.986	3.926	3.748	3.726	3.786	4.006	3.887	3.61	3.774	3.844	3.788	3.967	3.765	3.758	3.82
neg_1156	Azelaic acid	壬二酸	metab_3901	B(ii)	-	-	HMDB0000784;LMFA01170054	M-H	C9H16O4	5.8451	-	C08261	neg	-	-	-	-	Lipids and lipid-like molecules	Fatty Acyls	187.098	0.0560653	0	54.6	4.4226	123-99-9	Fatty acids and conjugates	2.937	3.081	2.583	2.799	2.838	2.849	2.987	2.567	2.679	3.043	2.776	2.671	2.836	3.293	3.372	3.05	3.282	2.605	2.988	2.989	3.03
pos_2101	Sebacic acid	癸二酸	metab_1226	B(i)	-	-	HMDB0000792;LMFA01170006	M+H	C10H18O4	10.2113	-	C08277	pos	-	-	-	-	Lipids and lipid-like molecules	Fatty Acyls	203.128	0.0469167	60.8	0	-0.352695	111-20-6	Fatty acids and conjugates	3.897	3.913	4.045	3.998	3.983	4.011	4.014	4.014	3.753	4.006	3.828	4.04	4.056	3.945	3.901	3.884	3.948	3.922	3.937	3.914	3.897
pos_2481	Behenic acid	山核桃酸	metab_1647	B(ii)	map00073;map01040	Cutin, suberine and wax biosynthesis;Biosynthesis of unsaturated fatty acids	HMDB0000944;LMFA01010022;HMDB0304269	M+NH4	C22H44O2	8.3161	角质、木栓碱和蜡的生物合成;不饱和脂肪酸的生物合成	C08281	pos	Lipids	Fatty acids	Metabolism;Metabolism	Lipid metabolism;Lipid metabolism	Lipids and lipid-like molecules	Fatty Acyls	358.369	0.0229407	0	40.1	1.60404	112-85-6	Fatty acids and conjugates	3.866	3.949	3.522	4.007	4.071	3.994	3.844	3.376	4.149	4.113	4.213	3.902	3.935	4.406	4.041	4.043	3.855	3.806	3.977	3.99	3.997
pos_2806	O-Oxalylhomoserine	O -草酰高丝氨酸	metab_2008	B(ii)	-	-	HMDB0302143	M+H-H2O	C6H9NO6	6.1072	-	C08294	pos	-	-	-	-	Organic acids and derivatives	Carboxylic acids and derivatives	174.04	0.0235967	0	85.1	-0.631358	4096-48-4	Amino acids, peptides, and analogues	2.163	2.43	1.793	2.06	2.394	1.834	1.757	1.838	2.367	2.154	2.494	1.8	2.032	2.374	2.317	2.181	1.965	1.847	2.198	2.178	2.189
pos_2072	12-Hydroxydodecanoic acid	12-羟基十二酸	metab_1193	B(ii)	-	-	HMDB0002059;HMDB0304547	M+Na	C12H24O3	11.2541	-	C08317	pos	-	-	-	-	Organic acids and derivatives	Hydroxy acids and derivatives	239.162	0.136209	0	53.5	1.6134	505-95-3	Medium-chain hydroxy acids and derivatives	2.251	2.297	2.509	2.265	2.37	2.515	2.357	2.33	2.375	2.452	2.492	2.379	2.481	2.406	2.401	2.451	2.531	2.385	2.479	2.36	2.425
pos_1118	Gynocardin	绞股蓝素	metab_133	B(ii)	-	-	HMDB0029913	M+H-H2O	C12H17NO8	1.2135	-	C08331	pos	-	-	-	-	Organic oxygen compounds	Organooxygen compounds	286.093	0.148349	0	82	1.3667	14332-17-3	Carbohydrates and carbohydrate conjugates	3.679	3.572	3.776	3.753	3.544	3.629	3.727	3.945	3.959	4.045	3.867	4.061	3.759	3.786	3.831	3.833	3.82	3.789	3.703	3.824	3.816
pos_1308	Lotaustralin	洛托司他林	metab_344	B(ii)	map00460;map01110	Cyanoamino acid metabolism;Biosynthesis of secondary metabolites	HMDB0033865	M+ACN+Na	C11H19NO6	4.252	氰基氨基酸代谢;次级代谢产物的生物合成	C08334	pos	-	-	Metabolism;Metabolism	Metabolism of other amino acids;Global and overview maps	Organic oxygen compounds	Organooxygen compounds	325.137	0.01755	0	42.4	-0.895295	534-67-8	Carbohydrates and carbohydrate conjugates	2.306	2.194	1.992	1.605	1.939	1.887	2.114	1.87	2.517	2.322	2.509	2.186	2.159	2.565	2.422	2.317	1.828	2.149	2.201	2.214	2.215
pos_3328	Neolinustatin	新尿抑素	metab_2588	B(ii)	-	-	HMDB0038482	M+CH3OH+H	C17H29NO11	2.7137	-	C08336	pos	-	-	-	-	Organic oxygen compounds	Organooxygen compounds	456.209	0.170737	0	41.9	3.31181	72229-42-6	Carbohydrates and carbohydrate conjugates	2.419	1.198	2.879	2.416	2.697	2.92	2.696	2.67	2.747	2.514	2.681	2.576	2.571	2.145	2.41	2.776	2.67	3.114	2.817	2.683	2.707
pos_3250	Zierin	间羟杏仁腈苷	metab_2502	B(ii)	-	-	HMDB0301769	M+ACN+H	C14H17NO7	3.3132	-	C08345	pos	-	-	-	-	Organic oxygen compounds	Organooxygen compounds	353.134	0.036942	0	31.3	0.301854	645-02-3	Carbohydrates and carbohydrate conjugates	3.141	3.176	2.711	2.957	2.816	2.908	2.784	2.66	3.039	2.903	3.058	2.738	2.838	3.194	3.018	3.016	3.06	2.65	2.942	2.971	2.97
pos_3537	Beta-D-Glucopyranuronic acid	β - D -葡萄糖醛酸	metab_2820	B(ii)	-	-	HMDB0010314	M+H-2H2O	C13H14O9	1.0865	-	C08350	pos	-	-	-	-	Organic oxygen compounds	Organooxygen compounds	279.049	0.141101	0	68.9	-4.17923	29315-53-5	Carbohydrates and carbohydrate conjugates	2.293	2.224	2.044	2.24	2.019	2.268	2.171	1.964	2.325	2.294	2.411	2.169	2.198	2.421	2.285	2.262	2.285	2.12	2.189	2.268	2.312
neg_981	Punicic acid	石榴酸	metab_5317	B(ii)	-	-	LMFA01030146;HMDB0030963	M+FA-H	C18H30O2	8.2156	-	C08364	neg	-	-	-	-	Lipids and lipid-like molecules	Fatty Acyls	323.223	0.244548	0	35	1.81983	544-72-9	Lineolic acids and derivatives	2.018	1.655	1.725	2.19	2.175	2.073	2.038	0.6145	1.825	2.606	1.942	2.004	1.881	2.248	1.884	1.566	1.855	1.406	2.128	2.041	1.913
pos_2769	Capillin	毛蒿素	metab_1966	B(ii)	-	-	HMDB0032867	M+H	C12H8O	6.3222	-	C08398	pos	-	-	-	-	Benzenoids	Benzene and substituted derivatives	169.065	0.110397	0	47.9	0.0537395	495-74-9	Benzoyl derivatives	2.244	2.307	1.998	2.294	2.081	2.255	2.076	2.112	2.284	2.013	2.417	1.891	2.131	2.4	2.245	2.262	2.209	2.055	2.157	2.21	2.253
neg_1107	Vicine	维辛	metab_3848	B(ii)	-	-	HMDB0034073	M+Na-2H	C10H16N4O7	6.1916	-	C08437	neg	-	-	-	-	Organic oxygen compounds	Organooxygen compounds	325.076	0.122918	0	37.7	-0.340801	152-93-2	Carbohydrates and carbohydrate conjugates	1.293	0.841	0.6648	1.044	0.9114	1.268	0.6472	0.3697	1.002	0.07465	1.109	0.4532	0.6808	1.084	1.279	1.344	1.236	0.7207	1.33	1.238	1.252
pos_2921	Alpha-amanitin	-	metab_2136	B(ii)	-	-	HMDB0248187	M+Na	C39H54N10O14S	5.7001	-	C08438	pos	-	-	-	-	Lipids and lipid-like molecules	Fatty Acyls	941.349	0.111625	0	37.3	5.59107	23109-05-9	Fatty acid esters	2.84	0.9288	3.088	2.503	1.547	2.575	2.013	2.461	3.081	2.792	2.256	2.976	2.31	2.018	1.413	2.813	2.624	2.981	2.692	2.72	2.624
pos_1445	Dehydrosafynol	脱氢玫瑰醇	metab_496	B(ii)	-	-	LMFA05000649;HMDB0301833	M+CH3OH+H	C13H10O2	5.9635	-	C08447	pos	-	-	-	-	Lipids and lipid-like molecules	Fatty Acyls	231.102	0.273491	0	38.5	0.153454	1540-85-8	Fatty alcohols	1.53	0.8244	0.6936	0.7081	0.722	0.7734	1.627	1.475	1.784	1.866	0.8271	1.541	0.7145	0.8162	1.355	1.525	0.7802	1.226	1.386	1.503	1.274
pos_2511	Eutypine	-	metab_1681	B(ii)	-	-	HMDB0301834	M+CH3OH+H	C12H10O2	8.0192	-	C08448	pos	-	-	-	-	Organic oxygen compounds	Organooxygen compounds	219.102	0.0028644	0	54.1	2.13871	121007-17-8	Carbonyl compounds	3.624	4.467	1.544	2.657	3.381	3.066	2.581	2.131	3.148	2.782	2.931	2.361	2.497	2.978	3.251	2.954	3.788	1.889	3.469	3.469	3.471
pos_2331	2,2':5',2''-Terthiophene	2,2’：5’，2’’-三噻吩	metab_1481	B(ii)	-	-	HMDB0245378	M+H	C12H8S3	9.0525	-	C08460	pos	-	-	-	-	Organoheterocyclic compounds	Bi- and oligothiophenes	248.985	0.290896	0	51	-5.85588	-	Not Available	1.034	2.237	1.423	1.849	2.569	2.521	1.52	2.16	2.378	2.129	2.51	0.8094	1.166	1.657	2.486	2.606	1.544	2.418	2.154	2.178	2.37
pos_1729	(Z)-3-Methyl-2-(2-pentenyl)-2-cyclopenten-1-one	（Z） -3-甲基-2-（2-戊烯基）-2-环戊烯-1-酮	metab_811	B(ii)	-	-	HMDB0035601	M+H-H2O	C11H16O	8.9462	-	C08490	pos	-	-	-	-	Organic oxygen compounds	Organooxygen compounds	147.117	0.0172453	0	50.8	-1.86221	488-10-8	Carbonyl compounds	2.879	3.082	1.829	3.011	2.928	2.934	2.106	1.554	3.189	2.388	3.159	1.708	2.79	3.123	2.757	2.604	2.677	1.721	2.827	2.826	2.813
neg_695	3-Hexen-1-ol	3-己烯-1-醇	metab_5002	B(ii)	map00592;map01110	alpha-Linolenic acid metabolism;Biosynthesis of secondary metabolites	HMDB0030003;HMDB0302264;HMDB0302313	M+FA-H	C6H12O	6.4472	α-亚麻酸代谢;次级代谢产物的生物合成	C08492	neg	-	-	Metabolism;Metabolism	Lipid metabolism;Global and overview maps	Lipids and lipid-like molecules	Fatty Acyls	145.088	0.106894	0	33.2	8.34316	928-96-1	Fatty alcohols	3.138	3.07	2.858	3.247	3.285	3.179	3.05	2.853	3.245	2.959	3.228	2.947	3.236	3.321	3.222	3.274	3.192	2.923	3.136	3.228	3.176
pos_3287	Humilixanthin	腐殖黄质	metab_2542	B(ii)	-	-	HMDB0039123	2M+NH4	C14H18N2O7	3.211	-	C08548	pos	-	-	-	-	Organic acids and derivatives	Carboxylic acids and derivatives	670.258	0.193467	0	72.1	1.40526	111534-70-4	Amino acids, peptides, and analogues	2.534	1.891	2.604	1.668	1.652	2.234	2.638	2.497	2.894	2.401	2.967	2.836	2.265	2.705	2.768	2.776	2.488	2.82	2.589	2.642	2.749
pos_3420	Prebetanin	前甜菜碱	metab_2691	B(ii)	-	-	HMDB0029411	M+H-2H2O	C24H26N2O16S	1.3383	-	C08567	pos	-	-	-	-	Alkaloids and derivatives	Betalains	595.087	0.154553	0	37.5	1.37822	13798-16-8	Betacyanins and derivatives	3.526	3.17	3.46	2.694	3.209	3.174	3.525	3.744	3.685	3.61	3.724	3.697	3.381	3.627	3.586	3.548	3.296	3.322	3.517	3.652	3.601
pos_1344	Vulgaxanthin I	仙人掌黄素I	metab_384	B(ii)	-	-	HMDB0029840	2M+H	C14H17N3O7	4.6628	-	C08568	pos	-	-	-	-	Organic acids and derivatives	Carboxylic acids and derivatives	679.217	0.104056	0	33.8	-5.61759	904-62-1	Amino acids, peptides, and analogues	2.624	2.509	2.062	2.343	2.235	2.58	2.458	2.475	2.714	2.392	2.558	2.274	2.041	2.169	2.115	2.469	2.329	2.553	2.37	2.398	2.457
pos_1206	Tuliposide B	郁金香甙B	metab_231	B(ii)	-	-	HMDB0303141;LMFA13010038	M+NH4	C11H18O9	2.6576	-	C08570	pos	-	-	-	-	Organic oxygen compounds	Organooxygen compounds	312.131	0.144444	0	58.1	5.62431	19870-33-8	Carbohydrates and carbohydrate conjugates	2.273	2.284	1.978	2.019	1.915	2.093	2.208	1.933	2.347	2.227	2.288	2.17	2.125	2.393	2.242	2.256	2.235	2.057	2.146	2.252	2.265
pos_1824	Alpha-Bixin	-	metab_917	B(ii)	-	-	HMDB0035317	M+H-2H2O	C25H30O4	10.0093	-	C08582	pos	-	-	-	-	Lipids and lipid-like molecules	Prenol lipids	359.204	0.0842674	0	33.2	9.79524	6983-79-5	Diterpenoids	4.528	4.507	4.579	4.603	4.607	4.535	4.463	4.464	4.358	4.535	4.439	4.513	4.574	4.52	4.516	4.456	4.514	4.458	4.549	4.487	4.488
pos_2136	Betulin	白桦醇	metab_1264	B(i)	-	-	HMDB0036838;LMPR0106140005;MJDBOTE0001690	M+H	C30H50O2	10.0318	-	C08618	pos	-	-	-	-	Lipids and lipid-like molecules	Prenol lipids	443.385	0.144092	30.6	0	-8.25082	473-98-3	Triterpenoids	2.798	2.5	2.071	2.049	2.346	2.185	2.362	1.824	2.794	2.849	2.879	2.245	1.964	2.234	2.93	2.855	2.429	1.553	2.533	2.613	2.659
pos_2465	Ryanodine	Ryanodine	metab_1629	B(ii)	-	-	HMDB0257371	M+	C25H35NO9	8.3954	-	C08705	pos	-	-	-	-	Lipids and lipid-like molecules	Prenol lipids	493.23	0.114413	0	53	-2.96033	15662-33-6	Diterpenoids	2.507	2.502	2.643	2.443	2.391	2.237	2.638	2.508	2.624	2.572	2.61	2.417	2.486	2.476	2.491	2.447	2.575	2.463	2.348	2.257	2.344
neg_1304	Agar	琼脂	metab_4066	B(ii)	-	-	HMDB0248056	M+Cl	C14H24O9	4.8704	-	C08815	neg	-	-	-	-	Organic oxygen compounds	Organooxygen compounds	371.113	0.226239	0	36.7	5.01777	9002-18-0	Carbohydrates and carbohydrate conjugates	1.868	2.188	1.609	1.273	1.687	1.805	1.928	2.152	2.226	2.258	1.685	1.935	1.085	1.462	1.801	1.895	1.807	2.045	2.032	1.951	1.834
pos_2751	Miroestrol	葛雌素	metab_1947	B(ii)	-	-	HMDB0254751	M+Na	C20H22O6	6.4409	-	C08831	pos	-	-	-	-	Organoheterocyclic compounds	Naphthopyrans	381.134	0.026225	0	33	8.37664	2618-41-9	Not Available	2.651	2.56	2.173	2.112	2.315	2.234	2.606	2.408	2.774	2.587	2.567	2.512	2.107	2.555	2.863	2.744	2.684	2.276	2.585	2.563	2.579
neg_806	Asparagoside A	石刁柏苷A	metab_5126	B(ii)	-	-	HMDB0030046	M-H	C33H54O8	9.3829	-	C08886	neg	-	-	-	-	Lipids and lipid-like molecules	Fatty Acyls	577.377	0.159928	0	40.4	4.05649	14835-43-9	Fatty acids and conjugates	3.477	2.104	2.964	2.506	2.448	2.524	3.486	3.307	3.609	3.499	3.109	3.423	2.203	2.235	2.749	3.081	3.021	3.218	3.123	3.247	3.141
pos_2972	Alectrol	阿莱特罗	metab_2192	B(ii)	-	-	HMDB0041372	M+H-2H2O	C19H22O6	5.4394	-	C09059	pos	-	-	-	-	Organoheterocyclic compounds	Lactones	311.129	0.156828	0	78.4	2.5509	143572-84-3	Gamma butyrolactones	2.689	2.596	2.622	2.266	2.368	2.692	2.527	2.79	2.727	2.556	2.633	2.496	2.18	2.421	2.459	2.648	2.479	2.652	2.508	2.64	2.619
neg_969	Forskolin	福斯科林	metab_5342	B(ii)	-	-	LMPR0104030004;HMDB0032064;HMDB0252457;MJDBOTE0001052	M+Na-2H	C22H34O7	8.6416	-	C09076	neg	-	-	-	-	Organoheterocyclic compounds	Benzofurans	431.202	0.193017	0	40.4	-6.92457	3413-15-8;66575-29-9	Benzofuranones	2.075	1.719	1.911	1.847	1.74	2.089	2.301	2.016	1.948	1.969	1.94	2.101	1.778	1.832	1.99	1.863	2.189	1.884	2.161	2.132	1.996
pos_227	Sclareol oxide	香紫苏醚	metab_1412	B(ii)	map00904;map01110	Diterpenoid biosynthesis;Biosynthesis of secondary metabolites	HMDB0036827;HMDB0258180	M+H, M+NH4, M+H-H2O	C18H30O	9.3302	二萜生物合成;次级代谢产物的生物合成	C09183	pos	-	-	Metabolism;Metabolism	Metabolism of terpenoids and polyketides;Global and overview maps	Lipids and lipid-like molecules	Prenol lipids	280.264	0.0187125	0	30.7	0.560156	515-03-7	Diterpenoids	5.533	5.452	5.602	5.65	5.628	5.546	5.592	5.554	5.485	5.493	5.455	5.55	5.643	5.583	5.535	5.556	5.605	5.508	5.551	5.542	5.559
pos_3026	Tripdiolide	羟基雷公藤内酯	metab_2253	B(ii)	-	-	HMDB0259259	M+H-2H2O	C20H24O7	5.0436	-	C09202	pos	-	-	-	-	Organoheterocyclic compounds	Oxepanes	341.139	0.0889001	0	54.3	1.29386	38647-10-8	Not Available	3.71	3.711	3.508	3.427	3.544	3.724	3.546	3.751	3.856	3.631	3.827	3.5	3.377	3.487	3.511	3.733	3.613	3.706	3.627	3.685	3.703
pos_1432	Rutarin	芦塔林	metab_482	B(ii)	-	-	HMDB0030884	M+H-H2O	C20H24O10	5.8677	-	C09309	pos	-	-	-	-	Phenylpropanoids and polyketides	Coumarins and derivatives	407.134	0.108758	0	40.8	-0.231151	20320-81-4	Coumarin glycosides	2.008	0.01006	1.43	0.007306	0.007598	0.008765	2.17	1.808	2.112	2.033	1.93	1.815	1.139	1.934	1.734	2.027	1.815	2.202	1.814	1.82	1.895
pos_3021	Cynaropicrin	菜蓟苦素	metab_2248	B(ii)	-	-	HMDB0036423	M+H-2H2O	C19H22O6	5.0553	-	C09385;C09547	pos	-	-	-	-	Lipids and lipid-like molecules	Prenol lipids	311.128	0.0421466	0	67.5	1.54919	35730-78-0	Terpene lactones	2.804	2.943	2.282	2.471	2.562	2.671	2.426	2.42	2.826	2.414	2.738	2.368	2.36	2.589	2.593	2.62	2.537	2.452	2.6	2.609	2.635
pos_2747	Enhydrin	沼菊素	metab_1942	B(i)	-	-	HMDB0251809	M+Na	C23H28O10	6.4645	-	C09405	pos	-	-	-	-	Lipids and lipid-like molecules	Prenol lipids	487.157	0.0214554	32.4	0	-0.433812	33880-85-2	Terpene lactones	3.298	3.475	2.95	3.291	3.404	3.123	2.956	2.757	3.335	3.169	3.421	2.905	3.425	3.493	3.38	3.366	3.304	2.735	3.292	3.302	3.31
pos_2729	Helenalin	海伦纳林	metab_1922	B(ii)	-	-	HMDB0253066	M+Na	C15H18O4	6.5358	-	C09473	pos	-	-	-	-	Lipids and lipid-like molecules	Prenol lipids	285.11	0.0291519	0	67.4	0.332063	6754-13-8	Terpene lactones	2.397	2.25	1.965	2.211	2.434	2.214	2.184	2.041	2.75	2.467	2.6	2.247	2.222	2.396	2.432	2.517	2.3	2.137	2.362	2.38	2.387
pos_2702	Lactucin	莴苣苦素	metab_1893	B(ii)	-	-	HMDB0035814	M+H-2H2O	C15H16O5	6.6903	-	C09489	pos	-	-	-	-	Organoheterocyclic compounds	Lactones	241.086	0.111863	0	38.8	1.40414	1891-29-8	Gamma butyrolactones	1.881	2.143	1.213	1.843	2.243	1.699	0.5864	0.7499	2.102	1.764	2.321	0.9587	2.055	2.166	2.111	2.105	1.863	0.7851	1.919	2.009	2.001
pos_2701	Niveusin C	尼维辛C	metab_1892	B(ii)	-	-	HMDB0034474	M+H-2H2O	C20H26O7	6.6903	-	C09517	pos	-	-	-	-	Lipids and lipid-like molecules	Prenol lipids	343.153	0.135141	0	38.2	-1.44999	75680-27-2	Terpene lactones	1.406	1.711	0.4338	1.313	1.699	0.6865	0.4598	0.4412	1.722	1.408	1.924	0.4774	1.622	1.74	1.614	1.651	1.522	0.4688	1.441	1.539	1.549
pos_1730	Alpha-curcumene	-	metab_813	B(i)	-	-	HMDB0059878;HMDB0061838;LMPR0103060015	M+H	C15H22	8.9462	-	C09649	pos	-	-	-	-	Lipids and lipid-like molecules	Prenol lipids	203.179	0.0182233	50.1	0	-0.745672	4176-17-4	Sesquiterpenoids	4.148	4.403	3.149	4.157	4.042	4.069	3.336	2.99	4.393	3.692	4.365	2.999	4.015	4.381	3.915	3.767	3.856	3.088	4.03	4.019	4.034
pos_2318	Guaiol	愈创萜醇	metab_1466	B(ii)	-	-	HMDB0252966;LMPR0103410007	M+NH4	C15H26O	9.11	-	C09676	pos	-	-	-	-	Lipids and lipid-like molecules	Prenol lipids	240.233	0.0567192	0	30.9	2.18005	489-86-1	Sesquiterpenoids	2.7	2.637	2.803	2.922	2.906	2.658	2.767	2.69	2.657	2.609	2.725	2.686	2.785	2.722	2.724	2.785	2.938	2.727	2.788	2.778	2.74
pos_2493	Rishitin	利什汀	metab_1660	B(ii)	-	-	HMDB0302980;HMDB0035593	M+CH3OH+H	C14H22O2	8.2018	-	C09715	pos	-	-	-	-	Organic oxygen compounds	Organooxygen compounds	255.195	0.0824641	0	57	-0.166382	18178-54-6	Alcohols and polyols	1.083	1.101	1.323	1.303	1.692	1.374	1.321	1.613	1.37	1.387	1.423	1.363	1.551	1.114	1.292	1.323	1.578	1.202	1.394	1.352	1.421
pos_1475	Solavetivone	马铃薯螺二烯桐	metab_529	B(ii)	map01110;map00909	Biosynthesis of secondary metabolites;Sesquiterpenoid and triterpenoid biosynthesis	HMDB0035657	M+H	C15H22O	6.1194	次级代谢产物的生物合成;倍半萜和三萜生物合成	C09737	pos	-	-	Metabolism;Metabolism	Global and overview maps;Metabolism of terpenoids and polyketides	Lipids and lipid-like molecules	Prenol lipids	219.175	0.0245324	0	57.3	0.904442	54878-25-0	Sesquiterpenoids	3.95	4.345	3.31	3.63	3.645	3.539	3.362	3.171	3.816	3.763	3.688	3.279	3.506	3.919	3.69	3.597	3.725	3.249	3.728	3.748	3.745
neg_700	Hesperidin	橙皮苷	metab_5009	B(ii)	-	-	LMPK12140451;HMDB0003265	M-H	C28H34O15	6.4695	-	C09755	neg	-	-	-	-	Phenylpropanoids and polyketides	Flavonoids	609.186	0.062301	0	30.1	6.12055	520-26-3	Flavonoid glycosides	1.943	1.777	1.699	1.881	1.988	1.866	1.491	1.398	2.134	1.569	2.167	1.398	1.894	1.955	1.829	1.992	1.79	1.442	1.949	1.898	1.939
pos_1318	Agnuside	阿古西德	metab_355	B(ii)	-	-	HMDB0036561	M+H-2H2O	C22H26O11	4.3428	-	C09765	pos	-	-	-	-	Lipids and lipid-like molecules	Prenol lipids	431.135	0.058296	0	61	2.98358	11027-63-7	Terpene glycosides	3.671	3.105	3.51	3.35	3.221	3.49	3.48	3.534	3.836	3.463	3.559	3.662	3.264	3.297	3.169	3.537	3.349	3.63	3.492	3.529	3.541
pos_1283	Amarogentin	苦杏仁素	metab_316	B(ii)	-	-	HMDB0248275	M+	C29H30O13	3.8433	-	C09767	pos	-	-	-	-	Benzenoids	Benzene and substituted derivatives	586.169	0.0204019	0	32.5	0.0851008	21018-84-8	Biphenyls and derivatives	2.953	2.893	3.008	2.861	2.927	3.273	3.07	3.09	3.073	2.731	3.076	2.982	2.797	2.925	2.779	3.038	2.886	3.183	2.973	2.988	2.974
neg_1418	Gentiopicrin	龙胆苦苷	metab_4192	B(i)	map01110;map00902	Biosynthesis of secondary metabolites;Monoterpenoid biosynthesis	LMPR0102070009;HMDB0252696;MJDBOTE0000930	M-H	C16H20O9	3.5064	次级代谢产物的生物合成;单萜生物合成	C09782	neg	-	-	Metabolism;Metabolism	Global and overview maps;Metabolism of terpenoids and polyketides	Organic oxygen compounds	Organooxygen compounds	355.103	0.0833821	59.3	0	-1.73131	20831-76-9	Carbohydrates and carbohydrate conjugates	2.774	2.774	2.817	3.428	2.668	3.463	2.71	3.515	2.946	2.803	2.834	2.904	2.629	2.835	2.682	2.897	3.453	3.309	3.037	3.109	3.074
neg_471	Oleuropein	橄榄苦苷	metab_4757	B(ii)	-	-	HMDB0035872;MJDBOTE0001617	M-H2O-H	C25H32O13	3.9382	-	C09794	neg	-	-	-	-	Lipids and lipid-like molecules	Prenol lipids	521.167	0.0541276	0	34.9	1.48155	32619-42-4	Sesquiterpenoids	2.555	2.346	2.24	2.592	2.887	2.466	2.552	1.861	2.762	2.581	2.84	2.451	3.037	2.801	2.716	2.897	2.525	1.988	2.697	2.652	2.665
pos_2951	Plumieride	普卢米里德	metab_2169	B(ii)	-	-	HMDB0256647	M+Na	C21H26O12	5.5457	-	C09797	pos	-	-	-	-	Lipids and lipid-like molecules	Prenol lipids	493.136	0.107943	0	62.1	8.30499	511-89-7	Terpene glycosides	3.008	1.424	3.267	1.258	1.24	1.543	2.683	3.344	3.906	3.298	2.576	3.51	1.47	2.328	2.076	2.166	1.717	3.68	3.106	3.197	3.178
pos_3175	Isoeriocitrin	异麦角甾苷	metab_2418	B(ii)	-	-	HMDB0302534	M+ACN+H	C27H32O15	3.934	-	C09805	pos	-	-	-	-	Phenylpropanoids and polyketides	Flavonoids	638.203	0.058817	0	45.3	-7.71931	-	Flavonoid glycosides	2.046	1.499	2.034	2.066	1.857	1.931	1.977	2.136	2.105	1.989	1.94	1.999	1.485	1.959	1.887	2.053	2.098	2.077	1.958	1.986	2.008
neg_1208	Hesperetin 7-neohesperidoside	橙皮素7 -新橘皮糖苷	metab_3959	B(ii)	map00941	Flavonoid biosynthesis	HMDB0030748	M+FA-H	C28H34O15	5.5977	类黄酮生物合成	C09806	neg	-	-	Metabolism	Biosynthesis of other secondary metabolites	Lignans, neolignans and related compounds	Cyclobutane lignans	655.188	0.0289618	0	54	-0.0854692	13241-33-3	Not Available	2.992	3.185	2.487	2.851	3.091	3.021	2.268	2.279	3.106	2.681	3.159	2.147	2.724	3.048	2.912	2.843	2.769	2.304	2.933	2.924	2.908
pos_3102	(R)-2-Benzylsuccinate	（R） -2-丁二酸苄酯	metab_2338	B(ii)	map01100	Metabolic pathways	HMDB0012127	M+H	C11H12O4	4.6286	代谢途径	C09816	pos	-	-	Metabolism	Global and overview maps	Phenylpropanoids and polyketides	Phenylpropanoic acids	209.081	0.0485575	0	97.1	1.26789	884-33-3	Not Available	2.839	2.407	2.656	2.706	2.586	2.735	2.649	2.718	2.935	2.65	2.817	2.733	2.648	2.662	2.5	2.778	2.757	2.84	2.702	2.722	2.744
neg_660	Poncirin	蓬西林	metab_4964	B(ii)	-	-	HMDB0037487;LMPK12140333	M+FA-H	C28H34O14	5.9126	-	C09830	neg	-	-	-	-	Phenylpropanoids and polyketides	Flavonoids	639.194	0.0272504	0	51.6	2.21672	14941-08-3	Flavonoid glycosides	3.416	3.386	3.157	3.494	3.448	3.493	3.127	3.132	3.507	3.223	3.442	2.943	3.258	3.505	3.358	3.433	3.349	3.054	3.39	3.366	3.379
pos_3262	Bergenin	岩白菜内酯	metab_2515	B(ii)	-	-	HMDB0249087;MJDBOTE0000887	M+ACN+Na	C14H16O9	3.3017	-	C09919	pos	-	-	-	-	Benzenoids	Benzene and substituted derivatives	392.097	0.13087	0	67.1	6.52533	477-90-7	Benzoic acids and derivatives	2.489	2.437	2.061	2.273	1.761	2.12	2.212	1.757	2.283	2.086	2.331	2.054	1.959	2.45	2.228	2.261	2.331	1.893	2.227	2.319	2.222
pos_2546	5-hydroxycalamenene	5-羟基炉甘烯	metab_1719	B(ii)	-	-	HMDB0303912	M+H-H2O	C15H22O	7.7336	-	C09938	pos	-	-	-	-	Lipids and lipid-like molecules	Prenol lipids	201.164	0.0321798	0	35.3	0.448719	-	Sesquiterpenoids	3.062	3.147	1.411	3.24	3.13	3.04	1.38	1.267	3.744	2.269	3.432	1.319	3.112	3.429	2.84	2.731	2.764	1.505	3.127	3.145	3.118
pos_1517	(R)-Kawain	（R） -卡瓦因	metab_576	B(ii)	-	-	HMDB0034212	M+H-2H2O	C14H14O3	6.5593	-	C09947	pos	-	-	-	-	Phenylpropanoids and polyketides	Kavalactones	195.081	0.0516632	0	55.1	1.51173	500-64-1	Not Available	2.935	3.046	2.377	2.826	2.923	2.681	2.41	2.241	3.087	2.664	3.171	2.212	2.886	3.213	2.942	2.82	2.704	2.321	2.848	2.88	2.892
pos_1697	(S,E)-Zearalenone	（S，E）-玉米赤霉烯酮	metab_775	B(ii)	-	-	HMDB0031752	M+H-H2O	C18H22O5	8.6347	-	C09981	pos	-	-	-	-	Phenylpropanoids and polyketides	Macrolides and analogues	301.142	0.0361504	0	56.8	-5.26284	17924-92-4	Zearalenones	3.918	4.009	3.815	3.902	3.89	3.997	3.875	3.867	3.823	3.922	3.881	3.827	3.971	3.953	3.94	3.822	3.908	3.832	3.884	3.901	3.915
pos_2615	Physalin C	酸浆苦素C	metab_1796	B(ii)	-	-	HMDB0034094	M+H-2H2O	C28H30O9	7.1703	-	C09994	pos	-	-	-	-	Organic acids and derivatives	Carboxylic acids and derivatives	475.176	0.0295202	0	50.8	2.10497	27503-33-9	Amino acids, peptides, and analogues	3.566	3.275	2.996	3.3	3.344	3.148	3.255	3.327	3.688	3.482	3.652	3.478	3.083	3.195	3.392	3.493	3.371	3.327	3.43	3.418	3.444
neg_1307	5,7-Dimethoxyflavone	5,7-二甲氧基黄酮	metab_4069	B(ii)	-	-	HMDB0036620;LMPK12110188	M+FA-H	C17H14O4	4.8369	-	C10029	neg	-	-	-	-	Phenylpropanoids and polyketides	Flavonoids	327.088	0.00686978	0	38.1	2.69217	21392-57-4	O-methylated flavonoids	3.254	2.228	3.207	3.092	2.961	3.082	3.32	3.007	3.143	3.064	3.339	3.023	3.46	3.478	3.279	3.29	3.37	2.784	3.189	3.184	3.19
neg_1183	Diosmin	地奥司明	metab_3931	B(ii)	-	-	LMPK12110814;HMDB0029548	M+FA-H	C28H32O15	5.6989	-	C10039	neg	-	-	-	-	Phenylpropanoids and polyketides	Flavonoids	653.177	0.0114346	0	33.9	7.33496	520-27-4	Flavonoid glycosides	2.748	2.894	2.439	2.586	2.732	2.704	2.358	2.495	3.082	2.514	2.887	2.288	2.288	2.735	2.514	2.83	2.611	2.636	2.706	2.703	2.697
pos_2075	Fagomine	法戈明	metab_1196	B(ii)	-	-	HMDB0033453	M+H	C6H13NO3	11.2431	-	C10144	pos	-	-	-	-	Organoheterocyclic compounds	Piperidines	148.096	0.177521	0	72.9	-3.30928	53185-12-9	Not Available	1.622	1.547	1.641	1.556	1.657	1.685	1.326	1.507	1.394	1.491	1.348	1.459	1.507	1.451	1.591	1.517	1.771	1.439	1.461	1.312	1.421
neg_299	Nicotyrine	烟碱	metab_4565	B(ii)	-	-	HMDB0255591	M+Na-2H, M+FA-H	C10H10N2	3.3407	-	C10161	neg	-	-	-	-	Organoheterocyclic compounds	Pyridines and derivatives	203.083	0.0276176	0	59.4	3.79893	487-19-4	Not Available	3.501	3.204	3.498	3.425	3.325	3.254	3.52	3.406	3.376	3.558	3.478	3.576	3.523	3.552	3.603	3.543	3.433	3.393	3.471	3.466	3.448
pos_3482	Picolinic acid	皮考啉酸	metab_2759	B(ii)	map01100;map00380	Metabolic pathways;Tryptophan metabolism	HMDB0002243	M+H	C6H5NO2	1.2135	代谢途径;色氨酸代谢	C10164	pos	-	-	Metabolism;Metabolism	Global and overview maps;Amino acid metabolism	Organoheterocyclic compounds	Pyridines and derivatives	124.039	0.166341	0	40.7	-2.32037	98-98-6	Pyridinecarboxylic acids and derivatives	2.995	2.851	3.249	3.058	2.871	2.98	3.121	3.394	3.358	3.34	3.314	3.547	3.156	3.191	3.268	3.26	3.214	3.302	3.136	3.186	3.276
neg_1063	Tricin	麦黄酮	metab_3799	B(i)	-	-	LMPK12110873	M-H	C17H14O7	6.581	-	C10193	neg	-	-	-	-	-	-	329.068	0.00358116	78.5	0	4.02353	520-32-1	-	2.676	0.0008405	3.554	0.0009554	0.234	0.9984	3.115	3.841	3.826	3.427	2.181	3.881	1.052	1.489	0.4351	1.762	0.2215	4.057	3.238	3.241	3.24
neg_569	Cyclokievitone	环基维酮	metab_4864	B(ii)	-	-	HMDB0033983;LMPK12050493	M-H	C20H18O6	5.1384	-	C10207	neg	-	-	-	-	Phenylpropanoids and polyketides	Isoflavonoids	353.103	0.0163208	0	39.1	1.22727	74175-82-9	Isoflavans	3.234	2.733	2.964	3.242	3.136	3.242	3.163	3.131	3.319	3.198	3.329	3.131	2.946	3.013	3.132	3.282	3.246	3.226	3.193	3.181	3.181
neg_1306	Trans-Piceid	-	metab_4068	B(ii)	-	-	HMDB0030564	M-H2O-H	C20H22O8	4.8481	-	C10275	neg	-	-	-	-	Phenylpropanoids and polyketides	Stilbenes	371.112	0.168111	0	66.9	-3.61409	27208-80-6	Stilbene glycosides	0.8761	1.794	1.012	1.311	1.399	1.154	1.379	1.942	1.935	2.137	0.8969	1.728	0.3174	0.861	1.296	0.6603	1.333	1.681	1.647	1.504	1.579
neg_572	Glucocapangulin	葡萄糖苷	metab_4868	B(ii)	-	-	HMDB0302437	M+FA-H	C21H20O10	5.1719	-	C10345	neg	-	-	-	-	Benzenoids	Anthracenes	477.105	0.292335	0	36.6	2.56594	-	Anthraquinones	1.241	0.2918	2.348	0.3199	0.3006	0.3264	0.3367	2.461	2.52	1.629	0.7335	2.299	0.2672	0.298	0.3144	0.3399	0.3196	2.327	1.743	1.533	1.55
neg_999	5-O-Methylembelin	5-O-甲基林	metab_5335	B(ii)	-	-	HMDB0040867;LMPK15050007	M-H	C18H28O4	7.4948	-	C10373	neg	-	-	-	-	Organic oxygen compounds	Organooxygen compounds	307.192	0.24611	0	73.4	0.360047	56005-10-8	Carbonyl compounds	1.822	2.07	1.42	1.516	1.629	1.621	1.969	1.062	1.627	1.489	1.828	0.9486	1.25	1.874	2.026	1.471	2.316	1.189	1.815	1.882	1.665
neg_1224	Glucoobtusifolin	糖复合素	metab_3977	B(ii)	-	-	HMDB0029617	M+FA-H	C22H22O10	5.4969	-	C10381	neg	-	-	-	-	Benzenoids	Anthracenes	491.12	0.0381737	0	33.4	1.02151	120163-18-0	Anthraquinones	2.342	0.4044	2.89	0.439	0.4153	0.4469	1.592	2.942	3.411	2.771	1.729	3.145	0.3737	1.528	0.4322	0.4632	0.4386	3.25	2.61	2.617	2.585
neg_583	Glyceollin II	大豆抗毒素Ⅱ	metab_4880	B(ii)	map00943	Isoflavonoid biosynthesis	HMDB0034087	M-H	C20H18O5	5.2949	异黄酮生物合成	C10422	neg	-	-	Metabolism	Biosynthesis of other secondary metabolites	Phenylpropanoids and polyketides	Isoflavonoids	337.109	0.031887	0	32.4	2.2385	67314-98-1	Furanoisoflavonoids	3.299	3.412	2.93	3	3.051	3.187	3.277	3.18	3.272	3.074	3.054	3.122	2.874	3.06	3.239	3.125	3.116	3.072	3.173	3.2	3.18
neg_684	1-O-Caffeoyl-beta-D-glucose	1 - O -咖啡酰基- Beta - D -葡萄糖	metab_4990	B(ii)	-	-	HMDB0302440	M-H2O-H	C15H18O9	6.2697	-	C10433	neg	-	-	-	-	Lipids and lipid-like molecules	Steroids and steroid derivatives	323.078	0.00585344	0	36	3.35734	-	Stigmastanes and derivatives	1.846	1.752	1.557	1.678	2.094	1.834	1.505	1.322	2.184	2.002	1.993	1.196	1.523	1.774	1.914	2.26	1.681	1.241	1.842	1.847	1.846
pos_3044	Cinnamic acid	肉桂酸	metab_2273	B(ii)	-	-	HMDB0000567;HMDB0000930	M+CH3OH+H	C9H8O2	4.9858	-	C10438	pos	-	-	-	-	Phenylpropanoids and polyketides	Cinnamic acids and derivatives	181.086	0.0828062	0	43.5	-2.38732	140-10-3;621-82-9;102-94-3	Cinnamic acids	2.21	1.262	2.158	1.986	1.895	2.214	2.039	2.197	2.468	2.131	2.358	2.165	1.749	1.987	1.972	2.204	2.098	2.272	2.106	2.129	2.175
pos_1588	Curcumin	姜黄素	metab_654	B(ii)	map01110;map00945	Biosynthesis of secondary metabolites;Stilbenoid, diarylheptanoid and gingerol biosynthesis	HMDB0002269;MJDBOTE0000778	M+H-H2O	C21H20O6	7.182	次级代谢产物的生物合成;二苯乙烯类、二芳基庚烷类和姜辣素生物合成	C10443	pos	-	-	Metabolism;Metabolism	Global and overview maps;Biosynthesis of other secondary metabolites	Phenylpropanoids and polyketides	Diarylheptanoids	351.124	0.13474	0	95.9	3.68888	458-37-7	Linear diarylheptanoids	2.15	0.4945	1.495	1.474	1.748	1.106	1.714	1.815	2.418	2.169	2.233	2.147	1.654	1.409	1.94	2.135	1.845	2.006	1.953	1.914	2.026
pos_2094	1-Methoxy-4-(2-propenyl)benzene	1-甲氧基-4-（2-丙烯基）苯	metab_1217	B(ii)	map00940;map01110	Phenylpropanoid biosynthesis;Biosynthesis of secondary metabolites	HMDB0034121	M+H-H2O	C10H12O	10.2666	苯丙烷生物合成;次级代谢产物的生物合成	C10452	pos	-	-	Metabolism;Metabolism	Biosynthesis of other secondary metabolites;Global and overview maps	Benzenoids	Phenol ethers	131.085	0.173567	0	30.7	-4.42856	140-67-0	Anisoles	2.064	1.972	1.935	2.136	1.85	2.203	2.182	2.145	1.995	2.097	1.938	2.254	2.321	2.238	2.086	2.018	2.217	2.052	2.183	2.037	2.092
pos_1407	IRIDIN	香菖苷	metab_454	B(i)	-	-	LMPK12050415	M+H	C24H26O13	5.5099	-	C10465	pos	-	-	-	-	-	-	523.148	0.0708889	77.4	0	6.39269	491-74-7	-	3.069	2.628	3.355	2.582	2.665	2.806	2.807	3.917	3.601	3.159	3.036	3.402	2.677	2.832	2.521	2.948	2.753	4.053	3.324	3.379	3.378
neg_1147	Isoeugenol	异丁子香酚	metab_3891	B(i)	map00940	Phenylpropanoid biosynthesis	HMDB0005802	M-H	C10H12O2	5.9126	苯丙烷生物合成	C10469	neg	-	-	Metabolism	Biosynthesis of other secondary metabolites	Benzenoids	Phenols	163.077	0.237456	74.5	0	3.34728	97-54-1;5932-68-3	Methoxyphenols	2.627	1.986	2.569	2.354	2.092	2.183	2.822	2.747	2.874	2.993	2.352	2.773	2.33	2.505	2.664	2.662	2.49	2.7	2.695	2.553	2.765
pos_3143	Isoferulic acid	异阿魏酸	metab_2383	B(ii)	-	-	HMDB0259693;HMDB0000955	M+H-H2O	C10H10O4	4.286	-	C10470	pos	-	-	-	-	Phenylpropanoids and polyketides	Cinnamic acids and derivatives	177.055	0.043375	0	46.4	-0.474729	537-73-5;25522-33-2	Hydroxycinnamic acids and derivatives	2.17	1.383	2.128	2.071	2.396	2.705	2.048	2.408	2.756	2.184	2.773	2.204	2.346	2.101	1.953	2.632	2.096	2.277	2.422	2.416	2.387
pos_2991	Phaseolic acid	菜豆酸	metab_2213	B(ii)	-	-	LMFA01060200;HMDB0031897	M+H-2H2O	C12H22O6	5.2642	-	C10483	pos	-	-	-	-	Organic acids and derivatives	Keto acids and derivatives	227.129	0.0526575	0	36.1	3.62546	53755-04-7;29533-15-1	Medium-chain keto acids and derivatives	2.403	2.89	1.284	1.962	1.827	2.417	1.713	1.251	1.541	1.387	1.633	1.304	1.518	1.995	1.957	1.65	1.793	1.529	2.079	2.034	2.05
pos_3097	Acteoside	阿克替苷	metab_2331	B(ii)	-	-	HMDB0034843;HMDB0259785	M+H-2H2O	C29H36O15	4.6401	-	C10501	pos	-	-	-	-	Lipids and lipid-like molecules	Prenol lipids	589.192	0.123178	0	34.3	1.0946	61276-17-3	Triterpenoids	3.107	3.059	2.717	2.913	2.834	3.07	2.981	2.944	3.253	3.067	3.016	2.913	2.563	2.784	2.813	2.975	2.977	3.049	2.951	3.03	3.056
pos_2873	Medicarpin	麦卡平	metab_2082	B(ii)	map00943;map01100;map01110	Isoflavonoid biosynthesis;Metabolic pathways;Biosynthesis of secondary metabolites	HMDB0254403	M+CH3OH+H	C16H14O4	5.8435	异黄酮生物合成;代谢途径;次级代谢产物的生物合成	C10503	pos	-	-	Metabolism;Metabolism;Metabolism	Biosynthesis of other secondary metabolites;Global and overview maps;Global and overview maps	Phenylpropanoids and polyketides	Isoflavonoids	303.123	0.0333311	0	91.1	0.669096	32383-76-9	Furanoisoflavonoids	2.154	1.467	1.977	1.775	1.554	1.921	2.202	2.005	2.112	2.176	1.962	1.968	1.633	1.956	1.873	2.06	2.085	2.255	2.011	2.031	2.004
pos_1571	Psoralidin	补骨脂次素	metab_636	B(ii)	-	-	LMPK12090007;HMDB0034050;MJDBOTE0001199	M+CH3OH+H	C20H16O5	7.0423	-	C10523	pos	-	-	-	-	Phenylpropanoids and polyketides	Isoflavonoids	369.135	0.241496	0	82.6	3.7542	18642-23-4	Coumestans	0.6749	0.4483	1.47	1.706	1.128	1.42	0.697	1.349	1.585	1.54	0.7992	1.246	1.191	0.4421	0.4277	1.841	1.959	1.38	1.28	1.458	1.308
pos_3226	Tectorigenin	皂甙元	metab_2475	B(ii)	-	-	HMDB0042024;LMPK12050385;MJDBOTE0000251	2M+NH4	C16H12O6	3.4727	-	C10534	pos	-	-	-	-	Phenylpropanoids and polyketides	Isoflavonoids	618.16	0.137874	0	32	-1.60973	548-77-6	Isoflav-2-enes	2.585	1.506	3.034	1.881	1.387	1.774	2.698	2.641	2.816	2.156	1.739	3	1.56	2.073	2.299	2.417	1.854	2.96	2.587	2.512	2.472
pos_2548	Palustrine	帕劳斯廷	metab_1721	B(ii)	-	-	HMDB0256095	M+	C17H31N3O2	7.7108	-	C10608	pos	-	-	-	-	Phenylpropanoids and polyketides	Macrolactams	309.242	0.174662	0	49.5	1.50574	22324-44-3	Not Available	2.511	2.192	2.56	2.698	2.904	2.927	2.705	2.66	2.728	2.573	2.921	2.738	2.988	2.734	2.67	2.908	2.892	2.656	2.647	2.769	2.797
pos_571	Matairesinol	马泰雷西诺	metab_3252	B(ii)	map01100;map01110;map00999	Metabolic pathways;Biosynthesis of secondary metabolites;Biosynthesis of various plant secondary metabolites	HMDB0035698	M+, M+Na	C20H22O6	5.4749	代谢途径;次级代谢产物的生物合成;多种次生代谢产物的生物合成Ⅰ	C10682	pos	-	-	Metabolism;Metabolism;Metabolism	Global and overview maps;Global and overview maps;Biosynthesis of other secondary metabolites	Lignans, neolignans and related compounds	Furanoid lignans	358.138	0.102572	0	38.4	-9.72884	580-72-3	Tetrahydrofuran lignans	3.105	2.734	2.982	2.819	2.676	3.008	3.043	3.236	3.247	3.158	3.064	3.041	2.669	2.821	2.755	3.041	2.922	3.205	2.991	3.073	3.067
pos_1332	(-)-Wikstromol	（-）-Wikstromol	metab_371	B(ii)	-	-	HMDB0030598	M+H-H2O	C20H22O7	4.5828	-	C10725	pos	-	-	-	-	Lignans, neolignans and related compounds	Furanoid lignans	357.133	0.064528	0	30.2	-0.679805	34444-37-6	Tetrahydrofuran lignans	4.082	4.033	3.755	3.787	3.78	3.91	3.908	3.898	4.16	4.105	4.004	3.897	3.627	3.822	3.914	3.967	3.913	3.836	3.93	3.97	3.985
neg_1281	Ribalinium	利巴林	metab_4040	B(ii)	-	-	HMDB0033346	M+Cl	C16H20NO4+	5.0156	-	C10735	neg	-	-	-	-	Organoheterocyclic compounds	Quinolines and derivatives	325.109	0.0265425	0	38.6	0.460837	6883-22-3	Dihydrofuranoquinolines	2.727	3.057	2.365	2.304	2.538	2.638	2.757	2.608	2.781	2.675	2.557	2.502	2.059	2.626	2.854	2.628	2.812	2.612	2.707	2.727	2.707
pos_3105	2-Hydroxy-6-pentadecylbenzoic acid	2 -羟基- 6 -十五烷基苯甲酸	metab_2341	B(ii)	-	-	LMPK15040002;HMDB0029683	M+H-H2O	C22H36O3	4.6173	-	C10759	pos	-	-	-	-	Benzenoids	Benzene and substituted derivatives	331.26	0.136152	0	35	-9.67875	16611-84-0	Benzoic acids and derivatives	1.941	1.397	1.797	1.263	1.457	1.339	2.237	1.228	2.154	1.741	2.045	1.897	1.271	1.388	1.484	1.965	1.347	1.268	1.594	1.648	1.71
pos_3089	Cyclopamine	环杷明	metab_2322	B(ii)	-	-	HMDB0250664	M+ACN+H	C27H41NO2	4.686	-	C10798	pos	-	-	-	-	Lipids and lipid-like molecules	Steroids and steroid derivatives	453.344	0.0138375	0	79.3	-7.49324	4449-51-8	Steroidal alkaloids	4.194	4.202	4.284	4.324	4.317	4.243	4.223	4.248	4.102	4.324	4.206	4.282	4.403	4.278	4.303	4.213	4.286	4.223	4.252	4.257	4.264
pos_1089	Theogallin	3-邻-没食子酰奎尼酸	metab_100	B(ii)	-	-	HMDB0039287	M+H-2H2O	C14H16O10	1.075	-	C10834	pos	-	-	-	-	Organic oxygen compounds	Organooxygen compounds	309.059	0.180965	0	82	-5.02695	53584-43-3;17365-11-6	Alcohols and polyols	2.624	2.667	2.364	2.613	2.439	2.601	2.565	2.249	2.653	2.559	2.708	2.549	2.589	2.819	2.804	2.726	2.689	2.5	2.556	2.667	2.715
pos_3005	Sesamolinol	芝麻林素酚	metab_2230	B(ii)	-	-	HMDB0033270;HMDB0034119	M+CH3OH+H	C20H20O7	5.1826	-	C10883	pos	-	-	-	-	Benzenoids	Phenols	405.155	0.0961935	0	34.7	2.48506	526-07-8;100016-94-2	Methoxyphenols	2.569	2.726	2.578	2.366	2.186	2.638	2.619	2.712	2.768	2.523	2.581	2.654	2.252	2.345	2.312	2.533	2.519	2.794	2.623	2.55	2.625
pos_1349	(+)-Syringaresinol O-beta-D-glucoside	（+）-丁香树脂醇O-β-D-葡萄糖苷	metab_389	B(i)	-	-	-	M+NH4	C28H36O13	4.6973	-	C10890	pos	-	-	-	-	-	-	598.249	0.146305	56.3	0	-0.416115	7374-79-0	-	2.237	2.149	3.079	1.443	1.719	2.581	2.038	2.502	2.917	2.079	2.435	2.518	1.465	1.485	1.737	2.543	2.471	3.279	2.456	2.583	2.546
neg_1309	Indeloxazine	吲哚嗪	metab_4071	B(ii)	-	-	HMDB0253450	M+K-2H	C14H17NO2	4.8258	-	C10918	neg	-	-	-	-	Benzenoids	Indenes and isoindenes	268.076	0.177645	0	46.7	6.96781	60929-23-9	Not Available	2.259	1.039	2.202	2.043	1.055	1.922	2.51	1.646	1.937	1.785	2.331	1.667	2.493	2.463	2.228	2.155	2.531	1.066	2.1	2.127	1.976
pos_2609	Diethyltoluamide	二乙基甲苯胺	metab_1789	B(i)	-	-	HMDB0250930	M+H	C12H17NO	7.2165	-	C10935	pos	-	-	-	-	Benzenoids	Benzene and substituted derivatives	192.138	0.163858	82	0	0.954806	134-62-3	Toluenes	2.199	2.26	2.301	2.38	2.316	2.122	2.128	2.123	2.129	2.27	2.264	2.224	2.36	2.36	2.35	2.12	2.3	2.231	2.303	2.226	2.163
pos_3301	Fenvalerate	氰戊菊酯	metab_2559	B(ii)	-	-	HMDB0031791	M+H-2H2O	C25H22ClNO3	3.1549	-	C10988	pos	-	-	-	-	Lipids and lipid-like molecules	Fatty Acyls	384.116	0.0694377	0	49.2	1.40119	51630-58-1	Fatty acid esters	3.41	3.575	3.094	3.293	3.22	3.274	3.166	3.03	3.384	3.247	3.443	3.154	3.267	3.444	3.392	3.382	3.399	3.139	3.316	3.33	3.373
pos_3638	Aminomethylphosphonic acid	氨甲基磷酸	metab_2932	B(ii)	-	-	HMDB0240707	2M+H	CH6NO3P	0.9968	-	C11033	pos	-	-	-	-	Organic acids and derivatives	Organic phosphonic acids and derivatives	223.025	0.15183	0	36.5	3.67098	-	Organic phosphonic acids	1.374	1.526	2.099	1.735	1.679	1.8	1.46	1.437	1.751	1.212	2.097	1.864	2.183	2.055	1.975	1.882	1.895	1.344	1.664	1.79	1.712
pos_3266	N-Methyl-2-pyrrolidinone	N-甲基吡咯烷酮	metab_2519	B(i)	-	-	HMDB0002039	M+H	C5H9NO	3.3017	-	C11118	pos	-	-	-	-	Organoheterocyclic compounds	Pyrrolidines	100.075	0.0844141	42.7	0	-2.22991	872-50-4;616-45-5	Pyrrolidones	2.577	2.587	1.952	2.282	2.116	2.56	2.3	2.193	2.612	2.479	2.626	2.149	2.542	2.842	2.421	2.381	2.361	2.17	2.4	2.472	2.431
pos_3500	2-Pyrrolidinone	2-吡咯烷酮	metab_2780	B(ii)	-	-	HMDB0002039	M+H-H2O	C4H7NO	1.1897	-	C11118	pos	-	-	-	-	Organoheterocyclic compounds	Pyrrolidines	68.0492	0.195759	0	87.6	-3.47551	616-45-5	Pyrrolidones	1.317	1.644	1.046	0.3766	1.005	0.9287	0.6962	0.3554	1.476	0.6945	1.775	1.321	1.327	1.396	1.496	1.531	1.279	0.4228	1.16	1.316	1.299
neg_1190	Estrone glucuronide	雌酮葡糖苷酸	metab_3939	B(ii)	-	-	PW_C002143;HMDB0004483	M+K-2H	C24H30O8	5.6764	-	C11133	neg	-	-	-	-	Lipids and lipid-like molecules	Steroids and steroid derivatives	483.14	0.0206242	0	47.2	-5.11186	2479-90-5	Steroidal glycosides	2.353	2.356	2.307	2.172	2.337	2.098	2.383	2.429	2.681	2.211	2.563	2.292	1.988	2.43	2.147	2.658	2.625	2.064	2.432	2.426	2.414
pos_3225	Teniposide	替尼泊甙	metab_2474	B(ii)	-	-	HMDB0014587;PW_C008954	M+H	C32H32O13S	3.4727	-	C11153	pos	-	-	-	-	Mixed metal/non-metal compounds	Metalloid organides	657.169	0.147492	0	31.8	7.62069	29767-20-2	Metalloid oxides	2.038	1.049	3.001	0.9233	0.9384	0.9943	0.9158	2.752	3.394	2.299	1.406	3.074	0.9303	1.04	1.02	1.005	1.002	3.128	2.669	2.551	2.576
pos_1891	Mitoxantrone	胺羟蒽醌	metab_991	B(ii)	-	-	HMDB0015335	M+2Na-H	C22H28N4O6	11.3232	-	C11195	pos	-	-	-	-	Benzenoids	Anthracenes	489.17	0.201877	0	69.2	-4.09092	65271-80-9	Anthraquinones	1.96	1.801	1.999	1.823	1.713	1.832	2.071	2.126	2.262	1.919	2.223	1.987	2.003	2.089	2.194	2.124	2.251	1.796	2.034	2.135	1.965
pos_3142	Dimethyl Phthalate	邻苯二甲酸二甲酯	metab_2382	B(i)	-	-	HMDB0251388;MJDBOTE0001757	M+H	C10H10O4	4.286	-	C11233	pos	-	-	-	-	Benzenoids	Benzene and substituted derivatives	195.065	0.103269	84.8	0	0.715068	131-11-3	Benzoic acids and derivatives	2.105	1.333	1.828	1.937	1.903	2.018	1.988	1.785	2.064	1.871	2.145	2.057	2.092	2.136	1.943	2.135	1.85	1.876	2.058	2.047	1.974
pos_2768	Carboxin	碳毒素	metab_1965	B(ii)	-	-	HMDB0249648	M+H	C12H13NO2S	6.3222	-	C11255	pos	-	-	-	-	Benzenoids	Benzene and substituted derivatives	236.073	0.1195	0	49.7	-5.01813	5234-68-4	Anilides	1.71	1.476	1.711	1.791	1.79	1.717	1.772	1.698	1.687	1.834	1.924	1.81	1.816	1.811	1.744	1.974	1.755	1.721	1.776	1.87	1.866
pos_1246	6-Benzylaminopurine	6-苄基氨基嘌呤	metab_275	B(ii)	-	-	HMDB0039238	M+ACN+H	C12H11N5	3.3482	-	C11263	pos	-	-	-	-	Organoheterocyclic compounds	Imidazopyrimidines	267.135	0.110134	0	33.1	-2.83254	1214-39-7	Purines and purine derivatives	1.603	1.889	1.467	0.8199	1.223	1.508	1.571	1.132	1.339	1.485	1.669	1.709	1.626	1.768	1.746	1.369	1.561	1.485	1.554	1.599	1.648
neg_537	Biapenem	比阿培南	metab_4830	B(ii)	-	-	HMDB0249178	M+Na-2H	C15H18N4O4S	4.8258	-	C11268	neg	-	-	-	-	Organoheterocyclic compounds	Lactams	371.081	0.0169662	0	48.2	2.91363	120410-24-4	Beta lactams	3.425	2.822	3.375	3.197	3.057	3.21	3.513	3.291	3.43	3.349	3.494	3.278	3.513	3.6	3.434	3.453	3.515	3.078	3.385	3.37	3.378
pos_3179	Grepafloxacin	格帕沙星	metab_2422	B(ii)	-	-	HMDB0014509	M+ACN+Na	C19H22FN3O3	3.9112	-	C11368	pos	-	-	-	-	Organoheterocyclic compounds	Quinolines and derivatives	423.18	0.0348635	0	33.9	-0.270416	119914-60-2	Quinoline carboxylic acids	2.876	2.965	2.434	2.29	2.257	2.391	2.21	1.523	2.443	2.315	2.728	2.381	2.422	2.957	2.82	2.671	2.717	2.244	2.608	2.581	2.583
pos_1235	Deoxyloganic acid	脱氧马钱子酸	metab_263	B(ii)	-	-	HMDB0037028	M+NH4	C16H24O9	3.1549	-	C11647	pos	-	-	-	-	Lipids and lipid-like molecules	Prenol lipids	378.175	0.0925801	0	66.6	-3.37118	92842-56-3	Terpene glycosides	1.192	0.9099	1.099	0.4855	0.4971	0.9838	1.351	0.6025	1.447	1.696	1.346	1.416	1.165	1.421	1.4	1.278	1.131	0.9262	1.118	1.14	1.19
pos_3259	Dialdehyde	二醛	metab_2511	B(ii)	map00901	Indole alkaloid biosynthesis	HMDB0251125	M+2Na-H	C21H24N2O4	3.3017	吲哚生物碱生物合成	C11678	pos	-	-	Metabolism	Biosynthesis of other secondary metabolites	Alkaloids and derivatives	Harmala alkaloids	413.143	0.0425642	0	52.3	-5.73176	85955-83-5	Not Available	2.19	2.308	1.841	1.912	1.902	1.946	1.95	1.831	2.222	2.055	2.191	1.906	1.931	2.262	2.05	2.074	1.991	1.869	2.055	2.043	2.078
neg_544	Levonordefrin	左旋诺德芬	metab_5344	B(ii)	-	-	HMDB0015652;HMDB0002832	M-H2O-H	C9H13NO3	4.8928	-	C11768;C17925	neg	-	-	-	-	Benzenoids	Benzene and substituted derivatives	164.073	0.1942	0	35.4	5.13603	829-74-3;6539-57-7	Phenylpropanes	1.768	1.408	2.231	2.057	1.549	1.858	1.712	1.354	2.165	1.804	2.454	1.763	2.136	2.331	2.134	2.067	1.996	1.963	1.796	1.956	1.851
pos_3376	5-Hydroxyisourate	5 -羟基异亮氨酸	metab_2641	B(ii)	map01100;map00230	Metabolic pathways;Purine metabolism	HMDB0030097	M+CH3OH+H	C5H4N4O4	2.1235	代谢途径;嘌呤代谢	C11821	pos	-	-	Metabolism;Metabolism	Global and overview maps;Nucleotide metabolism	Organoheterocyclic compounds	Imidazopyrimidines	217.056	0.0758813	0	35.2	-3.39438	151359-24-9	Purines and purine derivatives	1.745	1.526	1.518	1.751	0.8728	1.449	0.6443	1.476	2.201	2.462	2.176	1.963	1.037	1.818	2.198	2.078	2.131	1.125	1.958	2.024	1.994
pos_3020	Gibberellin A8-catabolite	-	metab_2247	B(ii)	map00904	Diterpenoid biosynthesis	LMPR0104170027;HMDB0304364	M+H-2H2O	C19H22O7	5.0553	二萜生物合成	C11870	pos	-	-	Metabolism	Metabolism of terpenoids and polyketides	Lipids and lipid-like molecules	Prenol lipids	327.123	0.14233	0	41.4	1.4518	78791-79-4	Diterpenoids	2.869	3.219	2.556	2.545	2.7	2.9	2.817	2.747	3.031	2.796	2.858	2.69	2.497	2.815	2.984	2.871	2.936	2.719	2.792	2.908	2.9
pos_3073	Ansamitocin P-3	安萨米霉素P-3	metab_2305	B(ii)	map01110	Biosynthesis of secondary metabolites	HMDB0248452	M+Na	C32H43ClN2O9	4.7893	次级代谢产物的生物合成	C12045	pos	-	-	Metabolism	Global and overview maps	Phenylpropanoids and polyketides	Macrolactams	657.249	0.0569578	0	45.9	-8.95401	66584-72-3	Not Available	2.74	2.679	2.609	2.194	1.745	2.75	2.538	2.49	2.828	2.312	2.578	2.502	1.834	2.323	2.117	2.53	2.39	2.682	2.462	2.5	2.455
pos_616	1-Cyclohexene-1-carboxylic acid	1-环己烯-1-羧酸	metab_3302	B(ii)	-	-	HMDB0243852	M+H-H2O, M+H	C7H10O2	5.8435	-	C12101	pos	-	-	-	-	Organic acids and derivatives	Carboxylic acids and derivatives	127.075	0.0577999	0	63	-2.59721	636-82-8	Carboxylic acids	3.042	3.073	2.284	2.714	2.814	2.956	2.852	2.457	2.83	2.778	3.034	2.372	2.522	2.81	2.987	3.018	2.918	2.841	2.876	2.861	2.909
pos_1388	Petunidin 3-glucoside	哌替啶3-葡萄糖苷	metab_432	B(i)	map00942	Anthocyanin biosynthesis	LMPK12010349;HMDB0038097	M+H	C22H22O12	5.2293	花青素生物合成	C12139	pos	-	-	Metabolism	Biosynthesis of other secondary metabolites	Phenylpropanoids and polyketides	Flavonoids	479.12	0.0808013	73.6	0	2.97223	6988-81-4;71991-88-3;6988-81-4	Flavonoid glycosides	1.874	0.03705	2.508	0.02713	0.02819	0.0324	0.02662	2.526	2.937	1.984	1.837	2.495	0.02761	1.358	0.03449	0.2325	0.08141	2.584	2.063	2.132	2.091
pos_1364	Oenin	锦葵花素-3-葡萄糖苷	metab_406	B(i)	map00942	Anthocyanin biosynthesis	HMDB0038010;LMPK12010372;HMDB0030777	M+H	C23H24O12	4.8933	花青素生物合成	C12140	pos	-	-	Metabolism	Biosynthesis of other secondary metabolites	Phenylpropanoids and polyketides	Flavonoids	493.136	0.201325	86.2	0	3.09372	7228-78-6;30113-37-2	Flavonoid glycosides	2.006	1.333	1.254	1.2	1.216	1.275	1.438	2.429	2.573	1.916	1.899	2.107	1.208	1.324	1.302	1.729	1.283	2.923	1.85	2.02	1.997
neg_686	N-Acetyl-1-aspartylglutamic acid	N -乙酰- 1 -天冬氨酰谷氨酸	metab_4992	B(ii)	map01100;map00250	Metabolic pathways;Alanine, aspartate and glutamate metabolism	HMDB0001067;HMDB0255414	2M+FA-H	C11H16N2O8	6.3032	代谢途径;丙氨酸、天冬氨酸和谷氨酸代谢	C12270	neg	-	-	Metabolism;Metabolism	Global and overview maps;Amino acid metabolism	Organic acids and derivatives	Carboxylic acids and derivatives	653.176	0.0888001	0	34	-6.1808	3106-85-2	Amino acids, peptides, and analogues	2.203	2.025	1.584	1.904	1.916	2.012	1.872	1.864	2.376	1.726	2.058	1.509	1.488	1.986	1.875	2.056	1.929	1.943	2.035	1.99	1.96
pos_2474	(+/-)-Citronellyl acetate	-	metab_1639	B(ii)	-	-	HMDB0034844;HMDB0034160	M+H	C12H22O2	8.3616	-	C12298	pos	-	-	-	-	Lipids and lipid-like molecules	Fatty Acyls	199.169	0.0119834	0	38.4	0.936803	150-84-5	Fatty alcohol esters	2.97	2.838	2.964	3.085	3.104	3.23	2.955	2.963	3.219	3.005	3.18	2.952	3.186	3.143	3.037	2.956	3.022	2.932	3.041	3.034	3.031
pos_2512	Cinnamyl acetate	乙酸肉桂酯	metab_1682	B(ii)	-	-	HMDB0029699	M+H	C11H12O2	8.0192	-	C12299	pos	-	-	-	-	Benzenoids	Benzene and substituted derivatives	177.09	0.0602483	0	96.8	-7.62372	103-54-8;21040-45-9	Styrenes	1.171	1.651	1.286	0.8835	1.127	1.271	1.238	1.228	1.026	1.239	1.132	1.278	1.302	1.136	1.214	1.243	1.312	1.259	1.33	1.288	1.334
pos_3169	Methyl 2-hydroxybenzoate	2-羟基苯甲酸甲酯	metab_2411	B(ii)	-	-	HMDB0029817;HMDB0034172	2M+ACN+Na	C8H8O3	3.9907	-	C12305	pos	-	-	-	-	Benzenoids	Benzene and substituted derivatives	368.111	0.121551	0	65.6	0.678152	118-61-6;119-36-8	Benzoic acids and derivatives	2.158	2.497	0.6464	1.487	0.7338	1.069	0.678	0.6554	1.08	0.7606	1.207	0.6992	0.691	2.284	1.591	1.416	0.7559	1.472	1.564	1.463	1.541
pos_2381	Allyl 3-cyclohexylpropionate	3-环己基丙酸烯丙酯	metab_1536	B(ii)	-	-	HMDB0040206;LMFA07010775	M+H-2H2O	C12H20O2	8.9462	-	C12306	pos	-	-	-	-	Lipids and lipid-like molecules	Fatty Acyls	161.132	0.136183	0	95	-2.03959	2705-87-5	Fatty acid esters	2.253	2.657	0.9413	2.341	2.121	2.281	1.388	0.4867	2.657	1.776	2.517	0.3014	2.104	2.555	2.046	1.944	2.111	0.9424	2.197	2.281	2.315
neg_1426	13-Dihydrodaunorubicin	13 -二氢柔红霉素	metab_5336	B(ii)	map01110	Biosynthesis of secondary metabolites	LMPK13050004;HMDB0244506	M+Na-2H	C27H31NO10	3.385	次级代谢产物的生物合成	C12430	neg	-	-	Metabolism	Global and overview maps	Phenylpropanoids and polyketides	Anthracyclines	550.171	0.113448	0	60.3	2.81535	28008-55-1	Not Available	0.4671	0.3909	1.565	0.4248	0.8213	1.262	1.931	1.813	1.76	1.168	1.694	1.701	0.9304	0.5283	1.413	1.829	1.189	1.906	1.604	1.509	1.578
pos_2581	Eplerenone	伊普利酮	metab_1758	B(ii)	-	-	HMDB0014838;PW_C009176;MJDBOTE0000877	M+NH4	C24H30O6	7.3905	-	C12512	pos	-	-	-	-	Lipids and lipid-like molecules	Steroids and steroid derivatives	432.239	0.206753	0	49.9	1.9186	107724-20-9	Steroid lactones	3.618	3.67	3.916	3.886	3.892	3.259	3.41	3.495	3.32	3.828	3.681	3.833	3.889	3.8	3.76	3.775	3.813	3.823	3.744	3.652	3.832
pos_3472	Isowertin 2''-rhamnoside	异荭草素2″-鼠李糖苷	metab_2748	B(ii)	map00944	Flavone and flavonol biosynthesis	HMDB0037417	2M+3H2O+2H	C28H32O14	1.2248	黄酮和黄酮醇生物合成	C12629	pos	-	-	Metabolism	Biosynthesis of other secondary metabolites	Phenylpropanoids and polyketides	Flavonoids	606.195	0.0403036	0	52.3	6.74043	64821-00-7	Flavonoid glycosides	0.9333	0.5553	2.324	0.4587	1.434	0.5124	1.581	2.315	2.177	0.959	2.611	2.79	1.906	0.5484	2.402	2.584	1.439	1.636	1.995	2.011	1.976
pos_3189	Luteolin 7-O-[beta-D-glucuronosyl-(1->2)-beta-D-glucuronide]	木犀草素7-O-[β-D-葡萄糖醛酸-（1->2）-β-D-葡萄糖醛酸]	metab_2433	B(ii)	map00944	Flavone and flavonol biosynthesis	HMDB0060297	M+NH4	C27H26O18	3.832	黄酮和黄酮醇生物合成	C12632	pos	-	-	Metabolism	Biosynthesis of other secondary metabolites	Benzenoids	Benzene and substituted derivatives	656.14	0.0322339	0	38.7	-8.68969	-	Benzonitriles	2.744	2.775	2.441	2.699	2.014	2.046	0.9763	0.9506	2.627	2.676	2.861	2.006	2.018	2.596	2.163	1.421	2.074	1.143	2.485	2.482	2.507
neg_1104	Cyclacillin	环唑西林	metab_3845	B(ii)	-	-	HMDB0015135	2M+Hac-H	C15H23N3O4S	6.2585	-	C12766	neg	-	-	-	-	Organoheterocyclic compounds	Lactams	741.297	0.156657	0	30.3	2.41054	3485-14-1	Beta lactams	2.229	2.098	0.733	1.375	0.5421	2.422	1.836	1.52	0.6242	0.5756	0.6661	0.5753	0.4935	0.9843	1.889	0.8505	2.056	1.837	1.782	1.675	1.668
pos_1417	Proscillaridin	前海葱甙原	metab_465	B(ii)	-	-	HMDB0256851	M+H-H2O	C30H42O8	5.6287	-	C12816	pos	Steroids	24-Carbon atoms	-	-	Lipids and lipid-like molecules	Steroids and steroid derivatives	513.283	0.0671656	0	41.1	-3.09246	466-06-8	Steroid lactones	3.571	4.047	2.552	3.233	3.351	3.336	2.994	2.529	3.17	2.99	3.334	2.64	3.051	3.626	3.518	3.308	3.368	2.657	3.329	3.378	3.382
pos_26	Lentinan	香菇多糖	metab_1778	B(ii)	-	-	HMDB0254010	M+Na, M+K, M+NH4, M+, M+H+Na	C42H72O36	2.6126	-	C13156	pos	-	-	-	-	Organic oxygen compounds	Organooxygen compounds	1191.35	0.136248	0	38	5.79411	37339-90-5	Carbohydrates and carbohydrate conjugates	4.009	3.794	3.923	3.724	3.588	4.058	4.141	3.914	4.203	4.096	4.015	3.961	3.669	3.742	3.746	4.046	4.03	4.295	3.959	4.06	4.071
pos_956	Lubiprostone	卢比普罗斯通	metab_3679	B(ii)	-	-	HMDB0015180	M+H-H2O, M+H	C20H32F2O5	10.1776	-	C13707	pos	-	-	-	-	Lipids and lipid-like molecules	Fatty Acyls	373.22	0.108368	0	82.6	3.6755	136790-76-6;333963-40-9	Eicosanoids	2.227	2.398	2.245	2.454	2.381	2.298	2.214	2.306	2.22	2.302	2.257	2.407	2.393	2.381	2.407	2.285	2.324	2.195	2.31	2.274	2.366
pos_2750	10,10-Bis(pyridin-4-ylmethyl)anthracen-9-one	10,10-双（吡啶-4-基甲基）蒽-9-酮	metab_1946	B(ii)	-	-	HMDB0259926	M+Na	C26H20N2O	6.4528	-	C13779	pos	-	-	-	-	Benzenoids	Anthracenes	399.145	0.100433	0	30.4	-5.61843	-	Not Available	2.672	2.565	2.32	2.407	2.515	2.397	2.612	2.492	2.853	2.742	2.739	2.588	2.446	2.697	2.919	2.838	2.774	2.43	2.62	2.685	2.706
pos_222	Linoleoyl Ethanolamide	亚油酰乙醇胺	metab_1357	B(i)	-	-	HMDB0012252;HMDB0013624	M+H, M+K, M+Na	C20H37NO2	9.2037	-	C13828	pos	-	-	-	-	Organic nitrogen compounds	Organonitrogen compounds	324.29	0.0172228	32	0	1.45837	68171-52-8	Amines	3.212	3.569	2.925	3.112	3.203	3.339	3.111	2.938	3.418	3.151	3.463	2.984	3.165	3.282	3.394	3.29	3.259	2.84	3.239	3.237	3.251
pos_1673	Aurin	奥林	metab_749	B(ii)	-	-	HMDB0248730	M+CH3OH+H	C19H14O3	8.2932	-	C14213	pos	-	-	-	-	Benzenoids	Benzene and substituted derivatives	323.127	0.0367459	0	61.1	-1.10435	603-45-2	Diphenylmethanes	3.593	3.843	2.635	3.06	2.971	2.911	3.5	3.061	3.337	3.21	3.148	2.784	2.507	3.439	3.504	3.472	3.355	2.708	3.344	3.354	3.375
pos_2437	Dibutyl phthalate	酞酸二丁酯	metab_1598	B(ii)	-	-	HMDB0033244	2M+Na	C16H22O4	8.6347	-	C14214	pos	-	-	-	-	Benzenoids	Benzene and substituted derivatives	579.294	0.153623	0	48.2	2.10528	84-74-2	Benzoic acids and derivatives	2.54	2.538	2.817	2.453	2.352	2.411	2.575	2.577	2.608	2.695	2.828	2.6	2.526	2.475	2.52	2.497	2.588	2.577	2.133	2.141	2.248
pos_1922	Dioctyl Phthalate	邻苯二甲酸二辛酯	metab_1026	B(i)	-	-	HMDB0251427;HMDB0249243	M+H	C24H38O4	11.3906	-	C14227;C03690	pos	-	-	-	-	Benzenoids	Benzene and substituted derivatives	391.285	0.107818	95.5	0	2.98075	117-81-7	Benzoic acids and derivatives	2.149	2.247	2.465	2.071	2.406	2.606	2.409	2.616	2.516	2.61	2.679	2.464	2.589	2.499	2.326	2.446	2.532	2.278	2.454	2.366	2.446
pos_1845	(R)-1-Octen-3-ol	（R） -1-辛烯-3-醇	metab_940	B(ii)	-	-	HMDB0031299	M+H-H2O	C8H16O	10.2666	-	C14272	pos	-	-	-	-	Lipids and lipid-like molecules	Fatty Acyls	111.117	0.153227	0	49.3	0.393846	-	Fatty alcohols	3.019	2.995	2.876	3.003	2.991	3.184	3.13	3.103	2.846	3.17	3.045	3.198	3.339	3.225	3.109	3.027	3.257	3.051	3.063	2.962	3.094
pos_1639	4-Propylphenol	4-丙基苯酚	metab_711	B(ii)	-	-	HMDB0032625	M+H-H2O	C9H12O	7.8134	-	C14311	pos	-	-	-	-	Benzenoids	Benzene and substituted derivatives	119.085	0.0491518	0	67.2	-0.705364	645-56-7	Phenylpropanes	2.774	2.857	2.955	2.96	2.992	2.842	2.823	2.737	2.813	2.9	2.866	2.857	2.934	2.868	2.825	2.863	2.854	2.847	2.892	2.861	2.852
pos_2079	DEA	-	metab_1200	B(i)	map00564	Glycerophospholipid metabolism	HMDB0041878;HMDB0013626;HMDB0032782;HMDB0004437;HMDB0029895	M+H	C4H11N	11.0788	甘油磷脂代谢	C14422;C06772;C13829;C11001	pos	-	-	Metabolism	Lipid metabolism	Organic nitrogen compounds	Organonitrogen compounds	74.0964	0.163585	43.4	0	-0.233908	111-42-2;71247-25-1;150314-35-5;579-66-8;23918-98-1	Amines	2.823	3.115	3.3	3.005	3.194	3.144	2.821	3.077	2.919	3.03	3.057	3.157	3.039	3.067	3.12	3.056	3.19	3.033	3.053	3.186	3.086
pos_2258	Tridecanol	十三醇	metab_1399	B(ii)	-	-	HMDB0013316	M+ACN+H	C13H28O	9.2968	-	C14509	pos	-	-	-	-	Lipids and lipid-like molecules	Fatty Acyls	242.248	0.204419	0	67.4	-0.127476	-	Fatty alcohols	2.776	2.764	2.85	3.029	3.095	2.824	2.943	2.859	2.892	2.798	2.747	2.832	2.98	2.756	2.753	2.874	2.938	2.813	3.041	2.909	2.882
neg_1106	1-Methyl-2-nitro-1-nitrosoguanidine	1 -甲基- 2 -硝基- 1 -亚硝基胍	metab_3847	B(ii)	-	-	HMDB0243924	2M+Hac-H	C2H5N5O3	6.2139	-	C14592	neg	-	-	-	-	Organic nitrogen compounds	Organonitrogen compounds	353.095	0.0597232	0	57.9	8.77277	-	Guanidines	1.171	0.7752	0.3298	1.095	1.112	1.311	1.116	1.24	1.27	1.501	1.278	1.247	0.8193	0.3487	1.301	1.382	1.215	0.8094	1.335	1.383	1.373
pos_2486	1-Nonanol	正壬醛	metab_1652	B(ii)	-	-	HMDB0031265;LMFA05000092	M+ACN+H	C9H20O	8.2819	-	C14696	pos	-	-	-	-	Lipids and lipid-like molecules	Fatty Acyls	186.186	0.0607655	0	43.4	1.92663	143-08-8	Fatty alcohols	2.336	2.176	2.464	2.533	2.529	2.365	2.359	2.388	2.162	2.262	2.212	2.329	2.43	2.317	2.176	2.367	2.471	2.352	2.362	2.414	2.397
neg_942	9-Hydroxy-10,12-Octadecadienoic Acid	9 -羟基- 10，12 -十八碳二烯酸	metab_5276	B(i)	map00591	Linoleic acid metabolism	HMDB0062652;LMFA02000318;HMDB0004670	M-H2O-H	C18H32O3	9.3805	亚油酸	C14767	neg	-	-	Metabolism	Lipid metabolism	Lipids and lipid-like molecules	Fatty Acyls	277.218	0.095756	47.9	0	2.58714	98524-19-7;73543-67-6	Lineolic acids and derivatives	2.986	3.182	2.759	3.014	2.972	2.904	3.022	2.862	3.153	3.032	3.063	2.829	2.781	3.112	3.21	2.977	3.135	2.783	2.993	3.075	3.026
neg_971	9(S)-HODE	9（S）-HODE	metab_5306	B(i)	map00591	Linoleic acid metabolism	HMDB0004670	M-H	C18H32O3	8.6416	亚油酸	C14767	neg	-	-	Metabolism	Lipid metabolism	Lipids and lipid-like molecules	Fatty Acyls	295.228	0.0267551	55.1	0	2.10286	73543-67-6	Lineolic acids and derivatives	3.632	3.404	3.655	3.691	3.589	3.664	3.822	3.719	3.714	3.684	3.721	3.686	3.66	3.699	3.637	3.65	3.905	3.66	3.694	3.671	3.678
pos_1400	1,2-Dihydroxy-3,4-epoxy-1,2,3,4-tetrahydronaphthalene	1,2-二羟基-3,4-环氧-1,2,3,4-四氢萘	metab_447	B(ii)	-	-	HMDB0062273	M+H	C10H10O3	5.3689	-	C14784	pos	-	-	-	-	Benzenoids	Tetralins	179.07	0.13158	0	57.9	0.271223	75947-54-5	Not Available	2.36	1.69	2.37	2.252	2.303	2.448	2.318	2.474	2.712	2.415	2.582	2.419	2.356	2.225	2.224	2.576	2.367	2.389	2.327	2.44	2.409
neg_741	9,10,13-TriHOME	9,10,13-TriHOME	metab_5054	B(ii)	map00591	Linoleic acid metabolism	HMDB0004710	M-H	C18H34O5	7.0983	亚油酸	C14835	neg	-	-	Metabolism	Lipid metabolism	Lipids and lipid-like molecules	Fatty Acyls	329.234	0.020863	0	41.1	3.24371	29907-57-1	Fatty acids and conjugates	4.619	4.346	5.061	4.922	4.989	4.916	5.041	5.138	4.781	5.004	4.911	5.133	5.131	4.8	5.051	5.023	5.108	4.95	4.963	4.981	4.969
neg_1441	Tropolone	特罗波隆	metab_4217	B(ii)	-	-	HMDB0259299	M-H	C7H6O2	3.2521	-	C15474	neg	-	-	-	-	Hydrocarbon derivatives	Tropones	121.03	0.172126	0	89.8	5.73109	533-75-5	Tropolones	2.883	2.644	2.64	2.915	2.768	2.549	2.599	2.481	2.615	2.834	2.726	2.567	2.946	2.915	2.914	2.861	2.754	2.287	2.809	2.787	2.663
pos_2899	Glyceollin III	大豆抗毒素Ⅲ	metab_2110	B(ii)	map00943	Isoflavonoid biosynthesis	LMPK12070109;HMDB0034041	M+H-H2O	C20H18O5	5.7717	异黄酮生物合成	C15511	pos	-	-	Metabolism	Biosynthesis of other secondary metabolites	Phenylpropanoids and polyketides	Isoflavonoids	321.112	0.139109	0	95.8	-1.21769	61080-23-7	Furanoisoflavonoids	1.825	1.804	1.923	1.784	1.282	2.008	1.772	1.93	1.975	1.775	1.923	1.896	1.73	1.819	1.928	2.104	1.945	1.878	1.876	1.885	1.98
pos_2411	Flavan-3-ol	黄烷-3-醇	metab_1570	B(ii)	-	-	HMDB0252291	M+	C15H14O2	8.7495	-	C15598	pos	-	-	-	-	Phenylpropanoids and polyketides	Flavonoids	226.098	0.212429	0	79.2	-8.25355	-	Flavans	1.639	2.77	0.155	0.8487	1.526	1.3	0.143	0.3316	0.8442	0.2091	0.2039	0.08758	0.1363	1.55	1.244	0.03656	0.8711	0.4279	1.299	1.443	1.477
neg_443	Senecionine N-oxide	千里光碱N -氧化物	metab_4726	B(ii)	map00960;map01110	Tropane, piperidine and pyridine alkaloid biosynthesis;Biosynthesis of secondary metabolites	HMDB0258230	M+K-2H	C18H25NO6	3.3407	托烷、哌啶和吡啶生物碱的生物合成;次级代谢产物的生物合成	C15612	neg	-	-	Metabolism;Metabolism	Biosynthesis of other secondary metabolites;Global and overview maps	Alkaloids and derivatives	Not Available	388.117	0.288796	0	44.5	1.92691	-	Not Available	1.017	0.3609	1.784	0.7233	0.5156	1.182	2.045	1.782	2.085	0.6896	1.908	1.972	1.291	1.013	1.582	2.112	0.3928	2.051	1.753	1.625	1.507
neg_990	4a-Methylzymosterol-4-carboxylic acid	4a -甲基麦角甾醇- 4 -羧酸	metab_5337	B(ii)	map01100;map01110;map00100	Metabolic pathways;Biosynthesis of secondary metabolites;Steroid biosynthesis	PW_C003009;HMDB0006927;HMDB0001181	M+K-2H	C29H46O3	7.8899	代谢途径;次级代谢产物的生物合成;类固醇生物合成	C15808	neg	-	-	Metabolism;Metabolism;Metabolism	Global and overview maps;Global and overview maps;Lipid metabolism	Organoheterocyclic compounds	Pyridines and derivatives	479.294	0.0820534	0	37.3	1.18186	-	Pyridinecarboxylic acids and derivatives	3.276	3.022	3.636	3.532	3.455	3.433	3.571	3.611	3.157	3.655	3.244	3.643	3.584	3.429	3.529	3.413	3.401	3.586	3.519	3.449	3.476
pos_3166	Medicocarpin	麦地卡宾	metab_2408	B(ii)	map00943;map01110	Isoflavonoid biosynthesis;Biosynthesis of secondary metabolites	HMDB0033855	M+H	C22H24O9	4.0362	异黄酮生物合成;次级代谢产物的生物合成	C16223	pos	-	-	Metabolism;Metabolism	Biosynthesis of other secondary metabolites;Global and overview maps	Phenylpropanoids and polyketides	Isoflavonoids	433.15	0.042872	0	64.2	1.58343	52766-70-8	Furanoisoflavonoids	2.538	0.8838	3.28	2.664	2.171	2.893	2.699	3.108	3.055	2.926	2.594	3.098	2.388	2.381	2.335	2.77	2.799	3.021	2.788	2.815	2.824
pos_2341	Scymnol	鲨胆甾醇	metab_1492	B(ii)	-	-	LMST04030173;HMDB0258186	M+CH3OH+H	C27H48O6	9.0054	-	C16260	pos	-	-	-	-	Lipids and lipid-like molecules	Steroids and steroid derivatives	501.379	0.0725249	0	40.8	0.624818	6785-34-8	Bile acids, alcohols and derivatives	3.55	3.391	3.015	3.092	3.182	3.224	3.367	2.944	3.453	3.46	3.338	3.134	3.042	3.315	3.355	3.297	3.322	3.162	3.303	3.308	3.359
neg_643	Cyclopropanecarboxylic acid	环丙甲酸	metab_4946	B(ii)	-	-	HMDB0250675	2M-H	C4H6O2	5.7774	-	C16267	neg	-	-	-	-	Organic acids and derivatives	Carboxylic acids and derivatives	171.067	0.0125081	0	84.5	4.53992	-	Cyclopropanecarboxylic acids and derivatives	4.214	4.142	3.781	4.013	4.057	4.255	4.244	3.919	4.127	4.094	4.219	3.832	3.852	4.031	4.193	4.247	4.138	4.144	4.124	4.133	4.133
pos_2646	Traumatic acid	愈伤酸	metab_1830	B(ii)	map00592;map01110	alpha-Linolenic acid metabolism;Biosynthesis of secondary metabolites	HMDB0000933;LMFA01170002	M+H-H2O	C12H20O4	7.0191	α-亚麻酸代谢;次级代谢产物的生物合成	C16308	pos	-	-	Metabolism;Metabolism	Lipid metabolism;Global and overview maps	Lipids and lipid-like molecules	Fatty Acyls	211.133	0.175631	0	54.8	0.0129374	6402-36-4	Fatty acids and conjugates	1.419	1.758	0.4816	0.8372	1.002	0.8038	0.7034	0.4894	0.9327	0.5821	1.126	0.6842	1.172	1.817	1.809	1.398	1.557	0.5186	1.319	1.2	1.199
neg_987	9(S)-HpOTrE	-	metab_5323	B(i)	map00592;map01110	alpha-Linolenic acid metabolism;Biosynthesis of secondary metabolites	-	M-H	C18H30O4	8.0693	α-亚麻酸代谢;次级代谢产物的生物合成	C16321	neg	-	-	Metabolism;Metabolism	Lipid metabolism;Global and overview maps	-	-	309.208	0.0392692	62.8	0	2.20704	111004-08-1	-	3.829	3.692	3.978	4.084	4	3.998	3.971	3.964	3.764	4.1	3.804	3.954	4.071	4.035	4.146	3.955	4.251	3.857	3.946	3.976	3.976
pos_722	9-Oxo-nonanoic acid	9 -氧代壬酸	metab_3420	B(ii)	map00592;map01110	alpha-Linolenic acid metabolism;Biosynthesis of secondary metabolites	LMFA01060160;HMDB0094711	M+H-H2O, M+H	C9H16O3	7.1703	α-亚麻酸代谢;次级代谢产物的生物合成	C16322	pos	-	-	Metabolism;Metabolism	Lipid metabolism;Global and overview maps	Lipids and lipid-like molecules	Fatty Acyls	173.117	0.0771652	0	36.4	0.837705	-	Fatty acids and conjugates	2.563	2.228	2.906	2.845	2.981	2.781	2.724	2.858	2.685	2.784	2.765	2.779	2.92	2.608	2.669	2.786	2.998	2.686	2.811	2.745	2.773
pos_961	(3Z,6Z)-3,6-Nonadienal	（3Z，6Z）-3,6-壬二烯醛	metab_3685	B(ii)	map00592;map01110	alpha-Linolenic acid metabolism;Biosynthesis of secondary metabolites	HMDB0031152	M+H-H2O, M+H	C9H14O	10.2223	α-亚麻酸代谢;次级代谢产物的生物合成	C16323	pos	-	-	Metabolism;Metabolism	Lipid metabolism;Global and overview maps	Organic oxygen compounds	Organooxygen compounds	139.111	0.0691739	0	57.2	-2.77576	21944-83-2	Carbonyl compounds	4.42	4.425	4.505	4.502	4.531	4.597	4.493	4.475	4.307	4.5	4.377	4.503	4.605	4.501	4.445	4.395	4.484	4.396	4.464	4.423	4.406
neg_773	9(S)-HOTrE	9（S）-热	metab_5089	B(i)	map00592	alpha-Linolenic acid metabolism	HMDB0247705	M-H	C18H30O3	8.3956	α-亚麻酸代谢	C16326	neg	-	-	Metabolism	Lipid metabolism	Lipids and lipid-like molecules	Fatty Acyls	293.213	0.0149834	61.7	0	2.92519	-	Lineolic acids and derivatives	2.836	2.757	3.135	3.135	3.073	3.043	3.029	3.141	2.973	3.258	3.018	3.225	3.155	3.051	3.057	2.947	3.29	3.035	3.028	3.034	3.021
pos_1275	Trans-zeatin riboside	-	metab_307	B(ii)	map01110;map00908	Biosynthesis of secondary metabolites;Zeatin biosynthesis	HMDB0030388;HMDB0304506	M+H	C15H21N5O5	3.6855	次级代谢产物的生物合成;玉米素生物合成	C16431	pos	-	-	Metabolism;Metabolism	Global and overview maps;Metabolism of terpenoids and polyketides	Nucleosides, nucleotides, and analogues	Purine nucleosides	352.16	0.0972692	0	34.4	-3.5243	6025-53-2	Not Available	1.767	1.934	1.675	1.548	1.465	1.822	1.761	1.783	1.763	1.83	2.045	1.869	1.881	2.01	2.043	1.882	1.927	1.826	1.835	1.913	1.904
pos_1353	Dihydrozeatin-O-glucoside	二羟玉米素- O -葡萄糖苷	metab_394	B(ii)	map01110;map00908	Biosynthesis of secondary metabolites;Zeatin biosynthesis	HMDB0012214	M+H-H2O	C16H25N5O6	4.7663	次级代谢产物的生物合成;玉米素生物合成	C16448	pos	-	-	Metabolism;Metabolism	Global and overview maps;Metabolism of terpenoids and polyketides	Lipids and lipid-like molecules	Fatty Acyls	366.178	0.0640606	0	43.3	1.80358	62512-96-3	Fatty acyl glycosides	3.358	2.9	3.175	3.32	3.59	3.43	3.195	2.922	3.63	2.938	3.611	3.24	3.557	3.492	3.454	3.498	3.059	3.175	3.331	3.367	3.386
pos_2145	7,10,13,16,19-Docosapentaenoic acid	7，10，13，16，19 -二十二碳五烯酸	metab_1274	B(ii)	map01040	Biosynthesis of unsaturated fatty acids	HMDB0247288;HMDB0246621;LMFA01030184;HMDB0006528	M+CH3OH+H	C22H34O2	9.987	不饱和脂肪酸的生物合成	C16513	pos	-	-	Metabolism	Lipid metabolism	Lipids and lipid-like molecules	Fatty Acyls	363.29	0.256281	0	33.8	1.5586	24880-45-3	Fatty acids and conjugates	2.32	2.557	0.7404	0.6916	0.7054	0.7606	1.778	0.6622	2.605	2.482	1.393	1.658	0.7292	1.099	1.911	0.7665	1.284	1.274	1.782	1.726	1.557
neg_777	Dihomo-alpha-linolenic acid	二高- α -亚麻酸	metab_5093	B(ii)	map01040	Biosynthesis of unsaturated fatty acids	HMDB0060039	M+FA-H	C20H34O2	8.6416	不饱和脂肪酸的生物合成	C16522	neg	-	-	Metabolism	Lipid metabolism	Lipids and lipid-like molecules	Fatty Acyls	351.256	0.0697722	0	56.9	6.17839	17046-59-2	Fatty acids and conjugates	2.113	2.334	1.887	2.09	1.298	1.626	2.155	2.219	2.459	2.868	1.576	2.574	1.893	2.289	2.495	1.812	2.416	2.106	2.374	2.329	2.388
pos_794	Ganosporeric acid A	灵芝孢子酸 A	metab_3499	B(ii)	map01040	Biosynthesis of unsaturated fatty acids	HMDB0033022;LMST01010393	M+NH4, M+Na	C30H38O8	8.4749	不饱和脂肪酸的生物合成	C16526	pos	Lipids	Fatty acids	Metabolism	Lipid metabolism	Lipids and lipid-like molecules	Fatty Acyls	549.247	0.0413383	0	53.1	2.20211	135357-25-4	Fatty acids and conjugates	3.322	3.248	2.634	2.742	2.118	2.499	3.36	2.968	2.787	2.966	2.625	2.48	2.215	3.094	3.265	3.465	3.191	2.544	3.094	3.064	3.096
pos_2291	13,16,19-Docosatrienoic acid	13，16，19 -二十碳三烯酸	metab_1436	B(ii)	-	-	LMFA01030407;HMDB0244522;HMDB0002823	M+NH4	C22H38O2	9.2037	-	C16534	pos	-	-	-	-	Lipids and lipid-like molecules	Fatty Acyls	352.321	0.0398023	0	77.2	-1.01951	28845-86-5	Fatty acids and conjugates	2.685	2.73	2.641	3.251	3.063	2.836	2.541	2.582	3.023	3.012	3.384	2.782	2.97	3.203	3.06	3.213	2.843	2.67	2.956	2.956	2.985
neg_1033	Citalopram propionic acid	西酞普兰丙酸	metab_3766	B(ii)	-	-	PW_C040620;HMDB0060463	2M-H	C18H14FNO3	6.8265	-	C16610	neg	-	-	-	-	Organoheterocyclic compounds	Isocoumarans	621.187	0.157055	0	52.1	4.59409	-	Not Available	2.328	2.391	2.088	2.424	2.55	2.409	1.731	1.956	2.58	2.024	2.702	1.633	2.276	2.414	2.41	2.475	2.239	1.973	2.413	2.304	2.296
pos_1617	5'-Deoxy-5-fluorocytidine	5'-脱氧-5-氟胞苷	metab_687	B(ii)	-	-	HMDB0060405	2M+H	C9H12FN3O4	7.5161	-	C16635	pos	-	-	-	-	Nucleosides, nucleotides, and analogues	5''-deoxyribonucleosides	491.17	0.224733	0	31.8	1.50163	-	Not Available	1.972	1.771	0.8285	1.506	0.6833	0.9163	1.656	1.561	1.975	1.702	1.922	1.562	0.6348	1.66	1.908	2.055	2.024	1.449	1.603	1.776	1.788
neg_1077	3-Hydroxyvalproic acid	3 -羟基丙戊酸	metab_3814	B(ii)	-	-	PW_C008641;HMDB0013899;LMFA01050494	M-H2O-H	C8H16O3	6.4695	-	C16651	neg	-	-	-	-	Lipids and lipid-like molecules	Fatty Acyls	141.093	0.0541781	0	96.7	4.12061	58888-84-9	Fatty acids and conjugates	2.786	2.747	2.285	2.775	2.806	2.876	2.766	2.758	2.86	2.648	2.831	2.299	2.317	2.595	2.832	2.897	2.642	2.763	2.767	2.744	2.791
neg_1116	2-n-Propyl-4-oxopentanoic acid	2-正丙基-4-氧戊二酸	metab_3858	B(ii)	-	-	HMDB0060683;PW_C040565	M+FA-H	C8H14O3	6.1029	-	C16655	neg	-	-	-	-	Organic acids and derivatives	Keto acids and derivatives	203.093	0.145055	0	83.8	2.48229	-	Gamma-keto acids and derivatives	2.182	1.641	2.029	2.4	2.495	2.254	2.048	2.044	2.348	2.207	2.402	1.858	2.014	1.985	2.442	2.558	2.222	2.034	2.283	2.386	2.404
pos_3251	2-O-(6-Phospho-alpha-mannosyl)-D-glycerate	2-O-（6-磷酸-α-甘露糖基）-D-甘油酸酯	metab_2503	B(ii)	-	-	HMDB0012152	M+H	C9H17O12P	3.3132	-	C16699	pos	-	-	-	-	Organic oxygen compounds	Organooxygen compounds	349.055	0.202389	0	95.4	6.56746	-	Carbohydrates and carbohydrate conjugates	1.643	0.9123	1.117	1.239	1.16	1	0.7846	1.697	2.21	1.409	1.595	1.395	1.373	1.74	1.491	1.476	1.253	2.064	1.544	1.718	1.637
pos_2705	Allyl cysteine	烯丙基半胱氨酸	metab_1896	B(ii)	-	-	HMDB0248164;HMDB0034323	M+NH4	C6H11NO2S	6.6783	-	C16759	pos	-	-	-	-	Organic acids and derivatives	Carboxylic acids and derivatives	179.085	0.0197682	0	46.2	2.12867	21593-77-1	Amino acids, peptides, and analogues	4.001	4.293	3.642	4.002	4.265	3.862	3.515	3.497	4.142	3.899	4.341	3.468	4.08	4.259	4.142	4.134	3.938	3.423	4.026	4.036	4.043
pos_2460	Citreoviridin	黄绿青霉素	metab_1624	B(ii)	-	-	HMDB0250305	M+Na	C23H30O6	8.4636	-	C16766	pos	-	-	-	-	Organoheterocyclic compounds	Pyrans	425.197	0.0264944	0	40.9	7.73316	25425-12-1	Pyranones and derivatives	3.22	3.183	2.516	2.676	2.072	3.155	3.358	2.94	2.859	2.904	2.674	2.424	2.186	2.987	3.135	3.323	3.091	2.507	2.998	2.986	3.009
pos_1723	Alpha-Bisabolol oxide A	-	metab_805	B(ii)	-	-	HMDB0038196	M+H-H2O	C15H26O2	8.8535	-	C16773	pos	-	-	-	-	Organoheterocyclic compounds	Oxanes	221.19	0.00634047	0	55.5	-1.08538	22567-36-8	Not Available	3.992	4.815	3.096	3.425	3.626	3.466	3.502	3.392	4.208	3.841	3.664	3.091	3.222	3.646	3.863	3.436	3.712	2.96	3.934	3.939	3.936
neg_1500	Peroxynitrite	过氧亚硝基阴离子	metab_4282	B(ii)	-	-	HMDB0002179	M-H	HNO3	1.2953	-	C16845	neg	-	-	-	-	Homogeneous non-metal compounds	Non-metal oxoanionic compounds	61.9888	0.0474767	0	62.7	7.08864	19059-14-4	Non-metal peroxynitrites	5.56	5.461	5.46	5.542	5.463	5.475	5.523	5.433	5.367	5.536	5.385	5.529	5.55	5.575	5.434	5.423	5.518	5.549	5.472	5.501	5.512
neg_1251	Cryptophycin	-	metab_4007	B(ii)	-	-	HMDB0242628	M+Na-2H	C35H43ClN2O8	5.2838	-	C16877	neg	-	-	-	-	Organic acids and derivatives	Peptidomimetics	675.244	0.0752826	0	61.7	-1.63416	124689-65-2	Hybrid peptides	3.283	3.546	2.434	2.763	2.684	2.976	2.654	2.541	2.988	2.626	2.682	2.431	1.805	2.818	2.464	2.613	2.82	2.631	2.974	2.918	2.919
pos_2322	Azaspiracid	原多甲藻酸	metab_1471	B(ii)	-	-	HMDB0033805	M+NH4	C47H71NO12	9.087	-	C16907	pos	-	-	-	-	Organoheterocyclic compounds	Azaspirodecane derivatives	859.537	0.209736	0	77.1	6.74858	214899-21-5	Not Available	2.638	2.858	2.435	2.493	2.583	2.31	2.292	2.19	2.623	2.611	2.612	2.35	2.317	2.458	2.645	2.548	2.704	2.313	2.571	2.396	2.56
neg_1368	Arctiin	牛蒡子苷	metab_4136	B(ii)	-	-	HMDB0248568;HMDB0301809;MJDBOTE0000369	M+FA-H	C27H34O11	4.2531	-	C16915	neg	-	-	-	-	Lignans, neolignans and related compounds	Lignan glycosides	579.209	0.0465881	0	30.6	1.51474	20362-31-6	Not Available	4.001	3.53	3.832	3.888	3.867	3.92	3.894	3.944	4.155	3.931	3.976	3.877	3.596	3.627	3.639	3.939	3.807	4.027	3.912	3.906	3.874
pos_1613	Cnidilide	蛇床子内酯	metab_683	B(ii)	-	-	HMDB0302259	M+Na	C12H18O2	7.4361	-	C16937	pos	-	-	-	-	Organoheterocyclic compounds	Isobenzofurans	217.12	0.144567	0	38.2	1.32388	3674-03-01	Not Available	1.667	1.53	1.896	1.944	1.825	1.96	1.927	1.911	1.246	1.971	1.625	1.891	2.05	1.772	1.909	1.858	2.851	1.824	1.912	2.035	1.967
pos_2525	Cyperolone	香附醇酮	metab_1696	B(ii)	-	-	HMDB0036680	M+H	C15H24O2	7.9278	-	C16946	pos	-	-	-	-	Organic oxygen compounds	Organooxygen compounds	237.185	0.045388	0	69.5	-0.390833	13741-46-3	Alcohols and polyols	2.715	2.848	0.7405	2.783	2.751	2.751	1.728	1.15	3.232	2.065	3.18	0.6123	2.67	3.044	2.672	2.597	2.515	1.195	2.717	2.756	2.736
pos_2510	Dehydrocurdione	脱氢氯丁酮	metab_1680	B(ii)	-	-	HMDB0035407	M+H-H2O	C15H22O2	8.0307	-	C16949	pos	-	-	-	-	Lipids and lipid-like molecules	Prenol lipids	217.159	0.0965581	0	74.5	0.549158	38230-32-9	Sesquiterpenoids	2.507	2.77	0.0699	2.606	2.652	2.552	0.07614	0.1702	3.311	1.595	3.024	0.2842	2.631	2.977	2.196	1.794	1.788	0.3084	2.54	2.621	2.604
pos_2547	Germacrone	杜鹃酮	metab_1720	B(ii)	-	-	HMDB0252704	M+H	C15H22O	7.7221	-	C16966	pos	-	-	-	-	Lipids and lipid-like molecules	Prenol lipids	219.174	0.0284643	0	77.9	0.389732	6902-91-6	Sesquiterpenoids	3.376	3.689	2.622	3.273	3.194	3.159	2.583	2.414	3.889	3.014	3.515	2.522	3.176	3.557	3.061	2.899	2.866	2.508	3.268	3.282	3.292
pos_2397	Isocyperol	异丙二醇	metab_1553	B(ii)	-	-	HMDB0035718	M+Na	C15H24O	8.8535	-	C16974	pos	-	-	-	-	Lipids and lipid-like molecules	Prenol lipids	243.172	0.0561274	0	64.9	0.946893	20085-00-1	Sesquiterpenoids	2.854	3.632	2.198	2.397	2.53	2.414	2.372	2.308	2.941	2.697	2.46	2.151	2.263	2.468	2.659	2.294	2.526	2.032	2.831	2.79	2.79
neg_141	Gein	水杨梅苷	metab_4183	B(ii)	-	-	HMDB0029909	M-H, M+FA-H	C21H30O11	5.3511	-	C17058	neg	Steroids	24-Carbon atoms	-	-	Organic oxygen compounds	Organooxygen compounds	503.175	0.0451216	0	31.2	-4.55658	585-90-0	Carbohydrates and carbohydrate conjugates	3.355	2.435	2.971	3.002	2.842	3.156	3.529	2.898	3.174	3.217	3.144	2.854	2.786	2.797	3.077	3.316	2.957	2.939	3.139	3.104	3.106
pos_3641	Homomethionine	高蛋氨酸	metab_2936	B(ii)	map01210;map01110;map00966	2-Oxocarboxylic acid metabolism;Biosynthesis of secondary metabolites;Glucosinolate biosynthesis	HMDB0030406	M+H	C6H13NO2S	0.9968	2-氧羰基酸代谢;次级代谢产物的生物合成;硫代葡萄糖苷生物合成	C17213	pos	-	-	Metabolism;Metabolism;Metabolism	Global and overview maps;Global and overview maps;Biosynthesis of other secondary metabolites	Organic acids and derivatives	Carboxylic acids and derivatives	164.074	0.072844	0	63.6	-0.966728	25148-30-5	Amino acids, peptides, and analogues	2.306	1.931	2.565	2.229	2.301	2.528	2.37	2.209	2.399	2.097	2.85	2.728	2.882	2.683	2.764	2.566	2.682	2.249	2.453	2.488	2.517
pos_3487	2-(5'-methylthio)pentylmalate	2-（5'-甲硫基）戊基苹果酸	metab_2764	B(ii)	map01210;map00966	2-Oxocarboxylic acid metabolism;Glucosinolate biosynthesis	HMDB0304052	2M+H	C10H16O5S-2	1.202	2-氧羰基酸代谢;硫代葡萄糖苷生物合成	C17222	pos	-	-	Metabolism;Metabolism	Global and overview maps;Biosynthesis of other secondary metabolites	Organic acids and derivatives	Hydroxy acids and derivatives	497.148	0.0923469	0	43.3	-6.13889	-	Medium-chain hydroxy acids and derivatives	1.929	2.466	1.888	1.158	2.113	1.835	1.143	1.425	1.983	1.739	2.35	1.966	2.083	2.336	2.323	2.024	1.909	1.153	2.169	2.203	2.248
pos_3116	Kanokoside C	甘草苷C	metab_2353	B(ii)	-	-	HMDB0035305	M+ACN+Na	C27H42O17	4.5486	-	C17430	pos	-	-	-	-	Organic oxygen compounds	Organooxygen compounds	702.263	0.11773	0	30.6	7.32864	64703-87-3	Carbonyl compounds	1.92	1.703	1.01	1.47	0.9265	2.3	1.861	2.082	2.403	1.391	2.059	1.22	0.6053	1.588	0.6826	1.83	1.809	2.393	1.855	1.946	1.868
pos_3398	Rhamnazin 3-rutinoside	鼠李糖甙3-芸香苷	metab_2665	B(ii)	-	-	LMPK12112634;HMDB0037467	M+Na	C29H34O16	1.4418	-	C17441	pos	-	-	-	-	Phenylpropanoids and polyketides	Flavonoids	661.169	0.0604047	0	57.1	-7.16522	64527-08-8	Flavonoid glycosides	0.5167	0.5307	2.385	0.4366	0.4475	1.786	2.204	2.428	2.345	2.317	2.546	2.272	1.951	1.418	2.503	2.459	2.415	2.006	2.215	2.236	2.184
pos_3015	Parishin C	巴利森苷C	metab_2241	B(ii)	-	-	HMDB0256129	M+ACN+H	C32H40O19	5.0784	-	C17466	pos	-	-	-	-	Organic oxygen compounds	Organooxygen compounds	770.252	0.0401299	0	36.5	2.48499	-	Carbohydrates and carbohydrate conjugates	1.978	2.295	1.225	1.449	1.716	1.761	2.069	1.879	2.379	1.213	2.338	1.532	1.717	2.168	1.746	2.21	1.702	1.753	1.893	1.891	1.921
neg_1191	Sec-o-Glucosylhamaudol	亥茅酚苷	metab_3940	B(ii)	-	-	HMDB0258199	M-H	C21H26O10	5.6764	-	C17484	neg	-	-	-	-	Organoheterocyclic compounds	Benzopyrans	437.145	0.0180213	0	64.9	-0.246439	-	1-benzopyrans	3.383	3.63	3.434	3.118	2.972	2.966	3.447	3.579	3.611	3.17	3.194	3.256	2.887	3.207	3.112	3.756	3.766	2.847	3.471	3.458	3.456
pos_2385	Curdione	姜黄二酮	metab_1540	B(ii)	-	-	HMDB0034714	M+H-H2O	C15H24O2	8.9344	-	C17493	pos	-	-	-	-	Lipids and lipid-like molecules	Prenol lipids	219.175	0.0167266	0	86	1.3675	13657-68-6	Sesquiterpenoids	3.713	3.906	2.523	3.282	3.41	3.296	3.317	2.401	3.952	3.389	3.751	2.65	3.339	3.767	3.513	3.31	2.979	2.455	3.496	3.502	3.51
pos_800	Rotundone	莎草薁酮	metab_3507	B(ii)	-	-	HMDB0036443	M+H, M+Na	C15H22O	8.5662	-	C17501	pos	-	-	-	-	Lipids and lipid-like molecules	Prenol lipids	219.174	0.0251039	0	50.4	0.223845	18374-76-0	Sesquiterpenoids	3.202	3.046	2.532	3.507	3.472	3.413	2.712	2.629	3.957	2.771	3.871	2.388	3.465	3.709	3.302	3.243	3.047	2.655	3.368	3.388	3.384
pos_2527	Isocolumbin	异古伦宾	metab_1698	B(ii)	-	-	HMDB0036837	M+H-2H2O	C20H22O6	7.8936	-	C17508	pos	-	-	-	-	Organoheterocyclic compounds	Naphthopyrans	323.129	0.0287195	0	83.5	2.14692	471-54-5	Not Available	3.137	2.983	2.469	2.714	2.516	2.581	2.991	2.857	3.12	3.038	2.977	2.715	2.416	2.744	3.051	3.187	2.872	2.593	2.918	2.932	2.943
pos_2292	Gamma-Terpineol	-	metab_1437	B(ii)	-	-	HMDB0036993	2M+NH4	C10H18O	9.2037	-	C17518	pos	-	-	-	-	Lipids and lipid-like molecules	Prenol lipids	326.303	0.133495	0	49.1	-6.47411	586-81-2	Monoterpenoids	1.861	1.969	1.727	2.015	2.001	1.714	1.833	1.318	1.951	1.743	2	1.849	1.926	2.016	2.04	2.037	1.967	1.426	1.931	1.835	1.834
pos_1396	Kukoamine C	库科明C	metab_441	B(ii)	-	-	HMDB0060526	M+Na	C28H42N4O6	5.2992	-	C17617	pos	-	-	-	-	Benzenoids	Phenols	553.302	0.0616616	0	43.5	4.88027	-	Benzenediols	3.043	2.763	2.519	1.108	2.925	2.142	2.92	1.387	3.069	2.962	3.26	2.597	2.796	3.129	3.107	3.091	1.959	1.361	2.838	2.888	2.883
neg_736	Neoarctin B	新阿霉素B	metab_5048	B(ii)	-	-	HMDB0302320	M-H	C42H46O12	6.9045	-	C17683	neg	-	-	-	-	Lignans, neolignans and related compounds	Furanoid lignans	741.298	0.237172	0	38.1	8.39187	-	Tetrahydrofuran lignans	2.325	2.994	0.5581	0.8671	1.431	2.247	0.6011	0.6005	0.6328	0.5839	0.5653	0.5836	0.5012	0.9328	1.097	0.6056	0.5772	0.5584	1.748	1.636	1.549
pos_3283	4,5-seco-dopa	4，5 -开环多巴	metab_2538	B(ii)	map01100;map01110;map00965	Metabolic pathways;Biosynthesis of secondary metabolites;Betalain biosynthesis	HMDB0304164	M+CH3OH+H	C9H11NO6	3.2445	代谢途径;次级代谢产物的生物合成;倍他林生物合成	C17758	pos	-	-	Metabolism;Metabolism;Metabolism	Global and overview maps;Global and overview maps;Biosynthesis of other secondary metabolites	Organic acids and derivatives	Carboxylic acids and derivatives	262.094	0.0663088	0	58.7	6.89709	-	Amino acids, peptides, and analogues	1.729	1.71	0.6491	1.557	0.393	1.322	1.407	0.6876	1.493	0.4402	1.326	1.239	1.272	1.731	1.526	1.605	1.63	1.016	1.553	1.497	1.532
neg_629	Lappaol D	拉帕尔D	metab_5343	B(ii)	-	-	HMDB0302070	M+FA-H	C30H32O9	5.6877	-	C17812	neg	-	-	-	-	Phenylpropanoids and polyketides	2-arylbenzofuran flavonoids	581.199	0.00682861	0	33.7	-6.39538	-	Not Available	3.341	3.008	3.777	3.409	3.341	3.606	3.39	3.859	3.571	3.658	3.349	3.728	3.247	3.079	3.12	3.46	3.375	3.728	3.496	3.494	3.5
pos_3017	Dehydrozingerone	脱氢酮	metab_2243	B(ii)	-	-	HMDB0032591	M+H-H2O	C11H12O3	5.0784	-	C17840	pos	-	-	-	-	Phenylpropanoids and polyketides	Cinnamic acids and derivatives	175.075	0.220111	0	33.6	0.451861	1080-12-2	Hydroxycinnamic acids and derivatives	2.154	2.375	1.476	1.762	1.947	2.123	1.835	2.037	2.284	1.506	2.324	1.518	1.438	2.008	1.917	2.195	2.02	2.064	1.915	2.077	2.103
neg_546	Coniferyl ferulate	阿魏酸松泊酯	metab_4839	B(ii)	-	-	HMDB0250437	M+FA-H	C20H20O6	4.904	-	C17855	neg	-	-	-	-	Phenylpropanoids and polyketides	Cinnamic acids and derivatives	401.127	0.029599	0	34.3	8.70641	63644-62-2	Hydroxycinnamic acids and derivatives	2.07	1.999	1.79	2.163	2.04	2.077	1.95	1.941	2.34	1.803	2.229	1.895	1.572	2.184	1.969	2.17	2.267	2.065	2.156	2.151	2.131
pos_2483	Cerebronic acid	脑酸	metab_1649	B(ii)	-	-	HMDB0039540	M+NH4	C24H48O3	8.2932	-	C17873	pos	-	-	-	-	Lipids and lipid-like molecules	Fatty Acyls	402.394	0.046206	0	32.8	-0.169015	544-57-0	Fatty acids and conjugates	2.388	2.434	1.996	2.348	2.597	2.645	2.486	1.717	2.562	2.538	2.688	2.182	2.553	3.074	2.563	2.482	2.516	2.087	2.496	2.482	2.521
pos_2761	Coixinden B	-	metab_1958	B(ii)	-	-	HMDB0040906	M+H	C13H14O4	6.3693	-	C17917	pos	-	-	-	-	Benzenoids	Indenes and isoindenes	235.097	0.0496231	0	60.5	1.5844	151466-74-9	Not Available	2.774	3.385	2.026	2.409	2.299	2.082	2.321	2.22	2.559	2.431	2.356	2.066	0.8056	2.535	2.523	2.641	3.183	1.671	2.654	2.697	2.682
pos_670	Irigenin	鸢尾素	metab_3362	B(i)	-	-	LMPK12050417;HMDB0303159;MJDBOTE0001235	M+H, M+Na	C18H16O8	6.5477	-	C17957	pos	-	-	-	-	Phenylpropanoids and polyketides	Isoflavonoids	361.093	0.0363022	55.7	0	2.26489	548-76-5	O-methylated isoflavonoids	2.985	1.395	3.506	1.489	1.278	2.711	3.157	4.584	3.629	3.089	2.832	3.555	1.957	2.675	1.551	2.44	2.096	4.682	3.752	3.774	3.782
pos_3648	2,3',4,4',5-Pentachlorobiphenyl	2,3'，4,4'，5-五氯联苯	metab_2943	B(ii)	-	-	HMDB0246145	2M+K	C12H5Cl5	0.9845	-	C18118	pos	-	-	-	-	Benzenoids	Benzene and substituted derivatives	686.732	0.15282	0	62.8	3.60428	31508-00-6	Biphenyls and derivatives	1.949	1.51	2.039	2.319	1.629	2.298	2.1	1.923	1.937	2.191	1.889	2.229	2.241	2.176	2.319	2.047	2.148	2.315	1.99	2.098	2.119
neg_1178	Resolvin E1	溶解素E1	metab_3925	B(ii)	-	-	HMDB0010410;LMFA03140003	M+K-2H	C20H30O5	5.7214	-	C18171	neg	-	-	-	-	Lipids and lipid-like molecules	Fatty Acyls	387.161	0.0734439	0	33.6	9.2705	-	Eicosanoids	1.923	2.025	1.716	1.765	1.849	1.84	1.393	1.312	1.84	1.478	1.854	0.993	1.475	1.864	1.614	1.897	1.605	1.454	1.838	1.777	1.797
neg_807	16-Hydroxyhexadecanoic acid	16 -羟基十六烷酸	metab_5127	B(ii)	map01100;map00073	Metabolic pathways;Cutin, suberine and wax biosynthesis	HMDB0006294	M-H	C16H32O3	9.4315	代谢途径;角质、木栓碱和蜡的生物合成	C18218	neg	-	-	Metabolism;Metabolism	Global and overview maps;Lipid metabolism	Lipids and lipid-like molecules	Fatty Acyls	271.229	0.0284305	0	50.8	3.99818	506-13-8	Fatty acids and conjugates	3.212	3.343	3.324	3.386	3.28	3.181	3.48	3.379	3.175	3.351	3.309	3.464	3.435	3.361	3.607	3.377	3.612	2.991	3.322	3.345	3.34
pos_479	Trinexapac-ethyl	三癸二酸乙酯	metab_3149	B(ii)	-	-	HMDB0259248	M+H-H2O, M+H	C13H16O5	3.9112	-	C18541	pos	-	-	-	-	Organic acids and derivatives	Vinylogous acids	253.108	0.0447772	0	48	2.6851	95266-40-3	Not Available	2.882	2.742	2.777	2.881	2.823	2.84	2.759	2.659	3.002	2.705	3.028	2.784	2.87	3.013	3.007	3.047	2.905	2.666	2.837	2.875	2.867
pos_3163	N-Jasmonoylisoleucine	N -茉莉酸基异亮氨酸	metab_2405	B(ii)	map04075	Plant hormone signal transduction	HMDB0029391	M+Na	C18H29NO4	4.1041	植物激素信号转导	C18699	pos	-	-	Environmental Information Processing	Signal transduction	Organic acids and derivatives	Carboxylic acids and derivatives	346.197	0.277869	0	36.2	-4.29266	120330-93-0	Amino acids, peptides, and analogues	2.018	1.953	1.263	1.546	1.416	1.995	1.85	1.524	1.935	1.785	2.208	1.92	1.981	2.193	2.11	1.965	2.044	1.622	1.847	2.002	1.777
pos_1181	BENAZOLIN	苯那唑啉	metab_203	B(ii)	-	-	HMDB0248943	M+NH4	C9H6ClNO3S	2.1338	-	C18775	pos	-	-	-	-	Organic acids and derivatives	Carboxylic acids and derivatives	261.009	0.124243	0	41.4	-0.953895	3813-05-06	Amino acids, peptides, and analogues	3.578	3.773	3.612	3.759	3.875	3.784	3.343	3.362	3.478	3.812	3.503	3.441	3.621	3.524	3.417	3.191	3.445	3.437	3.487	3.584	3.501
pos_3455	Sulprofos	苏尔普罗福斯	metab_2729	B(ii)	-	-	HMDB0258619	M+H-H2O	C12H19O2PS3	1.259	-	C19016	pos	-	-	-	-	Benzenoids	Benzene and substituted derivatives	305.027	0.122744	0	38.4	5.88739	35400-43-2	Phenoxy compounds	2.573	2.651	2.149	2.341	2.132	2.53	2.365	1.899	2.376	2.514	2.466	1.268	2.171	2.359	2.463	2.583	2.563	2	2.451	2.543	2.549
pos_1604	4-Vinylcyclohexene	4-乙烯基环己烯	metab_673	B(ii)	-	-	HMDB0246592	M+H	C8H12	7.3905	-	C19310	pos	-	-	-	-	Hydrocarbons	Unsaturated hydrocarbons	109.101	0.0465006	0	87	-2.7969	100-40-3	Olefins	2.395	2.711	2.018	2.083	2.286	2.08	1.934	1.995	2.444	2.264	2.232	2.017	2.033	2.207	2.115	2.083	2.145	1.762	2.287	2.249	2.282
neg_699	4-Vinylcyclohexene dioxide	4-乙烯基环己烯双环氧化合物	metab_5006	B(ii)	-	-	HMDB0246593	M+FA-H	C8H12O2	6.4695	-	C19311	neg	-	-	-	-	Organoheterocyclic compounds	Oxepanes	185.083	0.0500481	0	68	7.2514	-	Not Available	2.99	2.935	2.402	2.866	2.926	2.987	2.907	2.741	2.955	2.654	3.031	2.057	2.29	2.601	2.908	2.986	2.749	2.865	2.867	2.91	2.894
neg_384	1-Amino-2-methylanthraquinone	1 -氨基- 2 -甲基蒽醌	metab_4660	B(ii)	-	-	HMDB0243816	2M+Hac-H	C15H11NO2	1.2183	-	C19320	neg	-	-	-	-	Benzenoids	Anthracenes	533.172	0.0988196	0	80.4	0.877939	82-28-0	Anthraquinones	2.035	1.784	2.394	1.839	2.84	2.686	2.634	2.705	2.865	2.759	3.061	2.756	2.793	2.71	2.923	3.038	2.697	2.432	2.775	2.851	2.852
pos_3135	2-Butenal	2-丁烯醛	metab_2374	B(ii)	-	-	HMDB0034233;HMDB0303986	2M+Na	C4H6O	4.3428	-	C19377	pos	-	-	-	-	Organic oxygen compounds	Organooxygen compounds	163.074	0.0721133	0	84	8.73388	4170-30-3;123-73-9	Carbonyl compounds	2.333	1.197	1.882	1.975	1.901	2.177	2.158	2.11	2.413	2.284	2.298	2.208	1.856	1.945	1.93	2.204	1.899	2.2	2.125	2.16	2.098
neg_947	9,10-Epoxyoctadecanoic acid	9,10-邻二羟基十八酸	metab_5338	B(ii)	map00073	Cutin, suberine and wax biosynthesis	HMDB0061650;LMFA02000326;HMDB0247617	M-H2O-H	C18H34O4	9.2437	角质、木栓碱和蜡的生物合成	C19418	neg	-	-	Metabolism	Lipid metabolism	Lipids and lipid-like molecules	Fatty Acyls	295.229	0.0404958	0	45.6	2.62469	154966-80-0	Fatty acids and conjugates	3.512	3.613	3.446	3.59	3.574	3.526	3.702	3.54	3.599	3.663	3.69	3.664	3.662	3.664	3.872	3.672	3.804	3.426	3.611	3.642	3.613
neg_1225	Sulfamethazine	磺胺二甲基嘧啶	metab_3978	B(ii)	-	-	HMDB0015522;MJDBOTE0001056	M+Na-2H	C12H14N4O2S	5.4969	-	C19530	neg	-	-	-	-	Benzenoids	Benzene and substituted derivatives	299.059	0.0507662	0	34.1	3.18403	57-68-1	Benzenesulfonamides	2.178	2.092	0.3993	1.514	2.177	1.473	0.2713	0.2709	2.341	1.908	2.443	1.191	0.549	2.517	2.217	1.94	1.476	0.2454	2.054	2.033	2.01
pos_2306	Floionolic acid	氟离子酸	metab_1453	B(ii)	map00073	Cutin, suberine and wax biosynthesis	HMDB0034295;LMFA02000147	M+H-H2O	C18H36O5	9.1448	角质、木栓碱和蜡的生物合成	C19621	pos	-	-	Metabolism	Lipid metabolism	Lipids and lipid-like molecules	Fatty Acyls	315.253	0.0424511	0	68.2	1.49348	17705-68-9	Fatty acids and conjugates	3.496	3.571	3.491	3.616	3.62	3.738	3.555	3.558	3.505	3.607	3.612	3.571	3.686	3.63	3.664	3.569	3.621	3.525	3.584	3.62	3.611
pos_64	Oleamide	油酰胺	metab_3328	B(i)	-	-	HMDB0247607;HMDB0002117;LMFA08010004	M+Na, 2M+Na, M+H, 2M+H	C18H35NO	9.5437	-	C19670	pos	-	-	-	-	Lipids and lipid-like molecules	Fatty Acyls	282.279	0.0759366	71.7	0	0.863099	301-02-0	Fatty amides	6.322	6.213	6.383	6.425	6.398	6.295	6.307	6.289	6.169	6.233	6.174	6.284	6.361	6.284	6.235	6.259	6.305	6.222	6.327	6.268	6.274
neg_698	Cis-3-Hexenyl acetate	-	metab_5005	B(ii)	map00592;map01110	alpha-Linolenic acid metabolism;Biosynthesis of secondary metabolites	HMDB0040215;HMDB0032533	M+FA-H	C8H14O2	6.4584	α-亚麻酸代谢;次级代谢产物的生物合成	C19757	neg	-	-	Metabolism;Metabolism	Lipid metabolism;Global and overview maps	Organic acids and derivatives	Carboxylic acids and derivatives	187.098	0.0902236	0	72.1	5.48823	3681-82-1;3681-71-8	Carboxylic acid derivatives	2.687	2.489	2.032	2.696	2.612	2.648	2.374	1.867	2.739	2.37	2.746	1.866	2.513	2.897	2.827	2.788	2.787	2.118	2.684	2.64	2.606
pos_2787	Phomopsin A	拟茎点霉毒素A	metab_1986	B(ii)	-	-	HMDB0030447	M+H-2H2O	C36H45ClN6O12	6.2029	-	C19955	pos	-	-	-	-	Organic acids and derivatives	Carboxylic acids and derivatives	753.26	0.0588303	0	48.1	-6.21998	64925-80-0	Amino acids, peptides, and analogues	2.698	2.773	2.516	2.933	2.621	2.957	2.673	2.784	2.721	2.378	2.638	2.308	2.791	2.281	2.438	2.78	2.756	2.738	2.723	2.744	2.693
neg_420	8-Oxo-dGMP	8 - Oxo - dGMP	metab_4701	B(ii)	-	-	HMDB0011670	M-H2O-H	C10H14N5O8P	2.7109	-	C19968	neg	-	-	-	-	Nucleosides, nucleotides, and analogues	Purine nucleotides	344.04	0.0533184	0	30.5	0.783389	127027-50-3	Purine deoxyribonucleotides	0.6595	0.5675	1.948	1.518	0.5805	1.409	1.612	1.827	1.448	1.323	1.862	2.275	1.841	1.46	1.577	1.488	1.581	0.7213	1.598	1.623	1.578
pos_2533	Dibenzothiophene	二苯并噻吩	metab_1705	B(ii)	-	-	HMDB0251165	M+H	C12H8S	7.8251	-	C20125	pos	-	-	-	-	Organoheterocyclic compounds	Benzothiophenes	185.041	0.145025	0	50.1	-3.43948	132-65-0	Dibenzothiophenes	1.508	1.925	1.08	1.406	1.638	1.37	1.117	1.09	2.039	1.212	2.033	1.142	1.308	1.929	1.504	1.21	1.305	1.13	1.303	1.422	1.399
pos_1648	Dihydrocapsiate	二氢衣壳酸盐	metab_721	B(ii)	-	-	HMDB0034781;HMDB0034780	M+H	C18H28O4	7.8821	-	C20203	pos	-	-	-	-	Benzenoids	Phenols	309.207	0.0309177	0	78.4	1.59865	-	Methoxyphenols	2.726	3.003	2.551	2.898	2.881	2.781	2.581	2.43	2.654	2.83	2.733	2.558	2.869	2.979	3.048	2.764	3.099	2.436	2.775	2.795	2.801
pos_2903	Eugenin	丁子香色酮	metab_2116	B(ii)	-	-	HMDB0036627	M+H	C11H10O4	5.7599	-	C20210	pos	-	-	-	-	Organoheterocyclic compounds	Benzopyrans	207.065	0.0587498	0	51.2	0.362174	480-34-2	1-benzopyrans	2.924	2.505	3.174	2.884	2.602	3.025	2.66	2.918	3.127	3.079	2.754	3.121	2.825	2.552	2.473	3.074	2.958	3.219	2.915	2.965	2.95
pos_2886	Steviol	甜菊醇	metab_2096	B(ii)	-	-	HMDB0036706;LMPR01040120	M+H	C20H30O3	5.8077	-	C20212	pos	-	-	-	-	Lipids and lipid-like molecules	Prenol lipids	319.227	0.0997573	0	57.7	0.47788	471-80-7	Diterpenoids	3.501	3.831	2.177	1.855	3.218	2.81	2.54	1.12	2.641	1.598	2.748	1.642	2.487	3.245	3.314	2.598	2.027	1.241	3.028	3.094	3.112
pos_3204	Combretastatin A4	康布雷他汀A4	metab_2451	B(ii)	-	-	HMDB0250413;HMDB0253622	M+K	C18H20O5	3.6517	-	C20268	pos	-	-	-	-	Phenylpropanoids and polyketides	Stilbenes	355.097	0.282549	0	52.5	7.60695	117048-59-6	Not Available	0.8634	1.145	0.9529	1.36	1.216	1.535	0.9818	1.125	1.855	1.639	1.845	1.122	1.197	1.209	1.069	1.283	1.251	1.206	1.624	1.404	1.462
neg_646	Mycophenolic acid	霉酚酸	metab_5346	B(ii)	-	-	HMDB0015159;HMDB0014826;PW_C009457	M+FA-H	C17H20O6	5.7886	-	C20380	neg	-	-	-	-	Organoheterocyclic compounds	Isocoumarans	365.122	0.0487689	0	32.1	-6.35096	128794-94-5;24280-93-1	Isobenzofuranones	2.866	2.68	2.019	2.565	2.704	3.039	3.024	2.395	2.704	2.702	2.913	2.06	2.1	2.51	2.923	3.028	2.862	2.834	2.832	2.792	2.801
pos_2449	12S-HHT	12S - HHT	metab_1611	B(ii)	-	-	HMDB0012535	M+Na	C17H28O3	8.5434	-	C20388	pos	-	-	-	-	Lipids and lipid-like molecules	Fatty Acyls	303.192	0.0886765	0	65.6	-2.41933	54397-84-1	Fatty acids and conjugates	1.938	2.266	0.8708	1.905	1.743	1.843	2.111	1.132	1.745	1.91	2.004	1.349	1.899	2.082	2.341	1.983	2.472	0.8581	1.937	2.009	1.999
pos_1664	Mycorradicin	霉素	metab_739	B(ii)	-	-	HMDB0302033	M+H-H2O	C14H16O4	8.1334	-	C20426	pos	-	-	-	-	Lipids and lipid-like molecules	Fatty Acyls	231.102	0.0337787	0	40	0.404259	160162-46-9	Fatty acids and conjugates	1.572	2.665	0.4429	2.351	1.419	1.827	0.4691	0.4503	0.6595	0.5392	0.5612	0.4869	0.48	0.5659	0.5495	1.506	1.967	0.4783	1.729	1.703	1.706
pos_3115	Coumaryl acetate	醋酸香豆素	metab_2352	B(ii)	map00940;map01110	Phenylpropanoid biosynthesis;Biosynthesis of secondary metabolites	HMDB0304297	M+H	C11H12O3	4.5715	苯丙烷生物合成;次级代谢产物的生物合成	C20465	pos	-	-	Metabolism;Metabolism	Biosynthesis of other secondary metabolites;Global and overview maps	Benzenoids	Benzene and substituted derivatives	193.086	0.0714267	0	38.4	-0.788569	-	Styrenes	2.196	1.497	2.255	1.977	1.805	2.246	2.092	2.232	2.285	2.026	2.066	2.198	1.529	2.004	1.684	2.247	2.084	2.306	2.067	2.011	2.064
neg_1445	Vanilloyl glucose	香草醛基葡萄糖	metab_4221	B(ii)	-	-	HMDB0302470	M-H	C14H18O9	3.1856	-	C20470	neg	-	-	-	-	Phenylpropanoids and polyketides	Tannins	329.089	0.0202185	0	43.5	2.947	-	Hydrolyzable tannins	3.053	2.727	2.916	3.189	2.944	2.989	2.947	3.018	2.923	3.097	2.89	2.942	2.918	2.999	2.946	2.993	3.033	2.902	2.988	2.971	2.983
pos_1776	Lovastatin acid	洛伐他汀酸	metab_863	B(ii)	map01100;map01110	Metabolic pathways;Biosynthesis of secondary metabolites	HMDB0254177	M+Na	C24H38O6	9.274	代谢途径;次级代谢产物的生物合成	C21130	pos	-	-	Metabolism;Metabolism	Global and overview maps;Global and overview maps	Organic acids and derivatives	Hydroxy acids and derivatives	445.254	0.0816163	0	54.7	-3.74102	75225-51-3	Medium-chain hydroxy acids and derivatives	2.048	2.281	2.026	2.093	2.06	1.912	1.766	1.814	1.617	2.401	1.848	1.831	2.042	1.856	2.191	1.805	1.974	1.641	2.135	2.066	2.089
pos_1262	Violacein	紫色杆菌素	metab_293	B(ii)	map01100;map01110	Metabolic pathways;Biosynthesis of secondary metabolites	HMDB0259831	2M+NH4	C20H13N3O3	3.495	代谢途径;次级代谢产物的生物合成	C21136	pos	-	-	Metabolism;Metabolism	Global and overview maps;Global and overview maps	Organoheterocyclic compounds	Indoles and derivatives	704.22	0.0358239	0	34.5	-7.65979	548-54-9	Hydroxyindoles	3.106	2.547	3.269	2.809	2.917	3.112	3.402	3.476	3.366	3.258	3.335	3.499	3.12	3.067	3.221	3.349	3.154	3.544	3.264	3.281	3.295
pos_3543	Isoprenyl alcohol	异戊醇	metab_2827	B(ii)	-	-	HMDB0033854	M+NH4	C5H10O	1.075	-	C21402	pos	-	-	-	-	Organic oxygen compounds	Organooxygen compounds	104.107	0.121301	0	42.1	-1.56067	115-18-4	Alcohols and polyols	4.907	4.831	4.777	4.791	4.786	4.959	4.873	4.803	5.02	4.879	5.133	4.83	4.947	5.067	5.019	4.965	4.978	4.721	4.847	4.951	4.926
pos_2393	Tulathromycin A	图拉霉素A	metab_1549	B(ii)	-	-	HMDB0259324	M+ACN+Na	C41H79N3O12	8.8535	-	C21788	pos	-	-	-	-	Organic oxygen compounds	Organooxygen compounds	869.585	0.0860967	0	43.2	4.15631	217500-96-4	Carbohydrates and carbohydrate conjugates	1.22	1.212	0.4209	1.971	2.271	1.8	1.539	0.4281	0.8152	0.9536	1.579	0.6409	1.452	2.256	1.436	1.122	1.614	0.4553	1.669	1.638	1.595
pos_3610	Hexacosanoyl-CoA	二十六烷酰- CoA	metab_2902	B(ii)	map01212;map01040	Fatty acid metabolism;Biosynthesis of unsaturated fatty acids	HMDB0006459;LMFA07050327	M+CH3OH+H	C47H86N7O17P3S	0.9968	脂肪酸代谢;不饱和脂肪酸的生物合成	C21932	pos	-	-	Metabolism;Metabolism	Global and overview maps;Lipid metabolism	Lipids and lipid-like molecules	Fatty Acyls	1178.53	0.115171	0	96.6	-1.76066	99313-57-2	Fatty acyl thioesters	2.69	2.488	2.278	2.475	2.193	2.588	2.682	2.517	2.517	2.704	2.36	2.471	2.335	2.64	2.45	2.481	2.573	2.742	2.521	2.62	2.591
pos_1576	Sapienic acid	皂甙酸	metab_641	B(ii)	-	-	LMFA01030267;HMDB0257483	M+NH4	C16H30O2	7.1003	-	C21942	pos	-	-	-	-	Lipids and lipid-like molecules	Fatty Acyls	272.259	0.22603	0	50.3	3.97885	17004-51-2	Fatty acids and conjugates	2.772	2.547	2.601	2.814	2.736	2.872	2.72	2.73	2.636	2.88	2.716	2.857	2.76	2.755	2.701	2.749	2.709	2.717	2.598	2.793	2.766
pos_2197	Cis-Vaccenic acid	-	metab_1331	B(ii)	-	-	LMFA01030076;HMDB0240219	M+	C18H34O2	9.5547	-	C21944;C08367	pos	-	-	-	-	Lipids and lipid-like molecules	Fatty Acyls	282.258	0.167052	0	45.9	7.72013	506-17-2	Fatty acids and conjugates	2.248	2.531	2.595	2.718	2.646	2.485	2.67	1.262	2.52	2.712	2.059	2.767	2.749	2.477	2.268	2.648	2.335	2.246	2.37	2.503	2.501
[truncated: 3 more rows]

## Sheet: Table S6
Table S6 The detailed of DEMs upregulated and downregulated in three comparison groups
[truncated: 318 more rows]

## Sheet: Table S7
Table S7 The Summary of KEGG enrichment pathways
[truncated: 100 more rows]

## Sheet: Table S8
Table S8 The detailed of LMWOA&AAs upregulated and downregulated in three comparison groups
[truncated: 61 more rows]

[truncated: 3 more sheets: Table S9, Table S10, Table S11]
